# Supplementary material for: A compendium of genetic regulatory effects across pig tissues
Source: Research Square preprint supplement (doi:10.21203/rs.3.rs-2261680/v1), 2022-11-25
Supplement: Supplementary file 1 [file 60813cc01f6f22e75562a420.xlsx]

## Sheet: Table S1
Table S1. Summary of RNA-Seq samples used in the pilot PigGTEx project.
BioSample	BioProject	LibraryLayout	Platform	Model	Subspecies	Breed	Predicted breed label	Breed group	Sex	Age	Clean reads	Mapped reads	Mapping rate	Expressed gene count	Expressed gene ratio	Tissue class	Main categories	Sub categories	Note
SAMD00016663	PRJDB2835	SINGLE	ILLUMINA	Illumina HiSeq 2000	Sus scrofa	Unknown	Unknown	Unknown	Unknown	Unknown	79209508	45649283	0.5763	17590	0.551272	Unknown	Unknown	Unknown
SAMD00016665	PRJDB2835	SINGLE	ILLUMINA	Illumina HiSeq 2000	Sus scrofa	Unknown	Landrace x Yorkshire	Cross	Unknown	Unknown	200157259	174888319	0.8738	14573	0.456719	Heart	Heart	Heart
SAMD00046881	PRJDB4551	SINGLE	ILLUMINA	Illumina HiSeq 2500	Sus scrofa	Unknown	Duroc x (Landrace x Yorkshire)	Cross	Unknown	Unknown	40366030	38624608	0.9569	16859	0.528363	Oocyte	Oocyte	Oocyte
SAMD00046882	PRJDB4551	SINGLE	ILLUMINA	Illumina HiSeq 2500	Sus scrofa	Unknown	Duroc x (Landrace x Yorkshire)	Cross	Unknown	Unknown	39788068	38077270	0.957	17004	0.532907	Oocyte	Oocyte	Oocyte
SAMD00046883	PRJDB4551	SINGLE	ILLUMINA	Illumina HiSeq 2500	Sus scrofa	Unknown	Duroc x (Landrace x Yorkshire)	Cross	Unknown	Unknown	29915504	28442336	0.9508	17826	0.558669	Oocyte	Oocyte	Oocyte
SAMD00046884	PRJDB4551	SINGLE	ILLUMINA	Illumina HiSeq 2500	Sus scrofa	Unknown	Duroc x (Landrace x Yorkshire)	Cross	Unknown	Unknown	35271364	33650560	0.954	17173	0.538204	Oocyte	Oocyte	Oocyte
SAMD00046885	PRJDB4551	SINGLE	ILLUMINA	Illumina HiSeq 2500	Sus scrofa	Unknown	Duroc x (Landrace x Yorkshire)	Cross	Unknown	Unknown	34134200	31347843	0.9184	16792	0.526263	Ovarian granulosa cells	Ovary	Ovary
SAMD00046886	PRJDB4551	SINGLE	ILLUMINA	Illumina HiSeq 2500	Sus scrofa	Unknown	Duroc x (Landrace x Yorkshire)	Cross	Unknown	Unknown	36121106	32382599	0.8965	15841	0.496459	Ovarian granulosa cells	Ovary	Ovary
SAMD00046887	PRJDB4551	SINGLE	ILLUMINA	Illumina HiSeq 2500	Sus scrofa	Unknown	Duroc x (Landrace x Yorkshire)	Cross	Unknown	Unknown	36881009	32557393	0.8828	15512	0.486148	Ovarian granulosa cells	Ovary	Ovary
SAMD00046888	PRJDB4551	SINGLE	ILLUMINA	Illumina HiSeq 2500	Sus scrofa	Unknown	Duroc x (Landrace x Yorkshire)	Cross	Unknown	Unknown	38345747	35092440	0.9152	15529	0.48668	Ovarian granulosa cells	Ovary	Ovary
SAMD00057781	PRJDB5113	PAIRED	ILLUMINA	Illumina HiSeq 2500	Sus scrofa	Unknown	Unknown	Unknown	Unknown	Unknown	22255364	20619125	0.9265	14823	0.464554	Unknown	Other	Other	Outlier
SAMD00057782	PRJDB5113	PAIRED	ILLUMINA	Illumina HiSeq 2500	Sus scrofa	Unknown	Unknown	Unknown	Female	Unknown	23161949	13034346	0.5627	15371	0.481729	Unknown	Unknown	Unknown
SAMD00057783	PRJDB5113	PAIRED	ILLUMINA	Illumina HiSeq 2500	Sus scrofa	Unknown	Unknown	Unknown	Female	Unknown	22160638	12515189	0.5647	15250	0.477937	Unknown	Unknown	Unknown
SAMD00153268	PRJDB5113	PAIRED	ILLUMINA	Illumina HiSeq 2500	Sus scrofa	Large white	Landrace x Yorkshire	Cross	Female	Unknown	21591217	20047957	0.9285	14817	0.464366	Muscle	Muscle	Muscle
SAMD00153269	PRJDB5113	PAIRED	ILLUMINA	Illumina HiSeq 2500	Sus scrofa	Large white	Unknown	Unknown	Female	Unknown	21113567	11908455	0.564	15302	0.479566	Unknown	Unknown	Unknown
SAMD00153270	PRJDB5113	PAIRED	ILLUMINA	Illumina HiSeq 2500	Sus scrofa	Large white	Unknown	Unknown	Female	Unknown	20520602	11604849	0.5655	15165	0.475273	Unknown	Unknown	Unknown
SAMD00156641	PRJDB7878	PAIRED	ILLUMINA	Illumina HiSeq 2000	Sus scrofa	Unknown	Unknown	Unknown	Female	Unknown	23169059	15137251	0.6533	14535	0.455528	pFF-Exosome	Other	Other	Outlier
SAMD00156642	PRJDB7878	PAIRED	ILLUMINA	Illumina HiSeq 2000	Sus scrofa	Unknown	Unknown	Unknown	Female	Unknown	26960298	13397414	0.4969	14990	0.469788	Unknown	Unknown	Unknown
SAMD00156643	PRJDB7878	PAIRED	ILLUMINA	Illumina HiSeq 2000	Sus scrofa	Unknown	Unknown	Unknown	Female	Unknown	21815676	11663436	0.5346	15115	0.473706	Unknown	Unknown	Unknown
SAMD00156644	PRJDB7878	PAIRED	ILLUMINA	Illumina HiSeq 2000	Sus scrofa	Unknown	Duroc x (Landrace x Yorkshire)	Cross	Female	Unknown	22840474	21707689	0.9504	18354	0.575216	Ovarian granulosa cells	Ovary	Ovary
SAMD00156645	PRJDB7878	PAIRED	ILLUMINA	Illumina HiSeq 2000	Sus scrofa	Unknown	Duroc x (Landrace x Yorkshire)	Cross	Female	Unknown	24195518	22986210	0.95	17662	0.553529	Ovarian granulosa cells	Ovary	Ovary
SAMD00156646	PRJDB7878	PAIRED	ILLUMINA	Illumina HiSeq 2000	Sus scrofa	Unknown	Duroc x (Landrace x Yorkshire)	Cross	Female	Unknown	25014153	23669709	0.9463	17420	0.545945	Ovarian granulosa cells	Ovary	Ovary
SAMEA3492689	PRJEB10004	PAIRED	ILLUMINA	Illumina Genome Analyzer II	Sus scrofa	Unknown	Unknown	Unknown	Unknown	Unknown	0	0	0	0	0	Unknown	Unknown	Unknown
SAMEA3492690	PRJEB10004	PAIRED	ILLUMINA	Illumina Genome Analyzer II	Sus scrofa	Unknown	Unknown	Unknown	Unknown	Unknown	0	0	0	0	0	Unknown	Unknown	Unknown
SAMEA3492691	PRJEB10004	PAIRED	ILLUMINA	Illumina Genome Analyzer II	Sus scrofa	Unknown	Landrace x Yorkshire	Cross	Unknown	Unknown	20376524	19062991	0.9355	13502	0.423154	Macrophage	Blood	Macrophage
SAMEA3492692	PRJEB10004	PAIRED	ILLUMINA	Illumina Genome Analyzer II	Sus scrofa	Unknown	Landrace x Yorkshire	Cross	Unknown	Unknown	25732198	22999092	0.8938	13054	0.409114	Macrophage	Blood	Macrophage
SAMEA3497680	PRJEB10114	PAIRED	ILLUMINA	Illumina HiSeq 2500	Sus scrofa	Landrace x Yorkshire	Landrace x Yorkshire	Cross	Male	6 months	39959151	38033836	0.9518	16534	0.518177	Artery	Artery	Artery
SAMEA3497681	PRJEB10114	PAIRED	ILLUMINA	Illumina HiSeq 2500	Sus scrofa	Landrace x Yorkshire	Landrace x Yorkshire	Cross	Male	6 months	45154866	43227546	0.9573	16531	0.518083	Artery	Artery	Artery
SAMEA3497682	PRJEB10114	PAIRED	ILLUMINA	Illumina HiSeq 2500	Sus scrofa	Landrace x Yorkshire	Landrace x Yorkshire	Cross	Male	6 months	39410672	37583568	0.9536	16396	0.513852	Artery	Artery	Artery
SAMEA3497683	PRJEB10114	PAIRED	ILLUMINA	Illumina HiSeq 2500	Sus scrofa	Landrace x Yorkshire	Landrace x Yorkshire	Cross	Male	6 months	34347921	32712289	0.9524	16513	0.517519	Artery	Artery	Artery
SAMEA3497684	PRJEB10114	PAIRED	ILLUMINA	Illumina HiSeq 2500	Sus scrofa	Landrace x Yorkshire	Landrace x Yorkshire	Cross	Male	6 months	37464935	35583606	0.9498	16870	0.528708	Artery	Artery	Artery
SAMEA3497685	PRJEB10114	PAIRED	ILLUMINA	Illumina HiSeq 2500	Sus scrofa	Landrace x Yorkshire	Landrace x Yorkshire	Cross	Male	6 months	38573009	36409956	0.9439	16449	0.515513	Artery	Artery	Artery
SAMEA3497686	PRJEB10114	PAIRED	ILLUMINA	Illumina HiSeq 2500	Sus scrofa	Landrace x Yorkshire	Landrace x Yorkshire	Cross	Male	6 months	50072713	47974942	0.9581	16909	0.52993	Artery	Artery	Artery
SAMEA3497687	PRJEB10114	PAIRED	ILLUMINA	Illumina HiSeq 2500	Sus scrofa	Landrace x Yorkshire	Landrace x Yorkshire	Cross	Male	6 months	41456472	39594115	0.9551	15907	0.498527	Artery	Artery	Artery
SAMEA3497688	PRJEB10114	PAIRED	ILLUMINA	Illumina HiSeq 2500	Sus scrofa	Landrace x Yorkshire	Landrace x Yorkshire	Cross	Male	6 months	35298327	33745443	0.956	16375	0.513194	Artery	Artery	Artery
SAMEA3497689	PRJEB10114	PAIRED	ILLUMINA	Illumina HiSeq 2500	Sus scrofa	Landrace x Yorkshire	Landrace x Yorkshire	Cross	Male	6 months	48675045	46716496	0.9598	17176	0.538298	Artery	Artery	Artery
SAMEA3643806	PRJEB11625	PAIRED	ILLUMINA	Illumina HiSeq 2000	Sus scrofa	Unknown	Landrace x Yorkshire	Cross	Female	Unknown	31215902	29932757	0.9589	19737	0.61856	Hippocampus	Brain	Brain
SAMEA3643807	PRJEB11625	PAIRED	ILLUMINA	Illumina HiSeq 2000	Sus scrofa	(Landrace x Large White) x (Duroc x Pietrain)	(Landrace x Yorkshire) x (Duroc x Pietrain)	Cross	Female	Unknown	30345818	29128240	0.9599	19214	0.602169	Hippocampus	Brain	Brain
SAMEA3643808	PRJEB11625	PAIRED	ILLUMINA	Illumina HiSeq 2000	Sus scrofa	(Landrace x Large White) x (Duroc x Pietrain)	(Landrace x Yorkshire) x (Duroc x Pietrain)	Cross	Female	Unknown	34422710	32847214	0.9542	19465	0.610035	Hippocampus	Brain	Brain
SAMEA3643809	PRJEB11625	PAIRED	ILLUMINA	Illumina HiSeq 2000	Sus scrofa	(Landrace x Large White) x (Duroc x Pietrain)	(Landrace x Yorkshire) x (Duroc x Pietrain)	Cross	Female	Unknown	37765521	36201656	0.9586	19862	0.622477	Hippocampus	Brain	Brain
SAMEA3643810	PRJEB11625	PAIRED	ILLUMINA	Illumina HiSeq 2000	Sus scrofa	(Landrace x Large White) x (Duroc x Pietrain)	(Landrace x Yorkshire) x (Duroc x Pietrain)	Cross	Female	Unknown	26026006	23726439	0.9116	18839	0.590416	Hippocampus	Brain	Brain
SAMEA3643811	PRJEB11625	PAIRED	ILLUMINA	Illumina HiSeq 2000	Sus scrofa	(Landrace x Large White) x (Duroc x Pietrain)	(Landrace x Yorkshire) x (Duroc x Pietrain)	Cross	Female	Unknown	26029225	24870563	0.9555	19526	0.611947	Hippocampus	Brain	Brain
SAMEA3643812	PRJEB11625	PAIRED	ILLUMINA	Illumina HiSeq 2000	Sus scrofa	(Landrace x Large White) x (Duroc x Pietrain)	(Landrace x Yorkshire) x (Duroc x Pietrain)	Cross	Female	Unknown	31938453	30216057	0.9461	20159	0.631785	Hippocampus	Brain	Brain
SAMEA3643813	PRJEB11625	PAIRED	ILLUMINA	Illumina HiSeq 2000	Sus scrofa	(Landrace x Large White) x (Duroc x Pietrain)	(Landrace x Yorkshire) x (Duroc x Pietrain)	Cross	Female	Unknown	31912069	30264058	0.9484	19775	0.619751	Hippocampus	Brain	Brain
SAMEA3643814	PRJEB11625	PAIRED	ILLUMINA	Illumina HiSeq 2000	Sus scrofa	Duroc	Landrace x Yorkshire	Cross	Female	4 weeks	29838721	28107780	0.942	19564	0.613138	Hippocampus	Brain	Brain
SAMEA4434473	PRJEB12278	PAIRED	ILLUMINA	Illumina HiSeq 2500	Sus scrofa	Unknown	Yorkshire	European pigs	Female	Unknown	26668907	25140131	0.9427	18173	0.569544	Hippocampus	Brain	Brain
SAMEA4434474	PRJEB12278	PAIRED	ILLUMINA	Illumina HiSeq 2500	Sus scrofa	Unknown	Yorkshire	European pigs	Female	Unknown	25911491	24531666	0.9467	18442	0.577974	Hippocampus	Brain	Brain
SAMEA4434475	PRJEB12278	PAIRED	ILLUMINA	Illumina HiSeq 2500	Sus scrofa	Unknown	Yorkshire	European pigs	Female	Unknown	32451287	30671481	0.9452	19677	0.616679	Hippocampus	Brain	Brain
SAMEA4434476	PRJEB12278	PAIRED	ILLUMINA	Illumina HiSeq 2500	Sus scrofa	Unknown	Yorkshire	European pigs	Female	Unknown	29710476	28280263	0.9519	19253	0.603391	Hippocampus	Brain	Brain
SAMEA4434477	PRJEB12278	PAIRED	ILLUMINA	Illumina HiSeq 2500	Sus scrofa	Unknown	Yorkshire	European pigs	Female	Unknown	29940582	27990956	0.9349	19190	0.601417	Hippocampus	Brain	Brain
SAMEA4434478	PRJEB12278	PAIRED	ILLUMINA	Illumina HiSeq 2500	Sus scrofa	Unknown	Yorkshire	European pigs	Female	Unknown	33768633	31954653	0.9463	19759	0.619249	Hippocampus	Brain	Brain
SAMEA4434479	PRJEB12278	PAIRED	ILLUMINA	Illumina HiSeq 2500	Sus scrofa	Unknown	Yorkshire	European pigs	Female	Unknown	37375969	35625705	0.9532	19952	0.625298	Hippocampus	Brain	Brain
SAMEA3720870	PRJEB12300	PAIRED	ILLUMINA	Illumina HiSeq 2000	Sus scrofa	Unknown	Yorkshire	European pigs	Female	6 months	6717674	6407117	0.9538	13478	0.422402	Blood	Blood	Blood
SAMEA3720871	PRJEB12300	PAIRED	ILLUMINA	Illumina HiSeq 2000	Sus scrofa	Unknown	Yorkshire	European pigs	Female	6 months	21771302	20526091	0.9428	15124	0.473988	Blood	Blood	Blood
SAMEA3720872	PRJEB12300	PAIRED	ILLUMINA	Illumina HiSeq 2000	Sus scrofa	Unknown	Yorkshire	European pigs	Female	6 months	16624427	15827598	0.9521	14710	0.461013	Blood	Blood	Blood
SAMEA3720873	PRJEB12300	PAIRED	ILLUMINA	Illumina HiSeq 2000	Sus scrofa	Unknown	Yorkshire	European pigs	Female	6 months	16642732	15776778	0.948	14662	0.459509	Blood	Blood	Blood
SAMEA3720874	PRJEB12300	PAIRED	ILLUMINA	Illumina HiSeq 2000	Sus scrofa	Unknown	Yorkshire	European pigs	Female	6 months	15089531	14117203	0.9356	14691	0.460417	Blood	Blood	Blood
SAMEA3720875	PRJEB12300	PAIRED	ILLUMINA	Illumina HiSeq 2000	Sus scrofa	Unknown	Yorkshire	European pigs	Female	6 months	6383118	5989446	0.9383	13129	0.411464	Blood	Blood	Blood
SAMEA3720876	PRJEB12300	PAIRED	ILLUMINA	Illumina HiSeq 2000	Sus scrofa	Unknown	Yorkshire	European pigs	Female	6 months	23328448	21991218	0.9427	14319	0.448759	Blood	Blood	Blood
SAMEA3720877	PRJEB12300	PAIRED	ILLUMINA	Illumina HiSeq 2000	Sus scrofa	Unknown	Yorkshire	European pigs	Female	6 months	9652633	9033209	0.9358	13666	0.428294	Blood	Blood	Blood
SAMEA3720878	PRJEB12300	PAIRED	ILLUMINA	Illumina HiSeq 2000	Sus scrofa	Unknown	Yorkshire	European pigs	Female	6 months	7497298	7082641	0.9447	14433	0.452332	Blood	Blood	Blood
SAMEA3720879	PRJEB12300	PAIRED	ILLUMINA	Illumina HiSeq 2000	Sus scrofa	Unknown	Yorkshire	European pigs	Female	6 months	18136218	17135008	0.9448	15067	0.472201	Blood	Blood	Blood
SAMEA3720880	PRJEB12300	PAIRED	ILLUMINA	Illumina HiSeq 2000	Sus scrofa	Unknown	Yorkshire	European pigs	Female	6 months	17530138	16773572	0.9568	14671	0.459791	Blood	Blood	Blood
SAMEA3720881	PRJEB12300	PAIRED	ILLUMINA	Illumina HiSeq 2000	Sus scrofa	Unknown	Yorkshire	European pigs	Female	6 months	17437698	15816475	0.907	14315	0.448634	Blood	Blood	Blood
SAMEA3720882	PRJEB12300	PAIRED	ILLUMINA	Illumina HiSeq 2000	Sus scrofa	Unknown	Yorkshire	European pigs	Female	6 months	16514964	15025275	0.9098	14485	0.453961	Blood	Blood	Blood
SAMEA3720883	PRJEB12300	PAIRED	ILLUMINA	Illumina HiSeq 2000	Sus scrofa	Unknown	Yorkshire	European pigs	Female	6 months	13797302	12912803	0.9359	14445	0.452708	Blood	Blood	Blood
SAMEA3720884	PRJEB12300	PAIRED	ILLUMINA	Illumina HiSeq 2000	Sus scrofa	Unknown	Yorkshire	European pigs	Female	6 months	12509002	11574397	0.9253	14230	0.44597	Blood	Blood	Blood
SAMEA3720885	PRJEB12300	PAIRED	ILLUMINA	Illumina HiSeq 2000	Sus scrofa	Unknown	Yorkshire	European pigs	Female	6 months	24674443	23023982	0.9331	15507	0.485991	Blood	Blood	Blood
SAMEA3720886	PRJEB12300	PAIRED	ILLUMINA	Illumina HiSeq 2000	Sus scrofa	Unknown	Yorkshire	European pigs	Female	6 months	44323576	42253225	0.9533	16890	0.529334	Blood	Blood	Blood
SAMEA3720887	PRJEB12300	PAIRED	ILLUMINA	Illumina HiSeq 2000	Sus scrofa	Unknown	Yorkshire	European pigs	Female	6 months	18262813	17129063	0.9379	14786	0.463395	Blood	Blood	Blood
SAMEA3720888	PRJEB12300	PAIRED	ILLUMINA	Illumina HiSeq 2000	Sus scrofa	Unknown	Yorkshire	European pigs	Female	6 months	12719523	11777075	0.9259	14215	0.4455	Blood	Blood	Blood
SAMEA3720889	PRJEB12300	PAIRED	ILLUMINA	Illumina HiSeq 2000	Sus scrofa	Unknown	Yorkshire	European pigs	Female	6 months	15429439	13875730	0.8993	14048	0.440266	Blood	Blood	Blood
SAMEA3720890	PRJEB12300	PAIRED	ILLUMINA	Illumina HiSeq 2000	Sus scrofa	Unknown	Yorkshire	European pigs	Female	6 months	10115528	9317997	0.9212	13607	0.426445	Blood	Blood	Blood
SAMEA3720891	PRJEB12300	PAIRED	ILLUMINA	Illumina HiSeq 2000	Sus scrofa	Unknown	Yorkshire	European pigs	Female	6 months	15925255	14614684	0.9177	14578	0.456876	Blood	Blood	Blood
SAMEA3720892	PRJEB12300	PAIRED	ILLUMINA	Illumina HiSeq 2000	Sus scrofa	Unknown	Yorkshire	European pigs	Female	6 months	14963001	13531980	0.9044	14067	0.440861	Blood	Blood	Blood
SAMEA3720893	PRJEB12300	PAIRED	ILLUMINA	Illumina HiSeq 2000	Sus scrofa	Unknown	Yorkshire	European pigs	Female	6 months	13880005	12568665	0.9055	13954	0.43732	Blood	Blood	Blood
SAMEA3720894	PRJEB12300	PAIRED	ILLUMINA	Illumina HiSeq 2000	Sus scrofa	Unknown	Yorkshire	European pigs	Female	6 months	16819042	15574643	0.926	14504	0.454557	Blood	Blood	Blood
SAMEA3720895	PRJEB12300	PAIRED	ILLUMINA	Illumina HiSeq 2000	Sus scrofa	Unknown	Yorkshire	European pigs	Female	6 months	18706885	17567241	0.9391	14927	0.467814	Blood	Blood	Blood
SAMEA3720896	PRJEB12300	PAIRED	ILLUMINA	Illumina HiSeq 2000	Sus scrofa	Unknown	Yorkshire	European pigs	Female	6 months	29329627	27307404	0.9311	15538	0.486963	Blood	Blood	Blood
SAMEA3720897	PRJEB12300	PAIRED	ILLUMINA	Illumina HiSeq 2000	Sus scrofa	Unknown	Yorkshire	European pigs	Female	6 months	14463763	12943222	0.8949	14119	0.442491	Blood	Blood	Blood
SAMEA3720898	PRJEB12300	PAIRED	ILLUMINA	Illumina HiSeq 2000	Sus scrofa	Unknown	Yorkshire	European pigs	Female	6 months	14887364	13437213	0.9026	14092	0.441645	Blood	Blood	Blood
SAMEA3720899	PRJEB12300	PAIRED	ILLUMINA	Illumina HiSeq 2000	Sus scrofa	Unknown	Yorkshire	European pigs	Female	6 months	24016830	22847827	0.9513	15694	0.491852	Blood	Blood	Blood
SAMEA3720900	PRJEB12300	PAIRED	ILLUMINA	Illumina HiSeq 2000	Sus scrofa	Unknown	Yorkshire	European pigs	Female	6 months	12986959	11720931	0.9025	13920	0.436254	Blood	Blood	Blood
SAMEA3727375	PRJEB12435	PAIRED	ILLUMINA	Illumina HiSeq 2000	Sus scrofa	Yorkshire	Yorkshire	European pigs	Female	91 days	22868879	21692473	0.9486	16464	0.515983	Synovial membrane	Synovial membrane	Synovial membrane
SAMEA3727376	PRJEB12435	PAIRED	ILLUMINA	Illumina HiSeq 2000	Sus scrofa	Yorkshire	Yorkshire	European pigs	Female	91 days	23029160	22017520	0.9561	15403	0.482732	Synovial membrane	Synovial membrane	Synovial membrane
SAMEA3727377	PRJEB12435	PAIRED	ILLUMINA	Illumina HiSeq 2000	Sus scrofa	Yorkshire	Landrace x Yorkshire	Cross	Female	86 days	18287101	17620385	0.9635	14809	0.464116	Synovial membrane	Synovial membrane	Synovial membrane
SAMEA3727378	PRJEB12435	PAIRED	ILLUMINA	Illumina HiSeq 2000	Sus scrofa	Yorkshire	Yorkshire	European pigs	Female	91 days	18686194	17845192	0.955	15420	0.483264	Synovial membrane	Synovial membrane	Synovial membrane
SAMEA3727379	PRJEB12435	PAIRED	ILLUMINA	Illumina HiSeq 2000	Sus scrofa	Yorkshire	Yorkshire	European pigs	Female	83 days	19826918	18880403	0.9523	14800	0.463834	Synovial membrane	Synovial membrane	Synovial membrane
SAMEA3727380	PRJEB12435	PAIRED	ILLUMINA	Illumina HiSeq 2000	Sus scrofa	Yorkshire	Landrace x Yorkshire	Cross	Female	89 days	21255984	20280929	0.9541	14717	0.461232	Synovial membrane	Synovial membrane	Synovial membrane
SAMEA3727381	PRJEB12435	PAIRED	ILLUMINA	Illumina HiSeq 2000	Sus scrofa	Yorkshire	Yorkshire	European pigs	Female	109 days	26378182	25650866	0.9724	15058	0.471919	Synovial membrane	Synovial membrane	Synovial membrane
SAMEA3727382	PRJEB12435	PAIRED	ILLUMINA	Illumina HiSeq 2000	Sus scrofa	Yorkshire	Yorkshire	European pigs	Female	110 days	29971524	27884938	0.9304	16422	0.514667	Synovial membrane	Synovial membrane	Synovial membrane
SAMEA3727383	PRJEB12435	PAIRED	ILLUMINA	Illumina HiSeq 2000	Sus scrofa	Yorkshire	Landrace x Yorkshire	Cross	Female	102 days	20682885	19901001	0.9622	16116	0.505077	Synovial membrane	Synovial membrane	Synovial membrane
SAMEA3727384	PRJEB12435	PAIRED	ILLUMINA	Illumina HiSeq 2000	Sus scrofa	Yorkshire	Landrace x Yorkshire	Cross	Female	103 days	18823526	18083323	0.9607	15559	0.487621	Synovial membrane	Synovial membrane	Synovial membrane
SAMEA3727385	PRJEB12435	PAIRED	ILLUMINA	Illumina HiSeq 2000	Sus scrofa	Yorkshire	Yorkshire	European pigs	Female	100 days	24749000	23932836	0.967	16031	0.502413	Synovial membrane	Synovial membrane	Synovial membrane
SAMEA3727386	PRJEB12435	PAIRED	ILLUMINA	Illumina HiSeq 2000	Sus scrofa	Yorkshire	Yorkshire	European pigs	Female	103 days	21977515	20758117	0.9445	15355	0.481227	Synovial membrane	Synovial membrane	Synovial membrane
SAMEA3727387	PRJEB12435	PAIRED	ILLUMINA	Illumina HiSeq 2000	Sus scrofa	Yorkshire	Yorkshire	European pigs	Female	100 days	15348649	14732429	0.9599	15007	0.470321	Synovial membrane	Synovial membrane	Synovial membrane
SAMEA3727388	PRJEB12435	PAIRED	ILLUMINA	Illumina HiSeq 2000	Sus scrofa	Yorkshire	Yorkshire	European pigs	Female	100 days	19589522	18713299	0.9553	15279	0.478845	Synovial membrane	Synovial membrane	Synovial membrane
SAMEA3727389	PRJEB12435	PAIRED	ILLUMINA	Illumina HiSeq 2000	Sus scrofa	Yorkshire	Yorkshire	European pigs	Female	100 days	23486344	22518502	0.9588	15341	0.480789	Synovial membrane	Synovial membrane	Synovial membrane
SAMEA3727390	PRJEB12435	PAIRED	ILLUMINA	Illumina HiSeq 2000	Sus scrofa	Yorkshire	Landrace x Yorkshire	Cross	Female	104 days	17210286	16479830	0.9576	15667	0.491005	Synovial membrane	Synovial membrane	Synovial membrane
SAMEA3727391	PRJEB12435	PAIRED	ILLUMINA	Illumina HiSeq 2000	Sus scrofa	Yorkshire	Landrace x Yorkshire	Cross	Female	104 days	21429255	20599271	0.9613	15564	0.487777	Synovial membrane	Synovial membrane	Synovial membrane
SAMEA3727392	PRJEB12435	PAIRED	ILLUMINA	Illumina HiSeq 2000	Sus scrofa	Yorkshire	Landrace x Yorkshire	Cross	Female	104 days	20798019	20110484	0.9669	15735	0.493137	Synovial membrane	Synovial membrane	Synovial membrane
SAMEA3903326	PRJEB13074	PAIRED	ILLUMINA	Illumina HiSeq 2000	Sus scrofa	Unknown	Chinese Wuzhishan	Asian pigs	Male	Unknown	45875177	29301208	0.6387	18109	0.567538	Liver	Liver	Liver
SAMEA3903386	PRJEB13074	PAIRED	ILLUMINA	Illumina HiSeq 2000	Sus scrofa	Unknown	Chinese Wuzhishan	Asian pigs	Male	Unknown	43525084	33250640	0.7639	19735	0.618497	Liver	Liver	Liver
SAMEA3903387	PRJEB13074	PAIRED	ILLUMINA	Illumina HiSeq 2000	Sus scrofa	Unknown	Bama Xiang	Asian pigs	Male	Unknown	29301746	20879913	0.7126	17897	0.560894	Liver	Liver	Liver
SAMEA4454572	PRJEB14330	PAIRED	ILLUMINA	Illumina HiSeq 3000	Sus scrofa	Unknown	Unknown	Unknown	Unknown	6 months	35995035	34208202	0.9504	19393	0.607779	Cerebral cortex	Brain	Brain	Embargoed
SAMEA4454574	PRJEB14330	PAIRED	ILLUMINA	Illumina HiSeq 3000	Sus scrofa	Unknown	Unknown	Unknown	Unknown	6 months	40635090	37407913	0.9206	19860	0.622414	Cerebral cortex	Brain	Brain	Embargoed
SAMEA4454575	PRJEB14330	PAIRED	ILLUMINA	Illumina HiSeq 3000	Sus scrofa	Unknown	Unknown	Unknown	Unknown	6 months	30622879	28872506	0.9428	18842	0.59051	Spleen	Spleen	Spleen	Embargoed
SAMEA4454576	PRJEB14330	PAIRED	ILLUMINA	Illumina HiSeq 3000	Sus scrofa	Unknown	Unknown	Unknown	Unknown	6 months	47521205	44574754	0.938	19772	0.619657	Spleen	Spleen	Spleen	Embargoed
SAMEA4454578	PRJEB14330	PAIRED	ILLUMINA	Illumina HiSeq 3000	Sus scrofa	Unknown	Unknown	Unknown	Unknown	6 months	27131143	25208138	0.9291	14756	0.462455	Liver	Liver	Liver	Embargoed
SAMEA4454580	PRJEB14330	PAIRED	ILLUMINA	Illumina HiSeq 3000	Sus scrofa	Unknown	Unknown	Unknown	Unknown	6 months	38354729	36384814	0.9486	18526	0.580607	Hypothalamus	Brain	Hypothalamus	Embargoed
SAMEA4454582	PRJEB14330	PAIRED	ILLUMINA	Illumina HiSeq 3000	Sus scrofa	Unknown	Unknown	Unknown	Unknown	6 months	51225613	48979761	0.9562	19990	0.626489	Cerebellum	Brain	Brain	Embargoed
SAMEA4454583	PRJEB14330	PAIRED	ILLUMINA	Illumina HiSeq 3000	Sus scrofa	Unknown	Unknown	Unknown	Unknown	6 months	39565401	36810278	0.9304	16195	0.507553	Muscle	Muscle	Muscle	Embargoed
SAMEA4454594	PRJEB14330	PAIRED	ILLUMINA	Illumina HiSeq 3000	Sus scrofa	Unknown	Unknown	Unknown	Unknown	6 months	33278543	31500828	0.9466	17718	0.555284	Adipose	Adipose	Adipose	Embargoed
SAMEA4454597	PRJEB14330	PAIRED	ILLUMINA	Illumina HiSeq 3000	Sus scrofa	Unknown	Unknown	Unknown	Unknown	6 months	41504609	39619631	0.9546	18160	0.569136	Adipose	Adipose	Adipose	Embargoed
SAMEA4454608	PRJEB14330	PAIRED	ILLUMINA	Illumina HiSeq 3000	Sus scrofa	Unknown	Unknown	Unknown	Unknown	6 months	62737119	59839573	0.9538	20380	0.638711	Lung	Lung	Lung	Embargoed
SAMEA4454609	PRJEB14330	PAIRED	ILLUMINA	Illumina HiSeq 3000	Sus scrofa	Unknown	Unknown	Unknown	Unknown	6 months	41045636	39389041	0.9596	19181	0.601135	Cerebellum	Brain	Brain	Embargoed
SAMEA4454611	PRJEB14330	PAIRED	ILLUMINA	Illumina HiSeq 3000	Sus scrofa	Unknown	Unknown	Unknown	Unknown	6 months	41799419	39832974	0.953	19553	0.612793	Hypothalamus	Brain	Hypothalamus	Embargoed
SAMEA4454612	PRJEB14330	PAIRED	ILLUMINA	Illumina HiSeq 3000	Sus scrofa	Unknown	Unknown	Unknown	Unknown	6 months	36345171	34060938	0.9372	15510	0.486085	Liver	Liver	Liver	Embargoed
SAMEA4454613	PRJEB14330	PAIRED	ILLUMINA	Illumina HiSeq 3000	Sus scrofa	Unknown	Unknown	Unknown	Unknown	6 months	55152290	51985919	0.9426	16443	0.515325	Muscle	Muscle	Muscle	Embargoed
SAMEA4454614	PRJEB14330	PAIRED	ILLUMINA	Illumina HiSeq 3000	Sus scrofa	Unknown	Unknown	Unknown	Unknown	6 months	59030061	56433706	0.956	20766	0.650809	Lung	Lung	Lung	Embargoed
SAMEA4436896	PRJEB15381	PAIRED	ILLUMINA	Illumina HiSeq 2500	Sus scrofa	Unknown	Yorkshire	European pigs	Female	Unknown	18824313	17797982	0.9455	13801	0.432525	Blood dendritic cell	Blood	Blood
SAMEA4436897	PRJEB15381	PAIRED	ILLUMINA	Illumina HiSeq 2500	Sus scrofa	Unknown	Yorkshire	European pigs	Female	Unknown	21215482	20261080	0.955	14044	0.44014	Blood dendritic cell	Blood	Blood
SAMEA4436898	PRJEB15381	PAIRED	ILLUMINA	Illumina HiSeq 2500	Sus scrofa	Unknown	Yorkshire	European pigs	Female	Unknown	19454995	18359700	0.9437	13961	0.437539	Blood dendritic cell	Blood	Blood
SAMEA4436899	PRJEB15381	PAIRED	ILLUMINA	Illumina HiSeq 2500	Sus scrofa	Unknown	Yorkshire	European pigs	Female	Unknown	21217140	19924654	0.9391	14444	0.452676	Blood dendritic cell	Blood	Blood
SAMEA4436900	PRJEB15381	PAIRED	ILLUMINA	Illumina HiSeq 2500	Sus scrofa	Unknown	Yorkshire	European pigs	Female	Unknown	21142340	19560682	0.9252	14191	0.444747	Blood dendritic cell	Blood	Blood
SAMEA4436901	PRJEB15381	PAIRED	ILLUMINA	Illumina HiSeq 2500	Sus scrofa	Unknown	Yorkshire	European pigs	Female	Unknown	25343667	23928341	0.9442	15105	0.473392	Blood dendritic cell	Blood	Blood
SAMEA4436902	PRJEB15381	PAIRED	ILLUMINA	Illumina HiSeq 2500	Sus scrofa	Unknown	Yorkshire	European pigs	Female	Unknown	24146892	22948459	0.9504	14231	0.446001	Blood dendritic cell	Blood	Blood
SAMEA4436903	PRJEB15381	PAIRED	ILLUMINA	Illumina HiSeq 2500	Sus scrofa	Unknown	Yorkshire	European pigs	Female	Unknown	15388397	14482738	0.9411	13598	0.426163	Blood dendritic cell	Blood	Blood
SAMEA4436904	PRJEB15381	PAIRED	ILLUMINA	Illumina HiSeq 2500	Sus scrofa	Unknown	Yorkshire	European pigs	Female	Unknown	19086591	17849560	0.9352	14142	0.443212	Blood dendritic cell	Blood	Blood
SAMEA4436905	PRJEB15381	PAIRED	ILLUMINA	Illumina HiSeq 2500	Sus scrofa	Unknown	Yorkshire	European pigs	Female	Unknown	25915815	24221541	0.9346	15762	0.493983	Blood dendritic cell	Blood	Blood
SAMEA4436906	PRJEB15381	PAIRED	ILLUMINA	Illumina HiSeq 2500	Sus scrofa	Unknown	Yorkshire	European pigs	Female	Unknown	25283402	23550031	0.9314	14689	0.460355	Blood dendritic cell	Blood	Blood
SAMEA4436907	PRJEB15381	PAIRED	ILLUMINA	Illumina HiSeq 2500	Sus scrofa	Unknown	Yorkshire	European pigs	Female	Unknown	21434426	19997868	0.933	14278	0.447474	Blood dendritic cell	Blood	Blood
SAMEA4436908	PRJEB15381	PAIRED	ILLUMINA	Illumina HiSeq 2500	Sus scrofa	Unknown	Yorkshire	European pigs	Female	Unknown	26298367	25075701	0.9535	14602	0.457628	Blood dendritic cell	Blood	Blood
SAMEA4436909	PRJEB15381	PAIRED	ILLUMINA	Illumina HiSeq 2500	Sus scrofa	Unknown	Yorkshire	European pigs	Female	Unknown	29570639	28089079	0.9499	15524	0.486524	Blood dendritic cell	Blood	Blood
SAMEA4436910	PRJEB15381	PAIRED	ILLUMINA	Illumina HiSeq 2500	Sus scrofa	Unknown	Yorkshire	European pigs	Female	Unknown	28552039	26951138	0.9439	14723	0.46142	Blood dendritic cell	Blood	Blood
SAMEA4504148	PRJEB16134	SINGLE	ILLUMINA	Illumina HiSeq 2500	Sus scrofa	unknown	Unknown	Unknown	Unknown	Unknown	0	0	0	0	0	Unknown	Unknown	Unknown
SAMEA4504149	PRJEB16134	SINGLE	ILLUMINA	Illumina HiSeq 2500	Sus scrofa	Unknown	Unknown	Unknown	Unknown	Unknown	0	0	0	0	0	Unknown	Unknown	Unknown
SAMEA4504150	PRJEB16134	SINGLE	ILLUMINA	Illumina HiSeq 2500	Sus scrofa	Unknown	Unknown	Unknown	Unknown	Unknown	0	0	0	0	0	Unknown	Unknown	Unknown
SAMEA4504151	PRJEB16134	SINGLE	ILLUMINA	Illumina HiSeq 2500	Sus scrofa	Unknown	Unknown	Unknown	Unknown	Unknown	0	0	0	0	0	Unknown	Unknown	Unknown
SAMEA4504152	PRJEB16134	SINGLE	ILLUMINA	Illumina HiSeq 2500	Sus scrofa	Unknown	Unknown	Unknown	Unknown	Unknown	0	0	0	0	0	Unknown	Unknown	Unknown
SAMEA4504153	PRJEB16134	SINGLE	ILLUMINA	Illumina HiSeq 2500	Sus scrofa	Unknown	Unknown	Unknown	Unknown	Unknown	0	0	0	0	0	Unknown	Unknown	Unknown
SAMEA4504154	PRJEB16134	SINGLE	ILLUMINA	Illumina HiSeq 2500	Sus scrofa	Unknown	Unknown	Unknown	Unknown	Unknown	0	0	0	0	0	Unknown	Unknown	Unknown
SAMEA4504155	PRJEB16134	SINGLE	ILLUMINA	Illumina HiSeq 2500	Sus scrofa	unknown	Unknown	Unknown	Unknown	Unknown	0	0	0	0	0	Unknown	Unknown	Unknown
SAMEA4504156	PRJEB16134	SINGLE	ILLUMINA	Illumina HiSeq 2500	Sus scrofa	unknown	Unknown	Unknown	Unknown	Unknown	0	0	0	0	0	Unknown	Unknown	Unknown
SAMEA4504157	PRJEB16134	SINGLE	ILLUMINA	Illumina HiSeq 2500	Sus scrofa	unknown	Unknown	Unknown	Unknown	Unknown	0	0	0	0	0	Unknown	Unknown	Unknown
SAMEA4504158	PRJEB16134	SINGLE	ILLUMINA	Illumina HiSeq 2500	Sus scrofa	Unknown	Unknown	Unknown	Unknown	Unknown	0	0	0	0	0	Unknown	Unknown	Unknown
SAMEA4504159	PRJEB16134	SINGLE	ILLUMINA	Illumina HiSeq 2500	Sus scrofa	Unknown	Unknown	Unknown	Unknown	Unknown	0	0	0	0	0	Unknown	Unknown	Unknown
SAMEA4504160	PRJEB16134	SINGLE	ILLUMINA	Illumina HiSeq 2500	Sus scrofa	Unknown	Unknown	Unknown	Unknown	Unknown	0	0	0	0	0	Unknown	Unknown	Unknown
SAMEA4504161	PRJEB16134	SINGLE	ILLUMINA	Illumina HiSeq 2500	Sus scrofa	Unknown	Unknown	Unknown	Unknown	Unknown	0	0	0	0	0	Unknown	Unknown	Unknown
SAMEA4504162	PRJEB16134	SINGLE	ILLUMINA	Illumina HiSeq 2500	Sus scrofa	Unknown	Unknown	Unknown	Unknown	Unknown	0	0	0	0	0	Unknown	Unknown	Unknown
SAMEA4504163	PRJEB16134	SINGLE	ILLUMINA	Illumina HiSeq 2500	Sus scrofa	Unknown	Unknown	Unknown	Unknown	Unknown	0	0	0	0	0	Unknown	Unknown	Unknown
SAMEA4504164	PRJEB16134	SINGLE	ILLUMINA	Illumina HiSeq 2500	Sus scrofa	unknown	Unknown	Unknown	Unknown	Unknown	0	0	0	0	0	Unknown	Unknown	Unknown
SAMEA4504165	PRJEB16134	SINGLE	ILLUMINA	Illumina HiSeq 2500	Sus scrofa	unknown	Unknown	Unknown	Unknown	Unknown	0	0	0	0	0	Unknown	Unknown	Unknown
SAMEA4504166	PRJEB16134	SINGLE	ILLUMINA	Illumina HiSeq 2500	Sus scrofa	unknown	Unknown	Unknown	Unknown	Unknown	0	0	0	0	0	Unknown	Unknown	Unknown
SAMEA4504167	PRJEB16134	SINGLE	ILLUMINA	Illumina HiSeq 2500	Sus scrofa	Unknown	Unknown	Unknown	Unknown	Unknown	0	0	0	0	0	Unknown	Unknown	Unknown
SAMEA4504168	PRJEB16134	SINGLE	ILLUMINA	Illumina HiSeq 2500	Sus scrofa	Unknown	Unknown	Unknown	Unknown	Unknown	0	0	0	0	0	Unknown	Unknown	Unknown
SAMEA4504169	PRJEB16134	SINGLE	ILLUMINA	Illumina HiSeq 2500	Sus scrofa	unknown	Unknown	Unknown	Unknown	Unknown	0	0	0	0	0	Unknown	Unknown	Unknown
SAMEA4504170	PRJEB16134	PAIRED	ILLUMINA	Illumina MiSeq	Sus scrofa	unknown	Unknown	Unknown	Unknown	Unknown	0	0	0	0	0	Unknown	Unknown	Unknown
SAMEA4504171	PRJEB16134	SINGLE	ILLUMINA	Illumina HiSeq 2500	Sus scrofa	unknown	Unknown	Unknown	Unknown	Unknown	0	0	0	0	0	Unknown	Unknown	Unknown
SAMEA4504209	PRJEB16134	SINGLE	ILLUMINA	Illumina HiSeq 2500	Sus scrofa	Unknown	Unknown	Unknown	Unknown	Unknown	0	0	0	0	0	Unknown	Unknown	Unknown
SAMEA72277168	PRJEB19268	PAIRED	ILLUMINA	Illumina HiSeq 2000	Sus scrofa	Duroc	Duroc x Pietrain	Cross	Unknown	Unknown	36953933	35277023	0.9546	16130	0.505516	Liver	Liver	Liver
SAMEA72277918	PRJEB19268	PAIRED	ILLUMINA	Illumina HiSeq 2000	Sus scrofa	Duroc	Duroc x Pietrain	Cross	Unknown	Unknown	29120800	25476171	0.8748	17615	0.552056	Spleen	Spleen	Spleen
SAMEA72278668	PRJEB19268	PAIRED	ILLUMINA	Illumina HiSeq 2000	Sus scrofa	Duroc	Duroc x Pietrain	Cross	Unknown	Unknown	33959341	29381336	0.8652	22071	0.691707	Testis	Testis	Testis
SAMEA72279418	PRJEB19268	PAIRED	ILLUMINA	Illumina HiSeq 2000	Sus scrofa	Duroc	Duroc x Pietrain	Cross	Unknown	Unknown	40029118	38598698	0.9643	18644	0.584305	Frontal lobe	Brain	Brain
SAMEA72280168	PRJEB19268	PAIRED	ILLUMINA	Illumina HiSeq 2000	Sus scrofa	Duroc	Landrace x Yorkshire	Cross	Unknown	Unknown	38603648	33310840	0.8629	19023	0.596183	Muscle	Muscle	Muscle
SAMEA72280918	PRJEB19268	PAIRED	ILLUMINA	Illumina HiSeq 2000	Sus scrofa	Duroc	Duroc x Pietrain	Cross	Unknown	Unknown	35173079	33963257	0.9656	14869	0.465996	Liver	Liver	Liver
SAMEA72281668	PRJEB19268	PAIRED	ILLUMINA	Illumina HiSeq 2000	Sus scrofa	Duroc	Landrace x Yorkshire	Cross	Unknown	Unknown	38377821	34693346	0.904	16463	0.515952	Spleen	Spleen	Spleen
SAMEA72282418	PRJEB19268	PAIRED	ILLUMINA	Illumina HiSeq 2000	Sus scrofa	Duroc	Landrace x Yorkshire	Cross	Unknown	Unknown	36946044	32393387	0.8768	17999	0.564091	Testis	Testis	Testis
SAMEA72283168	PRJEB19268	PAIRED	ILLUMINA	Illumina HiSeq 2000	Sus scrofa	Duroc	Landrace x Yorkshire	Cross	Unknown	Unknown	28270072	27090823	0.9583	18703	0.586154	Frontal lobe	Brain	Brain
SAMEA72283918	PRJEB19268	PAIRED	ILLUMINA	Illumina HiSeq 2000	Sus scrofa	Duroc	Landrace x Yorkshire	Cross	Unknown	Unknown	38103112	36402869	0.9554	14738	0.46189	Muscle	Muscle	Muscle
SAMEA72284668	PRJEB19268	PAIRED	ILLUMINA	Illumina HiSeq 2000	Sus scrofa	Duroc	Yorkshire	European pigs	Unknown	Unknown	37001646	34666643	0.9369	17007	0.533001	Liver	Liver	Liver
SAMEA72285418	PRJEB19268	PAIRED	ILLUMINA	Illumina HiSeq 2000	Sus scrofa	Duroc	Yorkshire	European pigs	Unknown	Unknown	32344419	28903270	0.8936	18516	0.580293	Spleen	Spleen	Spleen
SAMEA72286168	PRJEB19268	PAIRED	ILLUMINA	Illumina HiSeq 2000	Sus scrofa	Duroc	Yorkshire	European pigs	Unknown	Unknown	39281361	36024439	0.9171	22768	0.713551	Testis	Testis	Testis
SAMEA72286918	PRJEB19268	PAIRED	ILLUMINA	Illumina HiSeq 2000	Sus scrofa	Duroc	Yorkshire	European pigs	Unknown	Unknown	39629537	38233329	0.9648	19186	0.601291	Frontal lobe	Brain	Brain
SAMEA72287668	PRJEB19268	PAIRED	ILLUMINA	Illumina HiSeq 2000	Sus scrofa	Duroc	Yorkshire	European pigs	Unknown	Unknown	39495279	37911051	0.9599	15667	0.491005	Muscle	Muscle	Muscle
SAMEA72288418	PRJEB19268	PAIRED	ILLUMINA	Illumina HiSeq 2000	Sus scrofa	Duroc	Unknown	Unknown	Unknown	Unknown	36503206	35451914	0.9712	19670	0.61646	Olfactory lobe	Other	Other	Outlier
SAMEA72289168	PRJEB19268	PAIRED	ILLUMINA	Illumina HiSeq 2000	Sus scrofa	Duroc	Yorkshire	European pigs	Unknown	Unknown	44376396	42263366	0.9524	19804	0.620659	Lung	Lung	Lung
SAMEA72289918	PRJEB19268	PAIRED	ILLUMINA	Illumina HiSeq 2000	Sus scrofa	Duroc	Yorkshire	European pigs	Unknown	Unknown	34128825	32741588	0.9594	19326	0.605679	Lymph node	Lymph node	Lymph node
SAMEA103886111	PRJEB19386	PAIRED	ILLUMINA	Illumina HiSeq 2500	Sus scrofa	Unknown	Unknown	Unknown	Unknown	5 months	32674308	30197925	0.9242	21153	0.662937	Stomach	Other	Other	Embargoed
SAMEA103886112	PRJEB19386	PAIRED	ILLUMINA	Illumina HiSeq 2500	Sus scrofa	Unknown	Unknown	Unknown	Unknown	Unknown	49800942	20170873	0.405	12929	0.405196	Unknown	Unknown	Unknown
SAMEA103886114	PRJEB19386	PAIRED	ILLUMINA	Illumina HiSeq 2500	Sus scrofa	Unknown	Unknown	Unknown	Unknown	5 months	30641282	27698947	0.904	22210	0.696064	Hippocampus	Brain	Hippocampus	Embargoed
SAMEA103886115	PRJEB19386	PAIRED	ILLUMINA	Illumina HiSeq 2500	Sus scrofa	Unknown	Unknown	Unknown	Unknown	5 months	71216560	62723476	0.8807	22899	0.717657	Lymph node	Lymph node	Lymph node	Embargoed
SAMEA103886116	PRJEB19386	PAIRED	ILLUMINA	Illumina HiSeq 2500	Sus scrofa	Unknown	Unknown	Unknown	Unknown	5 months	30277445	28399484	0.938	21862	0.685157	Cerebellum	Brain	Brain	Embargoed
SAMEA103886118	PRJEB19386	PAIRED	ILLUMINA	Illumina HiSeq 2500	Sus scrofa	Unknown	Unknown	Unknown	Unknown	5 months	37440667	33077788	0.8835	19162	0.600539	Muscle	Muscle	Muscle	Embargoed
SAMEA103886120	PRJEB19386	PAIRED	ILLUMINA	Illumina HiSeq 2500	Sus scrofa	Unknown	Unknown	Unknown	Unknown	5 months	48514089	42675792	0.8797	21647	0.678419	Caecum	Large intestine	Caecum	Embargoed
SAMEA103886121	PRJEB19386	PAIRED	ILLUMINA	Illumina HiSeq 2500	Sus scrofa	Unknown	Unknown	Unknown	Unknown	5 months	38263798	35204147	0.92	21910	0.686662	Ileum	Small intestine	Ileum	Embargoed
SAMEA103886122	PRJEB19386	PAIRED	ILLUMINA	Illumina HiSeq 2500	Sus scrofa	Unknown	Unknown	Unknown	Unknown	5 months	28483549	26491078	0.93	22637	0.709446	Hippocampus	Brain	Hippocampus	Embargoed
SAMEA103886124	PRJEB19386	PAIRED	ILLUMINA	Illumina HiSeq 2500	Sus scrofa	Unknown	Unknown	Unknown	Unknown	Unknown	45101813	37920604	0.8408	17829	0.558763	Macrophage	Blood	Macrophage	Embargoed
SAMEA103886125	PRJEB19386	PAIRED	ILLUMINA	Illumina HiSeq 2500	Sus scrofa	Unknown	Unknown	Unknown	Unknown	5 months	135157206	113036242	0.8363	25580	0.80168	Tonsil	Other	Other	Embargoed
SAMEA103886126	PRJEB19386	PAIRED	ILLUMINA	Illumina HiSeq 2500	Sus scrofa	Unknown	Unknown	Unknown	Unknown	5 months	30831072	26568375	0.8617	21704	0.680206	Uterus	Uterus	Uterus	Embargoed
SAMEA103886127	PRJEB19386	PAIRED	ILLUMINA	Illumina HiSeq 2500	Sus scrofa	Unknown	Unknown	Unknown	Unknown	5 months	109083921	91713044	0.8408	23802	0.745957	Lymph node	Lymph node	Lymph node	Embargoed
SAMEA103886128	PRJEB19386	PAIRED	ILLUMINA	Illumina HiSeq 2500	Sus scrofa	Unknown	Unknown	Unknown	Unknown	5 months	17348112	15853060	0.9138	20755	0.650464	Brainstem	Brain	Brain	Embargoed
SAMEA103886129	PRJEB19386	PAIRED	ILLUMINA	Illumina HiSeq 2500	Sus scrofa	Unknown	Unknown	Unknown	Unknown	5 months	26893263	24757265	0.9206	21738	0.681271	Brainstem	Brain	Brain	Embargoed
SAMEA103886131	PRJEB19386	PAIRED	ILLUMINA	Illumina HiSeq 2500	Sus scrofa	Unknown	Unknown	Unknown	Unknown	5 months	25729095	23214811	0.9023	20938	0.656199	Cerebellum	Brain	Brain	Embargoed
SAMEA103886132	PRJEB19386	PAIRED	ILLUMINA	Illumina HiSeq 2500	Sus scrofa	Unknown	Unknown	Unknown	Unknown	5 months	27678662	24215681	0.8749	19985	0.626332	Colon	Large intestine	Colon	Embargoed
SAMEA103886133	PRJEB19386	PAIRED	ILLUMINA	Illumina HiSeq 2500	Sus scrofa	Unknown	Unknown	Unknown	Unknown	5 months	104626413	90907935	0.8689	23540	0.737746	Caecum	Large intestine	Caecum	Embargoed
SAMEA103886134	PRJEB19386	PAIRED	ILLUMINA	Illumina HiSeq 2500	Sus scrofa	Unknown	Unknown	Unknown	Unknown	5 months	22542785	19834829	0.8799	20186	0.632631	Stomach	Other	Other	Embargoed
SAMEA103886135	PRJEB19386	PAIRED	ILLUMINA	Illumina HiSeq 2500	Sus scrofa	Unknown	Unknown	Unknown	Unknown	5 months	21830197	20023043	0.9172	21598	0.676884	Medulla oblongata	Other	Other	Embargoed
SAMEA103886136	PRJEB19386	PAIRED	ILLUMINA	Illumina HiSeq 2500	Sus scrofa	Unknown	Unknown	Unknown	Unknown	5 months	35168045	32808280	0.9329	22698	0.711358	Thalamus	Brain	Thalamus	Embargoed
SAMEA103886137	PRJEB19386	PAIRED	ILLUMINA	Illumina HiSeq 2500	Sus scrofa	Unknown	Unknown	Unknown	Unknown	Unknown	43696649	38526613	0.8817	17797	0.55776	Macrophage	Blood	Macrophage	Embargoed
SAMEA103886139	PRJEB19386	PAIRED	ILLUMINA	Illumina HiSeq 2500	Sus scrofa	Unknown	Unknown	Unknown	Unknown	5 months	19963693	18504287	0.9269	21285	0.667074	Frontal cortex	Brain	Frontal cortex	Embargoed
SAMEA103886140	PRJEB19386	PAIRED	ILLUMINA	Illumina HiSeq 2500	Sus scrofa	Unknown	Unknown	Unknown	Unknown	5 months	75164401	65360302	0.8696	24109	0.755579	Epididymis	Other	Other	Embargoed
SAMEA103886142	PRJEB19386	PAIRED	ILLUMINA	Illumina HiSeq 2500	Sus scrofa	Unknown	Unknown	Unknown	Unknown	5 months	26545382	23785186	0.896	21491	0.67353	Medulla oblongata	Other	Other	Embargoed
SAMEA103886145	PRJEB19386	PAIRED	ILLUMINA	Illumina HiSeq 2500	Sus scrofa	Unknown	Unknown	Unknown	Unknown	5 months	42343146	36765663	0.8683	21728	0.680958	Omentum	Other	Other	Embargoed
SAMEA103886146	PRJEB19386	PAIRED	ILLUMINA	Illumina HiSeq 2500	Sus scrofa	Unknown	Unknown	Unknown	Unknown	5 months	42433618	36589980	0.8623	21687	0.679673	Omentum	Other	Other	Embargoed
SAMEA103886147	PRJEB19386	PAIRED	ILLUMINA	Illumina HiSeq 2500	Sus scrofa	Unknown	Unknown	Unknown	Unknown	5 months	31823363	28205414	0.8863	20767	0.65084	Colon	Large intestine	Colon	Embargoed
SAMEA103886149	PRJEB19386	PAIRED	ILLUMINA	Illumina HiSeq 2500	Sus scrofa	Unknown	Unknown	Unknown	Unknown	5 months	61680594	54063472	0.8765	23978	0.751473	Pituitary	Brain	Pituitary	Embargoed
SAMEA103886150	PRJEB19386	PAIRED	ILLUMINA	Illumina HiSeq 2500	Sus scrofa	Unknown	Unknown	Unknown	Unknown	5 months	40372363	36399517	0.9016	23285	0.729754	Pituitary	Brain	Pituitary	Embargoed
SAMEA103886151	PRJEB19386	PAIRED	ILLUMINA	Illumina HiSeq 2500	Sus scrofa	Unknown	Unknown	Unknown	Unknown	5 months	30777825	26742499	0.8689	21303	0.667638	Caecum	Large intestine	Caecum	Embargoed
SAMEA103886152	PRJEB19386	PAIRED	ILLUMINA	Illumina HiSeq 2500	Sus scrofa	Unknown	Unknown	Unknown	Unknown	5 months	17898943	15819489	0.8838	21044	0.659521	Pituitary	Brain	Pituitary	Embargoed
SAMEA103886153	PRJEB19386	PAIRED	ILLUMINA	Illumina HiSeq 2500	Sus scrofa	Unknown	Unknown	Unknown	Unknown	5 months	62197639	56537889	0.909	21899	0.686317	Kidney	Kidney	Kidney	Embargoed
SAMEA103886154	PRJEB19386	PAIRED	ILLUMINA	Illumina HiSeq 2500	Sus scrofa	Unknown	Unknown	Unknown	Unknown	5 months	25589842	23693212	0.9259	22232	0.696753	Corpus callosum	Brain	Corpus callosum	Embargoed
SAMEA103886155	PRJEB19386	PAIRED	ILLUMINA	Illumina HiSeq 2500	Sus scrofa	Unknown	Unknown	Unknown	Unknown	5 months	16529565	14356441	0.8685	19383	0.607465	Duodenum	Small intestine	Duodenum	Embargoed
SAMEA103886156	PRJEB19386	PAIRED	ILLUMINA	Illumina HiSeq 2500	Sus scrofa	Unknown	Unknown	Unknown	Unknown	5 months	21285637	19463778	0.9144	21380	0.670051	Frontal cortex	Brain	Frontal cortex	Embargoed
SAMEA103886157	PRJEB19386	PAIRED	ILLUMINA	Illumina HiSeq 2500	Sus scrofa	Unknown	Unknown	Unknown	Unknown	5 months	52753721	48553063	0.9204	22654	0.709979	Spleen	Spleen	Spleen	Embargoed
SAMEA103886158	PRJEB19386	PAIRED	ILLUMINA	Illumina HiSeq 2500	Sus scrofa	Unknown	Unknown	Unknown	Unknown	5 months	28815834	26843112	0.9315	22171	0.694841	Occipital cortex	Brain	Occipital cortex	Embargoed
SAMEA103886159	PRJEB19386	PAIRED	ILLUMINA	Illumina HiSeq 2500	Sus scrofa	Unknown	Unknown	Unknown	Unknown	5 months	28340080	25774741	0.9095	21660	0.678827	Pons	Brain	Pons	Embargoed
SAMEA103886160	PRJEB19386	PAIRED	ILLUMINA	Illumina HiSeq 2500	Sus scrofa	Unknown	Unknown	Unknown	Unknown	5 months	12692382	11441431	0.9014	18387	0.57625	Thalamus	Brain	Thalamus	Embargoed
SAMEA103886162	PRJEB19386	PAIRED	ILLUMINA	Illumina HiSeq 2500	Sus scrofa	Unknown	Unknown	Unknown	Unknown	5 months	31263836	29422120	0.9411	23061	0.722734	Amygdala	Brain	Brain	Embargoed
SAMEA103886163	PRJEB19386	PAIRED	ILLUMINA	Illumina HiSeq 2500	Sus scrofa	Unknown	Unknown	Unknown	Unknown	5 months	26759520	23415830	0.875	21079	0.660618	Ileum	Small intestine	Ileum	Embargoed
SAMEA103886164	PRJEB19386	PAIRED	ILLUMINA	Illumina HiSeq 2500	Sus scrofa	Unknown	Unknown	Unknown	Unknown	5 months	20235444	18018652	0.8905	21026	0.658957	Pons	Brain	Pons	Embargoed
SAMEA103886166	PRJEB19386	PAIRED	ILLUMINA	Illumina HiSeq 2500	Sus scrofa	Unknown	Unknown	Unknown	Unknown	5 months	73295204	62164953	0.8481	23453	0.735019	Penis	Other	Other	Embargoed
SAMEA103886167	PRJEB19386	PAIRED	ILLUMINA	Illumina HiSeq 2500	Sus scrofa	Unknown	Unknown	Unknown	Unknown	5 months	28341391	26155596	0.9229	22510	0.705466	Corpus callosum	Brain	Corpus callosum	Embargoed
SAMEA103886168	PRJEB19386	PAIRED	ILLUMINA	Illumina HiSeq 2500	Sus scrofa	Unknown	Unknown	Unknown	Unknown	Unknown	56364420	43960107	0.7799	17825	0.558637	Macrophage	Blood	Macrophage	Embargoed
SAMEA103886169	PRJEB19386	PAIRED	ILLUMINA	Illumina HiSeq 2500	Sus scrofa	Unknown	Unknown	Unknown	Unknown	5 months	64098080	56961353	0.8887	20224	0.633822	Heart	Heart	Heart	Embargoed
SAMEA103886170	PRJEB19386	PAIRED	ILLUMINA	Illumina HiSeq 2500	Sus scrofa	Unknown	Unknown	Unknown	Unknown	5 months	37687304	33698396	0.8942	21833	0.684248	Spleen	Spleen	Spleen	Embargoed
SAMEA103886171	PRJEB19386	PAIRED	ILLUMINA	Illumina HiSeq 2500	Sus scrofa	Unknown	Unknown	Unknown	Unknown	5 months	60261697	51401914	0.853	19854	0.622226	Muscle	Muscle	Muscle	Embargoed
SAMEA103886172	PRJEB19386	PAIRED	ILLUMINA	Illumina HiSeq 2500	Sus scrofa	Unknown	Unknown	Unknown	Unknown	5 months	61429378	56179564	0.9145	20767	0.65084	Heart	Heart	Heart	Embargoed
SAMEA103886173	PRJEB19386	PAIRED	ILLUMINA	Illumina HiSeq 2500	Sus scrofa	Unknown	Unknown	Unknown	Unknown	5 months	31276416	28755799	0.9194	22399	0.701987	Amygdala	Brain	Brain	Embargoed
SAMEA103886174	PRJEB19386	PAIRED	ILLUMINA	Illumina HiSeq 2500	Sus scrofa	Unknown	Unknown	Unknown	Unknown	5 months	55679239	50792701	0.9122	21746	0.681522	Kidney	Kidney	Kidney	Embargoed
SAMEA103886176	PRJEB19386	PAIRED	ILLUMINA	Illumina HiSeq 2500	Sus scrofa	Unknown	Unknown	Unknown	Unknown	5 months	110107372	97108062	0.8819	23914	0.749467	Duodenum	Small intestine	Duodenum	Embargoed
SAMEA103886177	PRJEB19386	PAIRED	ILLUMINA	Illumina HiSeq 2500	Sus scrofa	Unknown	Unknown	Unknown	Unknown	5 months	20569673	19130894	0.9301	21314	0.667983	Occipital cortex	Brain	Occipital cortex	Embargoed
SAMEA103939806	PRJEB20136	PAIRED	ILLUMINA	Illumina HiSeq 2000	Sus scrofa	Yorkshire	Yorkshire	European pigs	Female	Unknown	23885443	22825218	0.9556	14276	0.447411	Blood	Blood	Blood
SAMEA103939807	PRJEB20136	PAIRED	ILLUMINA	Illumina HiSeq 2000	Sus scrofa	Yorkshire	Yorkshire	European pigs	Female	Unknown	18802572	17770860	0.9451	13550	0.424658	Blood	Blood	Blood
SAMEA103939808	PRJEB20136	PAIRED	ILLUMINA	Illumina HiSeq 2000	Sus scrofa	Yorkshire	Yorkshire	European pigs	Female	Unknown	14190750	13366239	0.9419	12800	0.401153	Blood	Blood	Blood
SAMEA103939809	PRJEB20136	PAIRED	ILLUMINA	Illumina HiSeq 2000	Sus scrofa	Yorkshire	Yorkshire	European pigs	Female	Unknown	16725852	15611419	0.9334	13839	0.433716	Blood	Blood	Blood
SAMEA103939810	PRJEB20136	PAIRED	ILLUMINA	Illumina HiSeq 2000	Sus scrofa	Yorkshire	Yorkshire	European pigs	Female	Unknown	15732426	14906528	0.9475	13466	0.422026	Blood	Blood	Blood
SAMEA103939811	PRJEB20136	PAIRED	ILLUMINA	Illumina HiSeq 2000	Sus scrofa	Yorkshire	Yorkshire	European pigs	Female	Unknown	19587456	18701698	0.9548	14269	0.447192	Blood	Blood	Blood
SAMEA103939812	PRJEB20136	PAIRED	ILLUMINA	Illumina HiSeq 2000	Sus scrofa	Yorkshire	Yorkshire	European pigs	Female	Unknown	17906953	16807048	0.9386	13916	0.436129	Blood	Blood	Blood
SAMEA103939813	PRJEB20136	PAIRED	ILLUMINA	Illumina HiSeq 2000	Sus scrofa	Yorkshire	Yorkshire	European pigs	Female	Unknown	20272639	19324150	0.9532	14064	0.440767	Blood	Blood	Blood
SAMEA103939814	PRJEB20136	PAIRED	ILLUMINA	Illumina HiSeq 2000	Sus scrofa	Yorkshire	Yorkshire	European pigs	Female	Unknown	18557053	17875457	0.9633	14348	0.449668	Blood	Blood	Blood
SAMEA103939815	PRJEB20136	PAIRED	ILLUMINA	Illumina HiSeq 2000	Sus scrofa	Yorkshire	Yorkshire	European pigs	Female	Unknown	15258550	14558795	0.9541	13511	0.423436	Blood	Blood	Blood
SAMEA103939816	PRJEB20136	PAIRED	ILLUMINA	Illumina HiSeq 2000	Sus scrofa	Yorkshire	Yorkshire	European pigs	Female	Unknown	23055825	22001309	0.9543	13869	0.434656	Blood	Blood	Blood
SAMEA103939817	PRJEB20136	PAIRED	ILLUMINA	Illumina HiSeq 2000	Sus scrofa	Yorkshire	Yorkshire	European pigs	Female	Unknown	18996133	18046638	0.95	13795	0.432337	Blood	Blood	Blood
SAMEA103939818	PRJEB20136	PAIRED	ILLUMINA	Illumina HiSeq 2000	Sus scrofa	Yorkshire	Yorkshire	European pigs	Female	Unknown	18989951	18026131	0.9492	13884	0.435126	Blood	Blood	Blood
SAMEA103939819	PRJEB20136	PAIRED	ILLUMINA	Illumina HiSeq 2000	Sus scrofa	Yorkshire	Yorkshire	European pigs	Female	Unknown	22164040	21216232	0.9572	14369	0.450326	Blood	Blood	Blood
SAMEA103939820	PRJEB20136	PAIRED	ILLUMINA	Illumina HiSeq 2000	Sus scrofa	Yorkshire	Yorkshire	European pigs	Female	Unknown	16379282	15726174	0.9601	13597	0.426131	Blood	Blood	Blood
SAMEA103939821	PRJEB20136	PAIRED	ILLUMINA	Illumina HiSeq 2000	Sus scrofa	Yorkshire	Yorkshire	European pigs	Female	Unknown	14354940	13792213	0.9608	14291	0.447881	Blood	Blood	Blood
SAMEA103939822	PRJEB20136	PAIRED	ILLUMINA	Illumina HiSeq 2000	Sus scrofa	Yorkshire	Yorkshire	European pigs	Female	Unknown	18147151	17061887	0.9402	12361	0.387395	Blood	Blood	Blood
SAMEA103939823	PRJEB20136	PAIRED	ILLUMINA	Illumina HiSeq 2000	Sus scrofa	Yorkshire	Yorkshire	European pigs	Female	Unknown	18450848	17563879	0.9519	12994	0.407233	Blood	Blood	Blood
SAMEA103939824	PRJEB20136	PAIRED	ILLUMINA	Illumina HiSeq 2000	Sus scrofa	Yorkshire	Yorkshire	European pigs	Female	Unknown	20145798	18943614	0.9403	12921	0.404945	Blood	Blood	Blood
SAMEA103939825	PRJEB20136	PAIRED	ILLUMINA	Illumina HiSeq 2000	Sus scrofa	Yorkshire	Yorkshire	European pigs	Female	Unknown	18286675	17493141	0.9566	13674	0.428545	Blood	Blood	Blood
SAMEA103939826	PRJEB20136	PAIRED	ILLUMINA	Illumina HiSeq 2000	Sus scrofa	Yorkshire	Yorkshire	European pigs	Female	Unknown	22079890	21091153	0.9552	13315	0.417293	Blood	Blood	Blood
SAMEA103939827	PRJEB20136	PAIRED	ILLUMINA	Illumina HiSeq 2000	Sus scrofa	Yorkshire	Yorkshire	European pigs	Female	Unknown	18568465	17690726	0.9527	13385	0.419487	Blood	Blood	Blood
SAMEA103939828	PRJEB20136	PAIRED	ILLUMINA	Illumina HiSeq 2000	Sus scrofa	Yorkshire	Yorkshire	European pigs	Female	Unknown	19431646	18469187	0.9505	13593	0.426006	Blood	Blood	Blood
SAMEA103939829	PRJEB20136	PAIRED	ILLUMINA	Illumina HiSeq 2000	Sus scrofa	Yorkshire	Yorkshire	European pigs	Female	Unknown	19328082	18523567	0.9584	13730	0.4303	Blood	Blood	Blood
SAMEA103939830	PRJEB20136	PAIRED	ILLUMINA	Illumina HiSeq 2000	Sus scrofa	Yorkshire	Yorkshire	European pigs	Female	Unknown	21225668	20260446	0.9545	14384	0.450796	Blood	Blood	Blood
SAMEA103939831	PRJEB20136	PAIRED	ILLUMINA	Illumina HiSeq 2000	Sus scrofa	Yorkshire	Yorkshire	European pigs	Female	Unknown	23835584	22239895	0.9331	13918	0.436192	Blood	Blood	Blood
SAMEA103939832	PRJEB20136	PAIRED	ILLUMINA	Illumina HiSeq 2000	Sus scrofa	Yorkshire	Yorkshire	European pigs	Female	Unknown	17179099	16356752	0.9521	13683	0.428827	Blood	Blood	Blood
SAMEA103939833	PRJEB20136	PAIRED	ILLUMINA	Illumina HiSeq 2000	Sus scrofa	Yorkshire	Yorkshire	European pigs	Female	Unknown	20198538	18904829	0.936	14094	0.441707	Blood	Blood	Blood
SAMEA103939834	PRJEB20136	PAIRED	ILLUMINA	Illumina HiSeq 2000	Sus scrofa	Yorkshire	Yorkshire	European pigs	Female	Unknown	16692043	15923054	0.9539	13884	0.435126	Blood	Blood	Blood
SAMEA103939835	PRJEB20136	PAIRED	ILLUMINA	Illumina HiSeq 2000	Sus scrofa	Yorkshire	Yorkshire	European pigs	Female	Unknown	20397274	19469429	0.9545	14401	0.451329	Blood	Blood	Blood
SAMEA103939836	PRJEB20136	PAIRED	ILLUMINA	Illumina HiSeq 2000	Sus scrofa	Yorkshire	Yorkshire	European pigs	Female	Unknown	18334551	16459508	0.8977	14117	0.442428	Blood	Blood	Blood
SAMEA103939837	PRJEB20136	PAIRED	ILLUMINA	Illumina HiSeq 2000	Sus scrofa	Yorkshire	Yorkshire	European pigs	Female	Unknown	18612709	17868970	0.96	14393	0.451078	Blood	Blood	Blood
SAMEA104129659	PRJEB21332	SINGLE	ION_TORRENT	Ion Torrent Proton	Sus scrofa	Unknown	Landrace x Yorkshire	Cross	Unknown	Unknown	38565088	30437412	0.7892	14000	0.438761	Muscle	Muscle	Muscle
SAMEA104129660	PRJEB21332	SINGLE	ION_TORRENT	Ion Torrent Proton	Sus scrofa	Unknown	Duroc x Landrace/Yorkshire	Cross	Unknown	Unknown	28129922	24072456	0.8558	14001	0.438793	Muscle	Muscle	Muscle
SAMEA104129661	PRJEB21332	SINGLE	ION_TORRENT	Ion Torrent Proton	Sus scrofa	Unknown	Duroc x Landrace/Yorkshire	Cross	Unknown	Unknown	28686619	24770790	0.8635	13820	0.43312	Muscle	Muscle	Muscle
SAMEA104129662	PRJEB21332	SINGLE	ION_TORRENT	Ion Torrent Proton	Sus scrofa	Unknown	Duroc x Landrace/Yorkshire	Cross	Unknown	Unknown	29803202	25643505	0.8604	13995	0.438605	Muscle	Muscle	Muscle
SAMEA104129663	PRJEB21332	SINGLE	ION_TORRENT	Ion Torrent Proton	Sus scrofa	Unknown	Landrace x Yorkshire	Cross	Unknown	Unknown	42176394	34257171	0.8122	13885	0.435157	Muscle	Muscle	Muscle
SAMEA104129664	PRJEB21332	SINGLE	ION_TORRENT	Ion Torrent Proton	Sus scrofa	Unknown	Duroc x Landrace/Yorkshire	Cross	Unknown	Unknown	30273045	25882035	0.855	14120	0.442522	Muscle	Muscle	Muscle
SAMEA104129665	PRJEB21332	SINGLE	ION_TORRENT	Ion Torrent Proton	Sus scrofa	Unknown	Duroc x Landrace/Yorkshire	Cross	Unknown	Unknown	39590863	34364859	0.868	13958	0.437445	Muscle	Muscle	Muscle
SAMEA104129666	PRJEB21332	SINGLE	ION_TORRENT	Ion Torrent Proton	Sus scrofa	Unknown	Duroc x Landrace/Yorkshire	Cross	Unknown	Unknown	25016844	21411706	0.8559	13787	0.432086	Muscle	Muscle	Muscle
SAMEA104188408	PRJEB22000	PAIRED	ILLUMINA	Illumina HiSeq 2500	Sus scrofa	Yucatan	Yucatan	American pigs	Male	Unknown	10782006	10193252	0.9454	12726	0.398834	Cartilage	Cartilage	Cartilage
SAMEA104188409	PRJEB22000	PAIRED	ILLUMINA	Illumina HiSeq 2500	Sus scrofa	Yucatan	Yucatan	American pigs	Female	Unknown	15141434	14447101	0.9541	13653	0.427886	Cartilage	Cartilage	Cartilage
SAMEA104188410	PRJEB22000	PAIRED	ILLUMINA	Illumina HiSeq 2500	Sus scrofa	Yucatan	Unknown	Unknown	Male	Unknown	15824339	9294497	0.5874	14667	0.459665	Unknown	Unknown	Unknown
SAMEA104188411	PRJEB22000	PAIRED	ILLUMINA	Illumina HiSeq 2500	Sus scrofa	Yucatan	Yucatan	American pigs	Female	Unknown	13208263	12009704	0.9093	12629	0.395794	Cartilage	Cartilage	Cartilage
SAMEA104188412	PRJEB22000	PAIRED	ILLUMINA	Illumina HiSeq 2500	Sus scrofa	Yucatan	Yucatan	American pigs	Female	Unknown	14494312	12008472	0.8285	13236	0.414818	Cartilage	Cartilage	Cartilage
SAMEA104188413	PRJEB22000	PAIRED	ILLUMINA	Illumina HiSeq 2500	Sus scrofa	Yucatan	Yucatan	American pigs	Male	Unknown	16363590	11424796	0.6982	13653	0.427886	Cartilage	Cartilage	Cartilage
SAMEA104188414	PRJEB22000	PAIRED	ILLUMINA	Illumina HiSeq 2500	Sus scrofa	Yucatan	Yucatan	American pigs	Female	Unknown	10691310	10045809	0.9396	13063	0.409396	Cartilage	Cartilage	Cartilage
SAMEA104188415	PRJEB22000	PAIRED	ILLUMINA	Illumina HiSeq 2500	Sus scrofa	Yucatan	Yucatan	American pigs	Male	Unknown	16979373	12496081	0.736	14356	0.449919	Cartilage	Cartilage	Cartilage
SAMEA104188416	PRJEB22000	PAIRED	ILLUMINA	Illumina HiSeq 2500	Sus scrofa	Yucatan	Yucatan	American pigs	Male	Unknown	10418864	9991905	0.959	14055	0.440485	Cartilage	Cartilage	Cartilage
SAMEA104188417	PRJEB22000	PAIRED	ILLUMINA	Illumina HiSeq 2500	Sus scrofa	Yucatan	Unknown	Unknown	Female	Unknown	19042565	6873192	0.3609	13473	0.422245	Unknown	Unknown	Unknown
SAMEA104188418	PRJEB22000	PAIRED	ILLUMINA	Illumina HiSeq 2500	Sus scrofa	Yucatan	Yucatan	American pigs	Male	Unknown	11609281	9298979	0.801	13410	0.420271	Cartilage	Cartilage	Cartilage
SAMEA104188419	PRJEB22000	PAIRED	ILLUMINA	Illumina HiSeq 2500	Sus scrofa	Yucatan	Yucatan	American pigs	Female	Unknown	14930815	14328003	0.9596	14586	0.457127	Cartilage	Cartilage	Cartilage
SAMEA104188420	PRJEB22000	PAIRED	ILLUMINA	Illumina HiSeq 2500	Sus scrofa	Yucatan	Yucatan	American pigs	Male	Unknown	9708033	8491794	0.8747	12280	0.384856	Cartilage	Cartilage	Cartilage
SAMEA104188421	PRJEB22000	PAIRED	ILLUMINA	Illumina HiSeq 2500	Sus scrofa	Yucatan	Yucatan	American pigs	Female	Unknown	15243822	14691759	0.9638	13240	0.414943	Cartilage	Cartilage	Cartilage
SAMEA104188422	PRJEB22000	PAIRED	ILLUMINA	Illumina HiSeq 2500	Sus scrofa	Yucatan	Yucatan	American pigs	Female	Unknown	13831819	13028851	0.9419	14022	0.439451	Cartilage	Cartilage	Cartilage
SAMEA104188423	PRJEB22000	PAIRED	ILLUMINA	Illumina HiSeq 2500	Sus scrofa	Yucatan	Yucatan	American pigs	Male	Unknown	16465260	15686484	0.9527	14513	0.454839	Cartilage	Cartilage	Cartilage
SAMEA104188424	PRJEB22000	PAIRED	ILLUMINA	Illumina HiSeq 2500	Sus scrofa	Yucatan	Yucatan	American pigs	Male	Unknown	14227046	13291686	0.9343	13277	0.416103	Cartilage	Cartilage	Cartilage
SAMEA104188425	PRJEB22000	PAIRED	ILLUMINA	Illumina HiSeq 2500	Sus scrofa	Yucatan	Yucatan	American pigs	Female	Unknown	16920852	15624343	0.9234	14324	0.448916	Cartilage	Cartilage	Cartilage
SAMEA104188426	PRJEB22000	PAIRED	ILLUMINA	Illumina HiSeq 2500	Sus scrofa	Yucatan	Yucatan	American pigs	Female	Unknown	9915048	7791353	0.7858	12353	0.387144	Cartilage	Cartilage	Cartilage
SAMEA104188427	PRJEB22000	PAIRED	ILLUMINA	Illumina HiSeq 2500	Sus scrofa	Yucatan	Yucatan	American pigs	Male	Unknown	14429208	13835565	0.9589	14197	0.444935	Cartilage	Cartilage	Cartilage
SAMEA104188428	PRJEB22000	PAIRED	ILLUMINA	Illumina HiSeq 2500	Sus scrofa	Yucatan	Yucatan	American pigs	Female	Unknown	7650692	7326638	0.9576	11785	0.369343	Cartilage	Cartilage	Cartilage
SAMEA104188429	PRJEB22000	PAIRED	ILLUMINA	Illumina HiSeq 2500	Sus scrofa	Yucatan	Yucatan	American pigs	Male	Unknown	14557702	13918692	0.9561	14473	0.453585	Cartilage	Cartilage	Cartilage
SAMEA104188430	PRJEB22000	PAIRED	ILLUMINA	Illumina HiSeq 2500	Sus scrofa	Yucatan	Yucatan	American pigs	Female	Unknown	8632336	8307902	0.9624	13065	0.409458	Cartilage	Cartilage	Cartilage
SAMEA104188431	PRJEB22000	PAIRED	ILLUMINA	Illumina HiSeq 2500	Sus scrofa	Yucatan	Yucatan	American pigs	Male	Unknown	14214207	13653856	0.9606	13727	0.430206	Cartilage	Cartilage	Cartilage
SAMEA104188432	PRJEB22000	PAIRED	ILLUMINA	Illumina HiSeq 2500	Sus scrofa	Yucatan	Yucatan	American pigs	Male	Unknown	11458015	10818175	0.9442	12160	0.381096	Cartilage	Cartilage	Cartilage
SAMEA104188433	PRJEB22000	PAIRED	ILLUMINA	Illumina HiSeq 2500	Sus scrofa	Yucatan	Yucatan	American pigs	Female	Unknown	29497396	28358836	0.9614	15227	0.477216	Cartilage	Cartilage	Cartilage
SAMEA104188434	PRJEB22000	PAIRED	ILLUMINA	Illumina HiSeq 2500	Sus scrofa	Yucatan	Yucatan	American pigs	Male	Unknown	11117296	10631759	0.9563	13724	0.430112	Cartilage	Cartilage	Cartilage
SAMEA104188435	PRJEB22000	PAIRED	ILLUMINA	Illumina HiSeq 2500	Sus scrofa	Yucatan	Yucatan	American pigs	Female	Unknown	25588674	24015422	0.9385	15418	0.483202	Cartilage	Cartilage	Cartilage
SAMEA104188436	PRJEB22000	PAIRED	ILLUMINA	Illumina HiSeq 2500	Sus scrofa	Yucatan	Yucatan	American pigs	Female	Unknown	9962933	8079024	0.8109	12613	0.395293	Cartilage	Cartilage	Cartilage
SAMEA104188437	PRJEB22000	PAIRED	ILLUMINA	Illumina HiSeq 2500	Sus scrofa	Yucatan	Yucatan	American pigs	Male	Unknown	17967382	16346345	0.9098	13954	0.43732	Cartilage	Cartilage	Cartilage
SAMEA104188438	PRJEB22000	PAIRED	ILLUMINA	Illumina HiSeq 2500	Sus scrofa	Yucatan	Yucatan	American pigs	Female	Unknown	9520431	9139684	0.96	13297	0.416729	Cartilage	Cartilage	Cartilage
SAMEA104188439	PRJEB22000	PAIRED	ILLUMINA	Illumina HiSeq 2500	Sus scrofa	Yucatan	Yucatan	American pigs	Male	Unknown	18058460	17442450	0.9659	14893	0.466748	Cartilage	Cartilage	Cartilage
SAMEA104188440	PRJEB22000	PAIRED	ILLUMINA	Illumina HiSeq 2500	Sus scrofa	Yucatan	Yucatan	American pigs	Female	Unknown	11064596	10579642	0.9562	13928	0.436505	Cartilage	Cartilage	Cartilage
SAMEA104188441	PRJEB22000	PAIRED	ILLUMINA	Illumina HiSeq 2500	Sus scrofa	Yucatan	Yucatan	American pigs	Male	Unknown	12798834	7755618	0.606	13169	0.412718	Cartilage	Cartilage	Cartilage
SAMEA104188442	PRJEB22000	PAIRED	ILLUMINA	Illumina HiSeq 2500	Sus scrofa	Yucatan	Unknown	Unknown	Female	Unknown	8198875	3910159	0.4769	13951	0.437226	Unknown	Unknown	Unknown
SAMEA104188443	PRJEB22000	PAIRED	ILLUMINA	Illumina HiSeq 2500	Sus scrofa	Yucatan	Unknown	Unknown	Male	Unknown	10009814	4483365	0.4479	13714	0.429798	Unknown	Unknown	Unknown
SAMEA104188444	PRJEB22000	PAIRED	ILLUMINA	Illumina HiSeq 2500	Sus scrofa	Yucatan	Yucatan	American pigs	Male	Unknown	9729513	8872371	0.9119	12221	0.383007	Cartilage	Cartilage	Cartilage
SAMEA104188445	PRJEB22000	PAIRED	ILLUMINA	Illumina HiSeq 2500	Sus scrofa	Yucatan	Yucatan	American pigs	Female	Unknown	18471814	17827029	0.9651	13598	0.426163	Cartilage	Cartilage	Cartilage
SAMEA104188446	PRJEB22000	PAIRED	ILLUMINA	Illumina HiSeq 2500	Sus scrofa	Yucatan	Yucatan	American pigs	Female	Unknown	9247577	8896258	0.962	12882	0.403723	Cartilage	Cartilage	Cartilage
SAMEA104188447	PRJEB22000	PAIRED	ILLUMINA	Illumina HiSeq 2500	Sus scrofa	Yucatan	Yucatan	American pigs	Male	Unknown	16663338	15983683	0.9592	14323	0.448884	Cartilage	Cartilage	Cartilage
SAMEA104188448	PRJEB22000	PAIRED	ILLUMINA	Illumina HiSeq 2500	Sus scrofa	Yucatan	Yucatan	American pigs	Male	Unknown	11143675	10658367	0.9564	13709	0.429641	Cartilage	Cartilage	Cartilage
SAMEA104188449	PRJEB22000	PAIRED	ILLUMINA	Illumina HiSeq 2500	Sus scrofa	Yucatan	Yucatan	American pigs	Female	Unknown	13644853	13175234	0.9656	13321	0.417482	Cartilage	Cartilage	Cartilage
SAMEA103887272	PRJEB23119	PAIRED	ILLUMINA	Illumina HiSeq 2500	Sus scrofa	Unknown	Unknown	Unknown	Unknown	Unknown	42632420	36385188	0.8535	16819	0.527109	Macrophage	Blood	Macrophage	Embargoed
SAMEA103887274	PRJEB23119	PAIRED	ILLUMINA	Illumina HiSeq 2500	Sus scrofa	Unknown	Unknown	Unknown	Unknown	Unknown	99942453	85750115	0.858	18181	0.569794	Macrophage	Blood	Macrophage	Embargoed
SAMEA103887275	PRJEB23119	PAIRED	ILLUMINA	Illumina HiSeq 2500	Sus scrofa	Unknown	Unknown	Unknown	Unknown	Unknown	95743743	81439900	0.8506	15566	0.48784	Macrophage	Blood	Macrophage	Embargoed
SAMEA103887277	PRJEB23119	PAIRED	ILLUMINA	Illumina HiSeq 2500	Sus scrofa	Unknown	Unknown	Unknown	Unknown	Unknown	92859157	78986754	0.8506	18007	0.564341	Macrophage	Blood	Macrophage	Embargoed
SAMEA103887279	PRJEB23119	PAIRED	ILLUMINA	Illumina HiSeq 2500	Sus scrofa	Unknown	Unknown	Unknown	Unknown	Unknown	3217859	2778799	0.8636	12100	0.379215	Macrophage	Blood	Macrophage	Embargoed
SAMEA103887281	PRJEB23119	PAIRED	ILLUMINA	Illumina HiSeq 2500	Sus scrofa	Unknown	Unknown	Unknown	Unknown	Unknown	116978260	101610562	0.8686	19065	0.597499	Macrophage	Blood	Macrophage	Embargoed
SAMEA104365477	PRJEB23289	PAIRED	ILLUMINA	Illumina HiSeq 2500	Sus scrofa	Maxgro (Hermitage Genetics) x (German Landrace x Large White)	Maxgro (Hermitage Genetics) x (German Landrace x Yorkshire)	Cross	Female	134 days	48777836	30084127	0.6168	18656	0.584681	Muscle	Muscle	Muscle
SAMEA104365478	PRJEB23289	PAIRED	ILLUMINA	Illumina HiSeq 2500	Sus scrofa	Maxgro (Hermitage Genetics) x (German Landrace x Large White)	Maxgro (Hermitage Genetics) x (German Landrace x Yorkshire)	Cross	Male	134 days	46527379	30929500	0.6648	18644	0.584305	Muscle	Muscle	Muscle
SAMEA104365479	PRJEB23289	PAIRED	ILLUMINA	Illumina HiSeq 2500	Sus scrofa	Maxgro (Hermitage Genetics) x (German Landrace x Large White)	Maxgro (Hermitage Genetics) x (German Landrace x Yorkshire)	Cross	Male	134 days	47435465	32028893	0.6752	18625	0.583709	Muscle	Muscle	Muscle
SAMEA104365480	PRJEB23289	PAIRED	ILLUMINA	Illumina HiSeq 2500	Sus scrofa	Maxgro (Hermitage Genetics) x (German Landrace x Large White)	Maxgro (Hermitage Genetics) x (German Landrace x Yorkshire)	Cross	Female	135 days	52211949	35387825	0.6778	18752	0.58769	Muscle	Muscle	Muscle
SAMEA104365481	PRJEB23289	PAIRED	ILLUMINA	Illumina HiSeq 2500	Sus scrofa	Maxgro (Hermitage Genetics) x (German Landrace x Large White)	Unknown	Unknown	Female	134 days	38950699	20575429	0.5282	14355	0.449887	Unknown	Unknown	Unknown
SAMEA104365482	PRJEB23289	PAIRED	ILLUMINA	Illumina HiSeq 2500	Sus scrofa	Maxgro (Hermitage Genetics) x (German Landrace x Large White)	Maxgro (Hermitage Genetics) x (German Landrace x Yorkshire)	Cross	Female	134 days	44734880	32362636	0.7234	18471	0.578883	Muscle	Muscle	Muscle
SAMEA104365483	PRJEB23289	PAIRED	ILLUMINA	Illumina HiSeq 2500	Sus scrofa	Maxgro (Hermitage Genetics) x (German Landrace x Large White)	Maxgro (Hermitage Genetics) x (German Landrace x Yorkshire)	Cross	Male	134 days	53776406	35317110	0.6567	18493	0.579573	Muscle	Muscle	Muscle
SAMEA104365484	PRJEB23289	PAIRED	ILLUMINA	Illumina HiSeq 2500	Sus scrofa	Maxgro (Hermitage Genetics) x (German Landrace x Large White)	Maxgro (Hermitage Genetics) x (German Landrace x Yorkshire)	Cross	Male	134 days	54645963	35729853	0.6538	18538	0.580983	Muscle	Muscle	Muscle
SAMEA104365485	PRJEB23289	PAIRED	ILLUMINA	Illumina HiSeq 2500	Sus scrofa	Maxgro (Hermitage Genetics) x (German Landrace x Large White)	Unknown	Unknown	Male	140 days	49809484	26595532	0.5339	15100	0.473236	Unknown	Unknown	Unknown
SAMEA104365486	PRJEB23289	PAIRED	ILLUMINA	Illumina HiSeq 2500	Sus scrofa	Maxgro (Hermitage Genetics) x (German Landrace x Large White)	Unknown	Unknown	Male	140 days	48299609	24389650	0.505	13799	0.432462	Unknown	Unknown	Unknown
SAMEA104365487	PRJEB23289	PAIRED	ILLUMINA	Illumina HiSeq 2500	Sus scrofa	Maxgro (Hermitage Genetics) x (German Landrace x Large White)	Unknown	Unknown	Male	141 days	80655224	42395541	0.5256	14051	0.44036	Unknown	Unknown	Unknown
SAMEA104365488	PRJEB23289	PAIRED	ILLUMINA	Illumina HiSeq 2500	Sus scrofa	Maxgro (Hermitage Genetics) x (German Landrace x Large White)	Maxgro (Hermitage Genetics) x (German Landrace x Yorkshire)	Cross	Female	141 days	50837694	33630011	0.6615	17854	0.559546	Muscle	Muscle	Muscle
SAMEA104365489	PRJEB23289	PAIRED	ILLUMINA	Illumina HiSeq 2500	Sus scrofa	Maxgro (Hermitage Genetics) x (German Landrace x Large White)	Unknown	Unknown	Female	141 days	53509493	25509055	0.4767	14069	0.440924	Unknown	Unknown	Unknown
SAMEA104365490	PRJEB23289	PAIRED	ILLUMINA	Illumina HiSeq 2500	Sus scrofa	Maxgro (Hermitage Genetics) x (German Landrace x Large White)	Maxgro (Hermitage Genetics) x (German Landrace x Yorkshire)	Cross	Female	140 days	44542154	26919795	0.6044	17448	0.546822	Muscle	Muscle	Muscle
SAMEA104365491	PRJEB23289	PAIRED	ILLUMINA	Illumina HiSeq 2500	Sus scrofa	Maxgro (Hermitage Genetics) x (German Landrace x Large White)	Maxgro (Hermitage Genetics) x (German Landrace x Yorkshire)	Cross	Male	141 days	42933822	29751429	0.693	18330	0.574464	Muscle	Muscle	Muscle
SAMEA104365492	PRJEB23289	PAIRED	ILLUMINA	Illumina HiSeq 2500	Sus scrofa	Maxgro (Hermitage Genetics) x (German Landrace x Large White)	Unknown	Unknown	Female	141 days	48319072	27809084	0.5755	14241	0.446314	Unknown	Unknown	Unknown
SAMEA104406691	PRJEB23654	PAIRED	ILLUMINA	Illumina HiSeq 2500	Sus scrofa	Maxgro (Hermitage Genetics) x (German Landrace x Large White)	Maxgro (Hermitage Genetics) x (German Landrace x Yorkshire)	Cross	Female	134 days	50971494	32318321	0.634	19988	0.626426	Adipose	Adipose	Adipose
SAMEA104406692	PRJEB23654	PAIRED	ILLUMINA	Illumina HiSeq 2500	Sus scrofa	Maxgro (Hermitage Genetics) x (German Landrace x Large White)	Unknown	Unknown	Male	134 days	44029257	25640619	0.5824	17045	0.534192	Unknown	Unknown	Unknown
SAMEA104406693	PRJEB23654	PAIRED	ILLUMINA	Illumina HiSeq 2500	Sus scrofa	Maxgro (Hermitage Genetics) x (German Landrace x Large White)	Yorkshire	European pigs	Male	134 days	57344717	35926695	0.6265	20525	0.643256	Adipose	Adipose	Adipose
SAMEA104406694	PRJEB23654	PAIRED	ILLUMINA	Illumina HiSeq 2500	Sus scrofa	Maxgro (Hermitage Genetics) x (German Landrace x Large White)	Maxgro (Hermitage Genetics) x (German Landrace x Yorkshire)	Cross	Female	135 days	42447019	25984523	0.6122	19012	0.595838	Adipose	Adipose	Adipose
SAMEA104406695	PRJEB23654	PAIRED	ILLUMINA	Illumina HiSeq 2500	Sus scrofa	Maxgro (Hermitage Genetics) x (German Landrace x Large White)	Maxgro (Hermitage Genetics) x (German Landrace x Yorkshire)	Cross	Female	134 days	84452390	54937248	0.6505	21365	0.669581	Adipose	Adipose	Adipose
SAMEA104406696	PRJEB23654	PAIRED	ILLUMINA	Illumina HiSeq 2500	Sus scrofa	Maxgro (Hermitage Genetics) x (German Landrace x Large White)	Maxgro (Hermitage Genetics) x (German Landrace x Yorkshire)	Cross	Female	134 days	40112122	24581024	0.6128	18961	0.59424	Adipose	Adipose	Adipose
SAMEA104406697	PRJEB23654	PAIRED	ILLUMINA	Illumina HiSeq 2500	Sus scrofa	Maxgro (Hermitage Genetics) x (German Landrace x Large White)	Maxgro (Hermitage Genetics) x (German Landrace x Yorkshire)	Cross	Male	134 days	55492140	36899301	0.6649	20878	0.654319	Adipose	Adipose	Adipose
SAMEA104406698	PRJEB23654	PAIRED	ILLUMINA	Illumina HiSeq 2500	Sus scrofa	Maxgro (Hermitage Genetics) x (German Landrace x Large White)	Maxgro (Hermitage Genetics) x (German Landrace x Yorkshire)	Cross	Male	134 days	46878646	30083948	0.6417	20754	0.650432	Adipose	Adipose	Adipose
SAMEA104406699	PRJEB23654	PAIRED	ILLUMINA	Illumina HiSeq 2500	Sus scrofa	Maxgro (Hermitage Genetics) x (German Landrace x Large White)	Maxgro (Hermitage Genetics) x (German Landrace x Yorkshire)	Cross	Male	140 days	47494837	29440062	0.6199	20065	0.628839	Adipose	Adipose	Adipose
SAMEA104406700	PRJEB23654	PAIRED	ILLUMINA	Illumina HiSeq 2500	Sus scrofa	Maxgro (Hermitage Genetics) x (German Landrace x Large White)	Unknown	Unknown	Male	140 days	48742205	27966248	0.5738	16140	0.505829	Unknown	Unknown	Unknown
SAMEA104406701	PRJEB23654	PAIRED	ILLUMINA	Illumina HiSeq 2500	Sus scrofa	Maxgro (Hermitage Genetics) x (German Landrace x Large White)	Unknown	Unknown	Male	141 days	44853594	26177960	0.5836	16612	0.520622	Unknown	Unknown	Unknown
SAMEA104406702	PRJEB23654	PAIRED	ILLUMINA	Illumina HiSeq 2500	Sus scrofa	Maxgro (Hermitage Genetics) x (German Landrace x Large White)	Maxgro (Hermitage Genetics) x (German Landrace x Yorkshire)	Cross	Female	141 days	50574532	30784494	0.6087	19721	0.618058	Adipose	Adipose	Adipose
SAMEA104406703	PRJEB23654	PAIRED	ILLUMINA	Illumina HiSeq 2500	Sus scrofa	Maxgro (Hermitage Genetics) x (German Landrace x Large White)	Maxgro (Hermitage Genetics) x (German Landrace x Yorkshire)	Cross	Female	141 days	44979230	30851433	0.6859	19981	0.626207	Adipose	Adipose	Adipose
SAMEA104406704	PRJEB23654	PAIRED	ILLUMINA	Illumina HiSeq 2500	Sus scrofa	Maxgro (Hermitage Genetics) x (German Landrace x Large White)	Maxgro (Hermitage Genetics) x (German Landrace x Yorkshire)	Cross	Female	140 days	49883571	33421550	0.67	20450	0.640905	Adipose	Adipose	Adipose
SAMEA104406705	PRJEB23654	PAIRED	ILLUMINA	Illumina HiSeq 2500	Sus scrofa	Maxgro (Hermitage Genetics) x (German Landrace x Large White)	Maxgro (Hermitage Genetics) x (German Landrace x Yorkshire)	Cross	Male	141 days	54509880	33124083	0.6077	20252	0.6347	Adipose	Adipose	Adipose
SAMEA104406706	PRJEB23654	PAIRED	ILLUMINA	Illumina HiSeq 2500	Sus scrofa	Maxgro (Hermitage Genetics) x (German Landrace x Large White)	Maxgro (Hermitage Genetics) x (German Landrace x Yorkshire)	Cross	Female	141 days	49617336	30308516	0.6108	19648	0.61577	Adipose	Adipose	Adipose
SAMEA104407658	PRJEB23668	PAIRED	ILLUMINA	Illumina HiSeq 2500	Sus scrofa	Maxgro (Hermitage Genetics) x (German Landrace x Large White)	Maxgro (Hermitage Genetics) x (German Landrace x Yorkshire)	Cross	Female	134 days	60801209	45554659	0.7492	19015	0.595932	Liver	Liver	Liver
SAMEA104407659	PRJEB23668	PAIRED	ILLUMINA	Illumina HiSeq 2500	Sus scrofa	Maxgro (Hermitage Genetics) x (German Landrace x Large White)	Maxgro (Hermitage Genetics) x (German Landrace x Yorkshire)	Cross	Male	134 days	42536639	32130840	0.7554	18359	0.575373	Liver	Liver	Liver
SAMEA104407660	PRJEB23668	PAIRED	ILLUMINA	Illumina HiSeq 2500	Sus scrofa	Maxgro (Hermitage Genetics) x (German Landrace x Large White)	Yorkshire	European pigs	Male	134 days	56688801	39664633	0.6997	18537	0.580951	Liver	Liver	Liver
SAMEA104407661	PRJEB23668	PAIRED	ILLUMINA	Illumina HiSeq 2500	Sus scrofa	Maxgro (Hermitage Genetics) x (German Landrace x Large White)	Maxgro (Hermitage Genetics) x (German Landrace x Yorkshire)	Cross	Female	135 days	49420558	38658577	0.7822	18366	0.575592	Liver	Liver	Liver
SAMEA104407662	PRJEB23668	PAIRED	ILLUMINA	Illumina HiSeq 2500	Sus scrofa	Maxgro (Hermitage Genetics) x (German Landrace x Large White)	Maxgro (Hermitage Genetics) x (German Landrace x Yorkshire)	Cross	Female	134 days	52466649	38174111	0.7276	18354	0.575216	Liver	Liver	Liver
SAMEA104407663	PRJEB23668	PAIRED	ILLUMINA	Illumina HiSeq 2500	Sus scrofa	Maxgro (Hermitage Genetics) x (German Landrace x Large White)	Maxgro (Hermitage Genetics) x (German Landrace x Yorkshire)	Cross	Female	134 days	57612176	44823031	0.778	18788	0.588818	Liver	Liver	Liver
SAMEA104407664	PRJEB23668	PAIRED	ILLUMINA	Illumina HiSeq 2500	Sus scrofa	Maxgro (Hermitage Genetics) x (German Landrace x Large White)	Maxgro (Hermitage Genetics) x (German Landrace x Yorkshire)	Cross	Male	134 days	58029185	37784575	0.6511	18297	0.57343	Liver	Liver	Liver
SAMEA104407665	PRJEB23668	PAIRED	ILLUMINA	Illumina HiSeq 2500	Sus scrofa	Maxgro (Hermitage Genetics) x (German Landrace x Large White)	Maxgro (Hermitage Genetics) x (German Landrace x Yorkshire)	Cross	Male	134 days	57387018	43264158	0.7539	19462	0.609941	Liver	Liver	Liver
SAMEA104407666	PRJEB23668	PAIRED	ILLUMINA	Illumina HiSeq 2500	Sus scrofa	Maxgro (Hermitage Genetics) x (German Landrace x Large White)	Maxgro (Hermitage Genetics) x (German Landrace x Yorkshire)	Cross	Male	140 days	53143582	32985318	0.6207	17687	0.554312	Liver	Liver	Liver
SAMEA104407667	PRJEB23668	PAIRED	ILLUMINA	Illumina HiSeq 2500	Sus scrofa	Maxgro (Hermitage Genetics) x (German Landrace x Large White)	Maxgro (Hermitage Genetics) x (German Landrace x Yorkshire)	Cross	Male	140 days	42785049	28312579	0.6617	16494	0.516924	Liver	Liver	Liver
SAMEA104407668	PRJEB23668	PAIRED	ILLUMINA	Illumina HiSeq 2500	Sus scrofa	Maxgro (Hermitage Genetics) x (German Landrace x Large White)	Maxgro (Hermitage Genetics) x (German Landrace x Yorkshire)	Cross	Male	141 days	48986987	32373776	0.6609	17291	0.541902	Liver	Liver	Liver
SAMEA104407669	PRJEB23668	PAIRED	ILLUMINA	Illumina HiSeq 2500	Sus scrofa	Maxgro (Hermitage Genetics) x (German Landrace x Large White)	Maxgro (Hermitage Genetics) x (German Landrace x Yorkshire)	Cross	Female	141 days	44555248	27718267	0.6221	16978	0.532092	Liver	Liver	Liver
SAMEA104407670	PRJEB23668	PAIRED	ILLUMINA	Illumina HiSeq 2500	Sus scrofa	Maxgro (Hermitage Genetics) x (German Landrace x Large White)	Maxgro (Hermitage Genetics) x (German Landrace x Yorkshire)	Cross	Female	141 days	45130558	30144455	0.6679	17195	0.538893	Liver	Liver	Liver
SAMEA104407671	PRJEB23668	PAIRED	ILLUMINA	Illumina HiSeq 2500	Sus scrofa	Maxgro (Hermitage Genetics) x (German Landrace x Large White)	Unknown	Unknown	Female	140 days	48958154	28412714	0.5803	13873	0.434781	Unknown	Unknown	Unknown
SAMEA104407672	PRJEB23668	PAIRED	ILLUMINA	Illumina HiSeq 2500	Sus scrofa	Maxgro (Hermitage Genetics) x (German Landrace x Large White)	Maxgro (Hermitage Genetics) x (German Landrace x Yorkshire)	Cross	Male	141 days	47383566	32629381	0.6886	17984	0.56362	Liver	Liver	Liver
SAMEA104407673	PRJEB23668	PAIRED	ILLUMINA	Illumina HiSeq 2500	Sus scrofa	Maxgro (Hermitage Genetics) x (German Landrace x Large White)	Maxgro (Hermitage Genetics) x (German Landrace x Yorkshire)	Cross	Female	141 days	47352199	34536315	0.7293	18716	0.586561	Liver	Liver	Liver
SAMEA104408990	PRJEB23685	SINGLE	ILLUMINA	Illumina Genome Analyzer IIx	Sus scrofa	Landrace	Landrace x Yorkshire	Cross	Female	Unknown	11302510	9114806	0.8064	16373	0.513132	Uterus	Uterus	Uterus
SAMEA104408991	PRJEB23685	SINGLE	ILLUMINA	Illumina Genome Analyzer IIx	Sus scrofa	Landrace	Landrace x Yorkshire	Cross	Female	Unknown	10199588	8304023	0.8142	16134	0.505641	Uterus	Uterus	Uterus
SAMEA104408992	PRJEB23685	SINGLE	ILLUMINA	Illumina Genome Analyzer IIx	Sus scrofa	Landrace	Landrace x Yorkshire	Cross	Female	Unknown	13014902	10932773	0.84	17934	0.562053	Uterus	Uterus	Uterus
SAMEA104408993	PRJEB23685	SINGLE	ILLUMINA	Illumina Genome Analyzer IIx	Sus scrofa	Landrace	Landrace x Yorkshire	Cross	Female	Unknown	10491088	8220275	0.7835	16029	0.502351	Uterus	Uterus	Uterus
SAMEA104408994	PRJEB23685	SINGLE	ILLUMINA	Illumina Genome Analyzer IIx	Sus scrofa	Landrace	Landrace x Yorkshire	Cross	Female	Unknown	11627819	9428261	0.8108	16514	0.51755	Uterus	Uterus	Uterus
SAMEA104408995	PRJEB23685	SINGLE	ILLUMINA	Illumina Genome Analyzer IIx	Sus scrofa	Landrace	Landrace x Yorkshire	Cross	Female	Unknown	13502282	11419122	0.8457	17587	0.551178	Uterus	Uterus	Uterus
SAMEA104408996	PRJEB23685	SINGLE	ILLUMINA	Illumina Genome Analyzer IIx	Sus scrofa	Landrace	Landrace x Yorkshire	Cross	Female	Unknown	12298419	10225207	0.8314	17135	0.537013	Uterus	Uterus	Uterus
SAMEA104408997	PRJEB23685	SINGLE	ILLUMINA	Illumina Genome Analyzer IIx	Sus scrofa	Landrace	Landrace x Yorkshire	Cross	Female	Unknown	11769968	9633770	0.8185	17702	0.554782	Uterus	Uterus	Uterus
SAMEA104408998	PRJEB23685	SINGLE	ILLUMINA	Illumina Genome Analyzer IIx	Sus scrofa	Landrace	Landrace x Yorkshire	Cross	Female	Unknown	11401151	9401678	0.8246	17455	0.547041	Uterus	Uterus	Uterus
SAMEA104408999	PRJEB23685	SINGLE	ILLUMINA	Illumina Genome Analyzer IIx	Sus scrofa	Landrace	Landrace x Yorkshire	Cross	Female	Unknown	12345086	10298970	0.8343	17662	0.553529	Uterus	Uterus	Uterus
SAMEA104409000	PRJEB23685	SINGLE	ILLUMINA	Illumina Genome Analyzer IIx	Sus scrofa	Landrace	Landrace x Yorkshire	Cross	Female	Unknown	11700158	9911311	0.8471	17660	0.553466	Uterus	Uterus	Uterus
SAMEA104409001	PRJEB23685	SINGLE	ILLUMINA	Illumina Genome Analyzer IIx	Sus scrofa	Landrace	Landrace x Yorkshire	Cross	Female	Unknown	11077341	9275516	0.8373	17833	0.558888	Uterus	Uterus	Uterus
SAMEA104409002	PRJEB23685	SINGLE	ILLUMINA	Illumina Genome Analyzer IIx	Sus scrofa	Landrace	Landrace x Yorkshire	Cross	Female	Unknown	12310681	10116909	0.8218	18254	0.572082	Uterus	Uterus	Uterus
SAMEA104409003	PRJEB23685	SINGLE	ILLUMINA	Illumina Genome Analyzer IIx	Sus scrofa	Landrace	Landrace x Yorkshire	Cross	Female	Unknown	11642892	9981434	0.8573	17012	0.533158	Uterus	Uterus	Uterus
SAMEA104409004	PRJEB23685	SINGLE	ILLUMINA	Illumina Genome Analyzer IIx	Sus scrofa	Landrace	Landrace x Yorkshire	Cross	Female	Unknown	11437602	9538578	0.834	17355	0.543907	Uterus	Uterus	Uterus
SAMEA104409005	PRJEB23685	SINGLE	ILLUMINA	Illumina Genome Analyzer IIx	Sus scrofa	Landrace	Landrace x Yorkshire	Cross	Female	Unknown	10551441	8589168	0.814	17578	0.550896	Uterus	Uterus	Uterus
SAMEA104410634	PRJEB23699	SINGLE	ILLUMINA	Illumina HiSeq 2000	Sus scrofa	Lanbrace x Pietrain	Lanbrace x Pietrain	Cross	Female	Unknown	25241599	23905379	0.9471	12536	0.39288	Blastocyst	Embryo	Blastocyst
SAMEA104410635	PRJEB23699	SINGLE	ILLUMINA	Illumina HiSeq 2000	Sus scrofa	Lanbrace x Pietrain	Lanbrace x Pietrain	Cross	Female	Unknown	21806771	20456430	0.9381	12378	0.387928	Blastocyst	Embryo	Blastocyst
SAMEA104410636	PRJEB23699	SINGLE	ILLUMINA	Illumina HiSeq 2000	Sus scrofa	Lanbrace x Pietrain	Lanbrace x Pietrain	Cross	Female	Unknown	24109302	22262221	0.9234	12600	0.394885	Blastocyst	Embryo	Blastocyst
SAMEA104410637	PRJEB23699	SINGLE	ILLUMINA	Illumina HiSeq 2000	Sus scrofa	Lanbrace x Pietrain	Lanbrace x Pietrain	Cross	Female	Unknown	23998971	22719382	0.9467	12754	0.399712	Blastocyst	Embryo	Blastocyst
SAMEA104410638	PRJEB23699	SINGLE	ILLUMINA	Illumina HiSeq 2000	Sus scrofa	Lanbrace x Pietrain	Lanbrace x Pietrain	Cross	Female	Unknown	32761292	31384027	0.958	13941	0.436912	Blastocyst	Embryo	Blastocyst
SAMEA104410639	PRJEB23699	SINGLE	ILLUMINA	Illumina HiSeq 2000	Sus scrofa	Lanbrace x Pietrain	Lanbrace x Pietrain	Cross	Female	Unknown	28478298	27251383	0.9569	13244	0.415068	Blastocyst	Embryo	Blastocyst
SAMEA104410640	PRJEB23699	SINGLE	ILLUMINA	Illumina HiSeq 2000	Sus scrofa	Lanbrace x Pietrain	Lanbrace x Pietrain	Cross	Female	Unknown	22540516	21385729	0.9488	12574	0.39407	Blastocyst	Embryo	Blastocyst
SAMEA104410641	PRJEB23699	SINGLE	ILLUMINA	Illumina HiSeq 2000	Sus scrofa	Lanbrace x Pietrain	Lanbrace x Pietrain	Cross	Male	Unknown	24364312	23283705	0.9556	12903	0.404381	Blastocyst	Embryo	Blastocyst
SAMEA104410642	PRJEB23699	SINGLE	ILLUMINA	Illumina HiSeq 2000	Sus scrofa	Lanbrace x Pietrain	Lanbrace x Pietrain	Cross	Male	Unknown	26066748	24899371	0.9552	12748	0.399524	Blastocyst	Embryo	Blastocyst
SAMEA104410643	PRJEB23699	SINGLE	ILLUMINA	Illumina HiSeq 2000	Sus scrofa	Lanbrace x Pietrain	Lanbrace x Pietrain	Cross	Male	Unknown	24058610	22984970	0.9554	13241	0.414974	Blastocyst	Embryo	Blastocyst
SAMEA104410644	PRJEB23699	SINGLE	ILLUMINA	Illumina HiSeq 2000	Sus scrofa	Lanbrace x Pietrain	Lanbrace x Pietrain	Cross	Male	Unknown	29268941	27975339	0.9558	13426	0.420772	Blastocyst	Embryo	Blastocyst
SAMEA104410645	PRJEB23699	SINGLE	ILLUMINA	Illumina HiSeq 2000	Sus scrofa	Lanbrace x Pietrain	Lanbrace x Pietrain	Cross	Male	Unknown	25072300	23867811	0.952	13030	0.408362	Blastocyst	Embryo	Blastocyst
SAMEA104410646	PRJEB23699	SINGLE	ILLUMINA	Illumina HiSeq 2000	Sus scrofa	Lanbrace x Pietrain	Lanbrace x Pietrain	Cross	Female	Unknown	33847330	32314168	0.9547	14287	0.447756	Blastocyst	Embryo	Blastocyst
SAMEA104410647	PRJEB23699	SINGLE	ILLUMINA	Illumina HiSeq 2000	Sus scrofa	Lanbrace x Pietrain	Lanbrace x Pietrain	Cross	Female	Unknown	20972764	19507681	0.9301	12545	0.393162	Blastocyst	Embryo	Blastocyst
SAMEA104410648	PRJEB23699	SINGLE	ILLUMINA	Illumina HiSeq 2000	Sus scrofa	Lanbrace x Pietrain	Lanbrace x Pietrain	Cross	Female	Unknown	24774347	23541095	0.9502	12514	0.39219	Blastocyst	Embryo	Blastocyst
SAMEA104410649	PRJEB23699	SINGLE	ILLUMINA	Illumina HiSeq 2000	Sus scrofa	Lanbrace x Pietrain	Lanbrace x Pietrain	Cross	Female	Unknown	27755351	26331003	0.9487	13307	0.417043	Blastocyst	Embryo	Blastocyst
SAMEA104410650	PRJEB23699	SINGLE	ILLUMINA	Illumina HiSeq 2000	Sus scrofa	Lanbrace x Pietrain	Lanbrace x Pietrain	Cross	Female	Unknown	30730010	29222283	0.9509	13533	0.424126	Blastocyst	Embryo	Blastocyst
SAMEA104410651	PRJEB23699	SINGLE	ILLUMINA	Illumina HiSeq 2000	Sus scrofa	Lanbrace x Pietrain	Lanbrace x Pietrain	Cross	Female	Unknown	26884949	25676918	0.9551	12951	0.405886	Blastocyst	Embryo	Blastocyst
SAMEA104410652	PRJEB23699	SINGLE	ILLUMINA	Illumina HiSeq 2000	Sus scrofa	Lanbrace x Pietrain	Lanbrace x Pietrain	Cross	Male	Unknown	25161007	24082263	0.9571	13143	0.411903	Blastocyst	Embryo	Blastocyst
SAMEA104410653	PRJEB23699	SINGLE	ILLUMINA	Illumina HiSeq 2000	Sus scrofa	Lanbrace x Pietrain	Lanbrace x Pietrain	Cross	Male	Unknown	27732470	26184483	0.9442	13254	0.415382	Blastocyst	Embryo	Blastocyst
SAMEA104410654	PRJEB23699	SINGLE	ILLUMINA	Illumina HiSeq 2000	Sus scrofa	Lanbrace x Pietrain	Lanbrace x Pietrain	Cross	Male	Unknown	24466712	23507030	0.9608	12999	0.40739	Blastocyst	Embryo	Blastocyst
SAMEA104410655	PRJEB23699	SINGLE	ILLUMINA	Illumina HiSeq 2000	Sus scrofa	Lanbrace x Pietrain	Lanbrace x Pietrain	Cross	Male	Unknown	25046873	23640200	0.9438	12605	0.395042	Blastocyst	Embryo	Blastocyst
SAMEA104410656	PRJEB23699	SINGLE	ILLUMINA	Illumina HiSeq 2000	Sus scrofa	Lanbrace x Pietrain	Lanbrace x Pietrain	Cross	Male	Unknown	28087897	26784094	0.9536	13512	0.423467	Blastocyst	Embryo	Blastocyst
SAMEA104410657	PRJEB23699	SINGLE	ILLUMINA	Illumina HiSeq 2000	Sus scrofa	Lanbrace x Pietrain	Lanbrace x Pietrain	Cross	Male	Unknown	29758485	27948099	0.9392	13066	0.40949	Blastocyst	Embryo	Blastocyst
SAMEA104410658	PRJEB23699	SINGLE	ILLUMINA	Illumina HiSeq 2000	Sus scrofa	Lanbrace x Pietrain	Lanbrace x Pietrain	Cross	Female	Unknown	22652524	21342952	0.9422	12633	0.39592	Blastocyst	Embryo	Blastocyst
SAMEA104410659	PRJEB23699	SINGLE	ILLUMINA	Illumina HiSeq 2000	Sus scrofa	Lanbrace x Pietrain	Lanbrace x Pietrain	Cross	Male	Unknown	24472845	23217966	0.9487	12815	0.401623	Blastocyst	Embryo	Blastocyst
SAMEA104410660	PRJEB23699	SINGLE	ILLUMINA	Illumina HiSeq 2000	Sus scrofa	Lanbrace x Pietrain	Lanbrace x Pietrain	Cross	Male	Unknown	27817146	26504884	0.9528	13228	0.414567	Blastocyst	Embryo	Blastocyst
SAMEA104410661	PRJEB23699	SINGLE	ILLUMINA	Illumina HiSeq 2000	Sus scrofa	Lanbrace x Pietrain	Lanbrace x Pietrain	Cross	Male	Unknown	25180633	23827510	0.9463	12913	0.404695	Blastocyst	Embryo	Blastocyst
SAMEA104410662	PRJEB23699	SINGLE	ILLUMINA	Illumina HiSeq 2000	Sus scrofa	Lanbrace x Pietrain	Lanbrace x Pietrain	Cross	Female	Unknown	23880909	22690184	0.9501	12450	0.390184	Blastocyst	Embryo	Blastocyst
SAMEA104410663	PRJEB23699	SINGLE	ILLUMINA	Illumina HiSeq 2000	Sus scrofa	Lanbrace x Pietrain	Lanbrace x Pietrain	Cross	Female	Unknown	24947719	23874950	0.957	12603	0.394979	Blastocyst	Embryo	Blastocyst
SAMEA104410664	PRJEB23699	SINGLE	ILLUMINA	Illumina HiSeq 2000	Sus scrofa	Lanbrace x Pietrain	Lanbrace x Pietrain	Cross	Female	Unknown	27027861	24729004	0.9149	12610	0.395199	Blastocyst	Embryo	Blastocyst
SAMEA104410665	PRJEB23699	SINGLE	ILLUMINA	Illumina HiSeq 2000	Sus scrofa	Lanbrace x Pietrain	Lanbrace x Pietrain	Cross	Female	Unknown	23894744	22620001	0.9467	12691	0.397737	Blastocyst	Embryo	Blastocyst
SAMEA104410666	PRJEB23699	SINGLE	ILLUMINA	Illumina HiSeq 2000	Sus scrofa	Lanbrace x Pietrain	Lanbrace x Pietrain	Cross	Female	Unknown	22764753	21194935	0.931	12614	0.395324	Blastocyst	Embryo	Blastocyst
SAMEA104410667	PRJEB23699	SINGLE	ILLUMINA	Illumina HiSeq 2000	Sus scrofa	Lanbrace x Pietrain	Lanbrace x Pietrain	Cross	Male	Unknown	25210082	24035044	0.9534	13188	0.413313	Blastocyst	Embryo	Blastocyst
SAMEA104410668	PRJEB23699	SINGLE	ILLUMINA	Illumina HiSeq 2000	Sus scrofa	Lanbrace x Pietrain	Lanbrace x Pietrain	Cross	Male	Unknown	28644723	27196036	0.9494	12502	0.391814	Blastocyst	Embryo	Blastocyst
SAMEA104410669	PRJEB23699	SINGLE	ILLUMINA	Illumina HiSeq 2000	Sus scrofa	Lanbrace x Pietrain	Lanbrace x Pietrain	Cross	Male	Unknown	22656147	21582557	0.9526	12299	0.385452	Blastocyst	Embryo	Blastocyst
SAMEA104459600	PRJEB24165	PAIRED	ILLUMINA	Illumina HiSeq 4000	Sus scrofa	Landrace x Large White	Landrace x Yorkshire	Cross	Male	56 days	36184550	34992599	0.9671	18475	0.579008	Frontal cortex	Brain	Frontal cortex
SAMEA104459601	PRJEB24165	PAIRED	ILLUMINA	Illumina HiSeq 4000	Sus scrofa	Landrace x Large White	Landrace x Yorkshire	Cross	Male	56 days	59031906	57338609	0.9713	19656	0.616021	Frontal cortex	Brain	Frontal cortex
SAMEA104459602	PRJEB24165	PAIRED	ILLUMINA	Illumina HiSeq 4000	Sus scrofa	Landrace x Large White	Landrace x Yorkshire	Cross	Male	56 days	48037117	46443569	0.9668	19120	0.599223	Frontal cortex	Brain	Frontal cortex
SAMEA104459603	PRJEB24165	PAIRED	ILLUMINA	Illumina HiSeq 4000	Sus scrofa	Landrace x Large White	Landrace x Yorkshire	Cross	Male	56 days	38509476	37289203	0.9683	18717	0.586593	Frontal cortex	Brain	Frontal cortex
SAMEA104459604	PRJEB24165	PAIRED	ILLUMINA	Illumina HiSeq 4000	Sus scrofa	Landrace x Large White	Landrace x Yorkshire	Cross	Male	56 days	55724663	54085646	0.9706	19643	0.615614	Frontal cortex	Brain	Frontal cortex
SAMEA104459605	PRJEB24165	PAIRED	ILLUMINA	Illumina HiSeq 4000	Sus scrofa	Landrace x Large White	Landrace x Yorkshire	Cross	Male	56 days	34547184	33332759	0.9648	18387	0.57625	Frontal cortex	Brain	Frontal cortex
SAMEA104459606	PRJEB24165	PAIRED	ILLUMINA	Illumina HiSeq 4000	Sus scrofa	Landrace x Large White	Landrace x Yorkshire	Cross	Male	56 days	58375203	56370544	0.9657	19319	0.605459	Frontal cortex	Brain	Frontal cortex
SAMEA104459607	PRJEB24165	PAIRED	ILLUMINA	Illumina HiSeq 4000	Sus scrofa	Landrace x Large White	Landrace x Yorkshire	Cross	Male	56 days	57089617	55062725	0.9645	19291	0.604582	Frontal cortex	Brain	Frontal cortex
SAMEA104459608	PRJEB24165	PAIRED	ILLUMINA	Illumina HiSeq 4000	Sus scrofa	Landrace x Large White	Landrace x Yorkshire	Cross	Male	56 days	61814098	59754006	0.9667	19611	0.614611	Frontal cortex	Brain	Frontal cortex
SAMEA104459609	PRJEB24165	PAIRED	ILLUMINA	Illumina HiSeq 4000	Sus scrofa	Landrace x Large White	Landrace x Yorkshire	Cross	Male	56 days	65933084	63799555	0.9676	19729	0.618309	Frontal cortex	Brain	Frontal cortex
SAMEA104459610	PRJEB24165	PAIRED	ILLUMINA	Illumina HiSeq 4000	Sus scrofa	Landrace x Large White	Landrace x Yorkshire	Cross	Male	56 days	68648085	66185349	0.9641	19742	0.618716	Frontal cortex	Brain	Frontal cortex
SAMEA104459611	PRJEB24165	PAIRED	ILLUMINA	Illumina HiSeq 4000	Sus scrofa	Landrace x Large White	Landrace x Yorkshire	Cross	Male	56 days	69374360	66903265	0.9644	19780	0.619907	Frontal cortex	Brain	Frontal cortex
SAMEA104459612	PRJEB24165	PAIRED	ILLUMINA	Illumina HiSeq 4000	Sus scrofa	Landrace x Large White	Landrace x Yorkshire	Cross	Male	56 days	31650390	29984341	0.9474	18029	0.565031	Frontal cortex	Brain	Frontal cortex
SAMEA104459613	PRJEB24165	PAIRED	ILLUMINA	Illumina HiSeq 4000	Sus scrofa	Landrace x Large White	Landrace x Yorkshire	Cross	Male	56 days	44667353	43089255	0.9647	18403	0.576752	Frontal cortex	Brain	Frontal cortex
SAMEA104459614	PRJEB24165	PAIRED	ILLUMINA	Illumina HiSeq 4000	Sus scrofa	Landrace x Large White	Landrace x Yorkshire	Cross	Male	56 days	48332238	46738392	0.967	19086	0.598157	Frontal cortex	Brain	Frontal cortex
SAMEA104459615	PRJEB24165	PAIRED	ILLUMINA	Illumina HiSeq 4000	Sus scrofa	Landrace x Large White	Landrace x Yorkshire	Cross	Male	56 days	40836929	39438894	0.9658	18275	0.57274	Frontal cortex	Brain	Frontal cortex
SAMEA104459616	PRJEB24165	PAIRED	ILLUMINA	Illumina HiSeq 4000	Sus scrofa	Landrace x Large White	Landrace x Yorkshire	Cross	Male	56 days	40479356	39180316	0.9679	18732	0.587063	Frontal cortex	Brain	Frontal cortex
SAMEA104459617	PRJEB24165	PAIRED	ILLUMINA	Illumina HiSeq 4000	Sus scrofa	Landrace x Large White	Landrace x Yorkshire	Cross	Male	56 days	45517120	43818487	0.9627	19041	0.596747	Frontal cortex	Brain	Frontal cortex
SAMEA104459618	PRJEB24165	PAIRED	ILLUMINA	Illumina HiSeq 4000	Sus scrofa	Landrace x Large White	Landrace x Yorkshire	Cross	Male	56 days	65469940	63396537	0.9683	19629	0.615175	Frontal cortex	Brain	Frontal cortex
SAMEA104459619	PRJEB24165	PAIRED	ILLUMINA	Illumina HiSeq 4000	Sus scrofa	Landrace x Large White	Landrace x Yorkshire	Cross	Male	56 days	56651245	54625176	0.9642	18826	0.590009	Frontal cortex	Brain	Frontal cortex
SAMEA104459620	PRJEB24165	PAIRED	ILLUMINA	Illumina HiSeq 4000	Sus scrofa	Landrace x Large White	Landrace x Yorkshire	Cross	Male	56 days	55319756	53432444	0.9659	19016	0.595963	Frontal cortex	Brain	Frontal cortex
SAMEA104459621	PRJEB24165	PAIRED	ILLUMINA	Illumina HiSeq 4000	Sus scrofa	Landrace x Large White	Landrace x Yorkshire	Cross	Male	56 days	52292303	50682815	0.9692	19175	0.600946	Frontal cortex	Brain	Frontal cortex
SAMEA104459622	PRJEB24165	PAIRED	ILLUMINA	Illumina HiSeq 4000	Sus scrofa	Landrace x Large White	Landrace x Yorkshire	Cross	Male	56 days	40230607	38932272	0.9677	18955	0.594052	Frontal cortex	Brain	Frontal cortex
SAMEA104459623	PRJEB24165	PAIRED	ILLUMINA	Illumina HiSeq 4000	Sus scrofa	Landrace x Large White	Landrace x Yorkshire	Cross	Male	56 days	39710746	38537317	0.9705	18493	0.579573	Frontal cortex	Brain	Frontal cortex
SAMEA1100143	PRJEB25953	PAIRED	ILLUMINA	Illumina HiSeq 2500	Sus scrofa	Yucatan	Yucatan	American pigs	Male	Unknown	15197259	11960406	0.787	15054	0.471794	Synovial membrane	Synovial membrane	Synovial membrane
SAMEA1100144	PRJEB25953	PAIRED	ILLUMINA	Illumina HiSeq 2500	Sus scrofa	Yucatan	Yucatan	American pigs	Female	Unknown	11540317	8741831	0.7575	14179	0.444371	Synovial membrane	Synovial membrane	Synovial membrane
SAMEA1100145	PRJEB25953	PAIRED	ILLUMINA	Illumina HiSeq 2500	Sus scrofa	Yucatan	Yucatan	American pigs	Male	Unknown	18168347	13003690	0.7157	15158	0.475053	Synovial membrane	Synovial membrane	Synovial membrane
SAMEA1100146	PRJEB25953	PAIRED	ILLUMINA	Illumina HiSeq 2500	Sus scrofa	Yucatan	Yucatan	American pigs	Female	Unknown	19369853	15925861	0.8222	15543	0.487119	Synovial membrane	Synovial membrane	Synovial membrane
SAMEA1100147	PRJEB25953	PAIRED	ILLUMINA	Illumina HiSeq 2500	Sus scrofa	Yucatan	Yucatan	American pigs	Female	Unknown	25144861	20196032	0.8032	15869	0.497336	Synovial membrane	Synovial membrane	Synovial membrane
SAMEA1100148	PRJEB25953	PAIRED	ILLUMINA	Illumina HiSeq 2500	Sus scrofa	Yucatan	Yucatan	American pigs	Male	Unknown	13826313	12160397	0.8795	15029	0.47101	Synovial membrane	Synovial membrane	Synovial membrane
SAMEA1100149	PRJEB25953	PAIRED	ILLUMINA	Illumina HiSeq 2500	Sus scrofa	Yucatan	Yucatan	American pigs	Female	Unknown	13959318	11376564	0.815	14458	0.453115	Synovial membrane	Synovial membrane	Synovial membrane
SAMEA1100150	PRJEB25953	PAIRED	ILLUMINA	Illumina HiSeq 2500	Sus scrofa	Yucatan	Yucatan	American pigs	Male	Unknown	12177025	10690361	0.8779	14238	0.44622	Synovial membrane	Synovial membrane	Synovial membrane
SAMEA1100151	PRJEB25953	PAIRED	ILLUMINA	Illumina HiSeq 2500	Sus scrofa	Yucatan	Yucatan	American pigs	Male	Unknown	15136954	13624410	0.9001	14584	0.457064	Synovial membrane	Synovial membrane	Synovial membrane
SAMEA1100152	PRJEB25953	PAIRED	ILLUMINA	Illumina HiSeq 2500	Sus scrofa	Yucatan	Yucatan	American pigs	Female	Unknown	17815689	15281700	0.8578	14552	0.456061	Synovial membrane	Synovial membrane	Synovial membrane
SAMEA1100153	PRJEB25953	PAIRED	ILLUMINA	Illumina HiSeq 2500	Sus scrofa	Yucatan	Yucatan	American pigs	Male	Unknown	15390160	13334262	0.8664	14716	0.461201	Synovial membrane	Synovial membrane	Synovial membrane
SAMEA1100154	PRJEB25953	PAIRED	ILLUMINA	Illumina HiSeq 2500	Sus scrofa	Yucatan	Yucatan	American pigs	Female	Unknown	12123666	11016693	0.9087	14487	0.454024	Synovial membrane	Synovial membrane	Synovial membrane
SAMEA1100155	PRJEB25953	PAIRED	ILLUMINA	Illumina HiSeq 2500	Sus scrofa	Yucatan	Yucatan	American pigs	Male	Unknown	17948184	15701964	0.8748	15099	0.473204	Synovial membrane	Synovial membrane	Synovial membrane
SAMEA1100156	PRJEB25953	PAIRED	ILLUMINA	Illumina HiSeq 2500	Sus scrofa	Yucatan	Yucatan	American pigs	Female	Unknown	17503325	15029592	0.8587	14997	0.470008	Synovial membrane	Synovial membrane	Synovial membrane
SAMEA1100157	PRJEB25953	PAIRED	ILLUMINA	Illumina HiSeq 2500	Sus scrofa	Yucatan	Yucatan	American pigs	Female	Unknown	15357697	13906096	0.9055	14989	0.469757	Synovial membrane	Synovial membrane	Synovial membrane
SAMEA1100158	PRJEB25953	PAIRED	ILLUMINA	Illumina HiSeq 2500	Sus scrofa	Yucatan	Yucatan	American pigs	Male	Unknown	11279945	10123167	0.8974	14555	0.456155	Synovial membrane	Synovial membrane	Synovial membrane
SAMEA1100159	PRJEB25953	PAIRED	ILLUMINA	Illumina HiSeq 2500	Sus scrofa	Yucatan	Yucatan	American pigs	Male	Unknown	15625605	13619576	0.8716	14862	0.465777	Synovial membrane	Synovial membrane	Synovial membrane
SAMEA1100160	PRJEB25953	PAIRED	ILLUMINA	Illumina HiSeq 2500	Sus scrofa	Yucatan	Yucatan	American pigs	Female	Unknown	9659558	8595382	0.8898	14445	0.452708	Synovial membrane	Synovial membrane	Synovial membrane
SAMEA1100161	PRJEB25953	PAIRED	ILLUMINA	Illumina HiSeq 2500	Sus scrofa	Yucatan	Yucatan	American pigs	Female	Unknown	15871024	14633447	0.922	14981	0.469506	Synovial membrane	Synovial membrane	Synovial membrane
SAMEA1100162	PRJEB25953	PAIRED	ILLUMINA	Illumina HiSeq 2500	Sus scrofa	Yucatan	Yucatan	American pigs	Male	Unknown	15747936	14871078	0.9443	14982	0.469537	Synovial membrane	Synovial membrane	Synovial membrane
SAMEA1100163	PRJEB25953	PAIRED	ILLUMINA	Illumina HiSeq 2500	Sus scrofa	Yucatan	Yucatan	American pigs	Female	Unknown	16686982	15555059	0.9322	15075	0.472452	Synovial membrane	Synovial membrane	Synovial membrane
SAMEA1100164	PRJEB25953	PAIRED	ILLUMINA	Illumina HiSeq 2500	Sus scrofa	Yucatan	Yucatan	American pigs	Male	Unknown	10116298	9145222	0.904	14341	0.449448	Synovial membrane	Synovial membrane	Synovial membrane
SAMEA1100165	PRJEB25953	PAIRED	ILLUMINA	Illumina HiSeq 2500	Sus scrofa	Yucatan	Yucatan	American pigs	Female	Unknown	15914007	14600335	0.9175	14946	0.468409	Synovial membrane	Synovial membrane	Synovial membrane
SAMEA1100166	PRJEB25953	PAIRED	ILLUMINA	Illumina HiSeq 2500	Sus scrofa	Yucatan	Yucatan	American pigs	Male	Unknown	16487037	15195967	0.9217	15316	0.480005	Synovial membrane	Synovial membrane	Synovial membrane
SAMEA1100167	PRJEB25953	PAIRED	ILLUMINA	Illumina HiSeq 2500	Sus scrofa	Yucatan	Yucatan	American pigs	Male	Unknown	13295124	11401054	0.8575	14524	0.455184	Synovial membrane	Synovial membrane	Synovial membrane
SAMEA1100168	PRJEB25953	PAIRED	ILLUMINA	Illumina HiSeq 2500	Sus scrofa	Yucatan	Yucatan	American pigs	Female	Unknown	30991839	26217940	0.846	16258	0.509527	Synovial membrane	Synovial membrane	Synovial membrane
SAMEA1100169	PRJEB25953	PAIRED	ILLUMINA	Illumina HiSeq 2500	Sus scrofa	Yucatan	Yucatan	American pigs	Male	Unknown	14130408	11724545	0.8297	14592	0.457315	Synovial membrane	Synovial membrane	Synovial membrane
SAMEA1100170	PRJEB25953	PAIRED	ILLUMINA	Illumina HiSeq 2500	Sus scrofa	Yucatan	Yucatan	American pigs	Female	Unknown	16744572	14922022	0.8912	15027	0.470948	Synovial membrane	Synovial membrane	Synovial membrane
SAMEA1100171	PRJEB25953	PAIRED	ILLUMINA	Illumina HiSeq 2500	Sus scrofa	Yucatan	Yucatan	American pigs	Female	Unknown	14533726	12707868	0.8744	14837	0.464993	Synovial membrane	Synovial membrane	Synovial membrane
SAMEA1100172	PRJEB25953	PAIRED	ILLUMINA	Illumina HiSeq 2500	Sus scrofa	Yucatan	Yucatan	American pigs	Male	Unknown	4476223	4133557	0.9234	12749	0.399555	Synovial membrane	Synovial membrane	Synovial membrane
SAMEA1100173	PRJEB25953	PAIRED	ILLUMINA	Illumina HiSeq 2500	Sus scrofa	Yucatan	Yucatan	American pigs	Female	Unknown	14081246	13504330	0.959	14650	0.459133	Synovial membrane	Synovial membrane	Synovial membrane
SAMEA1100174	PRJEB25953	PAIRED	ILLUMINA	Illumina HiSeq 2500	Sus scrofa	Yucatan	Yucatan	American pigs	Male	Unknown	10007128	9383978	0.9377	14524	0.455184	Synovial membrane	Synovial membrane	Synovial membrane
SAMEA1100175	PRJEB25953	PAIRED	ILLUMINA	Illumina HiSeq 2500	Sus scrofa	Yucatan	Yucatan	American pigs	Female	Unknown	14094427	13577321	0.9633	14482	0.453867	Synovial membrane	Synovial membrane	Synovial membrane
SAMEA1100176	PRJEB25953	PAIRED	ILLUMINA	Illumina HiSeq 2500	Sus scrofa	Yucatan	Yucatan	American pigs	Male	Unknown	15564872	14930557	0.9592	14646	0.459007	Synovial membrane	Synovial membrane	Synovial membrane
SAMEA1100177	PRJEB25953	PAIRED	ILLUMINA	Illumina HiSeq 2500	Sus scrofa	Yucatan	Yucatan	American pigs	Female	Unknown	11585167	11083267	0.9567	14588	0.457189	Synovial membrane	Synovial membrane	Synovial membrane
SAMEA1100178	PRJEB25953	PAIRED	ILLUMINA	Illumina HiSeq 2500	Sus scrofa	Yucatan	Yucatan	American pigs	Male	Unknown	13109179	12611560	0.962	14782	0.463269	Synovial membrane	Synovial membrane	Synovial membrane
SAMEA1100179	PRJEB25953	PAIRED	ILLUMINA	Illumina HiSeq 2500	Sus scrofa	Yucatan	Yucatan	American pigs	Male	Unknown	15050027	14015626	0.9313	15061	0.472013	Synovial membrane	Synovial membrane	Synovial membrane
SAMEA1100180	PRJEB25953	PAIRED	ILLUMINA	Illumina HiSeq 2500	Sus scrofa	Yucatan	Yucatan	American pigs	Female	Unknown	14214124	13436476	0.9453	14866	0.465902	Synovial membrane	Synovial membrane	Synovial membrane
SAMEA1100181	PRJEB25953	PAIRED	ILLUMINA	Illumina HiSeq 2500	Sus scrofa	Yucatan	Yucatan	American pigs	Female	Unknown	17082382	15572008	0.9116	15301	0.479535	Synovial membrane	Synovial membrane	Synovial membrane
SAMEA1100182	PRJEB25953	PAIRED	ILLUMINA	Illumina HiSeq 2500	Sus scrofa	Yucatan	Yucatan	American pigs	Male	Unknown	52162816	49595265	0.9508	17850	0.559421	Synovial membrane	Synovial membrane	Synovial membrane
SAMEA1100183	PRJEB25953	PAIRED	ILLUMINA	Illumina HiSeq 2500	Sus scrofa	Yucatan	Yucatan	American pigs	Male	Unknown	16636781	15930029	0.9575	15449	0.484173	Synovial membrane	Synovial membrane	Synovial membrane
SAMEA1100184	PRJEB25953	PAIRED	ILLUMINA	Illumina HiSeq 2500	Sus scrofa	Yucatan	Yucatan	American pigs	Female	Unknown	14987295	14320671	0.9555	15151	0.474834	Synovial membrane	Synovial membrane	Synovial membrane
SAMEA4608987	PRJEB26391	PAIRED	ILLUMINA	Illumina HiSeq 4000	Sus scrofa	Unknown	Landrace x Yorkshire	Cross	Female	Unknown	14166573	13234838	0.9342	13573	0.425379	Bone marrow	Bone marrow	Bone marrow
SAMEA4608988	PRJEB26391	PAIRED	ILLUMINA	Illumina HiSeq 4000	Sus scrofa	Unknown	Landrace x Yorkshire	Cross	Female	Unknown	11488233	10837560	0.9434	13489	0.422747	Bone marrow	Bone marrow	Bone marrow
SAMEA4608989	PRJEB26391	PAIRED	ILLUMINA	Illumina HiSeq 4000	Sus scrofa	Unknown	Landrace x Yorkshire	Cross	Female	Unknown	12481625	11660406	0.9342	13475	0.422308	Bone marrow	Bone marrow	Bone marrow
SAMEA4608990	PRJEB26391	PAIRED	ILLUMINA	Illumina HiSeq 4000	Sus scrofa	Unknown	Landrace x Yorkshire	Cross	Female	Unknown	12119269	11449941	0.9448	13614	0.426664	Bone marrow	Bone marrow	Bone marrow
SAMEA4608991	PRJEB26391	PAIRED	ILLUMINA	Illumina HiSeq 4000	Sus scrofa	Unknown	Landrace x Yorkshire	Cross	Female	Unknown	16559011	15521988	0.9374	14077	0.441175	Bone marrow	Bone marrow	Bone marrow
SAMEA4608992	PRJEB26391	PAIRED	ILLUMINA	Illumina HiSeq 4000	Sus scrofa	Unknown	Landrace x Yorkshire	Cross	Female	Unknown	21195060	19886570	0.9383	14597	0.457471	Bone marrow	Bone marrow	Bone marrow
SAMEA4608993	PRJEB26391	PAIRED	ILLUMINA	Illumina HiSeq 4000	Sus scrofa	Unknown	Landrace x Yorkshire	Cross	Female	Unknown	13139392	12219110	0.93	13510	0.423405	Bone marrow	Bone marrow	Bone marrow
SAMEA4608994	PRJEB26391	PAIRED	ILLUMINA	Illumina HiSeq 4000	Sus scrofa	Unknown	Landrace x Yorkshire	Cross	Female	Unknown	13789759	13072242	0.948	13690	0.429046	Bone marrow	Bone marrow	Bone marrow
SAMEA4608995	PRJEB26391	PAIRED	ILLUMINA	Illumina HiSeq 4000	Sus scrofa	Unknown	Landrace x Yorkshire	Cross	Female	Unknown	15645208	14865800	0.9502	13730	0.4303	Bone marrow	Bone marrow	Bone marrow
SAMEA4608996	PRJEB26391	PAIRED	ILLUMINA	Illumina HiSeq 4000	Sus scrofa	Unknown	Landrace x Yorkshire	Cross	Female	Unknown	12514398	11559934	0.9237	13387	0.41955	Bone marrow	Bone marrow	Bone marrow
SAMEA4608997	PRJEB26391	PAIRED	ILLUMINA	Illumina HiSeq 4000	Sus scrofa	Unknown	Landrace x Yorkshire	Cross	Female	Unknown	14742440	13726941	0.9311	13844	0.433872	Bone marrow	Bone marrow	Bone marrow
SAMEA4608998	PRJEB26391	PAIRED	ILLUMINA	Illumina HiSeq 4000	Sus scrofa	Unknown	Landrace x Yorkshire	Cross	Female	Unknown	20847010	19648282	0.9425	14286	0.447725	Bone marrow	Bone marrow	Bone marrow
SAMEA4608999	PRJEB26391	PAIRED	ILLUMINA	Illumina HiSeq 4000	Sus scrofa	Unknown	Landrace x Yorkshire	Cross	Female	Unknown	16339530	15488477	0.9479	14246	0.446471	Bone marrow	Bone marrow	Bone marrow
SAMEA4609000	PRJEB26391	PAIRED	ILLUMINA	Illumina HiSeq 4000	Sus scrofa	Unknown	Landrace x Yorkshire	Cross	Female	Unknown	15001270	14199821	0.9466	14204	0.445155	Bone marrow	Bone marrow	Bone marrow
SAMEA4609001	PRJEB26391	PAIRED	ILLUMINA	Illumina HiSeq 4000	Sus scrofa	Unknown	Landrace x Yorkshire	Cross	Female	Unknown	14363021	13434240	0.9353	13711	0.429704	Bone marrow	Bone marrow	Bone marrow
SAMEA4609002	PRJEB26391	PAIRED	ILLUMINA	Illumina HiSeq 4000	Sus scrofa	Unknown	Landrace x Yorkshire	Cross	Female	Unknown	14290096	13404213	0.938	13847	0.433966	Bone marrow	Bone marrow	Bone marrow
SAMEA4609003	PRJEB26391	PAIRED	ILLUMINA	Illumina HiSeq 4000	Sus scrofa	Unknown	Landrace x Yorkshire	Cross	Female	Unknown	12349357	11730121	0.9499	13750	0.430926	Bone marrow	Bone marrow	Bone marrow
SAMEA4609004	PRJEB26391	PAIRED	ILLUMINA	Illumina HiSeq 4000	Sus scrofa	Unknown	Landrace x Yorkshire	Cross	Female	Unknown	15966343	15023028	0.9409	14116	0.442397	Bone marrow	Bone marrow	Bone marrow
SAMEA4681588	PRJEB26923	SINGLE	ILLUMINA	Illumina HiSeq 4000	Sus scrofa	Unknown	Landrace x Yorkshire	Cross	Female	3 weeks	294338807	275521345	0.9361	15607	0.489125	Bone marrow	Bone marrow	Bone marrow
SAMEA4681589	PRJEB26923	SINGLE	ILLUMINA	Illumina HiSeq 4000	Sus scrofa	Unknown	Landrace x Yorkshire	Cross	Female	3 weeks	309902368	289065391	0.9328	15558	0.487589	Bone marrow	Bone marrow	Bone marrow
SAMEA4681590	PRJEB26923	SINGLE	ILLUMINA	Illumina HiSeq 4000	Sus scrofa	Unknown	Landrace x Yorkshire	Cross	Female	3 weeks	279756121	261978992	0.9365	15161	0.475147	Bone marrow	Bone marrow	Bone marrow
SAMEA4681591	PRJEB26923	SINGLE	ILLUMINA	Illumina HiSeq 4000	Sus scrofa	Unknown	Landrace x Yorkshire	Cross	Female	3 weeks	267278529	249032429	0.9317	15760	0.49392	Bone marrow	Bone marrow	Bone marrow
SAMEA4681592	PRJEB26923	SINGLE	ILLUMINA	Illumina HiSeq 4000	Sus scrofa	Unknown	Landrace x Yorkshire	Cross	Female	3 weeks	298626095	278283102	0.9319	15510	0.486085	Bone marrow	Bone marrow	Bone marrow
SAMEA4681593	PRJEB26923	SINGLE	ILLUMINA	Illumina HiSeq 4000	Sus scrofa	Unknown	Landrace x Yorkshire	Cross	Female	3 weeks	307477751	287243826	0.9342	15195	0.476213	Bone marrow	Bone marrow	Bone marrow
SAMEA4681594	PRJEB26923	SINGLE	ILLUMINA	Illumina HiSeq 4000	Sus scrofa	Unknown	Landrace x Yorkshire	Cross	Female	3 weeks	278929572	259432379	0.9301	15046	0.471543	Bone marrow	Bone marrow	Bone marrow
SAMEA4681595	PRJEB26923	SINGLE	ILLUMINA	Illumina HiSeq 4000	Sus scrofa	Unknown	Landrace x Yorkshire	Cross	Female	3 weeks	300891765	279852140	0.9301	15602	0.488968	Bone marrow	Bone marrow	Bone marrow
SAMEA4681596	PRJEB26923	SINGLE	ILLUMINA	Illumina HiSeq 4000	Sus scrofa	Unknown	Landrace x Yorkshire	Cross	Female	3 weeks	279790511	262446709	0.938	14831	0.464805	Bone marrow	Bone marrow	Bone marrow
SAMEA4681597	PRJEB26923	SINGLE	ILLUMINA	Illumina HiSeq 4000	Sus scrofa	Unknown	Landrace x Yorkshire	Cross	Female	3 weeks	285105065	268114450	0.9404	14772	0.462956	Bone marrow	Bone marrow	Bone marrow
SAMEA4681598	PRJEB26923	SINGLE	ILLUMINA	Illumina HiSeq 4000	Sus scrofa	Unknown	Landrace x Yorkshire	Cross	Female	3 weeks	263063213	247435149	0.9406	14529	0.45534	Bone marrow	Bone marrow	Bone marrow
SAMEA4681599	PRJEB26923	SINGLE	ILLUMINA	Illumina HiSeq 4000	Sus scrofa	Unknown	Landrace x Yorkshire	Cross	Female	3 weeks	278349235	259991083	0.934	15290	0.47919	Bone marrow	Bone marrow	Bone marrow
SAMEA4681600	PRJEB26923	SINGLE	ILLUMINA	Illumina HiSeq 4000	Sus scrofa	Unknown	Landrace x Yorkshire	Cross	Female	2 weeks	263900454	238470396	0.9036	15562	0.487715	Bone marrow	Bone marrow	Bone marrow
SAMEA4681601	PRJEB26923	SINGLE	ILLUMINA	Illumina HiSeq 4000	Sus scrofa	Unknown	Landrace x Yorkshire	Cross	Female	2 weeks	269671083	243764125	0.9039	15934	0.499373	Bone marrow	Bone marrow	Bone marrow
SAMEA103989648	PRJEB27455	PAIRED	ILLUMINA	Illumina HiSeq 3000	Sus scrofa	Unknown	Unknown	Unknown	Unknown	593 days	109116256	105130906	0.9635	19649	0.615802	Liver	Liver	Liver	Embargoed
SAMEA103989993	PRJEB27455	PAIRED	ILLUMINA	Illumina HiSeq 3000	Sus scrofa	Unknown	Unknown	Unknown	Unknown	593 days	105144451	101548500	0.9658	19326	0.605679	Liver	Liver	Liver	Embargoed
SAMEA103990030	PRJEB27455	PAIRED	ILLUMINA	Illumina HiSeq 3000	Sus scrofa	Unknown	Unknown	Unknown	Unknown	593 days	110635037	106669579	0.9642	19929	0.624577	Liver	Liver	Liver	Embargoed
SAMEA103990890	PRJEB27455	PAIRED	ILLUMINA	Illumina HiSeq 3000	Sus scrofa	Unknown	Unknown	Unknown	Unknown	593 days	112488463	107544265	0.956	19877	0.622947	Liver	Liver	Liver	Embargoed
SAMEA1088320	PRJEB27455	PAIRED	ILLUMINA	Illumina HiSeq 3000	Sus scrofa	Unknown	Unknown	Unknown	Unknown	Unknown	111900507	105608676	0.9438	17735	0.555817	CD4+ T cell	Other	Other	Embargoed
SAMEA1088323	PRJEB27455	PAIRED	ILLUMINA	Illumina HiSeq 3000	Sus scrofa	Unknown	Unknown	Unknown	Unknown	Unknown	221528568	211711773	0.9557	18274	0.572709	CD8+ T cell	Other	Other	Embargoed
SAMEA1088325	PRJEB27455	PAIRED	ILLUMINA	Illumina HiSeq 3000	Sus scrofa	Unknown	Unknown	Unknown	Unknown	Unknown	112007343	106125801	0.9475	16656	0.522001	CD4+ T cell	Other	Other	Embargoed
SAMEA1088337	PRJEB27455	PAIRED	ILLUMINA	Illumina HiSeq 3000	Sus scrofa	Unknown	Unknown	Unknown	Unknown	Unknown	112380207	106905999	0.9513	18316	0.574025	CD8+ T cell	Other	Other	Embargoed
SAMEA1088341	PRJEB27455	PAIRED	ILLUMINA	Illumina HiSeq 3000	Sus scrofa	Unknown	Unknown	Unknown	Unknown	Unknown	109608912	104808140	0.9562	16354	0.512536	CD4+ T cell	Other	Other	Embargoed
SAMEA1088343	PRJEB27455	PAIRED	ILLUMINA	Illumina HiSeq 3000	Sus scrofa	Unknown	Unknown	Unknown	Unknown	Unknown	112030481	107042402	0.9555	16810	0.526827	CD8+ T cell	Other	Other	Embargoed
SAMEA1088362	PRJEB27455	PAIRED	ILLUMINA	Illumina HiSeq 3000	Sus scrofa	Unknown	Unknown	Unknown	Unknown	Unknown	112915839	105231836	0.9319	16536	0.51824	CD8+ T cell	Other	Other	Embargoed
SAMEA4837075	PRJEB28262	PAIRED	ILLUMINA	Illumina HiSeq 2500	Sus scrofa	Unknown	Landrace x Yorkshire	Cross	Unknown	Unknown	32921765	31654569	0.9615	14560	0.456312	Muscle	Muscle	Muscle
SAMEA4837076	PRJEB28262	PAIRED	ILLUMINA	Illumina HiSeq 2500	Sus scrofa	Unknown	Landrace x Yorkshire	Cross	Unknown	Unknown	32385397	30763981	0.9499	13414	0.420396	Muscle	Muscle	Muscle
SAMEA4837077	PRJEB28262	PAIRED	ILLUMINA	Illumina HiSeq 2500	Sus scrofa	Unknown	Landrace x Yorkshire	Cross	Unknown	Unknown	27293878	25924202	0.9498	14287	0.447756	Muscle	Muscle	Muscle
SAMEA4837078	PRJEB28262	PAIRED	ILLUMINA	Illumina HiSeq 2500	Sus scrofa	Unknown	Landrace x Yorkshire	Cross	Unknown	Unknown	31499282	29920704	0.9499	13155	0.412279	Muscle	Muscle	Muscle
SAMEA4837079	PRJEB28262	PAIRED	ILLUMINA	Illumina HiSeq 2500	Sus scrofa	Unknown	Landrace x Yorkshire	Cross	Unknown	Unknown	34380809	32708247	0.9514	14179	0.444371	Muscle	Muscle	Muscle
SAMEA4837080	PRJEB28262	PAIRED	ILLUMINA	Illumina HiSeq 2500	Sus scrofa	Unknown	Landrace x Yorkshire	Cross	Unknown	Unknown	34199412	32458618	0.9491	13243	0.415037	Muscle	Muscle	Muscle
SAMEA4837081	PRJEB28262	PAIRED	ILLUMINA	Illumina HiSeq 2500	Sus scrofa	Unknown	Landrace x Yorkshire	Cross	Unknown	Unknown	33750493	32519809	0.9635	13310	0.417137	Muscle	Muscle	Muscle
SAMEA4837082	PRJEB28262	PAIRED	ILLUMINA	Illumina HiSeq 2500	Sus scrofa	Unknown	Landrace x Yorkshire	Cross	Unknown	Unknown	29361333	27854846	0.9487	14138	0.443086	Muscle	Muscle	Muscle
SAMEA4837083	PRJEB28262	PAIRED	ILLUMINA	Illumina HiSeq 2500	Sus scrofa	Unknown	Landrace x Yorkshire	Cross	Unknown	Unknown	28562709	27122946	0.9496	13640	0.427479	Muscle	Muscle	Muscle
SAMEA4837084	PRJEB28262	PAIRED	ILLUMINA	Illumina HiSeq 2500	Sus scrofa	Unknown	Landrace x Yorkshire	Cross	Unknown	Unknown	32312698	30171826	0.9337	15328	0.480381	Muscle	Muscle	Muscle
SAMEA4837085	PRJEB28262	PAIRED	ILLUMINA	Illumina HiSeq 2500	Sus scrofa	Unknown	Landrace x Yorkshire	Cross	Unknown	Unknown	39149116	37040790	0.9461	15413	0.483045	Muscle	Muscle	Muscle
SAMEA4837086	PRJEB28262	PAIRED	ILLUMINA	Illumina HiSeq 2500	Sus scrofa	Unknown	Landrace x Yorkshire	Cross	Unknown	Unknown	36627972	34742137	0.9485	13941	0.436912	Muscle	Muscle	Muscle
SAMEA4837087	PRJEB28262	PAIRED	ILLUMINA	Illumina HiSeq 2500	Sus scrofa	Unknown	Landrace x Yorkshire	Cross	Unknown	Unknown	28216216	26779177	0.9491	13724	0.430112	Muscle	Muscle	Muscle
SAMEA4837088	PRJEB28262	PAIRED	ILLUMINA	Illumina HiSeq 2500	Sus scrofa	Unknown	Landrace x Yorkshire	Cross	Unknown	Unknown	29889420	27899288	0.9334	14336	0.449292	Muscle	Muscle	Muscle
SAMEA4837089	PRJEB28262	PAIRED	ILLUMINA	Illumina HiSeq 2500	Sus scrofa	Unknown	Landrace x Yorkshire	Cross	Unknown	Unknown	28709845	26747058	0.9316	14027	0.439608	Muscle	Muscle	Muscle
SAMEA4837090	PRJEB28262	PAIRED	ILLUMINA	Illumina HiSeq 2500	Sus scrofa	Unknown	Landrace x Yorkshire	Cross	Unknown	Unknown	33210636	31858179	0.9593	13392	0.419707	Muscle	Muscle	Muscle
SAMEA4837091	PRJEB28262	PAIRED	ILLUMINA	Illumina HiSeq 2500	Sus scrofa	Unknown	Landrace x Yorkshire	Cross	Unknown	Unknown	24108924	22912775	0.9504	13248	0.415194	Muscle	Muscle	Muscle
SAMEA4837092	PRJEB28262	PAIRED	ILLUMINA	Illumina HiSeq 2500	Sus scrofa	Unknown	Landrace x Yorkshire	Cross	Unknown	Unknown	33724723	31449135	0.9325	15630	0.489846	Muscle	Muscle	Muscle
SAMEA4837093	PRJEB28262	PAIRED	ILLUMINA	Illumina HiSeq 2500	Sus scrofa	Unknown	Landrace x Yorkshire	Cross	Unknown	Unknown	38848222	36909259	0.9501	15316	0.480005	Muscle	Muscle	Muscle
SAMEA4837094	PRJEB28262	PAIRED	ILLUMINA	Illumina HiSeq 2500	Sus scrofa	Unknown	Landrace x Yorkshire	Cross	Unknown	Unknown	29545335	28163188	0.9532	12060	0.377962	Muscle	Muscle	Muscle
SAMEA4837095	PRJEB28262	PAIRED	ILLUMINA	Illumina HiSeq 2500	Sus scrofa	Unknown	Unknown	Unknown	Unknown	Unknown	34232545	32423477	0.9472	13988	0.438385	Muscle	Muscle	Muscle
SAMEA4837096	PRJEB28262	PAIRED	ILLUMINA	Illumina HiSeq 2500	Sus scrofa	Unknown	Landrace x Yorkshire	Cross	Unknown	Unknown	34471370	32773205	0.9507	15290	0.47919	Muscle	Muscle	Muscle
SAMEA4837097	PRJEB28262	PAIRED	ILLUMINA	Illumina HiSeq 2500	Sus scrofa	Unknown	Landrace x Yorkshire	Cross	Unknown	Unknown	31117282	29622222	0.952	13681	0.428764	Muscle	Muscle	Muscle
SAMEA4837098	PRJEB28262	PAIRED	ILLUMINA	Illumina HiSeq 2500	Sus scrofa	Unknown	Landrace x Yorkshire	Cross	Unknown	Unknown	36747137	34961305	0.9514	13802	0.432556	Muscle	Muscle	Muscle
SAMEA4837099	PRJEB28262	PAIRED	ILLUMINA	Illumina HiSeq 2500	Sus scrofa	Unknown	Landrace x Yorkshire	Cross	Unknown	Unknown	32333283	30393380	0.94	14541	0.455716	Muscle	Muscle	Muscle
SAMEA4837100	PRJEB28262	PAIRED	ILLUMINA	Illumina HiSeq 2500	Sus scrofa	Unknown	Landrace x Yorkshire	Cross	Unknown	Unknown	36531030	34497864	0.9443	13910	0.435941	Muscle	Muscle	Muscle
SAMEA4837101	PRJEB28262	PAIRED	ILLUMINA	Illumina HiSeq 2500	Sus scrofa	Unknown	Landrace x Yorkshire	Cross	Unknown	Unknown	32840580	31195096	0.9499	13991	0.438479	Muscle	Muscle	Muscle
SAMEA4837102	PRJEB28262	PAIRED	ILLUMINA	Illumina HiSeq 2500	Sus scrofa	Unknown	Landrace x Yorkshire	Cross	Unknown	Unknown	29317923	28135443	0.9597	12970	0.406481	Muscle	Muscle	Muscle
SAMEA4837103	PRJEB28262	PAIRED	ILLUMINA	Illumina HiSeq 2500	Sus scrofa	Unknown	Landrace x Yorkshire	Cross	Unknown	Unknown	30586628	28767388	0.9405	14814	0.464272	Muscle	Muscle	Muscle
SAMEA4837104	PRJEB28262	PAIRED	ILLUMINA	Illumina HiSeq 2500	Sus scrofa	Unknown	Landrace x Yorkshire	Cross	Unknown	Unknown	31021878	29526214	0.9518	13870	0.434687	Muscle	Muscle	Muscle
SAMEA4837105	PRJEB28262	PAIRED	ILLUMINA	Illumina HiSeq 2500	Sus scrofa	Unknown	Landrace x Yorkshire	Cross	Unknown	Unknown	37167183	34950802	0.9404	14703	0.460794	Muscle	Muscle	Muscle
SAMEA4837106	PRJEB28262	PAIRED	ILLUMINA	Illumina HiSeq 2500	Sus scrofa	Unknown	Landrace x Yorkshire	Cross	Unknown	Unknown	25976020	24901932	0.9587	13846	0.433935	Muscle	Muscle	Muscle
SAMEA4837107	PRJEB28262	PAIRED	ILLUMINA	Illumina HiSeq 2500	Sus scrofa	Unknown	Landrace x Yorkshire	Cross	Unknown	Unknown	28535944	27187244	0.9527	13697	0.429265	Muscle	Muscle	Muscle
SAMEA4837108	PRJEB28262	PAIRED	ILLUMINA	Illumina HiSeq 2500	Sus scrofa	Unknown	Landrace x Yorkshire	Cross	Unknown	Unknown	30229222	28744212	0.9509	14010	0.439075	Muscle	Muscle	Muscle
SAMEA4837109	PRJEB28262	PAIRED	ILLUMINA	Illumina HiSeq 2500	Sus scrofa	Unknown	Landrace x Yorkshire	Cross	Unknown	Unknown	24510297	22980660	0.9376	14254	0.446722	Muscle	Muscle	Muscle
SAMEA4837110	PRJEB28262	PAIRED	ILLUMINA	Illumina HiSeq 2500	Sus scrofa	Unknown	Landrace x Yorkshire	Cross	Unknown	Unknown	34568062	32213623	0.9319	14494	0.454243	Muscle	Muscle	Muscle
SAMEA4837111	PRJEB28262	PAIRED	ILLUMINA	Illumina HiSeq 2500	Sus scrofa	Unknown	Landrace x Yorkshire	Cross	Unknown	Unknown	27770355	26496676	0.9541	13221	0.414347	Muscle	Muscle	Muscle
SAMEA4837112	PRJEB28262	PAIRED	ILLUMINA	Illumina HiSeq 2500	Sus scrofa	Unknown	Landrace x Yorkshire	Cross	Unknown	Unknown	35497315	34122100	0.9613	13009	0.407703	Muscle	Muscle	Muscle
SAMEA4837113	PRJEB28262	PAIRED	ILLUMINA	Illumina HiSeq 2500	Sus scrofa	Unknown	Landrace x Yorkshire	Cross	Unknown	Unknown	29532282	28032216	0.9492	13762	0.431302	Muscle	Muscle	Muscle
SAMEA4837114	PRJEB28262	PAIRED	ILLUMINA	Illumina HiSeq 2500	Sus scrofa	Unknown	Landrace x Yorkshire	Cross	Unknown	Unknown	31329764	29923725	0.9551	13821	0.433152	Muscle	Muscle	Muscle
SAMEA4837115	PRJEB28262	PAIRED	ILLUMINA	Illumina HiSeq 2500	Sus scrofa	Unknown	Landrace x Yorkshire	Cross	Unknown	Unknown	34803105	33100525	0.9511	15125	0.474019	Muscle	Muscle	Muscle
SAMEA4837116	PRJEB28262	PAIRED	ILLUMINA	Illumina HiSeq 2500	Sus scrofa	Unknown	Landrace x Yorkshire	Cross	Unknown	Unknown	29235295	27690526	0.9472	14242	0.446346	Muscle	Muscle	Muscle
SAMEA4837117	PRJEB28262	PAIRED	ILLUMINA	Illumina HiSeq 2500	Sus scrofa	Unknown	Landrace x Yorkshire	Cross	Unknown	Unknown	30343510	29168665	0.9613	13722	0.430049	Muscle	Muscle	Muscle
SAMEA4837118	PRJEB28262	PAIRED	ILLUMINA	Illumina HiSeq 2500	Sus scrofa	Unknown	Landrace x Yorkshire	Cross	Unknown	Unknown	91177041	86083292	0.9441	17005	0.532938	Muscle	Muscle	Muscle
SAMEA4837119	PRJEB28262	PAIRED	ILLUMINA	Illumina HiSeq 2500	Sus scrofa	Unknown	Landrace x Yorkshire	Cross	Unknown	Unknown	30383178	29152329	0.9595	12945	0.405698	Muscle	Muscle	Muscle
SAMEA4881075	PRJEB28465	PAIRED	ILLUMINA	Illumina HiSeq 2500	Sus scrofa	Large white	Yorkshire	European pigs	Male	287 days	14144218	13474176	0.9526	12732	0.399022	Muscle	Muscle	Muscle
SAMEA4881076	PRJEB28465	PAIRED	ILLUMINA	Illumina HiSeq 2500	Sus scrofa	Large white	Yorkshire	European pigs	Male	289 days	10834228	10310806	0.9517	11903	0.373041	Muscle	Muscle	Muscle
SAMEA4881077	PRJEB28465	PAIRED	ILLUMINA	Illumina HiSeq 2500	Sus scrofa	Large white	Yorkshire	European pigs	Male	276 days	18223676	17118571	0.9394	13584	0.425724	Muscle	Muscle	Muscle
SAMEA4881078	PRJEB28465	PAIRED	ILLUMINA	Illumina HiSeq 2500	Sus scrofa	Large white	Yorkshire	European pigs	Female	274 days	18733857	17686626	0.9441	14033	0.439796	Muscle	Muscle	Muscle
SAMEA4881079	PRJEB28465	PAIRED	ILLUMINA	Illumina HiSeq 2500	Sus scrofa	Large white	Yorkshire	European pigs	Female	288 days	11442417	10774623	0.9416	12939	0.40551	Muscle	Muscle	Muscle
SAMEA4881080	PRJEB28465	PAIRED	ILLUMINA	Illumina HiSeq 2500	Sus scrofa	Large white	Yorkshire	European pigs	Male	289 days	11775444	11149740	0.9469	12979	0.406763	Muscle	Muscle	Muscle
SAMEA4881081	PRJEB28465	PAIRED	ILLUMINA	Illumina HiSeq 2500	Sus scrofa	Large white	Yorkshire	European pigs	Male	287 days	11434630	10786263	0.9433	13053	0.409082	Muscle	Muscle	Muscle
SAMEA4881082	PRJEB28465	PAIRED	ILLUMINA	Illumina HiSeq 2500	Sus scrofa	Large white	Yorkshire	European pigs	Female	275 days	12659718	11933523	0.9426	13094	0.410367	Muscle	Muscle	Muscle
SAMEA4881083	PRJEB28465	PAIRED	ILLUMINA	Illumina HiSeq 2500	Sus scrofa	Large white	Yorkshire	European pigs	Male	274 days	14845048	14004453	0.9434	13416	0.420459	Muscle	Muscle	Muscle
SAMEA4881084	PRJEB28465	PAIRED	ILLUMINA	Illumina HiSeq 2500	Sus scrofa	Large white	Yorkshire	European pigs	Male	275 days	12095804	11470314	0.9483	13074	0.409741	Muscle	Muscle	Muscle
SAMEA4881085	PRJEB28465	PAIRED	ILLUMINA	Illumina HiSeq 2500	Sus scrofa	Large white	Yorkshire	European pigs	Female	275 days	15282412	14434410	0.9445	13495	0.422935	Muscle	Muscle	Muscle
SAMEA4881086	PRJEB28465	PAIRED	ILLUMINA	Illumina HiSeq 2500	Sus scrofa	Large white	Yorkshire	European pigs	Male	273 days	15804198	14869791	0.9409	13805	0.43265	Muscle	Muscle	Muscle
SAMEA4881087	PRJEB28465	PAIRED	ILLUMINA	Illumina HiSeq 2500	Sus scrofa	Large white	Yorkshire	European pigs	Male	288 days	16538467	15495912	0.937	14037	0.439921	Muscle	Muscle	Muscle
SAMEA4881088	PRJEB28465	PAIRED	ILLUMINA	Illumina HiSeq 2500	Sus scrofa	Large white	Yorkshire	European pigs	Female	275 days	18574025	17366583	0.935	14425	0.452081	Muscle	Muscle	Muscle
SAMEA4881089	PRJEB28465	PAIRED	ILLUMINA	Illumina HiSeq 2500	Sus scrofa	Large white	Yorkshire	European pigs	Female	288 days	14663001	13821982	0.9426	12230	0.383289	Muscle	Muscle	Muscle
SAMEA4881090	PRJEB28465	PAIRED	ILLUMINA	Illumina HiSeq 2500	Sus scrofa	Large white	Yorkshire	European pigs	Male	288 days	10645556	10032049	0.9424	12205	0.382506	Muscle	Muscle	Muscle
SAMEA4881091	PRJEB28465	PAIRED	ILLUMINA	Illumina HiSeq 2500	Sus scrofa	Large white	Yorkshire	European pigs	Male	278 days	14360999	13621658	0.9485	12585	0.394415	Muscle	Muscle	Muscle
SAMEA4881092	PRJEB28465	PAIRED	ILLUMINA	Illumina HiSeq 2500	Sus scrofa	Large white	Yorkshire	European pigs	Male	292 days	16390808	15438988	0.9419	12471	0.390842	Muscle	Muscle	Muscle
SAMEA4881093	PRJEB28465	PAIRED	ILLUMINA	Illumina HiSeq 2500	Sus scrofa	Large white	Yorkshire	European pigs	Female	287 days	12227090	11584539	0.9474	12939	0.40551	Muscle	Muscle	Muscle
SAMEA4881094	PRJEB28465	PAIRED	ILLUMINA	Illumina HiSeq 2500	Sus scrofa	Large white	Yorkshire	European pigs	Female	275 days	14888603	13995737	0.94	12901	0.404319	Muscle	Muscle	Muscle
SAMEA4881095	PRJEB28465	PAIRED	ILLUMINA	Illumina HiSeq 2500	Sus scrofa	Large white	Yorkshire	European pigs	Female	292 days	13269935	12551459	0.9459	13218	0.414253	Muscle	Muscle	Muscle
SAMEA4881096	PRJEB28465	PAIRED	ILLUMINA	Illumina HiSeq 2500	Sus scrofa	Large white	Yorkshire	European pigs	Female	292 days	16071971	15028323	0.9351	13259	0.415538	Muscle	Muscle	Muscle
SAMEA4881097	PRJEB28465	PAIRED	ILLUMINA	Illumina HiSeq 2500	Sus scrofa	Large white	Yorkshire	European pigs	Male	292 days	10965560	10345880	0.9435	12051	0.37768	Muscle	Muscle	Muscle
SAMEA4881098	PRJEB28465	PAIRED	ILLUMINA	Illumina HiSeq 2500	Sus scrofa	Large white	Yorkshire	European pigs	Female	292 days	16134878	15211881	0.9428	12484	0.39125	Muscle	Muscle	Muscle
SAMEA4881099	PRJEB28465	PAIRED	ILLUMINA	Illumina HiSeq 2500	Sus scrofa	Large white	Yorkshire	European pigs	Male	292 days	13386053	12668151	0.9464	12878	0.403598	Muscle	Muscle	Muscle
SAMEA4881100	PRJEB28465	PAIRED	ILLUMINA	Illumina HiSeq 2500	Sus scrofa	Large white	Yorkshire	European pigs	Female	289 days	15999943	15010934	0.9382	12921	0.404945	Muscle	Muscle	Muscle
SAMEA4881101	PRJEB28465	PAIRED	ILLUMINA	Illumina HiSeq 2500	Sus scrofa	Large white	Yorkshire	European pigs	Male	278 days	15661661	14683023	0.9375	13636	0.427354	Muscle	Muscle	Muscle
SAMEA4881102	PRJEB28465	PAIRED	ILLUMINA	Illumina HiSeq 2500	Sus scrofa	Large white	Yorkshire	European pigs	Female	289 days	14125971	13416590	0.9498	13383	0.419425	Muscle	Muscle	Muscle
SAMEA4881103	PRJEB28465	PAIRED	ILLUMINA	Illumina HiSeq 2500	Sus scrofa	Large white	Yorkshire	European pigs	Female	287 days	10498900	9866652	0.9398	11792	0.369562	Muscle	Muscle	Muscle
SAMEA4881104	PRJEB28465	PAIRED	ILLUMINA	Illumina HiSeq 2500	Sus scrofa	Large white	Yorkshire	European pigs	Male	292 days	14095081	13219282	0.9379	12248	0.383854	Muscle	Muscle	Muscle
SAMEA4881105	PRJEB28465	PAIRED	ILLUMINA	Illumina HiSeq 2500	Sus scrofa	Large white	Yorkshire	European pigs	Female	276 days	11197632	10571989	0.9441	12827	0.401999	Muscle	Muscle	Muscle
SAMEA4881106	PRJEB28465	PAIRED	ILLUMINA	Illumina HiSeq 2500	Sus scrofa	Large white	Yorkshire	European pigs	Female	289 days	11610402	11045631	0.9514	12170	0.381409	Muscle	Muscle	Muscle
SAMEA4881107	PRJEB28465	PAIRED	ILLUMINA	Illumina HiSeq 2500	Sus scrofa	Large white	Yorkshire	European pigs	Male	289 days	12086927	11516115	0.9528	13662	0.428168	Muscle	Muscle	Muscle
SAMEA4881108	PRJEB28465	PAIRED	ILLUMINA	Illumina HiSeq 2500	Sus scrofa	Large white	Yorkshire	European pigs	Male	276 days	13493852	12768416	0.9462	11796	0.369688	Muscle	Muscle	Muscle
SAMEA4881109	PRJEB28465	PAIRED	ILLUMINA	Illumina HiSeq 2500	Sus scrofa	Large white	Yorkshire	European pigs	Female	272 days	15978124	15059808	0.9425	13411	0.420302	Muscle	Muscle	Muscle
SAMEA4881110	PRJEB28465	PAIRED	ILLUMINA	Illumina HiSeq 2500	Sus scrofa	Large white	Yorkshire	European pigs	Male	272 days	16250562	15382615	0.9466	13994	0.438573	Muscle	Muscle	Muscle
SAMEA4881111	PRJEB28465	PAIRED	ILLUMINA	Illumina HiSeq 2500	Sus scrofa	Large white	Yorkshire	European pigs	Female	278 days	15891351	14953709	0.941	13342	0.41814	Muscle	Muscle	Muscle
SAMEA4881112	PRJEB28465	PAIRED	ILLUMINA	Illumina HiSeq 2500	Sus scrofa	Large white	Yorkshire	European pigs	Male	291 days	10432299	9833459	0.9426	11757	0.368466	Muscle	Muscle	Muscle
SAMEA4881113	PRJEB28465	PAIRED	ILLUMINA	Illumina HiSeq 2500	Sus scrofa	Large white	Yorkshire	European pigs	Female	276 days	14365191	13616627	0.9479	13788	0.432117	Muscle	Muscle	Muscle
SAMEA4881114	PRJEB28465	PAIRED	ILLUMINA	Illumina HiSeq 2500	Sus scrofa	Large white	Yorkshire	European pigs	Female	275 days	16349391	15485858	0.9472	13819	0.433089	Muscle	Muscle	Muscle
SAMEA4881115	PRJEB28465	PAIRED	ILLUMINA	Illumina HiSeq 2500	Sus scrofa	Large white	Yorkshire	European pigs	Male	275 days	12871212	12118465	0.9415	13554	0.424784	Muscle	Muscle	Muscle
SAMEA4881116	PRJEB28465	PAIRED	ILLUMINA	Illumina HiSeq 2500	Sus scrofa	Large white	Yorkshire	European pigs	Female	272 days	13170098	12449540	0.9453	13826	0.433308	Muscle	Muscle	Muscle
SAMEA4881117	PRJEB28465	PAIRED	ILLUMINA	Illumina HiSeq 2500	Sus scrofa	Large white	Yorkshire	European pigs	Female	292 days	9587674	9017771	0.9406	11848	0.371318	Muscle	Muscle	Muscle
SAMEA4881118	PRJEB28465	PAIRED	ILLUMINA	Illumina HiSeq 2500	Sus scrofa	Large white	Yorkshire	European pigs	Male	276 days	14899335	14064475	0.944	12440	0.389871	Muscle	Muscle	Muscle
SAMEA4881119	PRJEB28465	PAIRED	ILLUMINA	Illumina HiSeq 2500	Sus scrofa	Large white	Yorkshire	European pigs	Female	276 days	10872428	10292310	0.9466	12130	0.380155	Muscle	Muscle	Muscle
SAMEA4881120	PRJEB28465	PAIRED	ILLUMINA	Illumina HiSeq 2500	Sus scrofa	Large white	Yorkshire	European pigs	Male	272 days	17197303	16239973	0.9443	13144	0.411934	Muscle	Muscle	Muscle
SAMEA4881121	PRJEB28465	PAIRED	ILLUMINA	Illumina HiSeq 2500	Sus scrofa	Large white	Yorkshire	European pigs	Male	278 days	12119954	11415272	0.9419	12872	0.40341	Muscle	Muscle	Muscle
SAMEA4881122	PRJEB28465	PAIRED	ILLUMINA	Illumina HiSeq 2500	Sus scrofa	Large white	Yorkshire	European pigs	Male	0 day	12941317	12407504	0.9588	11570	0.362605	Muscle	Muscle	Muscle
SAMEA5131473	PRJEB29969	PAIRED	ILLUMINA	Illumina HiSeq 3000	Sus scrofa	(Large White x Landrace) x Meatline	(Yorkshire x Landrace) x Meatline	Cross	Male	120 days	16906281	15877187	0.9391	15607	0.489125	Liver	Liver	Liver
SAMEA5131474	PRJEB29969	PAIRED	ILLUMINA	Illumina HiSeq 3000	Sus scrofa	(Large White x Landrace) x Meatline	(Yorkshire x Landrace) x Meatline	Cross	Male	120 days	13206801	12193935	0.9233	15558	0.487589	Liver	Liver	Liver
SAMEA5131475	PRJEB29969	PAIRED	ILLUMINA	Illumina HiSeq 3000	Sus scrofa	(Large White x Landrace) x Meatline	(Yorkshire x Landrace) x Meatline	Cross	Male	120 days	16513025	15367279	0.9306	15878	0.497618	Liver	Liver	Liver
SAMEA5131476	PRJEB29969	PAIRED	ILLUMINA	Illumina HiSeq 3000	Sus scrofa	(Large White x Landrace) x Meatline	(Yorkshire x Landrace) x Meatline	Cross	Male	120 days	16388909	15362383	0.9374	15585	0.488436	Liver	Liver	Liver
SAMEA5131477	PRJEB29969	PAIRED	ILLUMINA	Illumina HiSeq 3000	Sus scrofa	(Large White x Landrace) x Meatline	(Yorkshire x Landrace) x Meatline	Cross	Male	120 days	15083460	13940679	0.9242	15800	0.495174	Liver	Liver	Liver
SAMEA5131478	PRJEB29969	PAIRED	ILLUMINA	Illumina HiSeq 3000	Sus scrofa	(Large White x Landrace) x Meatline	(Yorkshire x Landrace) x Meatline	Cross	Male	120 days	17926824	16844118	0.9396	16158	0.506393	Liver	Liver	Liver
SAMEA5131479	PRJEB29969	PAIRED	ILLUMINA	Illumina HiSeq 3000	Sus scrofa	(Large White x Landrace) x Meatline	(Yorkshire x Landrace) x Meatline	Cross	Male	120 days	17340999	16193078	0.9338	15480	0.485145	Liver	Liver	Liver
SAMEA5131480	PRJEB29969	PAIRED	ILLUMINA	Illumina HiSeq 3000	Sus scrofa	(Large White x Landrace) x Meatline	(Yorkshire x Landrace) x Meatline	Cross	Male	120 days	15139181	14136438	0.9338	15580	0.488279	Liver	Liver	Liver
SAMEA5131481	PRJEB29969	PAIRED	ILLUMINA	Illumina HiSeq 3000	Sus scrofa	(Large White x Landrace) x Meatline	(Yorkshire x Landrace) x Meatline	Cross	Male	120 days	16323984	15372483	0.9417	15552	0.487401	Liver	Liver	Liver
SAMEA5131482	PRJEB29969	PAIRED	ILLUMINA	Illumina HiSeq 3000	Sus scrofa	(Large White x Landrace) x Meatline	(Yorkshire x Landrace) x Meatline	Cross	Male	120 days	15379510	14406724	0.9367	15545	0.487182	Liver	Liver	Liver
SAMEA5131483	PRJEB29969	PAIRED	ILLUMINA	Illumina HiSeq 3000	Sus scrofa	(Large White x Landrace) x Meatline	(Yorkshire x Landrace) x Meatline	Cross	Male	120 days	15707615	14660797	0.9334	15654	0.490598	Liver	Liver	Liver
SAMEA5131484	PRJEB29969	PAIRED	ILLUMINA	Illumina HiSeq 3000	Sus scrofa	(Large White x Landrace) x Meatline	(Yorkshire x Landrace) x Meatline	Cross	Male	120 days	14379774	13383959	0.9307	15505	0.485928	Liver	Liver	Liver
SAMEA5131485	PRJEB29969	PAIRED	ILLUMINA	Illumina HiSeq 3000	Sus scrofa	(Large White x Landrace) x Meatline	(Yorkshire x Landrace) x Meatline	Cross	Male	120 days	12909822	11737101	0.9092	12416	0.389119	Muscle	Muscle	Muscle
SAMEA5131486	PRJEB29969	PAIRED	ILLUMINA	Illumina HiSeq 3000	Sus scrofa	(Large White x Landrace) x Meatline	(Yorkshire x Landrace) x Meatline	Cross	Male	120 days	15245078	14059857	0.9223	14812	0.46421	Muscle	Muscle	Muscle
SAMEA5131487	PRJEB29969	PAIRED	ILLUMINA	Illumina HiSeq 3000	Sus scrofa	(Large White x Landrace) x Meatline	(Yorkshire x Landrace) x Meatline	Cross	Male	120 days	15181016	14030051	0.9242	14526	0.455246	Muscle	Muscle	Muscle
SAMEA5131488	PRJEB29969	PAIRED	ILLUMINA	Illumina HiSeq 3000	Sus scrofa	(Large White x Landrace) x Meatline	(Yorkshire x Landrace) x Meatline	Cross	Male	120 days	17540685	16494565	0.9404	15095	0.473079	Muscle	Muscle	Muscle
SAMEA5131489	PRJEB29969	PAIRED	ILLUMINA	Illumina HiSeq 3000	Sus scrofa	(Large White x Landrace) x Meatline	(Yorkshire x Landrace) x Meatline	Cross	Male	120 days	14022823	12670388	0.9036	14683	0.460167	Muscle	Muscle	Muscle
SAMEA5131490	PRJEB29969	PAIRED	ILLUMINA	Illumina HiSeq 3000	Sus scrofa	(Large White x Landrace) x Meatline	(Yorkshire x Landrace) x Meatline	Cross	Male	120 days	15219808	13778503	0.9053	14784	0.463332	Muscle	Muscle	Muscle
SAMEA5131491	PRJEB29969	PAIRED	ILLUMINA	Illumina HiSeq 3000	Sus scrofa	(Large White x Landrace) x Meatline	(Yorkshire x Landrace) x Meatline	Cross	Male	120 days	15742490	14723576	0.9353	12980	0.406795	Muscle	Muscle	Muscle
SAMEA5131492	PRJEB29969	PAIRED	ILLUMINA	Illumina HiSeq 3000	Sus scrofa	(Large White x Landrace) x Meatline	(Yorkshire x Landrace) x Meatline	Cross	Male	120 days	17213151	16210437	0.9417	13621	0.426884	Muscle	Muscle	Muscle
SAMEA5131493	PRJEB29969	PAIRED	ILLUMINA	Illumina HiSeq 3000	Sus scrofa	(Large White x Landrace) x Meatline	(Yorkshire x Landrace) x Meatline	Cross	Male	120 days	17654953	16533003	0.9365	12987	0.407014	Muscle	Muscle	Muscle
SAMEA5131494	PRJEB29969	PAIRED	ILLUMINA	Illumina HiSeq 3000	Sus scrofa	(Large White x Landrace) x Meatline	(Yorkshire x Landrace) x Meatline	Cross	Male	120 days	16260853	15081585	0.9275	14521	0.45509	Muscle	Muscle	Muscle
SAMEA5131495	PRJEB29969	PAIRED	ILLUMINA	Illumina HiSeq 3000	Sus scrofa	(Large White x Landrace) x Meatline	(Yorkshire x Landrace) x Meatline	Cross	Male	120 days	15797070	14711048	0.9313	13069	0.409584	Muscle	Muscle	Muscle
SAMEA5131496	PRJEB29969	PAIRED	ILLUMINA	Illumina HiSeq 3000	Sus scrofa	(Large White x Landrace) x Meatline	Yorkshire	European pigs	Male	120 days	13862228	12873856	0.9287	14688	0.460323	Muscle	Muscle	Muscle
SAMEA5131497	PRJEB29969	PAIRED	ILLUMINA	Illumina HiSeq 3000	Sus scrofa	(Large White x Landrace) x Meatline	(Yorkshire x Landrace) x Meatline	Cross	Male	120 days	18172163	16948468	0.9327	15591	0.488624	Liver	Liver	Liver
SAMEA5131498	PRJEB29969	PAIRED	ILLUMINA	Illumina HiSeq 3000	Sus scrofa	(Large White x Landrace) x Meatline	(Yorkshire x Landrace) x Meatline	Cross	Male	120 days	14670052	13722830	0.9354	15649	0.490441	Liver	Liver	Liver
SAMEA5131499	PRJEB29969	PAIRED	ILLUMINA	Illumina HiSeq 3000	Sus scrofa	(Large White x Landrace) x Meatline	(Yorkshire x Landrace) x Meatline	Cross	Male	120 days	14320866	13083652	0.9136	15542	0.487088	Liver	Liver	Liver
SAMEA5131500	PRJEB29969	PAIRED	ILLUMINA	Illumina HiSeq 3000	Sus scrofa	(Large White x Landrace) x Meatline	(Yorkshire x Landrace) x Meatline	Cross	Male	120 days	14174607	13234521	0.9337	15350	0.481071	Liver	Liver	Liver
SAMEA5131501	PRJEB29969	PAIRED	ILLUMINA	Illumina HiSeq 3000	Sus scrofa	(Large White x Landrace) x Meatline	(Yorkshire x Landrace) x Meatline	Cross	Male	120 days	15091846	13885265	0.9201	15589	0.488561	Liver	Liver	Liver
SAMEA5131502	PRJEB29969	PAIRED	ILLUMINA	Illumina HiSeq 3000	Sus scrofa	(Large White x Landrace) x Meatline	(Yorkshire x Landrace) x Meatline	Cross	Male	120 days	15738983	14757721	0.9377	15908	0.498558	Liver	Liver	Liver
SAMEA5131503	PRJEB29969	PAIRED	ILLUMINA	Illumina HiSeq 3000	Sus scrofa	(Large White x Landrace) x Meatline	(Yorkshire x Landrace) x Meatline	Cross	Male	120 days	13321845	12341449	0.9264	16007	0.501661	Liver	Liver	Liver
SAMEA5131504	PRJEB29969	PAIRED	ILLUMINA	Illumina HiSeq 3000	Sus scrofa	(Large White x Landrace) x Meatline	(Yorkshire x Landrace) x Meatline	Cross	Male	120 days	16852943	15519751	0.9209	15830	0.496114	Liver	Liver	Liver
SAMEA5131505	PRJEB29969	PAIRED	ILLUMINA	Illumina HiSeq 3000	Sus scrofa	(Large White x Landrace) x Meatline	(Yorkshire x Landrace) x Meatline	Cross	Male	120 days	14355796	13346238	0.9297	15174	0.475555	Liver	Liver	Liver
SAMEA5131506	PRJEB29969	PAIRED	ILLUMINA	Illumina HiSeq 3000	Sus scrofa	(Large White x Landrace) x Meatline	(Yorkshire x Landrace) x Meatline	Cross	Male	120 days	11421235	10628474	0.9306	17548	0.549956	Liver	Liver	Liver
SAMEA5131507	PRJEB29969	PAIRED	ILLUMINA	Illumina HiSeq 3000	Sus scrofa	(Large White x Landrace) x Meatline	(Yorkshire x Landrace) x Meatline	Cross	Male	120 days	16915894	14858381	0.8784	15970	0.500501	Liver	Liver	Liver
SAMEA5131508	PRJEB29969	PAIRED	ILLUMINA	Illumina HiSeq 3000	Sus scrofa	(Large White x Landrace) x Meatline	(Yorkshire x Landrace) x Meatline	Cross	Male	120 days	14696756	13158854	0.8954	15334	0.480569	Liver	Liver	Liver
SAMEA5131509	PRJEB29969	PAIRED	ILLUMINA	Illumina HiSeq 3000	Sus scrofa	(Large White x Landrace) x Meatline	(Yorkshire x Landrace) x Meatline	Cross	Male	120 days	14659864	13761631	0.9387	13778	0.431804	Muscle	Muscle	Muscle
SAMEA5131510	PRJEB29969	PAIRED	ILLUMINA	Illumina HiSeq 3000	Sus scrofa	(Large White x Landrace) x Meatline	(Yorkshire x Landrace) x Meatline	Cross	Male	120 days	16181687	14999603	0.9269	15101	0.473267	Muscle	Muscle	Muscle
SAMEA5131511	PRJEB29969	PAIRED	ILLUMINA	Illumina HiSeq 3000	Sus scrofa	(Large White x Landrace) x Meatline	(Yorkshire x Landrace) x Meatline	Cross	Male	120 days	17358915	16240661	0.9356	14969	0.46913	Muscle	Muscle	Muscle
SAMEA5131512	PRJEB29969	PAIRED	ILLUMINA	Illumina HiSeq 3000	Sus scrofa	(Large White x Landrace) x Meatline	(Yorkshire x Landrace) x Meatline	Cross	Male	120 days	14280405	12725419	0.8911	13773	0.431647	Muscle	Muscle	Muscle
SAMEA5131513	PRJEB29969	PAIRED	ILLUMINA	Illumina HiSeq 3000	Sus scrofa	(Large White x Landrace) x Meatline	(Yorkshire x Landrace) x Meatline	Cross	Male	120 days	12397617	11384943	0.9183	14174	0.444215	Muscle	Muscle	Muscle
SAMEA5131514	PRJEB29969	PAIRED	ILLUMINA	Illumina HiSeq 3000	Sus scrofa	(Large White x Landrace) x Meatline	(Yorkshire x Landrace) x Meatline	Cross	Male	120 days	16140518	14867098	0.9211	14529	0.45534	Muscle	Muscle	Muscle
SAMEA5131515	PRJEB29969	PAIRED	ILLUMINA	Illumina HiSeq 3000	Sus scrofa	(Large White x Landrace) x Meatline	(Yorkshire x Landrace) x Meatline	Cross	Male	120 days	15067247	13833743	0.9181	12260	0.38423	Muscle	Muscle	Muscle
SAMEA5131516	PRJEB29969	PAIRED	ILLUMINA	Illumina HiSeq 3000	Sus scrofa	(Large White x Landrace) x Meatline	(Yorkshire x Landrace) x Meatline	Cross	Male	120 days	18117857	17061710	0.9417	13246	0.415131	Muscle	Muscle	Muscle
SAMEA5131517	PRJEB29969	PAIRED	ILLUMINA	Illumina HiSeq 3000	Sus scrofa	(Large White x Landrace) x Meatline	(Yorkshire x Landrace) x Meatline	Cross	Male	120 days	14790265	13708961	0.9269	12385	0.388147	Muscle	Muscle	Muscle
SAMEA5131518	PRJEB29969	PAIRED	ILLUMINA	Illumina HiSeq 3000	Sus scrofa	(Large White x Landrace) x Meatline	(Yorkshire x Landrace) x Meatline	Cross	Male	120 days	14755657	13601795	0.9218	14139	0.443118	Muscle	Muscle	Muscle
SAMEA5131519	PRJEB29969	PAIRED	ILLUMINA	Illumina HiSeq 3000	Sus scrofa	(Large White x Landrace) x Meatline	(Yorkshire x Landrace) x Meatline	Cross	Male	120 days	16083553	14998508	0.9325	14392	0.451047	Muscle	Muscle	Muscle
SAMEA5131520	PRJEB29969	PAIRED	ILLUMINA	Illumina HiSeq 3000	Sus scrofa	(Large White x Landrace) x Meatline	(Yorkshire x Landrace) x Meatline	Cross	Male	120 days	15594776	14619342	0.9375	14011	0.439106	Muscle	Muscle	Muscle
SAMEA5137589	PRJEB29985	PAIRED	ILLUMINA	Illumina HiSeq 2000	Sus scrofa domesticus	Unknown	Landrace x Yorkshire	Cross	Female	0 day	33032483	31192243	0.9443	15316	0.480005	Ovary	Ovary	Ovary
SAMEA5137590	PRJEB29985	PAIRED	ILLUMINA	Illumina HiSeq 2000	Sus scrofa domesticus	Unknown	Landrace x Yorkshire	Cross	Female	0 day	23476998	22178349	0.9447	14762	0.462643	Ovary	Ovary	Ovary
SAMEA5137591	PRJEB29985	PAIRED	ILLUMINA	Illumina HiSeq 2000	Sus scrofa domesticus	Unknown	Landrace x Yorkshire	Cross	Female	0 day	29760492	27727053	0.9317	15308	0.479754	Ovary	Ovary	Ovary
SAMEA5137592	PRJEB29985	PAIRED	ILLUMINA	Illumina HiSeq 2000	Sus scrofa domesticus	Unknown	Landrace x Yorkshire	Cross	Female	0 day	22822535	21561672	0.9448	14852	0.465463	Ovary	Ovary	Ovary
SAMEA5137593	PRJEB29985	PAIRED	ILLUMINA	Illumina HiSeq 2000	Sus scrofa domesticus	Unknown	Landrace x Yorkshire	Cross	Female	0 day	24250216	22894764	0.9441	15176	0.475617	Ovary	Ovary	Ovary
SAMEA5137594	PRJEB29985	PAIRED	ILLUMINA	Illumina HiSeq 2000	Sus scrofa domesticus	Unknown	Landrace x Yorkshire	Cross	Female	0 day	32873371	31313111	0.9525	15242	0.477686	Ovary	Ovary	Ovary
SAMEA5137595	PRJEB29985	PAIRED	ILLUMINA	Illumina HiSeq 2000	Sus scrofa domesticus	Unknown	Landrace x Yorkshire	Cross	Female	0 day	31128612	28873456	0.9276	15271	0.478595	Ovary	Ovary	Ovary
SAMEA5137596	PRJEB29985	PAIRED	ILLUMINA	Illumina HiSeq 2000	Sus scrofa domesticus	Unknown	Landrace x Yorkshire	Cross	Female	0 day	27884061	26588909	0.9536	15068	0.472233	Ovary	Ovary	Ovary
SAMEA5137597	PRJEB29985	PAIRED	ILLUMINA	Illumina HiSeq 2000	Sus scrofa domesticus	Unknown	Landrace x Yorkshire	Cross	Female	0 day	33022695	31393613	0.9507	15728	0.492917	Ovary	Ovary	Ovary
SAMEA5137598	PRJEB29985	PAIRED	ILLUMINA	Illumina HiSeq 2000	Sus scrofa domesticus	Unknown	Landrace x Yorkshire	Cross	Female	0 day	35576346	33872988	0.9521	15678	0.49135	Ovary	Ovary	Ovary
SAMEA5137599	PRJEB29985	PAIRED	ILLUMINA	Illumina HiSeq 2000	Sus scrofa domesticus	Unknown	Landrace x Yorkshire	Cross	Female	0 day	28270874	26809458	0.9483	15850	0.496741	Ovary	Ovary	Ovary
SAMEA5137600	PRJEB29985	PAIRED	ILLUMINA	Illumina HiSeq 2000	Sus scrofa domesticus	Unknown	Landrace x Yorkshire	Cross	Female	0 day	30082332	28504647	0.9476	15603	0.489	Ovary	Ovary	Ovary
SAMEA5147753	PRJEB30086	PAIRED	ILLUMINA	Illumina HiSeq 2500	Sus scrofa domesticus	Unknown	Landrace x Yorkshire	Cross	Unknown	Unknown	21417814	20106387	0.9388	18092	0.567005	Bone marrow	Bone marrow	Bone marrow
SAMEA5147754	PRJEB30086	PAIRED	ILLUMINA	Illumina HiSeq 2500	Sus scrofa domesticus	Unknown	Landrace x Yorkshire	Cross	Unknown	Unknown	26963950	25461917	0.9443	17795	0.557697	Bone marrow	Bone marrow	Bone marrow
SAMEA5147755	PRJEB30086	PAIRED	ILLUMINA	Illumina HiSeq 2500	Sus scrofa domesticus	Unknown	Landrace x Yorkshire	Cross	Unknown	Unknown	20454572	18195676	0.8896	16637	0.521405	Bone marrow	Bone marrow	Bone marrow
SAMEA5147756	PRJEB30086	PAIRED	ILLUMINA	Illumina HiSeq 2500	Sus scrofa domesticus	Unknown	Landrace x Yorkshire	Cross	Unknown	Unknown	22469986	21073218	0.9378	17693	0.5545	Bone marrow	Bone marrow	Bone marrow
SAMEA5147757	PRJEB30086	PAIRED	ILLUMINA	Illumina HiSeq 2500	Sus scrofa	Unknown	Landrace x Yorkshire	Cross	Unknown	Unknown	14413704	13846055	0.9606	16813	0.526921	Bone marrow	Bone marrow	Bone marrow
SAMEA5147758	PRJEB30086	PAIRED	ILLUMINA	Illumina HiSeq 2500	Sus scrofa	Unknown	Landrace x Yorkshire	Cross	Unknown	Unknown	22320688	21459095	0.9614	18110	0.567569	Bone marrow	Bone marrow	Bone marrow
SAMEA5147759	PRJEB30086	PAIRED	ILLUMINA	Illumina HiSeq 2500	Sus scrofa	Unknown	Landrace x Yorkshire	Cross	Unknown	Unknown	40554505	37971190	0.9363	19421	0.608656	Bone marrow	Bone marrow	Bone marrow
SAMEA5147760	PRJEB30086	PAIRED	ILLUMINA	Illumina HiSeq 2500	Sus scrofa domesticus	Unknown	Landrace x Yorkshire	Cross	Unknown	Unknown	32639614	30280196	0.9277	16400	0.513978	Bone marrow	Bone marrow	Bone marrow
SAMEA5147761	PRJEB30086	PAIRED	ILLUMINA	Illumina HiSeq 2500	Sus scrofa domesticus	Unknown	Landrace x Yorkshire	Cross	Unknown	Unknown	41376873	39669699	0.9587	17603	0.55168	Bone marrow	Bone marrow	Bone marrow
SAMEA5147762	PRJEB30086	PAIRED	ILLUMINA	Illumina HiSeq 2500	Sus scrofa domesticus	Unknown	Landrace x Yorkshire	Cross	Unknown	Unknown	26758913	25607606	0.957	18163	0.56923	Bone marrow	Bone marrow	Bone marrow
SAMEA5147763	PRJEB30086	PAIRED	ILLUMINA	Illumina HiSeq 2500	Sus scrofa domesticus	Unknown	Landrace x Yorkshire	Cross	Unknown	Unknown	24421389	23271529	0.9529	16119	0.505171	Bone marrow	Bone marrow	Bone marrow
SAMEA5147764	PRJEB30086	PAIRED	ILLUMINA	Illumina HiSeq 2500	Sus scrofa domesticus	Unknown	Landrace x Yorkshire	Cross	Unknown	Unknown	20267140	19572773	0.9657	17760	0.5566	Bone marrow	Bone marrow	Bone marrow
SAMEA5147765	PRJEB30086	PAIRED	ILLUMINA	Illumina HiSeq 2500	Sus scrofa domesticus	Unknown	Landrace x Yorkshire	Cross	Unknown	Unknown	28452230	27494629	0.9663	17944	0.562367	Bone marrow	Bone marrow	Bone marrow
SAMEA5147766	PRJEB30086	PAIRED	ILLUMINA	Illumina HiSeq 2500	Sus scrofa domesticus	Unknown	Landrace x Yorkshire	Cross	Unknown	Unknown	32696280	31465749	0.9624	16568	0.519243	Bone marrow	Bone marrow	Bone marrow
SAMEA5147767	PRJEB30086	PAIRED	ILLUMINA	Illumina HiSeq 2500	Sus scrofa domesticus	Unknown	Landrace x Yorkshire	Cross	Unknown	Unknown	18728248	17814659	0.9512	14641	0.45885	Bone marrow	Bone marrow	Bone marrow
SAMEA5147768	PRJEB30086	PAIRED	ILLUMINA	Illumina HiSeq 2500	Sus scrofa domesticus	Unknown	Landrace x Yorkshire	Cross	Unknown	Unknown	19334110	17946765	0.9282	15431	0.483609	Bone marrow	Bone marrow	Bone marrow
SAMEA5147769	PRJEB30086	PAIRED	ILLUMINA	Illumina HiSeq 2500	Sus scrofa domesticus	Unknown	Landrace x Yorkshire	Cross	Unknown	Unknown	28159674	27122003	0.9632	17538	0.549643	Bone marrow	Bone marrow	Bone marrow
SAMEA5158154	PRJEB30250	PAIRED	ILLUMINA	Illumina HiSeq 2500	Sus scrofa	Landrace	Landrace x Yorkshire	Cross	Female	7 days	28759426	27113098	0.9428	14975	0.469318	Liver	Liver	Liver
SAMEA5158155	PRJEB30250	PAIRED	ILLUMINA	Illumina HiSeq 2500	Sus scrofa	Landrace	Landrace x Yorkshire	Cross	Male	7 days	19893398	19044562	0.9573	15279	0.478845	Liver	Liver	Liver
SAMEA5158156	PRJEB30250	PAIRED	ILLUMINA	Illumina HiSeq 2500	Sus scrofa	Landrace	Landrace x Yorkshire	Cross	Male	7 days	22533255	21512722	0.9547	14914	0.467406	Liver	Liver	Liver
SAMEA5158157	PRJEB30250	PAIRED	ILLUMINA	Illumina HiSeq 2500	Sus scrofa	Landrace	Landrace x Yorkshire	Cross	Male	7 days	17443655	16635285	0.9537	14739	0.461922	Liver	Liver	Liver
SAMEA5158158	PRJEB30250	PAIRED	ILLUMINA	Illumina HiSeq 2500	Sus scrofa	Landrace	Landrace x Yorkshire	Cross	Male	7 days	24191473	23090285	0.9545	15113	0.473643	Liver	Liver	Liver
SAMEA5158159	PRJEB30250	PAIRED	ILLUMINA	Illumina HiSeq 2500	Sus scrofa	Landrace	Landrace x Yorkshire	Cross	Female	7 days	20323643	19428117	0.9559	14672	0.459822	Liver	Liver	Liver
SAMEA5158160	PRJEB30250	PAIRED	ILLUMINA	Illumina HiSeq 2500	Sus scrofa	Landrace	Landrace x Yorkshire	Cross	Female	7 days	20703772	19743255	0.9536	14891	0.466685	Liver	Liver	Liver
SAMEA5158161	PRJEB30250	PAIRED	ILLUMINA	Illumina HiSeq 2500	Sus scrofa	Landrace	Landrace x Yorkshire	Cross	Female	7 days	22863680	21828734	0.9547	14632	0.458568	Liver	Liver	Liver
SAMEA5158162	PRJEB30250	PAIRED	ILLUMINA	Illumina HiSeq 2500	Sus scrofa	Landrace	Landrace x Yorkshire	Cross	Female	7 days	17998552	16975236	0.9431	13164	0.412561	Liver	Liver	Liver
SAMEA5158163	PRJEB30250	PAIRED	ILLUMINA	Illumina HiSeq 2500	Sus scrofa	Landrace	Landrace x Yorkshire	Cross	Female	7 days	19813569	18757652	0.9467	14697	0.460605	Liver	Liver	Liver
SAMEA5158164	PRJEB30250	PAIRED	ILLUMINA	Illumina HiSeq 2500	Sus scrofa	Landrace	Landrace x Yorkshire	Cross	Male	7 days	30421475	28848891	0.9483	14745	0.46211	Liver	Liver	Liver
SAMEA5158165	PRJEB30250	PAIRED	ILLUMINA	Illumina HiSeq 2500	Sus scrofa	Landrace	Landrace x Yorkshire	Cross	Male	7 days	26270078	24767950	0.9428	13516	0.423593	Liver	Liver	Liver
SAMEA5158166	PRJEB30250	PAIRED	ILLUMINA	Illumina HiSeq 2500	Sus scrofa	Landrace	Landrace x Yorkshire	Cross	Male	7 days	25165881	23849469	0.9477	15073	0.472389	Liver	Liver	Liver
SAMEA5158167	PRJEB30250	PAIRED	ILLUMINA	Illumina HiSeq 2500	Sus scrofa	Landrace	Landrace x Yorkshire	Cross	Female	7 days	24335553	22927437	0.9421	14692	0.460449	Liver	Liver	Liver
SAMEA5158169	PRJEB30250	PAIRED	ILLUMINA	Illumina HiSeq 2500	Sus scrofa	Landrace	Landrace x Yorkshire	Cross	Female	7 days	22326439	21091410	0.9447	13928	0.436505	Liver	Liver	Liver
SAMEA5158170	PRJEB30250	PAIRED	ILLUMINA	Illumina HiSeq 2500	Sus scrofa	Landrace	Landrace x Yorkshire	Cross	Male	7 days	22725164	21618470	0.9513	14787	0.463426	Liver	Liver	Liver
SAMEA5158171	PRJEB30250	PAIRED	ILLUMINA	Illumina HiSeq 2500	Sus scrofa	Landrace	Landrace x Yorkshire	Cross	Male	7 days	27406215	26127656	0.9533	14751	0.462298	Liver	Liver	Liver
SAMEA5158172	PRJEB30250	PAIRED	ILLUMINA	Illumina HiSeq 2500	Sus scrofa	Landrace	Landrace x Yorkshire	Cross	Female	7 days	23276932	22107195	0.9497	14547	0.455904	Liver	Liver	Liver
SAMEA5158173	PRJEB30250	PAIRED	ILLUMINA	Illumina HiSeq 2500	Sus scrofa	Landrace	Landrace x Yorkshire	Cross	Male	7 days	36545624	34673433	0.9488	15174	0.475555	Liver	Liver	Liver
SAMEA5158174	PRJEB30250	PAIRED	ILLUMINA	Illumina HiSeq 2500	Sus scrofa	Landrace	Landrace x Yorkshire	Cross	Female	7 days	19883742	18858389	0.9484	15000	0.470102	Liver	Liver	Liver
SAMEA5158175	PRJEB30250	PAIRED	ILLUMINA	Illumina HiSeq 2500	Sus scrofa	Landrace	Landrace x Yorkshire	Cross	Male	7 days	35732843	34005046	0.9516	15170	0.475429	Liver	Liver	Liver
SAMEA5158176	PRJEB30250	PAIRED	ILLUMINA	Illumina HiSeq 2500	Sus scrofa	Landrace	Landrace x Yorkshire	Cross	Female	7 days	20003015	19038344	0.9518	14762	0.462643	Liver	Liver	Liver
SAMEA5158177	PRJEB30250	PAIRED	ILLUMINA	Illumina HiSeq 2500	Sus scrofa	Landrace	Landrace x Yorkshire	Cross	Male	7 days	16901842	16164767	0.9564	14836	0.464962	Liver	Liver	Liver
SAMEA5158178	PRJEB30250	PAIRED	ILLUMINA	Illumina HiSeq 2500	Sus scrofa	Landrace	Landrace x Yorkshire	Cross	Female	7 days	38252548	36588608	0.9565	14960	0.468848	Liver	Liver	Liver
SAMEA5158179	PRJEB30250	PAIRED	ILLUMINA	Illumina HiSeq 2500	Sus scrofa	Landrace	Landrace x Yorkshire	Cross	Female	7 days	19288989	18399033	0.9539	14682	0.460135	Liver	Liver	Liver
SAMEA5158180	PRJEB30250	PAIRED	ILLUMINA	Illumina HiSeq 2500	Sus scrofa	Landrace	Landrace x Yorkshire	Cross	Female	7 days	31375597	29890365	0.9527	14556	0.456187	Liver	Liver	Liver
SAMEA5158181	PRJEB30250	PAIRED	ILLUMINA	Illumina HiSeq 2500	Sus scrofa	Landrace	Landrace x Yorkshire	Cross	Female	7 days	39313535	37398158	0.9513	14767	0.462799	Liver	Liver	Liver
SAMEA5158182	PRJEB30250	PAIRED	ILLUMINA	Illumina HiSeq 2500	Sus scrofa	Landrace	Landrace x Yorkshire	Cross	Male	7 days	13731294	13067499	0.9517	14547	0.455904	Liver	Liver	Liver
SAMEA5158183	PRJEB30250	PAIRED	ILLUMINA	Illumina HiSeq 2500	Sus scrofa	Landrace	Landrace x Yorkshire	Cross	Male	7 days	44997188	42974926	0.9551	15313	0.479911	Liver	Liver	Liver
SAMEA5158184	PRJEB30250	PAIRED	ILLUMINA	Illumina HiSeq 2500	Sus scrofa	Landrace	Landrace x Yorkshire	Cross	Male	7 days	39203774	37308994	0.9517	14827	0.46468	Liver	Liver	Liver
SAMEA5158185	PRJEB30250	PAIRED	ILLUMINA	Illumina HiSeq 2500	Sus scrofa	Landrace	Landrace x Yorkshire	Cross	Male	7 days	17324741	16484867	0.9515	15028	0.470979	Liver	Liver	Liver
SAMEA5158186	PRJEB30250	PAIRED	ILLUMINA	Illumina HiSeq 2500	Sus scrofa	Landrace	Landrace x Yorkshire	Cross	Female	7 days	16277121	15521815	0.9536	14517	0.454964	Liver	Liver	Liver
SAMEA5158187	PRJEB30250	PAIRED	ILLUMINA	Illumina HiSeq 2500	Sus scrofa	Landrace	Landrace x Yorkshire	Cross	Male	7 days	25966423	24613794	0.9479	13533	0.424126	Liver	Liver	Liver
SAMEA5158188	PRJEB30250	PAIRED	ILLUMINA	Illumina HiSeq 2500	Sus scrofa	Landrace	Landrace x Yorkshire	Cross	Female	7 days	17485511	16569729	0.9476	14339	0.449386	Liver	Liver	Liver
SAMEA5158189	PRJEB30250	PAIRED	ILLUMINA	Illumina HiSeq 2500	Sus scrofa	Landrace	Landrace x Yorkshire	Cross	Male	7 days	32533930	30818272	0.9473	13388	0.419581	Liver	Liver	Liver
SAMEA5158190	PRJEB30250	PAIRED	ILLUMINA	Illumina HiSeq 2500	Sus scrofa	Landrace	Landrace x Yorkshire	Cross	Female	7 days	20940605	19524569	0.9324	14769	0.462862	Liver	Liver	Liver
SAMEA5158191	PRJEB30250	PAIRED	ILLUMINA	Illumina HiSeq 2500	Sus scrofa	Landrace	Landrace x Yorkshire	Cross	Female	7 days	22816871	21020680	0.9213	14856	0.465589	Liver	Liver	Liver
SAMEA5158192	PRJEB30250	PAIRED	ILLUMINA	Illumina HiSeq 2500	Sus scrofa	Landrace	Landrace x Yorkshire	Cross	Male	7 days	23004002	21703269	0.9435	14746	0.462141	Liver	Liver	Liver
SAMEA5158193	PRJEB30250	PAIRED	ILLUMINA	Illumina HiSeq 2500	Sus scrofa	Landrace	Landrace x Yorkshire	Cross	Female	7 days	17725676	16861223	0.9512	14883	0.466435	Liver	Liver	Liver
SAMEA5158194	PRJEB30250	PAIRED	ILLUMINA	Illumina HiSeq 2500	Sus scrofa	Landrace	Landrace x Yorkshire	Cross	Female	7 days	24094787	22925581	0.9515	15099	0.473204	Liver	Liver	Liver
SAMEA5158195	PRJEB30250	PAIRED	ILLUMINA	Illumina HiSeq 2500	Sus scrofa	Landrace	Landrace x Yorkshire	Cross	Male	7 days	29172291	27657119	0.9481	13573	0.425379	Liver	Liver	Liver
SAMEA5158196	PRJEB30250	PAIRED	ILLUMINA	Illumina HiSeq 2500	Sus scrofa	Landrace	Landrace x Yorkshire	Cross	Female	7 days	21702708	20573354	0.948	14491	0.454149	Liver	Liver	Liver
SAMEA5158197	PRJEB30250	PAIRED	ILLUMINA	Illumina HiSeq 2500	Sus scrofa	Landrace	Landrace x Yorkshire	Cross	Male	7 days	18349817	17478488	0.9525	15119	0.473831	Liver	Liver	Liver
SAMEA5158198	PRJEB30250	PAIRED	ILLUMINA	Illumina HiSeq 2500	Sus scrofa	Landrace	Landrace x Yorkshire	Cross	Male	7 days	21068718	19958584	0.9473	15219	0.476965	Liver	Liver	Liver
SAMEA5158199	PRJEB30250	PAIRED	ILLUMINA	Illumina HiSeq 2500	Sus scrofa	Landrace	Landrace x Yorkshire	Cross	Female	7 days	29586504	28267053	0.9554	15230	0.47731	Liver	Liver	Liver
SAMEA5158200	PRJEB30250	PAIRED	ILLUMINA	Illumina HiSeq 2500	Sus scrofa	Landrace	Landrace x Yorkshire	Cross	Male	7 days	18737563	17786137	0.9492	14614	0.458004	Liver	Liver	Liver
SAMEA5158201	PRJEB30250	PAIRED	ILLUMINA	Illumina HiSeq 2500	Sus scrofa	Landrace	Landrace x Yorkshire	Cross	Female	7 days	30675303	29193173	0.9517	14646	0.459007	Liver	Liver	Liver
SAMEA5158202	PRJEB30250	PAIRED	ILLUMINA	Illumina HiSeq 2500	Sus scrofa	Landrace	Landrace x Yorkshire	Cross	Male	7 days	20493897	19434188	0.9483	14854	0.465526	Liver	Liver	Liver
SAMEA5185646	PRJEB30361	SINGLE	ILLUMINA	Illumina HiSeq 3000	Sus scrofa	Unknown	Landrace x Yorkshire	Cross	Female	Unknown	28056964	18869888	0.6726	13400	0.419957	Blood	Blood	Blood
SAMEA5185647	PRJEB30361	SINGLE	ILLUMINA	Illumina HiSeq 3000	Sus scrofa	Unknown	Unknown	Unknown	Female	Unknown	30853377	17669703	0.5727	12132	0.380218	Unknown	Unknown	Unknown
SAMEA5185648	PRJEB30361	SINGLE	ILLUMINA	Illumina HiSeq 3000	Sus scrofa	Unknown	Unknown	Unknown	Male	Unknown	29470761	14887701	0.5052	11519	0.361007	Unknown	Unknown	Unknown
SAMEA5185649	PRJEB30361	SINGLE	ILLUMINA	Illumina HiSeq 3000	Sus scrofa	Unknown	Landrace x Yorkshire	Cross	Female	Unknown	28194186	19354777	0.6865	13258	0.415507	Blood	Blood	Blood
SAMEA5185650	PRJEB30361	SINGLE	ILLUMINA	Illumina HiSeq 3000	Sus scrofa	Unknown	Landrace x Yorkshire	Cross	Female	Unknown	32697108	20865109	0.6381	13655	0.427949	Blood	Blood	Blood
SAMEA5185651	PRJEB30361	SINGLE	ILLUMINA	Illumina HiSeq 3000	Sus scrofa	Unknown	Unknown	Unknown	Male	Unknown	39390582	21958356	0.5575	12150	0.380782	Unknown	Unknown	Unknown
SAMEA5185652	PRJEB30361	SINGLE	ILLUMINA	Illumina HiSeq 3000	Sus scrofa	Unknown	Landrace x Yorkshire	Cross	Male	Unknown	35996185	24278581	0.6745	13504	0.423217	Blood	Blood	Blood
SAMEA5185653	PRJEB30361	SINGLE	ILLUMINA	Illumina HiSeq 3000	Sus scrofa	Unknown	Landrace x Yorkshire	Cross	Female	Unknown	32912463	24381216	0.7408	13967	0.437727	Blood	Blood	Blood
SAMEA5185654	PRJEB30361	SINGLE	ILLUMINA	Illumina HiSeq 3000	Sus scrofa	Unknown	Unknown	Unknown	Male	Unknown	39292930	18657256	0.4748	9852	0.308763	Unknown	Unknown	Unknown
SAMEA5185655	PRJEB30361	SINGLE	ILLUMINA	Illumina HiSeq 3000	Sus scrofa	Unknown	Unknown	Unknown	Female	Unknown	31651546	15422863	0.4873	9825	0.307917	Unknown	Unknown	Unknown
SAMEA5185656	PRJEB30361	SINGLE	ILLUMINA	Illumina HiSeq 3000	Sus scrofa	Unknown	Unknown	Unknown	Female	Unknown	30430029	14719587	0.4837	10714	0.335778	Unknown	Unknown	Unknown
SAMEA5185657	PRJEB30361	SINGLE	ILLUMINA	Illumina HiSeq 3000	Sus scrofa	Unknown	Unknown	Unknown	Female	Unknown	25429704	12760791	0.5018	11219	0.351605	Unknown	Unknown	Unknown
SAMEA5185658	PRJEB30361	SINGLE	ILLUMINA	Illumina HiSeq 3000	Sus scrofa	Unknown	Unknown	Unknown	Female	Unknown	34469276	13240647	0.3841	8271	0.259214	Unknown	Unknown	Unknown
SAMEA5185659	PRJEB30361	SINGLE	ILLUMINA	Illumina HiSeq 3000	Sus scrofa	Unknown	Unknown	Unknown	Female	Unknown	29814437	13135147	0.4406	10469	0.3281	Unknown	Unknown	Unknown
SAMEA5185660	PRJEB30361	SINGLE	ILLUMINA	Illumina HiSeq 3000	Sus scrofa	Unknown	Landrace x Yorkshire	Cross	Female	Unknown	32083034	20352350	0.6344	13342	0.41814	Blood	Blood	Blood
SAMEA5185661	PRJEB30361	SINGLE	ILLUMINA	Illumina HiSeq 3000	Sus scrofa	Unknown	Landrace x Yorkshire	Cross	Male	Unknown	34464819	22965440	0.6663	13682	0.428795	Blood	Blood	Blood
SAMEA5185662	PRJEB30361	SINGLE	ILLUMINA	Illumina HiSeq 3000	Sus scrofa	Unknown	Landrace x Yorkshire	Cross	Male	Unknown	23325357	15360465	0.6585	12769	0.400182	Blood	Blood	Blood
SAMEA5185663	PRJEB30361	SINGLE	ILLUMINA	Illumina HiSeq 3000	Sus scrofa	Unknown	Unknown	Unknown	Female	Unknown	27808309	14497226	0.5213	11339	0.355365	Unknown	Unknown	Unknown
SAMEA5185664	PRJEB30361	SINGLE	ILLUMINA	Illumina HiSeq 3000	Sus scrofa	Unknown	Unknown	Unknown	Female	Unknown	37996175	20043496	0.5275	11767	0.368779	Unknown	Unknown	Unknown
SAMEA5185665	PRJEB30361	SINGLE	ILLUMINA	Illumina HiSeq 3000	Sus scrofa	Unknown	Unknown	Unknown	Female	Unknown	30275380	14272057	0.4714	11299	0.354112	Unknown	Unknown	Unknown
SAMEA5185666	PRJEB30361	SINGLE	ILLUMINA	Illumina HiSeq 3000	Sus scrofa	Unknown	Unknown	Unknown	Female	Unknown	29227993	17346233	0.5935	12837	0.402313	Unknown	Unknown	Unknown
SAMEA5185667	PRJEB30361	SINGLE	ILLUMINA	Illumina HiSeq 3000	Sus scrofa	Unknown	Unknown	Unknown	Female	Unknown	27472531	15933342	0.58	11692	0.366428	Unknown	Unknown	Unknown
SAMEA5185668	PRJEB30361	SINGLE	ILLUMINA	Illumina HiSeq 3000	Sus scrofa	Unknown	Unknown	Unknown	Female	Unknown	29048615	15853612	0.5458	11905	0.373104	Unknown	Unknown	Unknown
SAMEA5185669	PRJEB30361	SINGLE	ILLUMINA	Illumina HiSeq 3000	Sus scrofa	Unknown	Unknown	Unknown	Female	Unknown	26301888	13826354	0.5257	11843	0.371161	Unknown	Unknown	Unknown
SAMEA5185670	PRJEB30361	SINGLE	ILLUMINA	Illumina HiSeq 3000	Sus scrofa	Unknown	Unknown	Unknown	Male	Unknown	28168656	15013091	0.533	11712	0.367055	Unknown	Unknown	Unknown
SAMEA5185671	PRJEB30361	SINGLE	ILLUMINA	Illumina HiSeq 3000	Sus scrofa	Unknown	Unknown	Unknown	Male	Unknown	29671816	15276713	0.5149	12239	0.383572	Unknown	Unknown	Unknown
SAMEA5185672	PRJEB30361	SINGLE	ILLUMINA	Illumina HiSeq 3000	Sus scrofa	Unknown	Unknown	Unknown	Female	Unknown	29640549	14655819	0.4945	11396	0.357152	Unknown	Unknown	Unknown
SAMEA5185673	PRJEB30361	SINGLE	ILLUMINA	Illumina HiSeq 3000	Sus scrofa	Unknown	Landrace x Yorkshire	Cross	Male	Unknown	28779296	18853779	0.6551	12501	0.391783	Blood	Blood	Blood
SAMEA5185674	PRJEB30361	SINGLE	ILLUMINA	Illumina HiSeq 3000	Sus scrofa	Unknown	Landrace x Yorkshire	Cross	Female	Unknown	39498784	23865100	0.6042	13766	0.431428	Blood	Blood	Blood
SAMEA5185675	PRJEB30361	SINGLE	ILLUMINA	Illumina HiSeq 3000	Sus scrofa	Unknown	Unknown	Unknown	Male	Unknown	36429580	15376989	0.4221	10053	0.315062	Unknown	Unknown	Unknown
SAMEA5185676	PRJEB30361	SINGLE	ILLUMINA	Illumina HiSeq 3000	Sus scrofa	Unknown	Unknown	Unknown	Female	Unknown	32679416	13291438	0.4067	10079	0.315877	Unknown	Unknown	Unknown
SAMEA5185677	PRJEB30361	SINGLE	ILLUMINA	Illumina HiSeq 3000	Sus scrofa	Unknown	Unknown	Unknown	Female	Unknown	28096104	16258129	0.5787	12019	0.376677	Unknown	Unknown	Unknown
SAMEA5185678	PRJEB30361	SINGLE	ILLUMINA	Illumina HiSeq 3000	Sus scrofa	Unknown	Unknown	Unknown	Female	Unknown	34703717	15311795	0.4412	10999	0.34471	Unknown	Unknown	Unknown
SAMEA5185679	PRJEB30361	SINGLE	ILLUMINA	Illumina HiSeq 3000	Sus scrofa	Unknown	Unknown	Unknown	Female	Unknown	30154635	17727249	0.5879	12220	0.382976	Unknown	Unknown	Unknown
SAMEA5185680	PRJEB30361	SINGLE	ILLUMINA	Illumina HiSeq 3000	Sus scrofa	Unknown	Unknown	Unknown	Male	Unknown	29302111	16223385	0.5537	12522	0.392441	Unknown	Unknown	Unknown
SAMEA5185681	PRJEB30361	SINGLE	ILLUMINA	Illumina HiSeq 3000	Sus scrofa	Unknown	Unknown	Unknown	Male	Unknown	30901081	15078539	0.488	11385	0.356807	Unknown	Unknown	Unknown
SAMEA5185682	PRJEB30361	SINGLE	ILLUMINA	Illumina HiSeq 3000	Sus scrofa	Unknown	Unknown	Unknown	Female	Unknown	33461782	15680870	0.4686	11118	0.348439	Unknown	Unknown	Unknown
SAMEA5185683	PRJEB30361	SINGLE	ILLUMINA	Illumina HiSeq 3000	Sus scrofa	Unknown	Unknown	Unknown	Female	Unknown	27498959	12923551	0.47	11032	0.345744	Unknown	Unknown	Unknown
SAMEA5185684	PRJEB30361	SINGLE	ILLUMINA	Illumina HiSeq 3000	Sus scrofa	Unknown	Unknown	Unknown	Female	Unknown	39405382	16686747	0.4235	9349	0.292999	Unknown	Unknown	Unknown
SAMEA5185685	PRJEB30361	SINGLE	ILLUMINA	Illumina HiSeq 3000	Sus scrofa	Unknown	Unknown	Unknown	Female	Unknown	36073043	15176213	0.4207	9187	0.287922	Unknown	Unknown	Unknown
SAMEA5185686	PRJEB30361	SINGLE	ILLUMINA	Illumina HiSeq 3000	Sus scrofa	Unknown	Landrace x Yorkshire	Cross	Female	Unknown	39478266	24354760	0.6169	13389	0.419613	Blood	Blood	Blood
SAMEA5185687	PRJEB30361	SINGLE	ILLUMINA	Illumina HiSeq 3000	Sus scrofa	Unknown	Unknown	Unknown	Female	Unknown	39189772	21648089	0.5524	11768	0.36881	Unknown	Unknown	Unknown
SAMEA5185688	PRJEB30361	SINGLE	ILLUMINA	Illumina HiSeq 3000	Sus scrofa	Unknown	Unknown	Unknown	Male	Unknown	32220552	16453153	0.5106	11224	0.351761	Unknown	Unknown	Unknown
SAMEA5185689	PRJEB30361	SINGLE	ILLUMINA	Illumina HiSeq 3000	Sus scrofa	Unknown	Unknown	Unknown	Female	Unknown	26879810	12540542	0.4665	11060	0.346622	Unknown	Unknown	Unknown
SAMEA5185690	PRJEB30361	SINGLE	ILLUMINA	Illumina HiSeq 3000	Sus scrofa	Unknown	Unknown	Unknown	Male	Unknown	25292585	8517952	0.3368	9757	0.305785	Unknown	Unknown	Unknown
SAMEA5185691	PRJEB30361	SINGLE	ILLUMINA	Illumina HiSeq 3000	Sus scrofa	Unknown	Unknown	Unknown	Male	Unknown	30387875	16006457	0.5267	11457	0.359064	Unknown	Unknown	Unknown
SAMEA5185692	PRJEB30361	SINGLE	ILLUMINA	Illumina HiSeq 3000	Sus scrofa	Unknown	Unknown	Unknown	Male	Unknown	28119521	11881146	0.4225	9466	0.296665	Unknown	Unknown	Unknown
SAMEA5185693	PRJEB30361	SINGLE	ILLUMINA	Illumina HiSeq 3000	Sus scrofa	Unknown	Unknown	Unknown	Male	Unknown	26396599	13104316	0.4964	10547	0.330544	Unknown	Unknown	Unknown
SAMEA5185694	PRJEB30361	SINGLE	ILLUMINA	Illumina HiSeq 3000	Sus scrofa	Unknown	Unknown	Unknown	Male	Unknown	30775052	18236003	0.5926	12574	0.39407	Unknown	Unknown	Unknown
SAMEA5185695	PRJEB30361	SINGLE	ILLUMINA	Illumina HiSeq 3000	Sus scrofa	Unknown	Unknown	Unknown	Female	Unknown	43185855	18881387	0.4372	10628	0.333083	Unknown	Unknown	Unknown
SAMEA5185696	PRJEB30361	SINGLE	ILLUMINA	Illumina HiSeq 3000	Sus scrofa	Unknown	Unknown	Unknown	Male	Unknown	29062627	10238906	0.3523	6416	0.201078	Unknown	Unknown	Unknown
SAMEA5185697	PRJEB30361	SINGLE	ILLUMINA	Illumina HiSeq 3000	Sus scrofa	Unknown	Unknown	Unknown	Female	Unknown	30550810	15288271	0.5004	11378	0.356588	Unknown	Unknown	Unknown
SAMEA5185698	PRJEB30361	SINGLE	ILLUMINA	Illumina HiSeq 3000	Sus scrofa	Unknown	Unknown	Unknown	Female	Unknown	28690669	11769872	0.4102	9454	0.296289	Unknown	Unknown	Unknown
SAMEA5185699	PRJEB30361	SINGLE	ILLUMINA	Illumina HiSeq 3000	Sus scrofa	Unknown	Unknown	Unknown	Female	Unknown	31230252	14150359	0.4531	10754	0.337031	Unknown	Unknown	Unknown
SAMEA5185700	PRJEB30361	SINGLE	ILLUMINA	Illumina HiSeq 3000	Sus scrofa	Unknown	Unknown	Unknown	Male	Unknown	33797036	14497911	0.429	9742	0.305315	Unknown	Unknown	Unknown
SAMEA5185701	PRJEB30361	SINGLE	ILLUMINA	Illumina HiSeq 3000	Sus scrofa	Unknown	Unknown	Unknown	Male	Unknown	33926755	17279423	0.5093	11292	0.353892	Unknown	Unknown	Unknown
SAMEA5185702	PRJEB30361	SINGLE	ILLUMINA	Illumina HiSeq 3000	Sus scrofa	Unknown	Unknown	Unknown	Female	Unknown	31632140	14984192	0.4737	10476	0.328319	Unknown	Unknown	Unknown
SAMEA5185703	PRJEB30361	SINGLE	ILLUMINA	Illumina HiSeq 3000	Sus scrofa	Unknown	Unknown	Unknown	Male	Unknown	25829990	12842277	0.4972	10852	0.340103	Unknown	Unknown	Unknown
SAMEA5185704	PRJEB30361	SINGLE	ILLUMINA	Illumina HiSeq 3000	Sus scrofa	Unknown	Unknown	Unknown	Female	Unknown	32382456	13668355	0.4221	9513	0.298138	Unknown	Unknown	Unknown
SAMEA5185705	PRJEB30361	SINGLE	ILLUMINA	Illumina HiSeq 3000	Sus scrofa	Unknown	Unknown	Unknown	Female	Unknown	31549290	13823575	0.4382	9982	0.312837	Unknown	Unknown	Unknown
SAMEA5185706	PRJEB30361	SINGLE	ILLUMINA	Illumina HiSeq 3000	Sus scrofa	Unknown	Unknown	Unknown	Female	Unknown	42963469	17033662	0.3965	10698	0.335276	Unknown	Unknown	Unknown
SAMEA5185707	PRJEB30361	SINGLE	ILLUMINA	Illumina HiSeq 3000	Sus scrofa	Unknown	Unknown	Unknown	Female	Unknown	28698298	13661274	0.476	10552	0.330701	Unknown	Unknown	Unknown
SAMEA5185708	PRJEB30361	SINGLE	ILLUMINA	Illumina HiSeq 3000	Sus scrofa	Unknown	Landrace x Yorkshire	Cross	Female	Unknown	21372757	15975011	0.7474	12164	0.381221	Blood	Blood	Blood
SAMEA5185709	PRJEB30361	SINGLE	ILLUMINA	Illumina HiSeq 3000	Sus scrofa	Unknown	Unknown	Unknown	Female	Unknown	23659509	13516590	0.5713	11906	0.373135	Unknown	Unknown	Unknown
SAMEA5185710	PRJEB30361	SINGLE	ILLUMINA	Illumina HiSeq 3000	Sus scrofa	Unknown	Landrace x Yorkshire	Cross	Female	Unknown	25222463	16023666	0.6353	13029	0.40833	Blood	Blood	Blood
SAMEA5185711	PRJEB30361	SINGLE	ILLUMINA	Illumina HiSeq 3000	Sus scrofa	Unknown	Unknown	Unknown	Female	Unknown	25439537	15187676	0.597	11902	0.37301	Unknown	Unknown	Unknown
SAMEA5185712	PRJEB30361	SINGLE	ILLUMINA	Illumina HiSeq 3000	Sus scrofa	Unknown	Landrace x Yorkshire	Cross	Female	Unknown	36647462	24063208	0.6566	13585	0.425755	Blood	Blood	Blood
SAMEA5185713	PRJEB30361	SINGLE	ILLUMINA	Illumina HiSeq 3000	Sus scrofa	Unknown	Unknown	Unknown	Female	Unknown	31698521	13808782	0.4356	10479	0.328413	Unknown	Unknown	Unknown
SAMEA5185714	PRJEB30361	SINGLE	ILLUMINA	Illumina HiSeq 3000	Sus scrofa	Unknown	Unknown	Unknown	Female	Unknown	36021515	14756847	0.4097	10058	0.315219	Unknown	Unknown	Unknown
SAMEA5185715	PRJEB30361	SINGLE	ILLUMINA	Illumina HiSeq 3000	Sus scrofa	Unknown	Landrace x Yorkshire	Cross	Female	Unknown	34918192	24199354	0.693	13745	0.43077	Blood	Blood	Blood
SAMEA5185716	PRJEB30361	SINGLE	ILLUMINA	Illumina HiSeq 3000	Sus scrofa	Unknown	Landrace x Yorkshire	Cross	Female	Unknown	37010804	22311254	0.6028	13193	0.41347	Blood	Blood	Blood
SAMEA5185717	PRJEB30361	SINGLE	ILLUMINA	Illumina HiSeq 3000	Sus scrofa	Unknown	Unknown	Unknown	Female	Unknown	33497559	17913288	0.5348	11572	0.362668	Unknown	Unknown	Unknown
SAMEA5185718	PRJEB30361	SINGLE	ILLUMINA	Illumina HiSeq 3000	Sus scrofa	Unknown	Landrace x Yorkshire	Cross	Female	Unknown	32177461	23975122	0.7451	13938	0.436818	Blood	Blood	Blood
SAMEA5185719	PRJEB30361	SINGLE	ILLUMINA	Illumina HiSeq 3000	Sus scrofa	Unknown	Landrace x Yorkshire	Cross	Female	Unknown	33173001	23492782	0.7082	13865	0.434531	Blood	Blood	Blood
SAMEA5185720	PRJEB30361	SINGLE	ILLUMINA	Illumina HiSeq 3000	Sus scrofa	Unknown	Unknown	Unknown	Female	Unknown	29446728	14436620	0.4903	10865	0.34051	Unknown	Unknown	Unknown
SAMEA5185721	PRJEB30361	SINGLE	ILLUMINA	Illumina HiSeq 3000	Sus scrofa	Unknown	Unknown	Unknown	Female	Unknown	34004754	17149865	0.5043	11270	0.353203	Unknown	Unknown	Unknown
SAMEA5185722	PRJEB30361	SINGLE	ILLUMINA	Illumina HiSeq 3000	Sus scrofa	Unknown	Landrace x Yorkshire	Cross	Male	Unknown	30778081	20204132	0.6564	13626	0.42704	Blood	Blood	Blood
SAMEA5185723	PRJEB30361	SINGLE	ILLUMINA	Illumina HiSeq 3000	Sus scrofa	Unknown	Landrace x Yorkshire	Cross	Female	Unknown	27760011	17425613	0.6277	13515	0.423561	Blood	Blood	Blood
SAMEA5185724	PRJEB30361	SINGLE	ILLUMINA	Illumina HiSeq 3000	Sus scrofa	Unknown	Unknown	Unknown	Female	Unknown	36601106	20001337	0.5465	11709	0.366961	Unknown	Unknown	Unknown
SAMEA5185725	PRJEB30361	SINGLE	ILLUMINA	Illumina HiSeq 3000	Sus scrofa	Unknown	Unknown	Unknown	Female	Unknown	26377759	14100962	0.5346	11759	0.368528	Unknown	Unknown	Unknown
SAMEA5185726	PRJEB30361	SINGLE	ILLUMINA	Illumina HiSeq 3000	Sus scrofa	Unknown	Unknown	Unknown	Female	Unknown	4072529	2193438	0.5386	10150	0.318102	Unknown	Unknown	Unknown
SAMEA5185727	PRJEB30361	SINGLE	ILLUMINA	Illumina HiSeq 3000	Sus scrofa	Unknown	Unknown	Unknown	Female	Unknown	34173509	19261931	0.5637	10885	0.341137	Unknown	Unknown	Unknown
SAMEA5185728	PRJEB30361	SINGLE	ILLUMINA	Illumina HiSeq 3000	Sus scrofa	Unknown	Unknown	Unknown	Male	Unknown	26247636	12791114	0.4873	10826	0.339288	Unknown	Unknown	Unknown
SAMEA5185729	PRJEB30361	SINGLE	ILLUMINA	Illumina HiSeq 3000	Sus scrofa	Unknown	Unknown	Unknown	Female	Unknown	29860072	13323728	0.4462	10255	0.321393	Unknown	Unknown	Unknown
SAMEA5185730	PRJEB30361	SINGLE	ILLUMINA	Illumina HiSeq 3000	Sus scrofa	Unknown	Unknown	Unknown	Female	Unknown	39159241	21660014	0.5531	11859	0.371662	Unknown	Unknown	Unknown
SAMEA5185731	PRJEB30361	SINGLE	ILLUMINA	Illumina HiSeq 3000	Sus scrofa	Unknown	Unknown	Unknown	Female	Unknown	22790726	11400834	0.5002	11217	0.351542	Unknown	Unknown	Unknown
SAMEA5185732	PRJEB30361	SINGLE	ILLUMINA	Illumina HiSeq 3000	Sus scrofa	Unknown	Unknown	Unknown	Male	Unknown	27046832	12931627	0.4781	10521	0.329729	Unknown	Unknown	Unknown
SAMEA5185733	PRJEB30361	SINGLE	ILLUMINA	Illumina HiSeq 3000	Sus scrofa	Unknown	Unknown	Unknown	Female	Unknown	29359947	13733608	0.4678	10277	0.322082	Unknown	Unknown	Unknown
SAMEA5185734	PRJEB30361	SINGLE	ILLUMINA	Illumina HiSeq 3000	Sus scrofa	Unknown	Unknown	Unknown	Female	Unknown	24900258	12708144	0.5104	11527	0.361257	Unknown	Unknown	Unknown
SAMEA5185735	PRJEB30361	SINGLE	ILLUMINA	Illumina HiSeq 3000	Sus scrofa	Unknown	Unknown	Unknown	Female	Unknown	24143735	12185318	0.5047	11312	0.354519	Unknown	Unknown	Unknown
SAMEA5185736	PRJEB30361	SINGLE	ILLUMINA	Illumina HiSeq 3000	Sus scrofa	Unknown	Unknown	Unknown	Male	Unknown	24001772	12229708	0.5095	11576	0.362793	Unknown	Unknown	Unknown
SAMEA5185737	PRJEB30361	SINGLE	ILLUMINA	Illumina HiSeq 3000	Sus scrofa	Unknown	Unknown	Unknown	Female	Unknown	29613093	13095994	0.4422	9631	0.301837	Unknown	Unknown	Unknown
SAMEA5185738	PRJEB30361	SINGLE	ILLUMINA	Illumina HiSeq 3000	Sus scrofa	Unknown	Unknown	Unknown	Female	Unknown	30461009	15563050	0.5109	11547	0.361884	Unknown	Unknown	Unknown
SAMEA5185739	PRJEB30361	SINGLE	ILLUMINA	Illumina HiSeq 3000	Sus scrofa	Unknown	Unknown	Unknown	Female	Unknown	35535831	17506229	0.4926	10454	0.327629	Unknown	Unknown	Unknown
SAMEA5185740	PRJEB30361	SINGLE	ILLUMINA	Illumina HiSeq 3000	Sus scrofa	Unknown	Unknown	Unknown	Male	Unknown	34369306	17849083	0.5193	11386	0.356838	Unknown	Unknown	Unknown
SAMEA5185741	PRJEB30361	SINGLE	ILLUMINA	Illumina HiSeq 3000	Sus scrofa	Unknown	Unknown	Unknown	Female	Unknown	33600046	19468161	0.5794	12326	0.386298	Unknown	Unknown	Unknown
SAMEA5185742	PRJEB30361	SINGLE	ILLUMINA	Illumina HiSeq 3000	Sus scrofa	Unknown	Landrace x Yorkshire	Cross	Female	Unknown	29792467	18099432	0.6075	13239	0.414912	Blood	Blood	Blood
SAMEA5185743	PRJEB30361	SINGLE	ILLUMINA	Illumina HiSeq 3000	Sus scrofa	Unknown	Unknown	Unknown	Female	Unknown	29330635	15151241	0.5166	11574	0.36273	Unknown	Unknown	Unknown
SAMEA5185744	PRJEB30361	SINGLE	ILLUMINA	Illumina HiSeq 3000	Sus scrofa	Unknown	Landrace x Yorkshire	Cross	Female	Unknown	25769651	19979625	0.7753	13616	0.426727	Blood	Blood	Blood
SAMEA5185745	PRJEB30361	SINGLE	ILLUMINA	Illumina HiSeq 3000	Sus scrofa	Unknown	Unknown	Unknown	Female	Unknown	29969535	17022745	0.568	12165	0.381252	Unknown	Unknown	Unknown
SAMEA5185746	PRJEB30361	SINGLE	ILLUMINA	Illumina HiSeq 3000	Sus scrofa	Unknown	Unknown	Unknown	Female	Unknown	31787404	14645020	0.4607	12597	0.394791	Unknown	Unknown	Unknown
SAMEA5185747	PRJEB30361	SINGLE	ILLUMINA	Illumina HiSeq 3000	Sus scrofa	Unknown	Landrace x Yorkshire	Cross	Female	Unknown	25847643	17248199	0.6673	15104	0.473361	Blood	Blood	Blood
SAMEA5185748	PRJEB30361	SINGLE	ILLUMINA	Illumina HiSeq 3000	Sus scrofa	Unknown	Unknown	Unknown	Female	Unknown	29971241	16755679	0.5591	13605	0.426382	Unknown	Unknown	Unknown
SAMEA5185749	PRJEB30361	SINGLE	ILLUMINA	Illumina HiSeq 3000	Sus scrofa	Unknown	Landrace x Yorkshire	Cross	Male	Unknown	34663539	27616697	0.7967	15214	0.476808	Blood	Blood	Blood
SAMEA5185750	PRJEB30361	SINGLE	ILLUMINA	Illumina HiSeq 3000	Sus scrofa	Unknown	Landrace x Yorkshire	Cross	Male	Unknown	30547815	18920444	0.6194	14206	0.445218	Blood	Blood	Blood
SAMEA5185751	PRJEB30361	SINGLE	ILLUMINA	Illumina HiSeq 3000	Sus scrofa	Unknown	Unknown	Unknown	Male	Unknown	29916226	17046336	0.5698	12299	0.385452	Unknown	Unknown	Unknown
SAMEA5185752	PRJEB30361	SINGLE	ILLUMINA	Illumina HiSeq 3000	Sus scrofa	Unknown	Landrace x Yorkshire	Cross	Female	Unknown	44573936	33028609	0.741	15161	0.475147	Blood	Blood	Blood
SAMEA5185753	PRJEB30361	SINGLE	ILLUMINA	Illumina HiSeq 3000	Sus scrofa	Unknown	Landrace x Yorkshire	Cross	Female	Unknown	28322219	17909623	0.6324	13580	0.425599	Blood	Blood	Blood
SAMEA5185754	PRJEB30361	SINGLE	ILLUMINA	Illumina HiSeq 3000	Sus scrofa	Unknown	Landrace x Yorkshire	Cross	Female	Unknown	27181222	18953031	0.6973	13927	0.436474	Blood	Blood	Blood
SAMEA5185755	PRJEB30361	SINGLE	ILLUMINA	Illumina HiSeq 3000	Sus scrofa	Unknown	Landrace x Yorkshire	Cross	Male	Unknown	30951916	19174037	0.6195	13606	0.426413	Blood	Blood	Blood
SAMEA5185756	PRJEB30361	SINGLE	ILLUMINA	Illumina HiSeq 3000	Sus scrofa	Unknown	Landrace x Yorkshire	Cross	Male	Unknown	36675595	27057025	0.7377	14582	0.457001	Blood	Blood	Blood
SAMEA5185757	PRJEB30361	SINGLE	ILLUMINA	Illumina HiSeq 3000	Sus scrofa	Unknown	Unknown	Unknown	Male	Unknown	34407159	20370301	0.592	12501	0.391783	Unknown	Unknown	Unknown
SAMEA5185758	PRJEB30361	SINGLE	ILLUMINA	Illumina HiSeq 3000	Sus scrofa	Unknown	Unknown	Unknown	Female	Unknown	25529263	14995362	0.5874	12293	0.385264	Unknown	Unknown	Unknown
SAMEA5185759	PRJEB30361	SINGLE	ILLUMINA	Illumina HiSeq 3000	Sus scrofa	Unknown	Landrace x Yorkshire	Cross	Female	Unknown	25601181	17723381	0.6923	13552	0.424721	Blood	Blood	Blood
SAMEA5185760	PRJEB30361	SINGLE	ILLUMINA	Illumina HiSeq 3000	Sus scrofa	Unknown	Landrace x Yorkshire	Cross	Female	Unknown	32962685	22479129	0.682	13302	0.416886	Blood	Blood	Blood
SAMEA5185761	PRJEB30361	SINGLE	ILLUMINA	Illumina HiSeq 3000	Sus scrofa	Unknown	Landrace x Yorkshire	Cross	Female	Unknown	36553206	28588005	0.7821	14913	0.467375	Blood	Blood	Blood
SAMEA5185762	PRJEB30361	SINGLE	ILLUMINA	Illumina HiSeq 3000	Sus scrofa	Unknown	Landrace x Yorkshire	Cross	Female	Unknown	37002966	28559211	0.7718	14624	0.458318	Blood	Blood	Blood
SAMEA5185763	PRJEB30361	SINGLE	ILLUMINA	Illumina HiSeq 3000	Sus scrofa	Unknown	Landrace x Yorkshire	Cross	Male	Unknown	32958019	26525438	0.8048	14038	0.439952	Blood	Blood	Blood
SAMEA5185764	PRJEB30361	SINGLE	ILLUMINA	Illumina HiSeq 3000	Sus scrofa	Unknown	Landrace x Yorkshire	Cross	Female	Unknown	29662017	17800717	0.6001	13272	0.415946	Blood	Blood	Blood
SAMEA5185765	PRJEB30361	SINGLE	ILLUMINA	Illumina HiSeq 3000	Sus scrofa	Unknown	Landrace x Yorkshire	Cross	Female	Unknown	32163146	21817234	0.6783	13850	0.43406	Blood	Blood	Blood
SAMEA5185766	PRJEB30361	SINGLE	ILLUMINA	Illumina HiSeq 3000	Sus scrofa	Unknown	Unknown	Unknown	Female	Unknown	32150809	17552082	0.5459	11981	0.375486	Unknown	Unknown	Unknown
SAMEA5185767	PRJEB30361	SINGLE	ILLUMINA	Illumina HiSeq 3000	Sus scrofa	Unknown	Landrace x Yorkshire	Cross	Female	Unknown	28473615	24237718	0.8512	14231	0.446001	Blood	Blood	Blood
SAMEA5185768	PRJEB30361	SINGLE	ILLUMINA	Illumina HiSeq 3000	Sus scrofa	Unknown	Landrace x Yorkshire	Cross	Male	Unknown	32902108	27634789	0.8399	14677	0.459979	Blood	Blood	Blood
SAMEA5185769	PRJEB30361	SINGLE	ILLUMINA	Illumina HiSeq 3000	Sus scrofa	Unknown	Unknown	Unknown	Female	Unknown	40285043	20824041	0.5169	11198	0.350946	Unknown	Unknown	Unknown
SAMEA5185770	PRJEB30361	SINGLE	ILLUMINA	Illumina HiSeq 3000	Sus scrofa	Unknown	Landrace x Yorkshire	Cross	Male	Unknown	33069823	20846619	0.6304	13611	0.42657	Blood	Blood	Blood
SAMEA5185771	PRJEB30361	SINGLE	ILLUMINA	Illumina HiSeq 3000	Sus scrofa	Unknown	Landrace x Yorkshire	Cross	Female	Unknown	30549757	25488455	0.8343	14170	0.444089	Blood	Blood	Blood
SAMEA5185772	PRJEB30361	SINGLE	ILLUMINA	Illumina HiSeq 3000	Sus scrofa	Unknown	Landrace x Yorkshire	Cross	Female	Unknown	27642536	22312442	0.8072	14616	0.458067	Blood	Blood	Blood
SAMEA5185773	PRJEB30361	SINGLE	ILLUMINA	Illumina HiSeq 3000	Sus scrofa	Unknown	Landrace x Yorkshire	Cross	Female	Unknown	31719239	22809792	0.7191	13959	0.437476	Blood	Blood	Blood
SAMEA5185774	PRJEB30361	SINGLE	ILLUMINA	Illumina HiSeq 3000	Sus scrofa	Unknown	Landrace x Yorkshire	Cross	Male	Unknown	28152098	25041762	0.8895	14577	0.456845	Blood	Blood	Blood
SAMEA5185775	PRJEB30361	SINGLE	ILLUMINA	Illumina HiSeq 3000	Sus scrofa	Unknown	Landrace x Yorkshire	Cross	Female	Unknown	31496363	29312155	0.9307	14808	0.464084	Blood	Blood	Blood
SAMEA5185776	PRJEB30361	SINGLE	ILLUMINA	Illumina HiSeq 3000	Sus scrofa	Unknown	Landrace x Yorkshire	Cross	Female	Unknown	36862754	23428039	0.6355	13830	0.433434	Blood	Blood	Blood
SAMEA5185777	PRJEB30361	SINGLE	ILLUMINA	Illumina HiSeq 3000	Sus scrofa	Unknown	Unknown	Unknown	Male	Unknown	31771849	18499908	0.5823	12274	0.384668	Unknown	Unknown	Unknown
SAMEA5185778	PRJEB30361	SINGLE	ILLUMINA	Illumina HiSeq 3000	Sus scrofa	Unknown	Landrace x Yorkshire	Cross	Female	Unknown	28775087	24787011	0.8614	14574	0.456751	Blood	Blood	Blood
SAMEA5185779	PRJEB30361	SINGLE	ILLUMINA	Illumina HiSeq 3000	Sus scrofa	Unknown	Landrace x Yorkshire	Cross	Female	Unknown	30041099	20609145	0.686	14034	0.439827	Blood	Blood	Blood
SAMEA5185780	PRJEB30361	SINGLE	ILLUMINA	Illumina HiSeq 3000	Sus scrofa	Unknown	Unknown	Unknown	Male	Unknown	0	0	0	0	0	Unknown	Unknown	Unknown
SAMEA5185781	PRJEB30361	SINGLE	ILLUMINA	Illumina HiSeq 3000	Sus scrofa	Unknown	Landrace x Yorkshire	Cross	Male	Unknown	26461351	18367347	0.6941	13747	0.430832	Blood	Blood	Blood
SAMEA5185782	PRJEB30361	SINGLE	ILLUMINA	Illumina HiSeq 3000	Sus scrofa	Unknown	Landrace x Yorkshire	Cross	Female	Unknown	43577773	32958236	0.7563	14744	0.462078	Blood	Blood	Blood
SAMEA5185783	PRJEB30361	SINGLE	ILLUMINA	Illumina HiSeq 3000	Sus scrofa	Unknown	Unknown	Unknown	Female	Unknown	42112177	24587628	0.5839	12839	0.402376	Unknown	Unknown	Unknown
SAMEA5185784	PRJEB30361	SINGLE	ILLUMINA	Illumina HiSeq 3000	Sus scrofa	Unknown	Landrace x Yorkshire	Cross	Female	Unknown	28446219	17545000	0.6168	13294	0.416635	Blood	Blood	Blood
SAMEA5185785	PRJEB30361	SINGLE	ILLUMINA	Illumina HiSeq 3000	Sus scrofa	Unknown	Unknown	Unknown	Female	Unknown	31083236	15770324	0.5074	10457	0.327723	Unknown	Unknown	Unknown
SAMEA5185786	PRJEB30361	SINGLE	ILLUMINA	Illumina HiSeq 3000	Sus scrofa	Unknown	Unknown	Unknown	Female	Unknown	33650494	18394755	0.5466	11211	0.351354	Unknown	Unknown	Unknown
SAMEA5185787	PRJEB30361	SINGLE	ILLUMINA	Illumina HiSeq 3000	Sus scrofa	Unknown	Unknown	Unknown	Male	Unknown	34638571	20066227	0.5793	11978	0.375392	Unknown	Unknown	Unknown
SAMEA5185788	PRJEB30361	SINGLE	ILLUMINA	Illumina HiSeq 3000	Sus scrofa	Unknown	Unknown	Unknown	Female	Unknown	28632754	15567424	0.5437	11584	0.363044	Unknown	Unknown	Unknown
SAMEA5185789	PRJEB30361	SINGLE	ILLUMINA	Illumina HiSeq 3000	Sus scrofa	Unknown	Unknown	Unknown	Male	Unknown	33755765	18999329	0.5628	11574	0.36273	Unknown	Unknown	Unknown
SAMEA5185790	PRJEB30361	SINGLE	ILLUMINA	Illumina HiSeq 3000	Sus scrofa	Unknown	Unknown	Unknown	Female	Unknown	32692077	19051627	0.5828	12579	0.394227	Unknown	Unknown	Unknown
SAMEA5185791	PRJEB30361	SINGLE	ILLUMINA	Illumina HiSeq 3000	Sus scrofa	Unknown	Landrace x Yorkshire	Cross	Female	Unknown	32207897	19452430	0.604	13120	0.411182	Blood	Blood	Blood
SAMEA5185792	PRJEB30361	SINGLE	ILLUMINA	Illumina HiSeq 3000	Sus scrofa	Unknown	Unknown	Unknown	Male	Unknown	30604303	15027210	0.491	10085	0.316065	Unknown	Unknown	Unknown
SAMEA5185793	PRJEB30361	SINGLE	ILLUMINA	Illumina HiSeq 3000	Sus scrofa	Unknown	Landrace x Yorkshire	Cross	Female	Unknown	36439701	31912983	0.8758	14511	0.454776	Blood	Blood	Blood
SAMEA5185794	PRJEB30361	SINGLE	ILLUMINA	Illumina HiSeq 3000	Sus scrofa	Unknown	Unknown	Unknown	Male	Unknown	38412499	21441595	0.5582	10818	0.339037	Unknown	Unknown	Unknown
SAMEA5185795	PRJEB30361	SINGLE	ILLUMINA	Illumina HiSeq 3000	Sus scrofa	Unknown	Unknown	Unknown	Male	Unknown	24854884	8725891	0.3511	9576	0.300113	Unknown	Unknown	Unknown
SAMEA5185796	PRJEB30361	SINGLE	ILLUMINA	Illumina HiSeq 3000	Sus scrofa	Unknown	Unknown	Unknown	Male	Unknown	35016237	17839681	0.5095	10655	0.333929	Unknown	Unknown	Unknown
SAMEA5185797	PRJEB30361	SINGLE	ILLUMINA	Illumina HiSeq 3000	Sus scrofa	Unknown	Landrace x Yorkshire	Cross	Female	Unknown	26039712	16536025	0.635	13319	0.417419	Blood	Blood	Blood
SAMEA5185798	PRJEB30361	SINGLE	ILLUMINA	Illumina HiSeq 3000	Sus scrofa	Unknown	Landrace x Yorkshire	Cross	Male	Unknown	28341364	18803847	0.6635	14644	0.458944	Blood	Blood	Blood
SAMEA5185799	PRJEB30361	SINGLE	ILLUMINA	Illumina HiSeq 3000	Sus scrofa	Unknown	Unknown	Unknown	Female	Unknown	28035270	15276944	0.5449	11894	0.372759	Unknown	Unknown	Unknown
SAMEA5185800	PRJEB30361	SINGLE	ILLUMINA	Illumina HiSeq 3000	Sus scrofa	Unknown	Landrace x Yorkshire	Cross	Female	Unknown	30660953	21346645	0.6962	13952	0.437257	Blood	Blood	Blood
SAMEA5185801	PRJEB30361	SINGLE	ILLUMINA	Illumina HiSeq 3000	Sus scrofa	Unknown	Landrace x Yorkshire	Cross	Female	Unknown	32323242	25690228	0.7948	14054	0.440454	Blood	Blood	Blood
SAMEA5185802	PRJEB30361	SINGLE	ILLUMINA	Illumina HiSeq 3000	Sus scrofa	Unknown	Landrace x Yorkshire	Cross	Female	Unknown	31592361	26580333	0.8414	13910	0.435941	Blood	Blood	Blood
SAMEA5185803	PRJEB30361	SINGLE	ILLUMINA	Illumina HiSeq 3000	Sus scrofa	Unknown	Unknown	Unknown	Female	Unknown	30888960	16629738	0.5384	11348	0.355647	Unknown	Unknown	Unknown
SAMEA5185804	PRJEB30361	SINGLE	ILLUMINA	Illumina HiSeq 3000	Sus scrofa	Unknown	Landrace x Yorkshire	Cross	Male	Unknown	32769169	22113511	0.6748	13983	0.438229	Blood	Blood	Blood
SAMEA5185805	PRJEB30361	SINGLE	ILLUMINA	Illumina HiSeq 3000	Sus scrofa	Unknown	Unknown	Unknown	Female	Unknown	33830819	19121688	0.5652	12011	0.376426	Unknown	Unknown	Unknown
SAMEA5185806	PRJEB30361	SINGLE	ILLUMINA	Illumina HiSeq 3000	Sus scrofa	Unknown	Landrace x Yorkshire	Cross	Female	Unknown	37530883	23469434	0.6253	13281	0.416228	Blood	Blood	Blood
SAMEA5185807	PRJEB30361	SINGLE	ILLUMINA	Illumina HiSeq 3000	Sus scrofa	Unknown	Unknown	Unknown	Male	Unknown	37766904	20611172	0.5457	10484	0.32857	Unknown	Unknown	Unknown
SAMEA5335891	PRJEB31242	PAIRED	ILLUMINA	Illumina HiSeq 2000	Sus scrofa	Unknown	Landrace x Yorkshire	Cross	Male	0 day	14562119	9420432	0.6469	11173	0.350163	pEPSC	pEPSC	pEPSC
SAMEA5335892	PRJEB31242	PAIRED	ILLUMINA	Illumina HiSeq 2000	Sus scrofa	Unknown	Landrace x Yorkshire	Cross	Male	0 day	17787643	11422938	0.6422	11946	0.374389	pEPSC	pEPSC	pEPSC
SAMEA5335924	PRJEB31242	PAIRED	ILLUMINA	Illumina HiSeq 2000	Sus scrofa	Unknown	Unknown	Unknown	Male	0 day	19416873	11097893	0.5716	15860	0.497054	Unknown	Unknown	Unknown
SAMEA5335925	PRJEB31242	PAIRED	ILLUMINA	Illumina HiSeq 2000	Sus scrofa	Unknown	Unknown	Unknown	Male	0 day	13472311	12403614	0.9207	14998	0.470039	pEPSC	Other	Other	Outlier
SAMEA5335926	PRJEB31242	PAIRED	ILLUMINA	Illumina HiSeq 2000	Sus scrofa	Unknown	Unknown	Unknown	Male	0 day	32874376	25467832	0.7747	16905	0.529804	pEPSC	Other	Other	Outlier
SAMEA5335927	PRJEB31242	PAIRED	ILLUMINA	Illumina HiSeq 2000	Sus scrofa	Unknown	Unknown	Unknown	Male	0 day	25570811	23537094	0.9205	16082	0.504012	pEPSC	Other	Other	Outlier
SAMEA5335928	PRJEB31242	PAIRED	ILLUMINA	Illumina HiSeq 2000	Sus scrofa	Unknown	Landrace x Yorkshire	Cross	Male	0 day	15159700	13842679	0.9131	15197	0.476276	Skin	Skin	Skin
SAMEA5335929	PRJEB31242	PAIRED	ILLUMINA	Illumina HiSeq 2000	Sus scrofa	Unknown	Landrace x Yorkshire	Cross	Male	0 day	28483118	24321276	0.8539	16261	0.509621	Skin	Skin	Skin
SAMEA5335930	PRJEB31242	PAIRED	ILLUMINA	Illumina HiSeq 2000	Sus scrofa	Unknown	Landrace x Yorkshire	Cross	Male	0 day	24469736	22960678	0.9383	14423	0.452018	Skin	Skin	Skin
SAMEA5335931	PRJEB31242	PAIRED	ILLUMINA	Illumina HiSeq 2000	Sus scrofa	Unknown	Landrace x Yorkshire	Cross	Male	0 day	19587953	18381847	0.9384	14505	0.454588	Skin	Skin	Skin
SAMEA5335932	PRJEB31242	PAIRED	ILLUMINA	Illumina HiSeq 2000	Sus scrofa	Unknown	Landrace x Yorkshire	Cross	Male	0 day	18724290	12633747	0.6747	12355	0.387207	pEPSC induced primordial germ cell	pEPSC	pEPSC
SAMEA5335933	PRJEB31242	PAIRED	ILLUMINA	Illumina HiSeq 2000	Sus scrofa	Unknown	Landrace x Yorkshire	Cross	Male	0 day	18077105	11981500	0.6628	11940	0.374201	pEPSC induced primordial germ cell	pEPSC	pEPSC
SAMEA5335934	PRJEB31242	PAIRED	ILLUMINA	Illumina HiSeq 2000	Sus scrofa	Unknown	Landrace x Yorkshire	Cross	Male	0 day	16221078	10216326	0.6298	12092	0.378965	pEPSC induced primordial germ cell	pEPSC	pEPSC
SAMEA5335935	PRJEB31242	PAIRED	ILLUMINA	Illumina HiSeq 2000	Sus scrofa	Unknown	Landrace x Yorkshire	Cross	Male	0 day	14744728	9407737	0.638	11895	0.372791	pEPSC induced primordial germ cell	pEPSC	pEPSC
SAMEA5337565	PRJEB31259	PAIRED	ILLUMINA	Illumina HiSeq 2000	Sus scrofa	Unknown	Unknown	Unknown	Male	0 day	335253	270849	0.8079	6255	0.196032	Unknown	Unknown	Unknown
SAMEA5337566	PRJEB31259	PAIRED	ILLUMINA	Illumina HiSeq 2000	Sus scrofa	Unknown	Unknown	Unknown	Male	0 day	19645	1192	0.0607	37	0.00115958	Unknown	Unknown	Unknown
SAMEA5337567	PRJEB31259	PAIRED	ILLUMINA	Illumina HiSeq 2000	Sus scrofa	Unknown	Unknown	Unknown	Male	0 day	517104	422931	0.8179	5447	0.17071	pEPSC	pEPSC	pEPSC
SAMEA5337568	PRJEB31259	PAIRED	ILLUMINA	Illumina HiSeq 2000	Sus scrofa	Unknown	Unknown	Unknown	Male	0 day	661353	533316	0.8064	5675	0.177855	pEPSC	pEPSC	pEPSC
SAMEA5337569	PRJEB31259	PAIRED	ILLUMINA	Illumina HiSeq 2000	Sus scrofa	Unknown	Landrace x Yorkshire	Cross	Male	0 day	1233894	1046198	0.8479	6928	0.217124	pEPSC	pEPSC	pEPSC
SAMEA5337570	PRJEB31259	PAIRED	ILLUMINA	Illumina HiSeq 2000	Sus scrofa	Unknown	Unknown	Unknown	Male	0 day	896941	716289	0.7986	5568	0.174502	pEPSC	pEPSC	pEPSC
SAMEA5337571	PRJEB31259	PAIRED	ILLUMINA	Illumina HiSeq 2000	Sus scrofa	Unknown	Unknown	Unknown	Male	0 day	1000237	845156	0.845	6320	0.198069	pEPSC	pEPSC	pEPSC
SAMEA5337572	PRJEB31259	PAIRED	ILLUMINA	Illumina HiSeq 2000	Sus scrofa	Unknown	Unknown	Unknown	Male	0 day	358397	256	0.0007	59	0.00184907	Unknown	Unknown	Unknown
SAMEA5337573	PRJEB31259	PAIRED	ILLUMINA	Illumina HiSeq 2000	Sus scrofa	Unknown	Unknown	Unknown	Male	0 day	673546	553668	0.822	5746	0.18008	pEPSC	pEPSC	pEPSC
SAMEA5337574	PRJEB31259	PAIRED	ILLUMINA	Illumina HiSeq 2000	Sus scrofa	Unknown	Unknown	Unknown	Male	0 day	949082	764341	0.8053	5482	0.171806	pEPSC	pEPSC	pEPSC
SAMEA5337575	PRJEB31259	PAIRED	ILLUMINA	Illumina HiSeq 2000	Sus scrofa	Unknown	Unknown	Unknown	Male	0 day	75041	56826	0.7573	3943	0.123574	Unknown	Unknown	Unknown
SAMEA5337576	PRJEB31259	PAIRED	ILLUMINA	Illumina HiSeq 2000	Sus scrofa	Unknown	Unknown	Unknown	Male	0 day	25052	132	0.0053	36	0.00112824	Unknown	Unknown	Unknown
SAMEA5337577	PRJEB31259	PAIRED	ILLUMINA	Illumina HiSeq 2000	Sus scrofa	Unknown	Unknown	Unknown	Male	0 day	94387	62395	0.6611	2696	0.0844929	Unknown	Unknown	Unknown
SAMEA5337578	PRJEB31259	PAIRED	ILLUMINA	Illumina HiSeq 2000	Sus scrofa	Unknown	Unknown	Unknown	Male	0 day	482108	388251	0.8053	5503	0.172465	Unknown	Unknown	Unknown
SAMEA5337579	PRJEB31259	PAIRED	ILLUMINA	Illumina HiSeq 2000	Sus scrofa	Unknown	Unknown	Unknown	Male	0 day	1073085	879935	0.82	6143	0.192522	pEPSC	pEPSC	pEPSC
SAMEA5337580	PRJEB31259	PAIRED	ILLUMINA	Illumina HiSeq 2000	Sus scrofa	Unknown	Landrace x Yorkshire	Cross	Male	0 day	1628836	1362591	0.8365	6566	0.205779	pEPSC	pEPSC	pEPSC
SAMEA5337581	PRJEB31259	PAIRED	ILLUMINA	Illumina HiSeq 2000	Sus scrofa	Unknown	Unknown	Unknown	Male	0 day	792208	630482	0.7959	4875	0.152783	pEPSC	pEPSC	pEPSC
SAMEA5337582	PRJEB31259	PAIRED	ILLUMINA	Illumina HiSeq 2000	Sus scrofa	Unknown	Unknown	Unknown	Male	0 day	1749391	1426478	0.8154	5798	0.18171	pEPSC	pEPSC	pEPSC
SAMEA5337583	PRJEB31259	PAIRED	ILLUMINA	Illumina HiSeq 2000	Sus scrofa	Unknown	Unknown	Unknown	Male	0 day	286950	203	0.0007	65	0.00203711	Unknown	Unknown	Unknown
SAMEA5337584	PRJEB31259	PAIRED	ILLUMINA	Illumina HiSeq 2000	Sus scrofa	Unknown	Unknown	Unknown	Male	0 day	408440	882	0.0022	216	0.00676946	Unknown	Unknown	Unknown
SAMEA5337585	PRJEB31259	PAIRED	ILLUMINA	Illumina HiSeq 2000	Sus scrofa	Unknown	Unknown	Unknown	Male	0 day	1119435	932250	0.8328	5587	0.175097	pEPSC	pEPSC	pEPSC
SAMEA5337586	PRJEB31259	PAIRED	ILLUMINA	Illumina HiSeq 2000	Sus scrofa	Unknown	Unknown	Unknown	Male	0 day	1610893	1266641	0.7863	5447	0.17071	pEPSC	pEPSC	pEPSC
SAMEA5337587	PRJEB31259	PAIRED	ILLUMINA	Illumina HiSeq 2000	Sus scrofa	Unknown	Unknown	Unknown	Male	0 day	1125484	914566	0.8126	5759	0.180488	pEPSC	pEPSC	pEPSC
SAMEA5337588	PRJEB31259	PAIRED	ILLUMINA	Illumina HiSeq 2000	Sus scrofa	Unknown	Unknown	Unknown	Male	0 day	965943	772385	0.7996	5576	0.174752	pEPSC	pEPSC	pEPSC
SAMEA5337589	PRJEB31259	PAIRED	ILLUMINA	Illumina HiSeq 2000	Sus scrofa	Unknown	Unknown	Unknown	Male	0 day	16185	57	0.0035	15	0.000470102	Unknown	Unknown	Unknown
SAMEA5337590	PRJEB31259	PAIRED	ILLUMINA	Illumina HiSeq 2000	Sus scrofa	Unknown	Unknown	Unknown	Male	0 day	978066	795421	0.8133	5721	0.179297	pEPSC	pEPSC	pEPSC
SAMEA5337591	PRJEB31259	PAIRED	ILLUMINA	Illumina HiSeq 2000	Sus scrofa	Unknown	Unknown	Unknown	Male	0 day	400658	335	0.0008	94	0.00294597	Unknown	Unknown	Unknown
SAMEA5337592	PRJEB31259	PAIRED	ILLUMINA	Illumina HiSeq 2000	Sus scrofa	Unknown	Unknown	Unknown	Male	0 day	338282	625	0.0018	175	0.00548452	Unknown	Unknown	Unknown
SAMEA5337593	PRJEB31259	PAIRED	ILLUMINA	Illumina HiSeq 2000	Sus scrofa	Unknown	Landrace x Yorkshire	Cross	Male	0 day	1486464	1262311	0.8492	6880	0.21562	pEPSC	pEPSC	pEPSC
SAMEA5337594	PRJEB31259	PAIRED	ILLUMINA	Illumina HiSeq 2000	Sus scrofa	Unknown	Unknown	Unknown	Male	0 day	1396051	1163447	0.8334	6258	0.196126	pEPSC	pEPSC	pEPSC
SAMEA5337595	PRJEB31259	PAIRED	ILLUMINA	Illumina HiSeq 2000	Sus scrofa	Unknown	Unknown	Unknown	Male	0 day	1362599	1145582	0.8407	5821	0.182431	pEPSC	pEPSC	pEPSC
SAMEA5337596	PRJEB31259	PAIRED	ILLUMINA	Illumina HiSeq 2000	Sus scrofa	Unknown	Unknown	Unknown	Male	0 day	1626125	1332545	0.8195	6216	0.19481	pEPSC	pEPSC	pEPSC
SAMEA5337597	PRJEB31259	PAIRED	ILLUMINA	Illumina HiSeq 2000	Sus scrofa	Unknown	Unknown	Unknown	Male	0 day	1345942	1119578	0.8318	6066	0.190109	pEPSC	pEPSC	pEPSC
SAMEA5337598	PRJEB31259	PAIRED	ILLUMINA	Illumina HiSeq 2000	Sus scrofa	Unknown	Landrace x Yorkshire	Cross	Male	0 day	2099348	1770079	0.8432	6603	0.206939	pEPSC	pEPSC	pEPSC
SAMEA5337599	PRJEB31259	PAIRED	ILLUMINA	Illumina HiSeq 2000	Sus scrofa	Unknown	Unknown	Unknown	Male	0 day	268977	381	0.0014	119	0.00372947	Unknown	Unknown	Unknown
SAMEA5337600	PRJEB31259	PAIRED	ILLUMINA	Illumina HiSeq 2000	Sus scrofa	Unknown	Unknown	Unknown	Male	0 day	429881	284	0.0007	75	0.00235051	Unknown	Unknown	Unknown
SAMEA5337601	PRJEB31259	PAIRED	ILLUMINA	Illumina HiSeq 2000	Sus scrofa	Unknown	Unknown	Unknown	Male	0 day	105408	82600	0.7836	4622	0.144854	Unknown	Unknown	Unknown
SAMEA5337602	PRJEB31259	PAIRED	ILLUMINA	Illumina HiSeq 2000	Sus scrofa	Unknown	Unknown	Unknown	Male	0 day	884290	722906	0.8175	5813	0.18218	pEPSC	pEPSC	pEPSC
SAMEA5337603	PRJEB31259	PAIRED	ILLUMINA	Illumina HiSeq 2000	Sus scrofa	Unknown	Unknown	Unknown	Male	0 day	1357206	1128575	0.8315	5904	0.185032	pEPSC	pEPSC	pEPSC
SAMEA5337604	PRJEB31259	PAIRED	ILLUMINA	Illumina HiSeq 2000	Sus scrofa	Unknown	Unknown	Unknown	Male	0 day	1555414	1262525	0.8117	6168	0.193306	pEPSC	pEPSC	pEPSC
SAMEA5337605	PRJEB31259	PAIRED	ILLUMINA	Illumina HiSeq 2000	Sus scrofa	Unknown	Unknown	Unknown	Male	0 day	1737758	1444470	0.8312	6236	0.195437	pEPSC	pEPSC	pEPSC
SAMEA5337606	PRJEB31259	PAIRED	ILLUMINA	Illumina HiSeq 2000	Sus scrofa	Unknown	Unknown	Unknown	Male	0 day	1665524	1364003	0.819	5780	0.181146	pEPSC	pEPSC	pEPSC
SAMEA5337607	PRJEB31259	PAIRED	ILLUMINA	Illumina HiSeq 2000	Sus scrofa	Unknown	Unknown	Unknown	Male	0 day	1810202	1496442	0.8267	6262	0.196252	pEPSC	pEPSC	pEPSC
SAMEA5337608	PRJEB31259	PAIRED	ILLUMINA	Illumina HiSeq 2000	Sus scrofa	Unknown	Unknown	Unknown	Male	0 day	759933	939	0.0012	122	0.00382349	Unknown	Unknown	Unknown
SAMEA5337609	PRJEB31259	PAIRED	ILLUMINA	Illumina HiSeq 2000	Sus scrofa	Unknown	Unknown	Unknown	Male	0 day	1638639	1366592	0.834	6256	0.196064	pEPSC	pEPSC	pEPSC
SAMEA5337610	PRJEB31259	PAIRED	ILLUMINA	Illumina HiSeq 2000	Sus scrofa	Unknown	Unknown	Unknown	Male	0 day	1853451	1477701	0.7973	5681	0.178043	pEPSC	pEPSC	pEPSC
SAMEA5337611	PRJEB31259	PAIRED	ILLUMINA	Illumina HiSeq 2000	Sus scrofa	Unknown	Unknown	Unknown	Male	0 day	370398	387	0.001	65	0.00203711	Unknown	Unknown	Unknown
SAMEA5337612	PRJEB31259	PAIRED	ILLUMINA	Illumina HiSeq 2000	Sus scrofa	Unknown	Unknown	Unknown	Male	0 day	1314599	1092486	0.831	6278	0.196753	pEPSC	pEPSC	pEPSC
SAMEA5337613	PRJEB31259	PAIRED	ILLUMINA	Illumina HiSeq 2000	Sus scrofa	Unknown	Unknown	Unknown	Male	0 day	14200	28	0.002	13	0.000407421	Unknown	Unknown	Unknown
SAMEA5337614	PRJEB31259	PAIRED	ILLUMINA	Illumina HiSeq 2000	Sus scrofa	Unknown	Landrace x Yorkshire	Cross	Male	0 day	809272	686425	0.8482	6429	0.201486	pEPSC	pEPSC	pEPSC
SAMEA5337615	PRJEB31259	PAIRED	ILLUMINA	Illumina HiSeq 2000	Sus scrofa	Unknown	Unknown	Unknown	Male	0 day	1054363	886515	0.8408	5978	0.187351	pEPSC	pEPSC	pEPSC
SAMEA5337616	PRJEB31259	PAIRED	ILLUMINA	Illumina HiSeq 2000	Sus scrofa	Unknown	Landrace x Yorkshire	Cross	Male	0 day	1213584	1029587	0.8484	7021	0.220039	pEPSC	pEPSC	pEPSC
SAMEA5337617	PRJEB31259	PAIRED	ILLUMINA	Illumina HiSeq 2000	Sus scrofa	Unknown	Landrace x Yorkshire	Cross	Male	0 day	986409	819960	0.8313	6781	0.212517	pEPSC	pEPSC	pEPSC
SAMEA5337618	PRJEB31259	PAIRED	ILLUMINA	Illumina HiSeq 2000	Sus scrofa	Unknown	Unknown	Unknown	Male	0 day	295888	317	0.0011	72	0.00225649	Unknown	Unknown	Unknown
SAMEA5337619	PRJEB31259	PAIRED	ILLUMINA	Illumina HiSeq 2000	Sus scrofa	Unknown	Unknown	Unknown	Male	0 day	460324	700	0.0015	208	0.00651874	Unknown	Unknown	Unknown
SAMEA5337620	PRJEB31259	PAIRED	ILLUMINA	Illumina HiSeq 2000	Sus scrofa	Unknown	Unknown	Unknown	Male	0 day	1560430	1290616	0.8271	6366	0.199511	pEPSC	pEPSC	pEPSC
SAMEA5337621	PRJEB31259	PAIRED	ILLUMINA	Illumina HiSeq 2000	Sus scrofa	Unknown	Unknown	Unknown	Male	0 day	1269032	1046406	0.8246	5627	0.176351	pEPSC	pEPSC	pEPSC
SAMEA5337622	PRJEB31259	PAIRED	ILLUMINA	Illumina HiSeq 2000	Sus scrofa	Unknown	Landrace x Yorkshire	Cross	Male	0 day	1019539	869301	0.8526	6542	0.205027	pEPSC	pEPSC	pEPSC
SAMEA5337623	PRJEB31259	PAIRED	ILLUMINA	Illumina HiSeq 2000	Sus scrofa	Unknown	Unknown	Unknown	Male	0 day	1003528	824625	0.8217	5694	0.178451	pEPSC	pEPSC	pEPSC
SAMEA5337624	PRJEB31259	PAIRED	ILLUMINA	Illumina HiSeq 2000	Sus scrofa	Unknown	Unknown	Unknown	Male	0 day	920631	776156	0.8431	6072	0.190297	pEPSC	pEPSC	pEPSC
SAMEA5337625	PRJEB31259	PAIRED	ILLUMINA	Illumina HiSeq 2000	Sus scrofa	Unknown	Unknown	Unknown	Male	0 day	75672	47079	0.6221	857	0.0268585	Unknown	Unknown	Unknown
SAMEA5337626	PRJEB31259	PAIRED	ILLUMINA	Illumina HiSeq 2000	Sus scrofa	Unknown	Unknown	Unknown	Male	0 day	992868	812198	0.818	5762	0.180582	pEPSC	pEPSC	pEPSC
SAMEA5337627	PRJEB31259	PAIRED	ILLUMINA	Illumina HiSeq 2000	Sus scrofa	Unknown	Unknown	Unknown	Male	0 day	1323350	1088773	0.8227	5492	0.17212	pEPSC	pEPSC	pEPSC
SAMEA5337628	PRJEB31259	PAIRED	ILLUMINA	Illumina HiSeq 2000	Sus scrofa	Unknown	Unknown	Unknown	Male	0 day	1394507	1138137	0.8162	6125	0.191958	pEPSC	pEPSC	pEPSC
SAMEA5337629	PRJEB31259	PAIRED	ILLUMINA	Illumina HiSeq 2000	Sus scrofa	Unknown	Unknown	Unknown	Male	0 day	1777050	1426419	0.8027	4726	0.148113	pEPSC	pEPSC	pEPSC
SAMEA5337630	PRJEB31259	PAIRED	ILLUMINA	Illumina HiSeq 2000	Sus scrofa	Unknown	Unknown	Unknown	Male	0 day	385979	529	0.0014	146	0.00457566	Unknown	Unknown	Unknown
SAMEA5337631	PRJEB31259	PAIRED	ILLUMINA	Illumina HiSeq 2000	Sus scrofa	Unknown	Unknown	Unknown	Male	0 day	443625	719	0.0016	201	0.00629936	Unknown	Unknown	Unknown
SAMEA5337632	PRJEB31259	PAIRED	ILLUMINA	Illumina HiSeq 2000	Sus scrofa	Unknown	Unknown	Unknown	Male	0 day	2076557	1706400	0.8217	5547	0.173844	pEPSC	pEPSC	pEPSC
SAMEA5337633	PRJEB31259	PAIRED	ILLUMINA	Illumina HiSeq 2000	Sus scrofa	Unknown	Landrace x Yorkshire	Cross	Male	0 day	1263256	1061821	0.8405	6472	0.202833	pEPSC	pEPSC	pEPSC
SAMEA5337634	PRJEB31259	PAIRED	ILLUMINA	Illumina HiSeq 2000	Sus scrofa	Unknown	Landrace x Yorkshire	Cross	Male	0 day	1745613	1491859	0.8546	6668	0.208976	pEPSC	pEPSC	pEPSC
SAMEA5337635	PRJEB31259	PAIRED	ILLUMINA	Illumina HiSeq 2000	Sus scrofa	Unknown	Unknown	Unknown	Male	0 day	1171721	951931	0.8124	6231	0.19528	pEPSC	pEPSC	pEPSC
SAMEA5337636	PRJEB31259	PAIRED	ILLUMINA	Illumina HiSeq 2000	Sus scrofa	Unknown	Unknown	Unknown	Male	0 day	1257509	1059694	0.8427	6344	0.198822	pEPSC	pEPSC	pEPSC
SAMEA5337637	PRJEB31259	PAIRED	ILLUMINA	Illumina HiSeq 2000	Sus scrofa	Unknown	Unknown	Unknown	Male	0 day	72965	57724	0.7911	3865	0.121129	Unknown	Unknown	Unknown
SAMEA5337638	PRJEB31259	PAIRED	ILLUMINA	Illumina HiSeq 2000	Sus scrofa	Unknown	Unknown	Unknown	Male	0 day	415	221	0.5325	72	0.00225649	Unknown	Unknown	Unknown
SAMEA5337639	PRJEB31259	PAIRED	ILLUMINA	Illumina HiSeq 2000	Sus scrofa	Unknown	Unknown	Unknown	Male	0 day	547412	7019	0.0128	520	0.0162969	Unknown	Unknown	Unknown
SAMEA5337640	PRJEB31259	PAIRED	ILLUMINA	Illumina HiSeq 2000	Sus scrofa	Unknown	Unknown	Unknown	Male	0 day	592233	2596	0.0044	637	0.0199636	Unknown	Unknown	Unknown
SAMEA5337641	PRJEB31259	PAIRED	ILLUMINA	Illumina HiSeq 2000	Sus scrofa	Unknown	Unknown	Unknown	Male	0 day	1629100	1365568	0.8382	6291	0.197161	pEPSC	pEPSC	pEPSC
SAMEA5337642	PRJEB31259	PAIRED	ILLUMINA	Illumina HiSeq 2000	Sus scrofa	Unknown	Landrace x Yorkshire	Cross	Male	0 day	1991530	1651366	0.8292	6720	0.210605	pEPSC	pEPSC	pEPSC
SAMEA5337643	PRJEB31259	PAIRED	ILLUMINA	Illumina HiSeq 2000	Sus scrofa	Unknown	Landrace x Yorkshire	Cross	Male	0 day	2440427	1965905	0.8056	7118	0.223079	pEPSC	pEPSC	pEPSC
SAMEA5337644	PRJEB31259	PAIRED	ILLUMINA	Illumina HiSeq 2000	Sus scrofa	Unknown	Landrace x Yorkshire	Cross	Male	0 day	2164692	1813120	0.8376	6440	0.20183	pEPSC	pEPSC	pEPSC
SAMEA5337645	PRJEB31259	PAIRED	ILLUMINA	Illumina HiSeq 2000	Sus scrofa	Unknown	Unknown	Unknown	Male	0 day	1622278	1349403	0.8318	6199	0.194277	pEPSC	pEPSC	pEPSC
SAMEA5337646	PRJEB31259	PAIRED	ILLUMINA	Illumina HiSeq 2000	Sus scrofa	Unknown	Unknown	Unknown	Male	0 day	726172	604466	0.8324	5698	0.178576	pEPSC	pEPSC	pEPSC
SAMEA5337647	PRJEB31259	PAIRED	ILLUMINA	Illumina HiSeq 2000	Sus scrofa	Unknown	Unknown	Unknown	Male	0 day	557843	502	0.0009	123	0.00385483	Unknown	Unknown	Unknown
SAMEA5337648	PRJEB31259	PAIRED	ILLUMINA	Illumina HiSeq 2000	Sus scrofa	Unknown	Unknown	Unknown	Male	0 day	532994	429700	0.8062	5159	0.161684	pEPSC	pEPSC	pEPSC
SAMEA5337649	PRJEB31259	PAIRED	ILLUMINA	Illumina HiSeq 2000	Sus scrofa	Unknown	Unknown	Unknown	Male	0 day	311425	245786	0.7892	5769	0.180801	Unknown	Unknown	Unknown
SAMEA5337650	PRJEB31259	PAIRED	ILLUMINA	Illumina HiSeq 2000	Sus scrofa	Unknown	Unknown	Unknown	Male	0 day	869880	737758	0.8481	6211	0.194653	pEPSC	pEPSC	pEPSC
SAMEA5337651	PRJEB31259	PAIRED	ILLUMINA	Illumina HiSeq 2000	Sus scrofa	Unknown	Unknown	Unknown	Male	0 day	1058377	889431	0.8404	6174	0.193494	pEPSC	pEPSC	pEPSC
SAMEA5337652	PRJEB31259	PAIRED	ILLUMINA	Illumina HiSeq 2000	Sus scrofa	Unknown	Unknown	Unknown	Male	0 day	644823	255610	0.3964	432	0.0135389	Unknown	Unknown	Unknown
SAMEA5337653	PRJEB31259	PAIRED	ILLUMINA	Illumina HiSeq 2000	Sus scrofa	Unknown	Unknown	Unknown	Male	0 day	1352221	1096652	0.811	6110	0.191488	pEPSC	pEPSC	pEPSC
SAMEA5337654	PRJEB31259	PAIRED	ILLUMINA	Illumina HiSeq 2000	Sus scrofa	Unknown	Unknown	Unknown	Male	0 day	1805937	1491386	0.8258	6334	0.198508	pEPSC	pEPSC	pEPSC
SAMEA5337655	PRJEB31259	PAIRED	ILLUMINA	Illumina HiSeq 2000	Sus scrofa	Unknown	Unknown	Unknown	Male	0 day	458338	383	0.0008	82	0.00256989	Unknown	Unknown	Unknown
SAMEA5337656	PRJEB31259	PAIRED	ILLUMINA	Illumina HiSeq 2000	Sus scrofa	Unknown	Unknown	Unknown	Male	0 day	1842792	1478166	0.8021	4974	0.155886	pEPSC	pEPSC	pEPSC
SAMEA5337657	PRJEB31259	PAIRED	ILLUMINA	Illumina HiSeq 2000	Sus scrofa	Unknown	Unknown	Unknown	Male	0 day	1496926	1204954	0.805	5276	0.16535	pEPSC	pEPSC	pEPSC
SAMEA5337658	PRJEB31259	PAIRED	ILLUMINA	Illumina HiSeq 2000	Sus scrofa	Unknown	Unknown	Unknown	Male	0 day	532212	164193	0.3085	1269	0.0397706	Unknown	Unknown	Unknown
SAMEA5337659	PRJEB31259	PAIRED	ILLUMINA	Illumina HiSeq 2000	Sus scrofa	Unknown	Unknown	Unknown	Male	0 day	1758501	1419241	0.8071	5729	0.179547	pEPSC	pEPSC	pEPSC
SAMEA5337660	PRJEB31259	PAIRED	ILLUMINA	Illumina HiSeq 2000	Sus scrofa	Unknown	Unknown	Unknown	Male	0 day	297961	246165	0.8262	6279	0.196785	Unknown	Unknown	Unknown
SAMEA5337661	PRJEB31259	PAIRED	ILLUMINA	Illumina HiSeq 2000	Sus scrofa	Unknown	Unknown	Unknown	Male	0 day	25647	9562	0.3728	1198	0.0375454	Unknown	Unknown	Unknown
SAMEA5337662	PRJEB31259	PAIRED	ILLUMINA	Illumina HiSeq 2000	Sus scrofa	Unknown	Unknown	Unknown	Male	0 day	483106	340764	0.7054	5879	0.184248	Unknown	Unknown	Unknown
SAMEA5337663	PRJEB31259	PAIRED	ILLUMINA	Illumina HiSeq 2000	Sus scrofa	Unknown	Unknown	Unknown	Male	0 day	518308	366601	0.7073	4916	0.154068	pEPSC	pEPSC	pEPSC
SAMEA5337664	PRJEB31259	PAIRED	ILLUMINA	Illumina HiSeq 2000	Sus scrofa	Unknown	Landrace x Yorkshire	Cross	Male	0 day	1047302	772160	0.7373	6510	0.204024	pEPSC	pEPSC	pEPSC
SAMEA5337665	PRJEB31259	PAIRED	ILLUMINA	Illumina HiSeq 2000	Sus scrofa	Unknown	Unknown	Unknown	Male	0 day	1596989	1215760	0.7613	6364	0.199448	pEPSC	pEPSC	pEPSC
SAMEA5337666	PRJEB31259	PAIRED	ILLUMINA	Illumina HiSeq 2000	Sus scrofa	Unknown	Landrace x Yorkshire	Cross	Male	0 day	1333376	1055335	0.7915	6398	0.200514	pEPSC	pEPSC	pEPSC
SAMEA5337667	PRJEB31259	PAIRED	ILLUMINA	Illumina HiSeq 2000	Sus scrofa	Unknown	Unknown	Unknown	Male	0 day	1279625	993068	0.7761	6041	0.189326	pEPSC	pEPSC	pEPSC
SAMEA5337668	PRJEB31259	PAIRED	ILLUMINA	Illumina HiSeq 2000	Sus scrofa	Unknown	Unknown	Unknown	Male	0 day	773605	616005	0.7963	6040	0.189294	pEPSC	pEPSC	pEPSC
SAMEA5337669	PRJEB31259	PAIRED	ILLUMINA	Illumina HiSeq 2000	Sus scrofa	Unknown	Landrace x Yorkshire	Cross	Male	0 day	822770	639948	0.7778	6413	0.200984	Embryo	Embryo	Embryo
SAMEA5337670	PRJEB31259	PAIRED	ILLUMINA	Illumina HiSeq 2000	Sus scrofa	Unknown	Unknown	Unknown	Male	0 day	679581	515635	0.7588	5187	0.162561	pEPSC	pEPSC	pEPSC
SAMEA5337671	PRJEB31259	PAIRED	ILLUMINA	Illumina HiSeq 2000	Sus scrofa	Unknown	Unknown	Unknown	Male	0 day	1075528	186570	0.1735	493	0.0154507	Unknown	Unknown	Unknown
SAMEA5337672	PRJEB31259	PAIRED	ILLUMINA	Illumina HiSeq 2000	Sus scrofa	Unknown	Unknown	Unknown	Male	0 day	568546	431041	0.7581	5933	0.185941	pEPSC	pEPSC	pEPSC
SAMEA5337673	PRJEB31259	PAIRED	ILLUMINA	Illumina HiSeq 2000	Sus scrofa	Unknown	Unknown	Unknown	Male	0 day	250433	186173	0.7434	5426	0.170051	Unknown	Unknown	Unknown
SAMEA5337674	PRJEB31259	PAIRED	ILLUMINA	Illumina HiSeq 2000	Sus scrofa	Unknown	Unknown	Unknown	Male	0 day	1147	366	0.3191	115	0.00360411	Unknown	Unknown	Unknown
SAMEA5337675	PRJEB31259	PAIRED	ILLUMINA	Illumina HiSeq 2000	Sus scrofa	Unknown	Unknown	Unknown	Male	0 day	806613	614581	0.7619	5794	0.181585	pEPSC	pEPSC	pEPSC
SAMEA5337676	PRJEB31259	PAIRED	ILLUMINA	Illumina HiSeq 2000	Sus scrofa	Unknown	Unknown	Unknown	Male	0 day	894724	696390	0.7783	5501	0.172402	pEPSC	pEPSC	pEPSC
SAMEA5337677	PRJEB31259	PAIRED	ILLUMINA	Illumina HiSeq 2000	Sus scrofa	Unknown	Landrace x Yorkshire	Cross	Male	0 day	1076903	845040	0.7847	6686	0.20954	pEPSC	pEPSC	pEPSC
SAMEA5337678	PRJEB31259	PAIRED	ILLUMINA	Illumina HiSeq 2000	Sus scrofa	Unknown	Unknown	Unknown	Male	0 day	1139714	894150	0.7845	6768	0.21211	pEPSC	pEPSC	pEPSC
SAMEA5337679	PRJEB31259	PAIRED	ILLUMINA	Illumina HiSeq 2000	Sus scrofa	Unknown	Unknown	Unknown	Male	0 day	311881	332	0.0011	83	0.00260123	Unknown	Unknown	Unknown
SAMEA5337680	PRJEB31259	PAIRED	ILLUMINA	Illumina HiSeq 2000	Sus scrofa	Unknown	Unknown	Unknown	Male	0 day	939951	718760	0.7647	6188	0.193933	pEPSC	pEPSC	pEPSC
SAMEA5337681	PRJEB31259	PAIRED	ILLUMINA	Illumina HiSeq 2000	Sus scrofa	Unknown	Unknown	Unknown	Male	0 day	1213823	960771	0.7915	5805	0.181929	pEPSC	pEPSC	pEPSC
SAMEA5337682	PRJEB31259	PAIRED	ILLUMINA	Illumina HiSeq 2000	Sus scrofa	Unknown	Unknown	Unknown	Male	0 day	739700	587488	0.7942	5619	0.1761	pEPSC	pEPSC	pEPSC
SAMEA5337683	PRJEB31259	PAIRED	ILLUMINA	Illumina HiSeq 2000	Sus scrofa	Unknown	Unknown	Unknown	Male	0 day	407973	165	0.0004	45	0.0014103	Unknown	Unknown	Unknown
SAMEA5337684	PRJEB31259	PAIRED	ILLUMINA	Illumina HiSeq 2000	Sus scrofa	Unknown	Unknown	Unknown	Male	0 day	155941	127	0.0008	42	0.00131628	Unknown	Unknown	Unknown
SAMEA5337685	PRJEB31259	PAIRED	ILLUMINA	Illumina HiSeq 2000	Sus scrofa	Unknown	Unknown	Unknown	Male	0 day	853503	675539	0.7915	6088	0.190799	pEPSC	pEPSC	pEPSC
SAMEA5337686	PRJEB31259	PAIRED	ILLUMINA	Illumina HiSeq 2000	Sus scrofa	Unknown	Unknown	Unknown	Male	0 day	463552	352479	0.7604	5797	0.181679	Unknown	Unknown	Unknown
SAMEA5337687	PRJEB31259	PAIRED	ILLUMINA	Illumina HiSeq 2000	Sus scrofa	Unknown	Landrace x Yorkshire	Cross	Male	0 day	1520653	1181055	0.7767	6633	0.207879	pEPSC	pEPSC	pEPSC
SAMEA5337688	PRJEB31259	PAIRED	ILLUMINA	Illumina HiSeq 2000	Sus scrofa	Unknown	Unknown	Unknown	Male	0 day	1386868	1083617	0.7813	5445	0.170647	pEPSC	pEPSC	pEPSC
SAMEA5337689	PRJEB31259	PAIRED	ILLUMINA	Illumina HiSeq 2000	Sus scrofa	Unknown	Landrace x Yorkshire	Cross	Male	0 day	1503233	1193981	0.7943	7307	0.229002	Embryo	Embryo	Embryo
SAMEA5337690	PRJEB31259	PAIRED	ILLUMINA	Illumina HiSeq 2000	Sus scrofa	Unknown	Landrace x Yorkshire	Cross	Male	0 day	1519805	1248887	0.8217	6941	0.217532	pEPSC	pEPSC	pEPSC
SAMEA5337691	PRJEB31259	PAIRED	ILLUMINA	Illumina HiSeq 2000	Sus scrofa	Unknown	Unknown	Unknown	Male	0 day	1446230	1202547	0.8315	5992	0.18779	pEPSC	pEPSC	pEPSC
SAMEA5337692	PRJEB31259	PAIRED	ILLUMINA	Illumina HiSeq 2000	Sus scrofa	Unknown	Unknown	Unknown	Male	0 day	1281988	1029424	0.803	5774	0.180958	pEPSC	pEPSC	pEPSC
SAMEA5337693	PRJEB31259	PAIRED	ILLUMINA	Illumina HiSeq 2000	Sus scrofa	Unknown	Unknown	Unknown	Male	0 day	1362513	1107607	0.8129	5410	0.16955	pEPSC	pEPSC	pEPSC
SAMEA5337694	PRJEB31259	PAIRED	ILLUMINA	Illumina HiSeq 2000	Sus scrofa	Unknown	Unknown	Unknown	Male	0 day	91222	4672	0.0512	90	0.00282061	Unknown	Unknown	Unknown
SAMEA5337695	PRJEB31259	PAIRED	ILLUMINA	Illumina HiSeq 2000	Sus scrofa	Unknown	Unknown	Unknown	Male	0 day	1436221	1033825	0.7198	5525	0.173154	pEPSC	pEPSC	pEPSC
SAMEA5337696	PRJEB31259	PAIRED	ILLUMINA	Illumina HiSeq 2000	Sus scrofa	Unknown	Unknown	Unknown	Male	0 day	1211642	892158	0.7363	5279	0.165444	pEPSC	pEPSC	pEPSC
SAMEA5337697	PRJEB31259	PAIRED	ILLUMINA	Illumina HiSeq 2000	Sus scrofa	Unknown	Unknown	Unknown	Male	0 day	385204	288907	0.75	6008	0.188291	Unknown	Unknown	Unknown
SAMEA5337698	PRJEB31259	PAIRED	ILLUMINA	Illumina HiSeq 2000	Sus scrofa	Unknown	Unknown	Unknown	Male	0 day	61856	46835	0.7572	3667	0.114924	Unknown	Unknown	Unknown
SAMEA5337699	PRJEB31259	PAIRED	ILLUMINA	Illumina HiSeq 2000	Sus scrofa	Unknown	Landrace x Yorkshire	Cross	Male	0 day	2106043	1595685	0.7577	6546	0.205152	Embryo	Embryo	Embryo
SAMEA5337700	PRJEB31259	PAIRED	ILLUMINA	Illumina HiSeq 2000	Sus scrofa	Unknown	Unknown	Unknown	Male	0 day	1212158	858748	0.7084	5370	0.168296	pEPSC	pEPSC	pEPSC
SAMEA5337701	PRJEB31259	PAIRED	ILLUMINA	Illumina HiSeq 2000	Sus scrofa	Unknown	Landrace x Yorkshire	Cross	Male	0 day	1553456	1197607	0.7709	6733	0.211013	pEPSC	pEPSC	pEPSC
SAMEA5337702	PRJEB31259	PAIRED	ILLUMINA	Illumina HiSeq 2000	Sus scrofa	Unknown	Landrace x Yorkshire	Cross	Male	0 day	1954347	1515355	0.7754	6710	0.210292	pEPSC	pEPSC	pEPSC
SAMEA5337703	PRJEB31259	PAIRED	ILLUMINA	Illumina HiSeq 2000	Sus scrofa	Unknown	Unknown	Unknown	Male	0 day	1550899	1215923	0.784	6187	0.193901	pEPSC	pEPSC	pEPSC
SAMEA5337704	PRJEB31259	PAIRED	ILLUMINA	Illumina HiSeq 2000	Sus scrofa	Unknown	Landrace x Yorkshire	Cross	Male	0 day	1488511	1178668	0.7918	6443	0.201924	pEPSC	pEPSC	pEPSC
SAMEA5337705	PRJEB31259	PAIRED	ILLUMINA	Illumina HiSeq 2000	Sus scrofa	Unknown	Unknown	Unknown	Male	0 day	1839673	1439768	0.7826	5611	0.175849	pEPSC	pEPSC	pEPSC
SAMEA5337706	PRJEB31259	PAIRED	ILLUMINA	Illumina HiSeq 2000	Sus scrofa	Unknown	Unknown	Unknown	Male	0 day	445356	356277	0.8	5686	0.1782	Unknown	Unknown	Unknown
SAMEA5337707	PRJEB31259	PAIRED	ILLUMINA	Illumina HiSeq 2000	Sus scrofa	Unknown	Unknown	Unknown	Male	0 day	6888	675	0.098	188	0.00589194	Unknown	Unknown	Unknown
SAMEA5337708	PRJEB31259	PAIRED	ILLUMINA	Illumina HiSeq 2000	Sus scrofa	Unknown	Unknown	Unknown	Male	0 day	1088422	859494	0.7897	5889	0.184562	pEPSC	pEPSC	pEPSC
SAMEA5337709	PRJEB31259	PAIRED	ILLUMINA	Illumina HiSeq 2000	Sus scrofa	Unknown	Unknown	Unknown	Male	0 day	893677	671626	0.7515	6210	0.194622	Embryo	Embryo	Embryo
SAMEA5337710	PRJEB31259	PAIRED	ILLUMINA	Illumina HiSeq 2000	Sus scrofa	Unknown	Unknown	Unknown	Male	0 day	1091466	736294	0.6746	4688	0.146922	pEPSC	pEPSC	pEPSC
SAMEA5337711	PRJEB31259	PAIRED	ILLUMINA	Illumina HiSeq 2000	Sus scrofa	Unknown	Unknown	Unknown	Male	0 day	1375985	1022828	0.7433	5629	0.176413	pEPSC	pEPSC	pEPSC
SAMEA5337712	PRJEB31259	PAIRED	ILLUMINA	Illumina HiSeq 2000	Sus scrofa	Unknown	Unknown	Unknown	Male	0 day	1349647	975633	0.7229	5555	0.174094	pEPSC	pEPSC	pEPSC
SAMEA5337713	PRJEB31259	PAIRED	ILLUMINA	Illumina HiSeq 2000	Sus scrofa	Unknown	Unknown	Unknown	Male	0 day	1737237	1372971	0.7903	6300	0.197443	pEPSC	pEPSC	pEPSC
SAMEA5337714	PRJEB31259	PAIRED	ILLUMINA	Illumina HiSeq 2000	Sus scrofa	Unknown	Unknown	Unknown	Male	0 day	137094	331	0.0024	94	0.00294597	Unknown	Unknown	Unknown
SAMEA5337715	PRJEB31259	PAIRED	ILLUMINA	Illumina HiSeq 2000	Sus scrofa	Unknown	Unknown	Unknown	Male	0 day	1473112	1146834	0.7785	6181	0.193713	pEPSC	pEPSC	pEPSC
SAMEA5337716	PRJEB31259	PAIRED	ILLUMINA	Illumina HiSeq 2000	Sus scrofa	Unknown	Landrace x Yorkshire	Cross	Male	0 day	1444714	1200471	0.8309	7109	0.222797	pEPSC	pEPSC	pEPSC
SAMEA5337717	PRJEB31259	PAIRED	ILLUMINA	Illumina HiSeq 2000	Sus scrofa	Unknown	Unknown	Unknown	Male	0 day	1233001	980702	0.7954	5917	0.185439	pEPSC	pEPSC	pEPSC
SAMEA5337718	PRJEB31259	PAIRED	ILLUMINA	Illumina HiSeq 2000	Sus scrofa	Unknown	Unknown	Unknown	Male	0 day	981490	795817	0.8108	5812	0.182149	pEPSC	pEPSC	pEPSC
SAMEA5337719	PRJEB31259	PAIRED	ILLUMINA	Illumina HiSeq 2000	Sus scrofa	Unknown	Unknown	Unknown	Male	0 day	994252	758470	0.7629	6541	0.204996	Embryo	Embryo	Embryo
SAMEA5337720	PRJEB31259	PAIRED	ILLUMINA	Illumina HiSeq 2000	Sus scrofa	Unknown	Unknown	Unknown	Male	0 day	640886	497816	0.7768	5587	0.175097	pEPSC	pEPSC	pEPSC
SAMEA5337721	PRJEB31259	PAIRED	ILLUMINA	Illumina HiSeq 2000	Sus scrofa	Unknown	Unknown	Unknown	Male	0 day	689244	558513	0.8103	5967	0.187006	pEPSC	pEPSC	pEPSC
SAMEA5337722	PRJEB31259	PAIRED	ILLUMINA	Illumina HiSeq 2000	Sus scrofa	Unknown	Landrace x Yorkshire	Cross	Male	0 day	1111962	920011	0.8274	6895	0.21609	pEPSC	pEPSC	pEPSC
SAMEA5337723	PRJEB31259	PAIRED	ILLUMINA	Illumina HiSeq 2000	Sus scrofa	Unknown	Unknown	Unknown	Male	0 day	1283421	993974	0.7745	6289	0.197098	pEPSC	pEPSC	pEPSC
SAMEA5337724	PRJEB31259	PAIRED	ILLUMINA	Illumina HiSeq 2000	Sus scrofa	Unknown	Unknown	Unknown	Male	0 day	1135428	912980	0.8041	5680	0.178012	pEPSC	pEPSC	pEPSC
SAMEA5337725	PRJEB31259	PAIRED	ILLUMINA	Illumina HiSeq 2000	Sus scrofa	Unknown	Landrace x Yorkshire	Cross	Male	0 day	1416357	1151914	0.8133	6909	0.216529	pEPSC	pEPSC	pEPSC
SAMEA5337726	PRJEB31259	PAIRED	ILLUMINA	Illumina HiSeq 2000	Sus scrofa	Unknown	Unknown	Unknown	Male	0 day	1214747	990852	0.8157	6077	0.190454	pEPSC	pEPSC	pEPSC
SAMEA5337727	PRJEB31259	PAIRED	ILLUMINA	Illumina HiSeq 2000	Sus scrofa	Unknown	Landrace x Yorkshire	Cross	Male	0 day	1266947	1013779	0.8002	6561	0.205622	pEPSC	pEPSC	pEPSC
SAMEA5337728	PRJEB31259	PAIRED	ILLUMINA	Illumina HiSeq 2000	Sus scrofa	Unknown	Landrace x Yorkshire	Cross	Male	0 day	1405290	1117171	0.795	6434	0.201642	pEPSC	pEPSC	pEPSC
SAMEA5337729	PRJEB31259	PAIRED	ILLUMINA	Illumina HiSeq 2000	Sus scrofa	Unknown	Landrace x Yorkshire	Cross	Male	0 day	1314714	1062796	0.8084	6729	0.210888	Embryo	Embryo	Embryo
SAMEA5337730	PRJEB31259	PAIRED	ILLUMINA	Illumina HiSeq 2000	Sus scrofa	Unknown	Landrace x Yorkshire	Cross	Male	0 day	1238496	988914	0.7985	6560	0.205591	pEPSC	pEPSC	pEPSC
SAMEA5337731	PRJEB31259	PAIRED	ILLUMINA	Illumina HiSeq 2000	Sus scrofa	Unknown	Unknown	Unknown	Male	0 day	1214649	965678	0.795	5872	0.184029	pEPSC	pEPSC	pEPSC
SAMEA5337732	PRJEB31259	PAIRED	ILLUMINA	Illumina HiSeq 2000	Sus scrofa	Unknown	Unknown	Unknown	Male	0 day	1182079	933048	0.7893	6088	0.190799	pEPSC	pEPSC	pEPSC
SAMEA5337733	PRJEB31259	PAIRED	ILLUMINA	Illumina HiSeq 2000	Sus scrofa	Unknown	Landrace x Yorkshire	Cross	Male	0 day	937307	750920	0.8011	6414	0.201015	pEPSC	pEPSC	pEPSC
SAMEA5337734	PRJEB31259	PAIRED	ILLUMINA	Illumina HiSeq 2000	Sus scrofa	Unknown	Landrace x Yorkshire	Cross	Male	0 day	1206108	968897	0.8033	6470	0.20277	pEPSC	pEPSC	pEPSC
SAMEA5337735	PRJEB31259	PAIRED	ILLUMINA	Illumina HiSeq 2000	Sus scrofa	Unknown	Landrace x Yorkshire	Cross	Male	0 day	1601923	1297212	0.8098	6854	0.214805	pEPSC	pEPSC	pEPSC
SAMEA5337736	PRJEB31259	PAIRED	ILLUMINA	Illumina HiSeq 2000	Sus scrofa	Unknown	Unknown	Unknown	Male	0 day	1596784	1276712	0.7996	6107	0.191394	pEPSC	pEPSC	pEPSC
SAMEA5337737	PRJEB31259	PAIRED	ILLUMINA	Illumina HiSeq 2000	Sus scrofa	Unknown	Unknown	Unknown	Male	0 day	2189065	1727301	0.7891	5325	0.166886	pEPSC	pEPSC	pEPSC
SAMEA5337738	PRJEB31259	PAIRED	ILLUMINA	Illumina HiSeq 2000	Sus scrofa	Unknown	Unknown	Unknown	Male	0 day	2161794	1792879	0.8293	6354	0.199135	pEPSC	pEPSC	pEPSC
SAMEA5337739	PRJEB31259	PAIRED	ILLUMINA	Illumina HiSeq 2000	Sus scrofa	Unknown	Landrace x Yorkshire	Cross	Male	0 day	1738857	1416556	0.8146	6693	0.209759	Embryo	Embryo	Embryo
SAMEA5337740	PRJEB31259	PAIRED	ILLUMINA	Illumina HiSeq 2000	Sus scrofa	Unknown	Landrace x Yorkshire	Cross	Male	0 day	1712196	1387691	0.8105	6889	0.215902	pEPSC	pEPSC	pEPSC
SAMEA5337741	PRJEB31259	PAIRED	ILLUMINA	Illumina HiSeq 2000	Sus scrofa	Unknown	Landrace x Yorkshire	Cross	Male	0 day	1851448	1544933	0.8344	6625	0.207628	pEPSC	pEPSC	pEPSC
SAMEA5337742	PRJEB31259	PAIRED	ILLUMINA	Illumina HiSeq 2000	Sus scrofa	Unknown	Unknown	Unknown	Male	0 day	1784793	1415683	0.7932	5962	0.18685	pEPSC	pEPSC	pEPSC
SAMEA5337743	PRJEB31259	PAIRED	ILLUMINA	Illumina HiSeq 2000	Sus scrofa	Unknown	Landrace x Yorkshire	Cross	Male	0 day	1827649	1499208	0.8203	6612	0.207221	pEPSC	pEPSC	pEPSC
SAMEA5337744	PRJEB31259	PAIRED	ILLUMINA	Illumina HiSeq 2000	Sus scrofa	Unknown	Unknown	Unknown	Male	0 day	1707745	1404587	0.8225	5875	0.184123	pEPSC	pEPSC	pEPSC
SAMEA5337745	PRJEB31259	PAIRED	ILLUMINA	Illumina HiSeq 2000	Sus scrofa	Unknown	Unknown	Unknown	Male	0 day	628689	475952	0.7571	5206	0.163157	pEPSC	pEPSC	pEPSC
SAMEA5337746	PRJEB31259	PAIRED	ILLUMINA	Illumina HiSeq 2000	Sus scrofa	Unknown	Unknown	Unknown	Male	0 day	1173078	918812	0.7832	5582	0.17494	pEPSC	pEPSC	pEPSC
SAMEA5337747	PRJEB31259	PAIRED	ILLUMINA	Illumina HiSeq 2000	Sus scrofa	Unknown	Landrace x Yorkshire	Cross	Male	0 day	1189930	992827	0.8344	6852	0.214742	pEPSC	pEPSC	pEPSC
SAMEA5337748	PRJEB31259	PAIRED	ILLUMINA	Illumina HiSeq 2000	Sus scrofa	Unknown	Unknown	Unknown	Male	0 day	1597681	1275959	0.7986	5934	0.185972	pEPSC	pEPSC	pEPSC
SAMEA5337749	PRJEB31259	PAIRED	ILLUMINA	Illumina HiSeq 2000	Sus scrofa	Unknown	Landrace x Yorkshire	Cross	Male	0 day	1749390	1425911	0.8151	6631	0.207816	Embryo	Embryo	Embryo
SAMEA5337750	PRJEB31259	PAIRED	ILLUMINA	Illumina HiSeq 2000	Sus scrofa	Unknown	Landrace x Yorkshire	Cross	Male	0 day	1601280	1292299	0.807	6577	0.206124	pEPSC	pEPSC	pEPSC
SAMEA5337751	PRJEB31259	PAIRED	ILLUMINA	Illumina HiSeq 2000	Sus scrofa	Unknown	Unknown	Unknown	Male	0 day	329551	576	0.0017	125	0.00391751	Unknown	Unknown	Unknown
SAMEA5337752	PRJEB31259	PAIRED	ILLUMINA	Illumina HiSeq 2000	Sus scrofa	Unknown	Unknown	Unknown	Male	0 day	1663683	288012	0.1731	914	0.0286449	Unknown	Unknown	Unknown
SAMEA5337753	PRJEB31259	PAIRED	ILLUMINA	Illumina HiSeq 2000	Sus scrofa	Unknown	Unknown	Unknown	Male	0 day	1318909	402256	0.305	2007	0.0628996	Unknown	Unknown	Unknown
SAMEA5337754	PRJEB31259	PAIRED	ILLUMINA	Illumina HiSeq 2000	Sus scrofa	Unknown	Landrace x Yorkshire	Cross	Male	0 day	1339304	1098975	0.8206	6531	0.204682	pEPSC	pEPSC	pEPSC
SAMEA5337755	PRJEB31259	PAIRED	ILLUMINA	Illumina HiSeq 2000	Sus scrofa	Unknown	Landrace x Yorkshire	Cross	Male	0 day	1554089	1315308	0.8464	7272	0.227905	pEPSC	pEPSC	pEPSC
SAMEA5337756	PRJEB31259	PAIRED	ILLUMINA	Illumina HiSeq 2000	Sus scrofa	Unknown	Unknown	Unknown	Male	0 day	2065787	1736927	0.8408	6332	0.198446	pEPSC	pEPSC	pEPSC
SAMEA5928375	PRJEB31481	PAIRED	ILLUMINA	Illumina HiSeq 3000	Sus scrofa	Unknown	Unknown	Unknown	Unknown	Unknown	42684218	38096014	0.8925	14525	0.455215	Macrophage	Blood	Macrophage	Embargoed
SAMEA5928377	PRJEB31481	PAIRED	ILLUMINA	Illumina HiSeq 3000	Sus scrofa	Unknown	Unknown	Unknown	Unknown	Unknown	43492045	39563478	0.9097	14603	0.45766	Macrophage	Blood	Macrophage	Embargoed
SAMEA5928378	PRJEB31481	PAIRED	ILLUMINA	Illumina HiSeq 3000	Sus scrofa	Unknown	Unknown	Unknown	Unknown	Unknown	41812047	38878111	0.9298	14349	0.449699	Macrophage	Blood	Macrophage	Embargoed
SAMEA5928379	PRJEB31481	PAIRED	ILLUMINA	Illumina HiSeq 3000	Sus scrofa	Unknown	Unknown	Unknown	Unknown	Unknown	40687120	37426087	0.9199	14224	0.445782	Macrophage	Blood	Macrophage	Embargoed
SAMEA5928380	PRJEB31481	PAIRED	ILLUMINA	Illumina HiSeq 3000	Sus scrofa	Unknown	Unknown	Unknown	Unknown	Unknown	47385866	43376073	0.9154	14460	0.453178	Macrophage	Blood	Macrophage	Embargoed
SAMEA5928381	PRJEB31481	PAIRED	ILLUMINA	Illumina HiSeq 3000	Sus scrofa	Unknown	Unknown	Unknown	Unknown	Unknown	46082774	41335349	0.897	14970	0.469161	Macrophage	Blood	Macrophage	Embargoed
SAMEA5928383	PRJEB31481	PAIRED	ILLUMINA	Illumina HiSeq 3000	Sus scrofa	Unknown	Unknown	Unknown	Unknown	Unknown	36043020	32687604	0.9069	14078	0.441206	Macrophage	Blood	Macrophage	Embargoed
SAMEA5928384	PRJEB31481	PAIRED	ILLUMINA	Illumina HiSeq 3000	Sus scrofa	Unknown	Unknown	Unknown	Unknown	Unknown	44878857	41858559	0.9327	14643	0.458913	Macrophage	Blood	Macrophage	Embargoed
SAMEA5928385	PRJEB31481	PAIRED	ILLUMINA	Illumina HiSeq 3000	Sus scrofa	Unknown	Unknown	Unknown	Unknown	Unknown	40713588	37361795	0.9177	14443	0.452645	Macrophage	Blood	Macrophage	Embargoed
SAMEA5928386	PRJEB31481	PAIRED	ILLUMINA	Illumina HiSeq 3000	Sus scrofa	Unknown	Unknown	Unknown	Unknown	Unknown	46607846	42956635	0.9217	14475	0.453648	Macrophage	Blood	Macrophage	Embargoed
SAMEA5928387	PRJEB31481	PAIRED	ILLUMINA	Illumina HiSeq 3000	Sus scrofa	Unknown	Unknown	Unknown	Unknown	Unknown	40195246	37002880	0.9206	14347	0.449636	Macrophage	Blood	Macrophage	Embargoed
SAMEA5928389	PRJEB31481	PAIRED	ILLUMINA	Illumina HiSeq 3000	Sus scrofa	Unknown	Unknown	Unknown	Unknown	Unknown	44828782	41956703	0.9359	14274	0.447349	Macrophage	Blood	Macrophage	Embargoed
SAMEA5928390	PRJEB31481	PAIRED	ILLUMINA	Illumina HiSeq 3000	Sus scrofa	Unknown	Unknown	Unknown	Unknown	Unknown	38712447	35812113	0.9251	14539	0.455654	Macrophage	Blood	Macrophage	Embargoed
SAMEA5928391	PRJEB31481	PAIRED	ILLUMINA	Illumina HiSeq 3000	Sus scrofa	Unknown	Unknown	Unknown	Unknown	Unknown	42713753	39920052	0.9346	14403	0.451392	Macrophage	Blood	Macrophage	Embargoed
SAMEA5928392	PRJEB31481	PAIRED	ILLUMINA	Illumina HiSeq 3000	Sus scrofa	Unknown	Unknown	Unknown	Unknown	Unknown	41636581	37889489	0.91	14224	0.445782	Macrophage	Blood	Macrophage	Embargoed
SAMEA5928394	PRJEB31481	PAIRED	ILLUMINA	Illumina HiSeq 3000	Sus scrofa	Unknown	Unknown	Unknown	Unknown	Unknown	44244962	41371786	0.9351	14619	0.458161	Macrophage	Blood	Macrophage	Embargoed
SAMEA5928395	PRJEB31481	PAIRED	ILLUMINA	Illumina HiSeq 3000	Sus scrofa	Unknown	Unknown	Unknown	Unknown	Unknown	45202176	41195932	0.9114	14799	0.463802	Macrophage	Blood	Macrophage	Embargoed
SAMEA5928397	PRJEB31481	PAIRED	ILLUMINA	Illumina HiSeq 3000	Sus scrofa	Unknown	Unknown	Unknown	Unknown	Unknown	44036791	40467363	0.9189	14762	0.462643	Macrophage	Blood	Macrophage	Embargoed
SAMEA5928398	PRJEB31481	PAIRED	ILLUMINA	Illumina HiSeq 3000	Sus scrofa	Unknown	Unknown	Unknown	Unknown	Unknown	37664250	35448295	0.9412	14511	0.454776	Macrophage	Blood	Macrophage	Embargoed
SAMEA5928399	PRJEB31481	PAIRED	ILLUMINA	Illumina HiSeq 3000	Sus scrofa	Unknown	Unknown	Unknown	Unknown	Unknown	38013954	34260013	0.9012	14502	0.454494	Macrophage	Blood	Macrophage	Embargoed
SAMEA5928400	PRJEB31481	PAIRED	ILLUMINA	Illumina HiSeq 3000	Sus scrofa	Unknown	Unknown	Unknown	Unknown	Unknown	45925854	41292585	0.8991	14704	0.460825	Macrophage	Blood	Macrophage	Embargoed
SAMEA5928401	PRJEB31481	PAIRED	ILLUMINA	Illumina HiSeq 3000	Sus scrofa	Unknown	Unknown	Unknown	Unknown	Unknown	42811602	38753583	0.9052	14179	0.444371	Macrophage	Blood	Macrophage	Embargoed
SAMEA5928402	PRJEB31481	PAIRED	ILLUMINA	Illumina HiSeq 3000	Sus scrofa	Unknown	Unknown	Unknown	Unknown	Unknown	41297899	37731799	0.9136	14437	0.452457	Macrophage	Blood	Macrophage	Embargoed
SAMEA5928404	PRJEB31481	PAIRED	ILLUMINA	Illumina HiSeq 3000	Sus scrofa	Unknown	Unknown	Unknown	Unknown	Unknown	35967512	32973682	0.9168	14428	0.452175	Macrophage	Blood	Macrophage	Embargoed
SAMEA1487398	PRJEB3197	PAIRED	ILLUMINA	Illumina Genome Analyzer II	Sus scrofa	Unknown	Unknown	Unknown	Female	Unknown	0	0	0	0	0	Unknown	Unknown	Unknown
SAMEA1487410	PRJEB3197	PAIRED	ILLUMINA	Illumina Genome Analyzer II	Sus scrofa domesticus	Unknown	Unknown	Unknown	Female	Unknown	0	0	0	0	0	Unknown	Unknown	Unknown
SAMEA1487420	PRJEB3197	PAIRED	ILLUMINA	Illumina Genome Analyzer II	Sus scrofa domesticus	Unknown	Landrace x Yorkshire	Cross	Female	Unknown	18201194	15935163	0.8755	18503	0.579886	Frontal cortex	Brain	Frontal cortex
SAMEA1487433	PRJEB3197	PAIRED	ILLUMINA	Illumina Genome Analyzer II	Sus scrofa	Unknown	Unknown	Unknown	Female	Unknown	0	0	0	0	0	Unknown	Unknown	Unknown
SAMEA1487441	PRJEB3197	PAIRED	ILLUMINA	Illumina Genome Analyzer II	Sus scrofa domesticus	Unknown	Unknown	Unknown	Female	Unknown	0	0	0	0	0	Unknown	Unknown	Unknown
SAMEA1487444	PRJEB3197	PAIRED	ILLUMINA	Illumina Genome Analyzer II	Sus scrofa	Unknown	Unknown	Unknown	Female	Unknown	0	0	0	0	0	Unknown	Unknown	Unknown
SAMEA1487446	PRJEB3197	PAIRED	ILLUMINA	Illumina Genome Analyzer II	Sus scrofa domesticus	Unknown	Unknown	Unknown	Female	Unknown	0	0	0	0	0	Unknown	Unknown	Unknown
SAMEA1487448	PRJEB3197	PAIRED	ILLUMINA	Illumina Genome Analyzer II	Sus scrofa	Unknown	Unknown	Unknown	Female	Unknown	0	0	0	0	0	Unknown	Unknown	Unknown
SAMEA1487449	PRJEB3197	PAIRED	ILLUMINA	Illumina Genome Analyzer II	Sus scrofa	Unknown	Unknown	Unknown	Female	Unknown	0	0	0	0	0	Unknown	Unknown	Unknown
SAMEA1487451	PRJEB3197	PAIRED	ILLUMINA	Illumina Genome Analyzer II	Sus scrofa domesticus	Unknown	Unknown	Unknown	Female	Unknown	0	0	0	0	0	Unknown	Unknown	Unknown
SAMEA1876824	PRJEB3197	PAIRED	ILLUMINA	Illumina Genome Analyzer II	Sus scrofa domesticus	Unknown	Landrace x Yorkshire	Cross	Female	Unknown	27416593	21030448	0.7671	19506	0.61132	Frontal cortex	Brain	Frontal cortex
SAMEA1876826	PRJEB3197	PAIRED	ILLUMINA	Illumina Genome Analyzer II	Sus scrofa domesticus	Unknown	Landrace x Yorkshire	Cross	Female	Unknown	19797425	15529892	0.7844	18475	0.579008	Frontal cortex	Brain	Frontal cortex
SAMEA1876828	PRJEB3197	PAIRED	ILLUMINA	Illumina Genome Analyzer II	Sus scrofa	Unknown	Landrace x Yorkshire	Cross	Female	Unknown	26510110	20411685	0.77	18135	0.568353	Frontal cortex	Brain	Frontal cortex
SAMEA1876835	PRJEB3197	PAIRED	ILLUMINA	Illumina Genome Analyzer II	Sus scrofa domesticus	Unknown	Landrace x Yorkshire	Cross	Female	Unknown	18201194	15935163	0.8755	18503	0.579886	Frontal cortex	Brain	Frontal cortex
SAMEA1876838	PRJEB3197	PAIRED	ILLUMINA	Illumina Genome Analyzer II	Sus scrofa domesticus	Unknown	Landrace x Yorkshire	Cross	Female	Unknown	19788821	17111959	0.8647	18316	0.574025	Frontal cortex	Brain	Frontal cortex
SAMEA1876846	PRJEB3197	PAIRED	ILLUMINA	Illumina Genome Analyzer II	Sus scrofa	Unknown	Landrace x Yorkshire	Cross	Female	Unknown	15644972	14211277	0.9084	16926	0.530463	Frontal cortex	Brain	Frontal cortex
SAMEA1876852	PRJEB3197	PAIRED	ILLUMINA	Illumina Genome Analyzer II	Sus scrofa	Unknown	Landrace x Yorkshire	Cross	Female	Unknown	16613052	14786121	0.89	16620	0.520873	Frontal cortex	Brain	Frontal cortex
SAMEA1876863	PRJEB3197	PAIRED	ILLUMINA	Illumina Genome Analyzer II	Sus scrofa domesticus	Unknown	Landrace x Yorkshire	Cross	Female	Unknown	19766135	16781796	0.849	18473	0.578946	Frontal cortex	Brain	Frontal cortex
SAMEA1876892	PRJEB3197	PAIRED	ILLUMINA	Illumina Genome Analyzer II	Sus scrofa	Unknown	Landrace x Yorkshire	Cross	Female	Unknown	14587644	12536002	0.8594	16613	0.520653	Frontal cortex	Brain	Frontal cortex
SAMEA1876894	PRJEB3197	PAIRED	ILLUMINA	Illumina Genome Analyzer II	Sus scrofa	Unknown	Landrace x Yorkshire	Cross	Female	Unknown	17282338	15023950	0.8693	17109	0.536198	Frontal cortex	Brain	Frontal cortex
SAMEA5663133	PRJEB32771	PAIRED	ILLUMINA	Illumina HiSeq 2000	Sus scrofa domesticus	Unknown	Unknown	Unknown	Female	9 weeks	26488022	24281783	0.9167	16063	0.503416	Adrenal gland	Other	Other	Outlier
SAMEA5663134	PRJEB32771	PAIRED	ILLUMINA	Illumina HiSeq 2000	Sus scrofa domesticus	Unknown	Unknown	Unknown	Female	9 weeks	33050358	31049443	0.9395	16626	0.521061	Adrenal gland	Other	Other	Outlier
SAMEA5663135	PRJEB32771	PAIRED	ILLUMINA	Illumina HiSeq 2000	Sus scrofa domesticus	Unknown	Unknown	Unknown	Female	9 weeks	28665238	26614295	0.9285	16499	0.51708	Adrenal gland	Other	Other	Outlier
SAMEA5663136	PRJEB32771	PAIRED	ILLUMINA	Illumina HiSeq 2000	Sus scrofa domesticus	Unknown	Unknown	Unknown	Female	9 weeks	30341765	27818204	0.9168	16517	0.517644	Adrenal gland	Other	Other	Outlier
SAMEA5663137	PRJEB32771	PAIRED	ILLUMINA	Illumina HiSeq 2000	Sus scrofa domesticus	Unknown	Unknown	Unknown	Female	9 weeks	33582520	31074795	0.9253	16026	0.502256	Adrenal gland	Other	Other	Outlier
SAMEA5663138	PRJEB32771	PAIRED	ILLUMINA	Illumina HiSeq 2000	Sus scrofa domesticus	Unknown	Unknown	Unknown	Female	9 weeks	30002885	27408467	0.9135	16843	0.527861	Adrenal gland	Other	Other	Outlier
SAMEA5663139	PRJEB32771	PAIRED	ILLUMINA	Illumina HiSeq 2000	Sus scrofa domesticus	Unknown	Unknown	Unknown	Female	9 weeks	34870733	30133518	0.8641	16426	0.514793	Adrenal gland	Other	Other	Outlier
SAMEA5663140	PRJEB32771	PAIRED	ILLUMINA	Illumina HiSeq 2000	Sus scrofa domesticus	Unknown	Unknown	Unknown	Female	9 weeks	34770290	32260829	0.9278	16515	0.517582	Adrenal gland	Other	Other	Outlier
SAMEA5756299	PRJEB33353	PAIRED	ILLUMINA	Illumina NovaSeq 6000	Sus scrofa	Unknown	Unknown	Unknown	Male	2 years	230940562	117156553	0.5073	17074	0.535101	Unknown	Unknown	Unknown
SAMEA5756310	PRJEB33353	PAIRED	ILLUMINA	Illumina NovaSeq 6000	Sus scrofa	Unknown	Unknown	Unknown	Male	2 years	12014006	5549668	0.4619	6338	0.198634	Unknown	Unknown	Unknown
SAMEA5756312	PRJEB33353	PAIRED	ILLUMINA	Illumina NovaSeq 6000	Sus scrofa	Unknown	Tibetan	Asian pigs	Male	2 years	15177872	10886736	0.7173	13753	0.43102	Muscle	Muscle	Muscle
SAMEA5760387	PRJEB33381	PAIRED	ILLUMINA	Illumina NovaSeq 6000	Sus scrofa	Unknown	Chinese Wuzhishan	Asian pigs	Male	2 years	104914037	76834335	0.7324	23974	0.751348	Testis	Testis	Testis
SAMEA5760399	PRJEB33381	PAIRED	ILLUMINA	Illumina NovaSeq 6000	Sus scrofa	Unknown	Chinese Wuzhishan	Asian pigs	Male	2 years	82970105	60787895	0.7326	21659	0.678795	Brain	Brain	Brain
SAMEA5760401	PRJEB33381	PAIRED	ILLUMINA	Illumina NovaSeq 6000	Sus scrofa	Unknown	Chinese Wuzhishan	Asian pigs	Male	2 years	45302062	36571656	0.8073	19240	0.602984	Liver	Liver	Liver
SAMEA5760407	PRJEB33381	PAIRED	ILLUMINA	Illumina NovaSeq 6000	Sus scrofa	Unknown	Chinese Wuzhishan	Asian pigs	Male	2 years	56129943	45998103	0.8195	19837	0.621694	Liver	Liver	Liver
SAMEA5760419	PRJEB33381	PAIRED	ILLUMINA	Illumina NovaSeq 6000	Sus scrofa	Unknown	Chinese Wuzhishan	Asian pigs	Male	2 years	39416490	33871000	0.8593	17137	0.537075	Muscle	Muscle	Muscle
SAMEA5760421	PRJEB33381	PAIRED	ILLUMINA	Illumina NovaSeq 6000	Sus scrofa	Unknown	Chinese Wuzhishan	Asian pigs	Male	2 years	53558557	40223094	0.751	19577	0.613545	Liver	Liver	Liver
SAMEA5760436	PRJEB33381	PAIRED	ILLUMINA	Illumina NovaSeq 6000	Sus scrofa	Unknown	Chinese Wuzhishan	Asian pigs	Male	2 years	106395911	83045064	0.7805	25729	0.80635	Testis	Testis	Testis
SAMEA5760449	PRJEB33381	PAIRED	ILLUMINA	Illumina NovaSeq 6000	Sus scrofa	Unknown	Chinese Wuzhishan	Asian pigs	Male	2 years	72936610	61914475	0.8489	18179	0.569732	Muscle	Muscle	Muscle
SAMEA5760477	PRJEB33381	PAIRED	ILLUMINA	Illumina NovaSeq 6000	Sus scrofa	Unknown	Chinese Wuzhishan	Asian pigs	Male	2 years	69929075	60453930	0.8645	18153	0.568917	Muscle	Muscle	Muscle
SAMEA5760496	PRJEB33381	PAIRED	ILLUMINA	Illumina NovaSeq 6000	Sus scrofa	Unknown	Chinese Wuzhishan	Asian pigs	Male	2 years	125968745	98574466	0.7825	26047	0.816316	Testis	Testis	Testis
SAMEA5760498	PRJEB33381	PAIRED	ILLUMINA	Illumina NovaSeq 6000	Sus scrofa	Unknown	Chinese Wuzhishan	Asian pigs	Male	2 years	151488120	93172145	0.615	18722	0.586749	Brain	Brain	Brain
SAMEA5760502	PRJEB33381	PAIRED	ILLUMINA	Illumina NovaSeq 6000	Sus scrofa	Unknown	Unknown	Unknown	Male	2 years	209730765	100820776	0.4807	13751	0.430958	Unknown	Unknown	Unknown
SAMEA6428020	PRJEB35892	PAIRED	ILLUMINA	Illumina NovaSeq 6000	Sus scrofa domesticus	Unknown	Landrace x Yorkshire	Cross	Female	Unknown	53705667	51770501	0.964	15877	0.497587	Corpus luteum	Ovary	Ovary
SAMEA6428021	PRJEB35892	PAIRED	ILLUMINA	Illumina NovaSeq 6000	Sus scrofa domesticus	Unknown	Landrace x Yorkshire	Cross	Female	Unknown	61177412	58408882	0.9547	15843	0.496521	Corpus luteum	Ovary	Ovary
SAMEA6428022	PRJEB35892	PAIRED	ILLUMINA	Illumina NovaSeq 6000	Sus scrofa domesticus	Unknown	Landrace x Yorkshire	Cross	Female	Unknown	58891965	56448656	0.9585	15934	0.499373	Corpus luteum	Ovary	Ovary
SAMEA6428023	PRJEB35892	PAIRED	ILLUMINA	Illumina NovaSeq 6000	Sus scrofa domesticus	Unknown	Landrace x Yorkshire	Cross	Female	Unknown	56386168	54080358	0.9591	15905	0.498464	Corpus luteum	Ovary	Ovary
SAMEA6428024	PRJEB35892	PAIRED	ILLUMINA	Illumina NovaSeq 6000	Sus scrofa domesticus	Unknown	Landrace x Yorkshire	Cross	Female	Unknown	52765772	50621652	0.9594	15782	0.49461	Corpus luteum	Ovary	Ovary
SAMEA6428025	PRJEB35892	PAIRED	ILLUMINA	Illumina NovaSeq 6000	Sus scrofa domesticus	Unknown	Landrace x Yorkshire	Cross	Female	Unknown	53349594	51051127	0.9569	15826	0.495988	Corpus luteum	Ovary	Ovary
SAMEA6428026	PRJEB35892	PAIRED	ILLUMINA	Illumina NovaSeq 6000	Sus scrofa domesticus	Unknown	Landrace x Yorkshire	Cross	Female	Unknown	56469199	54339730	0.9623	15812	0.49555	Corpus luteum	Ovary	Ovary
SAMEA6428027	PRJEB35892	PAIRED	ILLUMINA	Illumina NovaSeq 6000	Sus scrofa domesticus	Unknown	Landrace x Yorkshire	Cross	Female	Unknown	54925739	52487024	0.9556	15745	0.49345	Corpus luteum	Ovary	Ovary
SAMEA6428028	PRJEB35892	PAIRED	ILLUMINA	Illumina NovaSeq 6000	Sus scrofa domesticus	Unknown	Landrace x Yorkshire	Cross	Female	Unknown	59764343	57051460	0.9546	15843	0.496521	Corpus luteum	Ovary	Ovary
SAMEA6428029	PRJEB35892	PAIRED	ILLUMINA	Illumina NovaSeq 6000	Sus scrofa domesticus	Unknown	Landrace x Yorkshire	Cross	Female	Unknown	54981272	52648761	0.9576	15785	0.494704	Corpus luteum	Ovary	Ovary
SAMEA6638616	PRJEB37538	PAIRED	ILLUMINA	Illumina HiSeq 4000	Sus scrofa domesticus	Duroc	Duroc x Pietrain	Cross	Female	9 weeks	47179867	42200987	0.8945	17716	0.555221	Uterus	Uterus	Uterus
SAMEA6638617	PRJEB37538	PAIRED	ILLUMINA	Illumina HiSeq 4000	Sus scrofa domesticus	Duroc	Duroc x Pietrain	Cross	Female	9 weeks	43881544	37001007	0.8432	17581	0.55099	Uterus	Uterus	Uterus
SAMEA6638618	PRJEB37538	PAIRED	ILLUMINA	Illumina HiSeq 4000	Sus scrofa domesticus	Duroc	Duroc x Pietrain	Cross	Female	9 weeks	46115735	38556817	0.8361	19005	0.595619	Uterus	Uterus	Uterus
SAMEA6638619	PRJEB37538	PAIRED	ILLUMINA	Illumina HiSeq 4000	Sus scrofa domesticus	Duroc	Duroc x Pietrain	Cross	Female	9 weeks	52003754	46868604	0.9013	17154	0.537608	Uterus	Uterus	Uterus
SAMEA6638620	PRJEB37538	PAIRED	ILLUMINA	Illumina HiSeq 4000	Sus scrofa domesticus	Duroc	Landrace x Yorkshire	Cross	Female	9 weeks	43449733	31780535	0.7314	16962	0.531591	Uterus	Uterus	Uterus
SAMEA6638621	PRJEB37538	PAIRED	ILLUMINA	Illumina HiSeq 4000	Sus scrofa domesticus	Duroc	Duroc x Pietrain	Cross	Female	9 weeks	40923001	30845333	0.7537	16780	0.525887	Uterus	Uterus	Uterus
SAMEA6798325	PRJEB37564	SINGLE	ILLUMINA	Illumina HiSeq 2500	Sus scrofa domesticus	Unknown	Yorkshire	European pigs	Unknown	Unknown	30924382	29810657	0.964	14571	0.456657	Blood	Blood	Blood
SAMEA6798326	PRJEB37564	SINGLE	ILLUMINA	Illumina HiSeq 2500	Sus scrofa domesticus	Unknown	Yorkshire	European pigs	Unknown	Unknown	28650521	27328064	0.9538	15147	0.474709	Blood	Blood	Blood
SAMEA6798327	PRJEB37564	SINGLE	ILLUMINA	Illumina HiSeq 2500	Sus scrofa domesticus	Unknown	Yorkshire	European pigs	Unknown	Unknown	30828070	29387456	0.9533	14965	0.469005	Blood	Blood	Blood
SAMEA6798328	PRJEB37564	SINGLE	ILLUMINA	Illumina HiSeq 2500	Sus scrofa domesticus	Unknown	Yorkshire	European pigs	Unknown	Unknown	28987964	27643252	0.9536	14882	0.466403	Blood	Blood	Blood
SAMEA6798329	PRJEB37564	SINGLE	ILLUMINA	Illumina HiSeq 2500	Sus scrofa domesticus	Unknown	Yorkshire	European pigs	Unknown	Unknown	30617896	29384395	0.9597	13443	0.421305	Blood	Blood	Blood
SAMEA6798330	PRJEB37564	SINGLE	ILLUMINA	Illumina HiSeq 2500	Sus scrofa domesticus	Unknown	Yorkshire	European pigs	Unknown	Unknown	27516729	26380316	0.9587	13237	0.414849	Blood	Blood	Blood
SAMEA6798331	PRJEB37564	SINGLE	ILLUMINA	Illumina HiSeq 2500	Sus scrofa domesticus	Unknown	Yorkshire	European pigs	Unknown	Unknown	26160894	25082356	0.9588	13477	0.422371	Blood	Blood	Blood
SAMEA6798332	PRJEB37564	SINGLE	ILLUMINA	Illumina HiSeq 2500	Sus scrofa domesticus	Unknown	Yorkshire	European pigs	Unknown	Unknown	27119465	25885215	0.9545	13332	0.417826	Blood	Blood	Blood
SAMEA6798333	PRJEB37564	SINGLE	ILLUMINA	Illumina HiSeq 2500	Sus scrofa domesticus	Unknown	Yorkshire	European pigs	Unknown	Unknown	27223642	26280930	0.9654	14388	0.450921	Blood	Blood	Blood
SAMEA6798334	PRJEB37564	SINGLE	ILLUMINA	Illumina HiSeq 2500	Sus scrofa domesticus	Unknown	Yorkshire	European pigs	Unknown	Unknown	28345846	27353404	0.965	14186	0.444591	Blood	Blood	Blood
SAMEA6798335	PRJEB37564	SINGLE	ILLUMINA	Illumina HiSeq 2500	Sus scrofa domesticus	Unknown	Yorkshire	European pigs	Unknown	Unknown	33097150	31997657	0.9668	14107	0.442115	Blood	Blood	Blood
SAMEA6798336	PRJEB37564	SINGLE	ILLUMINA	Illumina HiSeq 2500	Sus scrofa domesticus	Unknown	Yorkshire	European pigs	Unknown	Unknown	26709126	25731024	0.9634	13863	0.434468	Blood	Blood	Blood
SAMEA6798337	PRJEB37564	SINGLE	ILLUMINA	Illumina HiSeq 2500	Sus scrofa domesticus	Unknown	Yorkshire	European pigs	Unknown	Unknown	31052890	30058381	0.968	13556	0.424846	Blood	Blood	Blood
SAMEA6798338	PRJEB37564	SINGLE	ILLUMINA	Illumina HiSeq 2500	Sus scrofa domesticus	Unknown	Yorkshire	European pigs	Unknown	Unknown	27602276	26610494	0.9641	13399	0.419926	Blood	Blood	Blood
SAMEA6798339	PRJEB37564	SINGLE	ILLUMINA	Illumina HiSeq 2500	Sus scrofa domesticus	Unknown	Yorkshire	European pigs	Unknown	Unknown	26059389	25191818	0.9667	13858	0.434311	Blood	Blood	Blood
SAMEA6798340	PRJEB37564	SINGLE	ILLUMINA	Illumina HiSeq 2500	Sus scrofa domesticus	Unknown	Yorkshire	European pigs	Unknown	Unknown	29366958	28396747	0.967	15375	0.481854	Blood	Blood	Blood
SAMEA6798341	PRJEB37564	SINGLE	ILLUMINA	Illumina HiSeq 2500	Sus scrofa domesticus	Unknown	Yorkshire	European pigs	Unknown	Unknown	29194995	28191726	0.9656	15413	0.483045	Blood	Blood	Blood
SAMEA6798342	PRJEB37564	SINGLE	ILLUMINA	Illumina HiSeq 2500	Sus scrofa domesticus	Unknown	Yorkshire	European pigs	Unknown	Unknown	31376955	30228737	0.9634	15268	0.478501	Blood	Blood	Blood
SAMEA6798343	PRJEB37564	SINGLE	ILLUMINA	Illumina HiSeq 2500	Sus scrofa domesticus	Unknown	Yorkshire	European pigs	Unknown	Unknown	29691187	28687361	0.9662	15263	0.478344	Blood	Blood	Blood
SAMEA6798344	PRJEB37564	SINGLE	ILLUMINA	Illumina HiSeq 2500	Sus scrofa domesticus	Unknown	Yorkshire	European pigs	Unknown	Unknown	26693382	25768164	0.9653	14876	0.466215	Blood	Blood	Blood
SAMEA6798345	PRJEB37564	SINGLE	ILLUMINA	Illumina HiSeq 2500	Sus scrofa domesticus	Unknown	Yorkshire	European pigs	Unknown	Unknown	29014773	27901044	0.9616	15119	0.473831	Blood	Blood	Blood
SAMEA6798346	PRJEB37564	SINGLE	ILLUMINA	Illumina HiSeq 2500	Sus scrofa domesticus	Unknown	Yorkshire	European pigs	Unknown	Unknown	31957106	30922749	0.9676	13341	0.418108	Blood	Blood	Blood
SAMEA6798347	PRJEB37564	SINGLE	ILLUMINA	Illumina HiSeq 2500	Sus scrofa domesticus	Unknown	Yorkshire	European pigs	Unknown	Unknown	25914734	25006350	0.9649	13985	0.438291	Blood	Blood	Blood
SAMEA6798348	PRJEB37564	SINGLE	ILLUMINA	Illumina HiSeq 2500	Sus scrofa domesticus	Unknown	Yorkshire	European pigs	Unknown	Unknown	26596518	25739755	0.9678	13197	0.413595	Blood	Blood	Blood
SAMEA6798349	PRJEB37564	SINGLE	ILLUMINA	Illumina HiSeq 2500	Sus scrofa domesticus	Unknown	Yorkshire	European pigs	Unknown	Unknown	29386536	28374916	0.9656	13265	0.415726	Blood	Blood	Blood
SAMEA6798350	PRJEB37564	SINGLE	ILLUMINA	Illumina HiSeq 2500	Sus scrofa domesticus	Unknown	Yorkshire	European pigs	Unknown	Unknown	32482808	31327559	0.9644	13318	0.417387	Blood	Blood	Blood
SAMEA6798351	PRJEB37564	SINGLE	ILLUMINA	Illumina HiSeq 2500	Sus scrofa domesticus	Unknown	Yorkshire	European pigs	Unknown	Unknown	22620286	21797681	0.9636	14057	0.440548	Blood	Blood	Blood
SAMEA6798352	PRJEB37564	SINGLE	ILLUMINA	Illumina HiSeq 2500	Sus scrofa domesticus	Unknown	Yorkshire	European pigs	Unknown	Unknown	26505017	25586523	0.9653	13804	0.432619	Blood	Blood	Blood
SAMEA6798353	PRJEB37564	SINGLE	ILLUMINA	Illumina HiSeq 2500	Sus scrofa domesticus	Unknown	Yorkshire	European pigs	Unknown	Unknown	27665140	26746389	0.9668	14065	0.440799	Blood	Blood	Blood
SAMEA6798354	PRJEB37564	SINGLE	ILLUMINA	Illumina HiSeq 2500	Sus scrofa domesticus	Unknown	Yorkshire	European pigs	Unknown	Unknown	25364950	24519335	0.9667	13582	0.425661	Blood	Blood	Blood
SAMEA6798355	PRJEB37564	SINGLE	ILLUMINA	Illumina HiSeq 2500	Sus scrofa domesticus	Unknown	Yorkshire	European pigs	Unknown	Unknown	27347132	26255748	0.9601	13419	0.420553	Blood	Blood	Blood
SAMEA6798356	PRJEB37564	SINGLE	ILLUMINA	Illumina HiSeq 2500	Sus scrofa domesticus	Unknown	Yorkshire	European pigs	Unknown	Unknown	25900990	24964193	0.9638	13848	0.433998	Blood	Blood	Blood
SAMEA6798357	PRJEB37564	SINGLE	ILLUMINA	Illumina HiSeq 2500	Sus scrofa domesticus	Unknown	Yorkshire	European pigs	Unknown	Unknown	25481899	24761917	0.9717	15017	0.470634	Blood	Blood	Blood
SAMEA6798358	PRJEB37564	SINGLE	ILLUMINA	Illumina HiSeq 2500	Sus scrofa domesticus	Unknown	Yorkshire	European pigs	Unknown	Unknown	29560151	28563546	0.9663	13626	0.42704	Blood	Blood	Blood
SAMEA6798359	PRJEB37564	SINGLE	ILLUMINA	Illumina HiSeq 2500	Sus scrofa domesticus	Unknown	Yorkshire	European pigs	Unknown	Unknown	28224383	27420513	0.9715	15122	0.473925	Blood	Blood	Blood
SAMEA6798360	PRJEB37564	SINGLE	ILLUMINA	Illumina HiSeq 2500	Sus scrofa domesticus	Unknown	Yorkshire	European pigs	Unknown	Unknown	24014076	23213739	0.9667	14864	0.465839	Blood	Blood	Blood
SAMEA6798361	PRJEB37564	SINGLE	ILLUMINA	Illumina HiSeq 2500	Sus scrofa domesticus	Unknown	Yorkshire	European pigs	Unknown	Unknown	27066657	26234779	0.9693	14717	0.461232	Blood	Blood	Blood
SAMEA6798362	PRJEB37564	SINGLE	ILLUMINA	Illumina HiSeq 2500	Sus scrofa domesticus	Unknown	Yorkshire	European pigs	Unknown	Unknown	29760487	28838726	0.969	14506	0.45462	Blood	Blood	Blood
SAMEA6798363	PRJEB37564	SINGLE	ILLUMINA	Illumina HiSeq 2500	Sus scrofa domesticus	Unknown	Yorkshire	European pigs	Unknown	Unknown	25966832	24850015	0.957	14295	0.448007	Blood	Blood	Blood
SAMEA6798364	PRJEB37564	SINGLE	ILLUMINA	Illumina HiSeq 2500	Sus scrofa domesticus	Unknown	Yorkshire	European pigs	Unknown	Unknown	28028565	26980509	0.9626	13045	0.408832	Blood	Blood	Blood
SAMEA6798365	PRJEB37564	SINGLE	ILLUMINA	Illumina HiSeq 2500	Sus scrofa domesticus	Unknown	Yorkshire	European pigs	Unknown	Unknown	22630512	21736621	0.9605	12656	0.39664	Blood	Blood	Blood
SAMEA6798366	PRJEB37564	SINGLE	ILLUMINA	Illumina HiSeq 2500	Sus scrofa domesticus	Unknown	Yorkshire	European pigs	Unknown	Unknown	27859598	26696504	0.9583	13142	0.411872	Blood	Blood	Blood
SAMEA6798367	PRJEB37564	SINGLE	ILLUMINA	Illumina HiSeq 2500	Sus scrofa domesticus	Unknown	Yorkshire	European pigs	Unknown	Unknown	26115349	25071359	0.96	12870	0.403347	Blood	Blood	Blood
SAMEA6798368	PRJEB37564	SINGLE	ILLUMINA	Illumina HiSeq 2500	Sus scrofa domesticus	Unknown	Yorkshire	European pigs	Unknown	Unknown	29801426	28663924	0.9618	13518	0.423656	Blood	Blood	Blood
SAMEA6798369	PRJEB37564	SINGLE	ILLUMINA	Illumina HiSeq 2500	Sus scrofa domesticus	Unknown	Yorkshire	European pigs	Unknown	Unknown	25722109	24806353	0.9644	13940	0.436881	Blood	Blood	Blood
SAMEA6798370	PRJEB37564	SINGLE	ILLUMINA	Illumina HiSeq 2500	Sus scrofa domesticus	Unknown	Yorkshire	European pigs	Unknown	Unknown	28482935	27259709	0.9571	15085	0.472765	Blood	Blood	Blood
SAMEA6798371	PRJEB37564	SINGLE	ILLUMINA	Illumina HiSeq 2500	Sus scrofa domesticus	Unknown	Yorkshire	European pigs	Unknown	Unknown	30032580	28735613	0.9568	15051	0.4717	Blood	Blood	Blood
SAMEA6798372	PRJEB37564	SINGLE	ILLUMINA	Illumina HiSeq 2500	Sus scrofa domesticus	Unknown	Yorkshire	European pigs	Unknown	Unknown	19044462	18058076	0.9482	14532	0.455434	Blood	Blood	Blood
SAMEA6809295	PRJEB37565	PAIRED	ILLUMINA	Illumina HiSeq 3000	Sus scrofa domesticus	Unknown	Yorkshire	European pigs	Unknown	Unknown	19788096	18561489	0.938	14909	0.46725	Lymph node	Lymph node	Lymph node
SAMEA6809296	PRJEB37565	PAIRED	ILLUMINA	Illumina HiSeq 3000	Sus scrofa domesticus	Unknown	Yorkshire	European pigs	Unknown	Unknown	27741329	26078814	0.9401	14258	0.446847	Lymph node	Lymph node	Lymph node
SAMEA6809297	PRJEB37565	PAIRED	ILLUMINA	Illumina HiSeq 3000	Sus scrofa domesticus	Unknown	Yorkshire	European pigs	Unknown	Unknown	22505355	20888793	0.9282	14219	0.445625	Lymph node	Lymph node	Lymph node
SAMEA6809298	PRJEB37565	PAIRED	ILLUMINA	Illumina HiSeq 3000	Sus scrofa domesticus	Unknown	Yorkshire	European pigs	Unknown	Unknown	24680302	22881942	0.9271	12809	0.401435	Lymph node	Lymph node	Lymph node
SAMEA6809299	PRJEB37565	PAIRED	ILLUMINA	Illumina HiSeq 3000	Sus scrofa domesticus	Unknown	Yorkshire	European pigs	Unknown	Unknown	31834986	30304704	0.9519	15920	0.498934	Lymph node	Lymph node	Lymph node
SAMEA6809300	PRJEB37565	PAIRED	ILLUMINA	Illumina HiSeq 3000	Sus scrofa domesticus	Unknown	Yorkshire	European pigs	Unknown	Unknown	29352529	27814637	0.9476	15247	0.477843	Lymph node	Lymph node	Lymph node
SAMEA6809301	PRJEB37565	PAIRED	ILLUMINA	Illumina HiSeq 3000	Sus scrofa domesticus	Unknown	Yorkshire	European pigs	Unknown	Unknown	27783176	26301292	0.9467	14626	0.45838	Lymph node	Lymph node	Lymph node
SAMEA6809302	PRJEB37565	PAIRED	ILLUMINA	Illumina HiSeq 3000	Sus scrofa domesticus	Unknown	Yorkshire	European pigs	Unknown	Unknown	30945438	29718542	0.9604	15069	0.472264	Lymph node	Lymph node	Lymph node
SAMEA6809303	PRJEB37565	PAIRED	ILLUMINA	Illumina HiSeq 3000	Sus scrofa domesticus	Unknown	Yorkshire	European pigs	Unknown	Unknown	27889111	26446306	0.9483	16350	0.512411	Lymph node	Lymph node	Lymph node
SAMEA6809304	PRJEB37565	PAIRED	ILLUMINA	Illumina HiSeq 3000	Sus scrofa domesticus	Unknown	Yorkshire	European pigs	Unknown	Unknown	28564110	26973363	0.9443	15983	0.500909	Lymph node	Lymph node	Lymph node
SAMEA6809305	PRJEB37565	PAIRED	ILLUMINA	Illumina HiSeq 3000	Sus scrofa domesticus	Unknown	Yorkshire	European pigs	Unknown	Unknown	28267567	26632447	0.9422	15649	0.490441	Lymph node	Lymph node	Lymph node
SAMEA6809306	PRJEB37565	PAIRED	ILLUMINA	Illumina HiSeq 3000	Sus scrofa domesticus	Unknown	Yorkshire	European pigs	Unknown	Unknown	30196196	28931091	0.9581	15245	0.47778	Lymph node	Lymph node	Lymph node
SAMEA6809307	PRJEB37565	PAIRED	ILLUMINA	Illumina HiSeq 3000	Sus scrofa domesticus	Unknown	Yorkshire	European pigs	Unknown	Unknown	29668727	27609479	0.9306	14100	0.441895	Lymph node	Lymph node	Lymph node
SAMEA6809308	PRJEB37565	PAIRED	ILLUMINA	Illumina HiSeq 3000	Sus scrofa domesticus	Unknown	Yorkshire	European pigs	Unknown	Unknown	30008132	27765535	0.9253	15424	0.48339	Lymph node	Lymph node	Lymph node
SAMEA6809309	PRJEB37565	PAIRED	ILLUMINA	Illumina HiSeq 3000	Sus scrofa domesticus	Unknown	Yorkshire	European pigs	Unknown	Unknown	28931825	27006249	0.9334	15358	0.481321	Lymph node	Lymph node	Lymph node
SAMEA6809310	PRJEB37565	PAIRED	ILLUMINA	Illumina HiSeq 3000	Sus scrofa domesticus	Unknown	Yorkshire	European pigs	Unknown	Unknown	28958427	27598969	0.9531	15544	0.487151	Lymph node	Lymph node	Lymph node
SAMEA6809311	PRJEB37565	PAIRED	ILLUMINA	Illumina HiSeq 3000	Sus scrofa domesticus	Unknown	Yorkshire	European pigs	Unknown	Unknown	21320389	19990449	0.9376	13114	0.410994	Lymph node	Lymph node	Lymph node
SAMEA6809312	PRJEB37565	PAIRED	ILLUMINA	Illumina HiSeq 3000	Sus scrofa domesticus	Unknown	Yorkshire	European pigs	Unknown	Unknown	24978653	23467723	0.9395	14439	0.45252	Lymph node	Lymph node	Lymph node
SAMEA6809313	PRJEB37565	PAIRED	ILLUMINA	Illumina HiSeq 3000	Sus scrofa domesticus	Unknown	Yorkshire	European pigs	Unknown	Unknown	18201736	15866019	0.8717	14728	0.461577	Lymph node	Lymph node	Lymph node
SAMEA6809314	PRJEB37565	PAIRED	ILLUMINA	Illumina HiSeq 3000	Sus scrofa domesticus	Unknown	Yorkshire	European pigs	Unknown	Unknown	26138170	24963713	0.9551	14717	0.461232	Lymph node	Lymph node	Lymph node
SAMEA6809315	PRJEB37565	PAIRED	ILLUMINA	Illumina HiSeq 3000	Sus scrofa domesticus	Unknown	Yorkshire	European pigs	Unknown	Unknown	27061285	25499105	0.9423	13749	0.430895	Lymph node	Lymph node	Lymph node
SAMEA6809316	PRJEB37565	PAIRED	ILLUMINA	Illumina HiSeq 3000	Sus scrofa domesticus	Unknown	Yorkshire	European pigs	Unknown	Unknown	26443118	24330687	0.9201	15418	0.483202	Lymph node	Lymph node	Lymph node
SAMEA6809317	PRJEB37565	PAIRED	ILLUMINA	Illumina HiSeq 3000	Sus scrofa domesticus	Unknown	Yorkshire	European pigs	Unknown	Unknown	24466504	22886896	0.9354	15975	0.500658	Lymph node	Lymph node	Lymph node
SAMEA6809318	PRJEB37565	PAIRED	ILLUMINA	Illumina HiSeq 3000	Sus scrofa domesticus	Unknown	Yorkshire	European pigs	Unknown	Unknown	27364783	26260845	0.9597	14918	0.467532	Lymph node	Lymph node	Lymph node
SAMEA6809319	PRJEB37565	PAIRED	ILLUMINA	Illumina HiSeq 3000	Sus scrofa domesticus	Unknown	Yorkshire	European pigs	Unknown	Unknown	23662086	22409937	0.9471	15110	0.473549	Lymph node	Lymph node	Lymph node
SAMEA6809320	PRJEB37565	PAIRED	ILLUMINA	Illumina HiSeq 3000	Sus scrofa domesticus	Unknown	Yorkshire	European pigs	Unknown	Unknown	24863156	23623880	0.9502	16113	0.504983	Lymph node	Lymph node	Lymph node
SAMEA6809321	PRJEB37565	PAIRED	ILLUMINA	Illumina HiSeq 3000	Sus scrofa domesticus	Unknown	Yorkshire	European pigs	Unknown	Unknown	25244358	24124790	0.9557	15556	0.487527	Lymph node	Lymph node	Lymph node
SAMEA6809322	PRJEB37565	PAIRED	ILLUMINA	Illumina HiSeq 3000	Sus scrofa domesticus	Unknown	Yorkshire	European pigs	Unknown	Unknown	26293662	25315370	0.9628	15364	0.481509	Lymph node	Lymph node	Lymph node
SAMEA6809323	PRJEB37565	PAIRED	ILLUMINA	Illumina HiSeq 3000	Sus scrofa domesticus	Unknown	Yorkshire	European pigs	Unknown	Unknown	26222667	25219076	0.9617	15504	0.485897	Lymph node	Lymph node	Lymph node
SAMEA6809324	PRJEB37565	PAIRED	ILLUMINA	Illumina HiSeq 3000	Sus scrofa domesticus	Unknown	Yorkshire	European pigs	Unknown	Unknown	25470730	24257327	0.9524	14909	0.46725	Lymph node	Lymph node	Lymph node
SAMEA6809325	PRJEB37565	PAIRED	ILLUMINA	Illumina HiSeq 3000	Sus scrofa domesticus	Unknown	Yorkshire	European pigs	Unknown	Unknown	24779014	23526243	0.9494	15483	0.485239	Lymph node	Lymph node	Lymph node
SAMEA6809326	PRJEB37565	PAIRED	ILLUMINA	Illumina HiSeq 3000	Sus scrofa domesticus	Unknown	Yorkshire	European pigs	Unknown	Unknown	25546980	24529934	0.9602	15303	0.479598	Lymph node	Lymph node	Lymph node
SAMEA6809327	PRJEB37565	PAIRED	ILLUMINA	Illumina HiSeq 3000	Sus scrofa domesticus	Unknown	Yorkshire	European pigs	Unknown	Unknown	23148117	22330540	0.9647	16317	0.511376	Lymph node	Lymph node	Lymph node
SAMEA6809328	PRJEB37565	PAIRED	ILLUMINA	Illumina HiSeq 3000	Sus scrofa domesticus	Unknown	Yorkshire	European pigs	Unknown	Unknown	23980503	22957907	0.9574	16356	0.512599	Lymph node	Lymph node	Lymph node
SAMEA6809329	PRJEB37565	PAIRED	ILLUMINA	Illumina HiSeq 3000	Sus scrofa domesticus	Unknown	Yorkshire	European pigs	Unknown	Unknown	22669742	21608625	0.9532	15183	0.475837	Lymph node	Lymph node	Lymph node
SAMEA6809330	PRJEB37565	PAIRED	ILLUMINA	Illumina HiSeq 3000	Sus scrofa domesticus	Unknown	Yorkshire	European pigs	Unknown	Unknown	24507879	23672557	0.9659	15437	0.483797	Lymph node	Lymph node	Lymph node
SAMEA4454586	PRJEB37735	PAIRED	ILLUMINA	Illumina HiSeq 4000	Sus scrofa	Unknown	Unknown	Unknown	Unknown	6 months	58782494	54770251	0.9317	20145	0.631346	Colon	Large intestine	Colon	Outlier
SAMEA4454587	PRJEB37735	PAIRED	ILLUMINA	Illumina HiSeq 4000	Sus scrofa	Unknown	Yorkshire	European pigs	Unknown	6 months	53469420	48487425	0.9068	19093	0.598377	Duodenum	Small intestine	Duodenum
SAMEA4454591	PRJEB37735	PAIRED	ILLUMINA	Illumina HiSeq 4000	Sus scrofa	Unknown	Yorkshire	European pigs	Unknown	6 months	62970694	57423350	0.9119	18829	0.590103	Duodenum	Small intestine	Duodenum
SAMEA4454595	PRJEB37735	PAIRED	ILLUMINA	Illumina HiSeq 4000	Sus scrofa	Unknown	Unknown	Unknown	Unknown	6 months	50027716	46584796	0.9312	19649	0.615802	Stomach	Stomach	Stomach	Outlier
SAMEA4454596	PRJEB37735	PAIRED	ILLUMINA	Illumina HiSeq 4000	Sus scrofa	Unknown	Yorkshire	European pigs	Unknown	6 months	61040162	56980536	0.9335	19875	0.622885	Ileum	Small intestine	Ileum
SAMEA4454598	PRJEB37735	PAIRED	ILLUMINA	Illumina HiSeq 4000	Sus scrofa	Unknown	Yorkshire	European pigs	Unknown	6 months	53070286	48972769	0.9228	19744	0.618779	Jejunum	Small intestine	Jejunum
SAMEA4454599	PRJEB37735	PAIRED	ILLUMINA	Illumina HiSeq 4000	Sus scrofa	Unknown	Yorkshire	European pigs	Unknown	6 months	55721959	51306383	0.9208	19371	0.607089	Jejunum	Small intestine	Jejunum
SAMEA4454602	PRJEB37735	PAIRED	ILLUMINA	Illumina HiSeq 4000	Sus scrofa	Unknown	Unknown	Unknown	Unknown	6 months	0	0	0	0	0	Unknown	Unknown	Unknown
SAMEA4454607	PRJEB37735	PAIRED	ILLUMINA	Illumina HiSeq 4000	Sus scrofa	Unknown	Unknown	Unknown	Unknown	6 months	102998698	98096838	0.9524	18641	0.584211	Stomach	Other	Other	Outlier
SAMEA6712329	PRJEB37735	PAIRED	ILLUMINA	Illumina HiSeq 4000	Sus scrofa	Unknown	Unknown	Unknown	Unknown	6 months	41503270	38014775	0.9159	19336	0.605992	Colon	Large intestine	Colon	Outlier
SAMEA6878153	PRJEB37735	PAIRED	ILLUMINA	Illumina HiSeq 4000	Sus scrofa	Unknown	Unknown	Unknown	Unknown	6 months	54941261	50144652	0.9127	18758	0.587878	Caecum	Large intestine	Caecum	Outlier
SAMEA6878156	PRJEB37735	PAIRED	ILLUMINA	Illumina HiSeq 4000	Sus scrofa	Unknown	Unknown	Unknown	Unknown	6 months	61013083	55392769	0.9079	18794	0.589006	Caecum	Large intestine	Caecum	Outlier
SAMEA6832284	PRJEB38156	PAIRED	ILLUMINA	Illumina NovaSeq 6000	Sus scrofa domesticus	Large white	Unknown	Unknown	Unknown	Unknown	21652581	20231325	0.9344	19738	0.618591	Unknown	Other	Other	Outlier
SAMEA6832285	PRJEB38156	PAIRED	ILLUMINA	Illumina NovaSeq 6000	Sus scrofa domesticus	Large white	Unknown	Unknown	Unknown	Unknown	14059673	13018397	0.9259	20063	0.628776	Unknown	Other	Other	Outlier
SAMEA6850438	PRJEB38415	PAIRED	ILLUMINA	Illumina HiSeq 2500	Sus scrofa	Landrace	Landrace x Yorkshire	Cross	Female	16 months	22851216	21216595	0.9285	15644	0.490285	Jejunum	Small intestine	Jejunum
SAMEA6850439	PRJEB38415	PAIRED	ILLUMINA	Illumina HiSeq 2500	Sus scrofa	Landrace	Landrace x Yorkshire	Cross	Female	16 months	23312037	22418092	0.9617	15726	0.492854	Kidney	Kidney	Kidney
SAMEA6850440	PRJEB38415	PAIRED	ILLUMINA	Illumina HiSeq 2500	Sus scrofa	Landrace	Landrace x Yorkshire	Cross	Female	16 months	29078436	27301582	0.9389	14674	0.459885	Jejunum	Small intestine	Jejunum
SAMEA6850441	PRJEB38415	PAIRED	ILLUMINA	Illumina HiSeq 2500	Sus scrofa	Landrace	Landrace x Yorkshire	Cross	Female	16 months	33531252	32184127	0.9598	16036	0.50257	Kidney	Kidney	Kidney
SAMEA6850442	PRJEB38415	PAIRED	ILLUMINA	Illumina HiSeq 2500	Sus scrofa	Landrace	Landrace	European pigs	Female	16 months	20879790	19592356	0.9383	13831	0.433465	Jejunum	Small intestine	Jejunum
SAMEA6850443	PRJEB38415	PAIRED	ILLUMINA	Illumina HiSeq 2500	Sus scrofa	Landrace	Landrace x Yorkshire	Cross	Female	16 months	27576353	26502486	0.9611	16301	0.510875	Kidney	Kidney	Kidney
SAMEA6850444	PRJEB38415	PAIRED	ILLUMINA	Illumina HiSeq 2500	Sus scrofa	Landrace	Landrace x Yorkshire	Cross	Female	16 months	53275192	50014970	0.9388	14307	0.448383	Jejunum	Small intestine	Jejunum
SAMEA6850445	PRJEB38415	PAIRED	ILLUMINA	Illumina HiSeq 2500	Sus scrofa	Landrace	Landrace x Yorkshire	Cross	Female	16 months	20587143	19599383	0.952	16229	0.508619	Kidney	Kidney	Kidney
SAMEA6850446	PRJEB38415	PAIRED	ILLUMINA	Illumina HiSeq 2500	Sus scrofa	Landrace	Landrace x Yorkshire	Cross	Female	16 months	24552440	23239156	0.9465	14477	0.453711	Jejunum	Small intestine	Jejunum
SAMEA6850447	PRJEB38415	PAIRED	ILLUMINA	Illumina HiSeq 2500	Sus scrofa	Landrace	Landrace x Yorkshire	Cross	Female	16 months	23814767	22878717	0.9607	16470	0.516171	Kidney	Kidney	Kidney
SAMEA6850448	PRJEB38415	PAIRED	ILLUMINA	Illumina HiSeq 2500	Sus scrofa	Landrace	Landrace x Yorkshire	Cross	Female	16 months	22058046	20683303	0.9377	13310	0.417137	Jejunum	Small intestine	Jejunum
SAMEA6850449	PRJEB38415	PAIRED	ILLUMINA	Illumina HiSeq 2500	Sus scrofa	Landrace	Landrace x Yorkshire	Cross	Female	16 months	28795110	27641803	0.9599	15899	0.498276	Kidney	Kidney	Kidney
SAMEA6850450	PRJEB38415	PAIRED	ILLUMINA	Illumina HiSeq 2500	Sus scrofa	Landrace	Landrace x Yorkshire	Cross	Female	16 months	21396085	20085257	0.9387	14661	0.459477	Jejunum	Small intestine	Jejunum
SAMEA6850451	PRJEB38415	PAIRED	ILLUMINA	Illumina HiSeq 2500	Sus scrofa	Landrace	Landrace x Yorkshire	Cross	Female	16 months	32009949	30683289	0.9586	15791	0.494892	Kidney	Kidney	Kidney
SAMEA6850452	PRJEB38415	PAIRED	ILLUMINA	Illumina HiSeq 2500	Sus scrofa	Landrace	Landrace x Yorkshire	Cross	Female	16 months	61999703	58352971	0.9412	14310	0.448477	Jejunum	Small intestine	Jejunum
SAMEA6850453	PRJEB38415	PAIRED	ILLUMINA	Illumina HiSeq 2500	Sus scrofa	Landrace	Landrace x Yorkshire	Cross	Female	16 months	28349873	27232548	0.9606	16107	0.504795	Kidney	Kidney	Kidney
SAMEA6850454	PRJEB38415	PAIRED	ILLUMINA	Illumina HiSeq 2500	Sus scrofa	Landrace	Landrace x Yorkshire	Cross	Female	16 months	35401509	33425881	0.9442	14050	0.440328	Jejunum	Small intestine	Jejunum
SAMEA6850455	PRJEB38415	PAIRED	ILLUMINA	Illumina HiSeq 2500	Sus scrofa	Landrace	Landrace x Yorkshire	Cross	Female	16 months	16426582	15696844	0.9556	15771	0.494265	Kidney	Kidney	Kidney
SAMEA6850456	PRJEB38415	PAIRED	ILLUMINA	Illumina HiSeq 2500	Sus scrofa	Landrace	Landrace	European pigs	Female	16 months	44487851	41931425	0.9425	14575	0.456782	Jejunum	Small intestine	Jejunum
SAMEA6850457	PRJEB38415	PAIRED	ILLUMINA	Illumina HiSeq 2500	Sus scrofa	Landrace	Landrace	European pigs	Female	16 months	22984854	22024647	0.9582	16179	0.507052	Kidney	Kidney	Kidney
SAMEA6850458	PRJEB38415	PAIRED	ILLUMINA	Illumina HiSeq 2500	Sus scrofa	Landrace	Landrace x Yorkshire	Cross	Female	16 months	22889165	21429652	0.9362	13618	0.42679	Jejunum	Small intestine	Jejunum
SAMEA6850459	PRJEB38415	PAIRED	ILLUMINA	Illumina HiSeq 2500	Sus scrofa	Landrace	Landrace	European pigs	Female	16 months	23980461	22951697	0.9571	15869	0.497336	Kidney	Kidney	Kidney
SAMEA6850460	PRJEB38415	PAIRED	ILLUMINA	Illumina HiSeq 2500	Sus scrofa	Landrace	Landrace	European pigs	Female	16 months	28380055	26487697	0.9333	13970	0.437821	Jejunum	Small intestine	Jejunum
SAMEA6850461	PRJEB38415	PAIRED	ILLUMINA	Illumina HiSeq 2500	Sus scrofa	Landrace	Landrace x Yorkshire	Cross	Female	16 months	22846720	21819759	0.955	16320	0.51147	Kidney	Kidney	Kidney
SAMEA6850462	PRJEB38415	PAIRED	ILLUMINA	Illumina HiSeq 2500	Sus scrofa	Landrace	Landrace x Yorkshire	Cross	Female	16 months	44308941	41575155	0.9383	15356	0.481259	Jejunum	Small intestine	Jejunum
SAMEA6850463	PRJEB38415	PAIRED	ILLUMINA	Illumina HiSeq 2500	Sus scrofa	Landrace	Landrace x Yorkshire	Cross	Female	16 months	55648425	53344696	0.9586	16402	0.51404	Kidney	Kidney	Kidney
SAMEA6850464	PRJEB38415	PAIRED	ILLUMINA	Illumina HiSeq 2500	Sus scrofa	Landrace	Landrace x Yorkshire	Cross	Female	16 months	31359148	29227750	0.932	15427	0.483484	Jejunum	Small intestine	Jejunum
SAMEA6850465	PRJEB38415	PAIRED	ILLUMINA	Illumina HiSeq 2500	Sus scrofa	Landrace	Landrace x Yorkshire	Cross	Female	16 months	24443834	23442574	0.959	16023	0.502162	Kidney	Kidney	Kidney
SAMEA7130231	PRJEB39729	PAIRED	ILLUMINA	Illumina HiSeq 2000	Sus scrofa domesticus	Unknown	Landrace x Yorkshire	Cross	Unknown	Unknown	67733914	61372226	0.9061	22611	0.708631	Hypothalamus	Brain	Hypothalamus
SAMEA7130232	PRJEB39729	PAIRED	ILLUMINA	Illumina HiSeq 2000	Sus scrofa domesticus	Unknown	Landrace x Yorkshire	Cross	Unknown	Unknown	66894590	60156184	0.8993	21104	0.661402	Hypothalamus	Brain	Hypothalamus
SAMEA7130233	PRJEB39729	PAIRED	ILLUMINA	Illumina HiSeq 2000	Sus scrofa domesticus	Unknown	Landrace x Yorkshire	Cross	Unknown	Unknown	60770612	56073698	0.9227	23444	0.734737	Hypothalamus	Brain	Hypothalamus
SAMEA7130234	PRJEB39729	PAIRED	ILLUMINA	Illumina HiSeq 2000	Sus scrofa domesticus	Unknown	Landrace x Yorkshire	Cross	Unknown	Unknown	74907194	60803158	0.8117	22371	0.701109	Hypothalamus	Brain	Hypothalamus
SAMEA7130235	PRJEB39729	PAIRED	ILLUMINA	Illumina HiSeq 2000	Sus scrofa domesticus	Unknown	Landrace x Yorkshire	Cross	Unknown	Unknown	65663584	58399926	0.8894	22769	0.713583	Hypothalamus	Brain	Hypothalamus
SAMEA7130236	PRJEB39729	PAIRED	ILLUMINA	Illumina HiSeq 2000	Sus scrofa domesticus	Unknown	Landrace x Yorkshire	Cross	Unknown	Unknown	64062514	59174470	0.9237	22850	0.716121	Hypothalamus	Brain	Hypothalamus
SAMEA7130237	PRJEB39729	PAIRED	ILLUMINA	Illumina HiSeq 2000	Sus scrofa domesticus	Unknown	Landrace x Yorkshire	Cross	Unknown	Unknown	63105228	54703468	0.8669	20598	0.645543	Hypothalamus	Brain	Hypothalamus
SAMEA7130238	PRJEB39729	PAIRED	ILLUMINA	Illumina HiSeq 2000	Sus scrofa domesticus	Unknown	Landrace x Yorkshire	Cross	Unknown	Unknown	61676976	58448554	0.9477	23599	0.739595	Hypothalamus	Brain	Hypothalamus
SAMEA7130239	PRJEB39729	PAIRED	ILLUMINA	Illumina HiSeq 2000	Sus scrofa domesticus	Unknown	Landrace x Yorkshire	Cross	Unknown	Unknown	69600460	65404200	0.9397	23338	0.731415	Hypothalamus	Brain	Hypothalamus
SAMEA7130240	PRJEB39730	PAIRED	ILLUMINA	Illumina HiSeq 2000	Sus scrofa domesticus	Unknown	Landrace x Yorkshire	Cross	Unknown	Unknown	61395464	57996910	0.9446	26473	0.829667	Ovary	Ovary	Ovary
SAMEA7130241	PRJEB39730	PAIRED	ILLUMINA	Illumina HiSeq 2000	Sus scrofa domesticus	Unknown	Landrace x Yorkshire	Cross	Unknown	Unknown	72716834	68682184	0.9445	28671	0.898552	Ovary	Ovary	Ovary
SAMEA7130242	PRJEB39730	PAIRED	ILLUMINA	Illumina HiSeq 2000	Sus scrofa domesticus	Unknown	Landrace x Yorkshire	Cross	Unknown	Unknown	67867876	63564018	0.9366	22244	0.697129	Ovary	Ovary	Ovary
SAMEA7130243	PRJEB39730	PAIRED	ILLUMINA	Illumina HiSeq 2000	Sus scrofa domesticus	Unknown	Landrace x Yorkshire	Cross	Unknown	Unknown	60241742	49337184	0.819	29637	0.928827	Ovary	Ovary	Ovary
SAMEA7130244	PRJEB39730	PAIRED	ILLUMINA	Illumina HiSeq 2000	Sus scrofa domesticus	Unknown	Landrace x Yorkshire	Cross	Unknown	Unknown	56884328	51211528	0.9003	22330	0.699824	Ovary	Ovary	Ovary
SAMEA7130245	PRJEB39730	PAIRED	ILLUMINA	Illumina HiSeq 2000	Sus scrofa domesticus	Unknown	Landrace x Yorkshire	Cross	Unknown	Unknown	69095360	64504704	0.9336	21992	0.689232	Ovary	Ovary	Ovary
SAMEA7130246	PRJEB39730	PAIRED	ILLUMINA	Illumina HiSeq 2000	Sus scrofa domesticus	Unknown	Landrace x Yorkshire	Cross	Unknown	Unknown	61585592	53121924	0.8626	19415	0.608468	Ovary	Ovary	Ovary
SAMEA7130247	PRJEB39730	PAIRED	ILLUMINA	Illumina HiSeq 2000	Sus scrofa domesticus	Unknown	Landrace x Yorkshire	Cross	Unknown	Unknown	63242874	57963056	0.9165	20401	0.639369	Ovary	Ovary	Ovary
SAMEA7130248	PRJEB39730	PAIRED	ILLUMINA	Illumina HiSeq 2000	Sus scrofa domesticus	Unknown	Landrace x Yorkshire	Cross	Unknown	Unknown	67670806	60545586	0.8947	18835	0.590291	Ovary	Ovary	Ovary
SAMEA7131531	PRJEB39754	PAIRED	ILLUMINA	Illumina HiSeq 2000	Sus scrofa domesticus	Unknown	Landrace x Yorkshire	Cross	Unknown	Unknown	34901237	28225505	0.8087	20203	0.633164	Pituitary	Brain	Pituitary
SAMEA7131532	PRJEB39754	PAIRED	ILLUMINA	Illumina HiSeq 2000	Sus scrofa domesticus	Unknown	Landrace x Yorkshire	Cross	Unknown	Unknown	41539314	35221111	0.8479	20538	0.643663	Pituitary	Brain	Pituitary
SAMEA7131533	PRJEB39754	PAIRED	ILLUMINA	Illumina HiSeq 2000	Sus scrofa domesticus	Unknown	Landrace x Yorkshire	Cross	Unknown	Unknown	34382770	29619793	0.8615	22020	0.690109	Pituitary	Brain	Pituitary
SAMEA7131534	PRJEB39754	PAIRED	ILLUMINA	Illumina HiSeq 2000	Sus scrofa domesticus	Unknown	Landrace x Yorkshire	Cross	Unknown	Unknown	34772199	29344795	0.8439	20367	0.638304	Pituitary	Brain	Pituitary
SAMEA7131535	PRJEB39754	PAIRED	ILLUMINA	Illumina HiSeq 2000	Sus scrofa domesticus	Unknown	Landrace x Yorkshire	Cross	Unknown	Unknown	39637470	32581551	0.822	20090	0.629623	Pituitary	Brain	Pituitary
SAMEA7131536	PRJEB39754	PAIRED	ILLUMINA	Illumina HiSeq 2000	Sus scrofa domesticus	Unknown	Landrace x Yorkshire	Cross	Unknown	Unknown	34561662	30818009	0.8917	20081	0.629341	Pituitary	Brain	Pituitary
SAMEA7131537	PRJEB39754	PAIRED	ILLUMINA	Illumina HiSeq 2000	Sus scrofa domesticus	Unknown	Landrace x Yorkshire	Cross	Unknown	Unknown	31240744	28484879	0.9118	21654	0.678639	Pituitary	Brain	Pituitary
SAMEA7131538	PRJEB39754	PAIRED	ILLUMINA	Illumina HiSeq 2000	Sus scrofa domesticus	Unknown	Landrace x Yorkshire	Cross	Unknown	Unknown	36660918	32978030	0.8995	20743	0.650088	Pituitary	Brain	Pituitary
SAMEA7131539	PRJEB39754	PAIRED	ILLUMINA	Illumina HiSeq 2000	Sus scrofa domesticus	Unknown	Landrace x Yorkshire	Cross	Unknown	Unknown	38702289	33235897	0.8588	19848	0.622038	Pituitary	Brain	Pituitary
SAMEA7226790	PRJEB39914	PAIRED	ILLUMINA	NextSeq 500	Sus scrofa domesticus	Unknown	Duroc x (Landrace x Yorkshire)	Cross	Unknown	Unknown	28873506	27618262	0.9565	17848	0.559358	PCLS	Lung	Lung
SAMEA7226791	PRJEB39914	PAIRED	ILLUMINA	NextSeq 500	Sus scrofa domesticus	Unknown	Duroc x (Landrace x Yorkshire)	Cross	Unknown	Unknown	23476220	22363836	0.9526	17539	0.549674	PCLS	Lung	Lung
SAMEA7226792	PRJEB39914	PAIRED	ILLUMINA	NextSeq 500	Sus scrofa domesticus	Unknown	Duroc x (Landrace x Yorkshire)	Cross	Unknown	Unknown	26548797	25400194	0.9567	17518	0.549016	PCLS	Lung	Lung
SAMEA7226793	PRJEB39914	PAIRED	ILLUMINA	NextSeq 500	Sus scrofa domesticus	Unknown	Duroc x (Landrace x Yorkshire)	Cross	Unknown	Unknown	24289304	23235968	0.9566	17583	0.551053	PCLS	Lung	Lung
SAMEA7629003	PRJEB41970	PAIRED	ILLUMINA	Illumina NovaSeq 6000	Sus scrofa	Large white	Unknown	Unknown	Unknown	0 day	102939665	96261061	0.9351	16490	0.516798	Liver	Liver	Liver	Outlier
SAMEA7629004	PRJEB41970	PAIRED	ILLUMINA	Illumina NovaSeq 6000	Sus scrofa	Large white	Unknown	Unknown	Unknown	0 day	100584256	93748824	0.932	17003	0.532876	Liver	Liver	Liver	Outlier
SAMEA7629005	PRJEB41970	PAIRED	ILLUMINA	Illumina NovaSeq 6000	Sus scrofa	Large white	Unknown	Unknown	Unknown	0 day	66238285	61467319	0.928	16961	0.531559	Liver	Liver	Liver	Outlier
SAMEA7629006	PRJEB41970	PAIRED	ILLUMINA	Illumina NovaSeq 6000	Sus scrofa	Large white	Unknown	Unknown	Unknown	0 day	189005330	174817020	0.9249	16602	0.520308	Liver	Liver	Liver	Outlier
SAMEA7629007	PRJEB41970	PAIRED	ILLUMINA	Illumina NovaSeq 6000	Sus scrofa	Large white	Unknown	Unknown	Unknown	0 day	89612977	85022540	0.9488	20331	0.637176	Small intestine	Small intestine	Small intestine	Outlier
SAMEA7629008	PRJEB41970	PAIRED	ILLUMINA	Illumina NovaSeq 6000	Sus scrofa	Large white	Unknown	Unknown	Unknown	0 day	89999998	85576426	0.9508	20116	0.630438	Small intestine	Small intestine	Small intestine	Outlier
SAMEA7629009	PRJEB41970	PAIRED	ILLUMINA	Illumina NovaSeq 6000	Sus scrofa	Large white	Unknown	Unknown	Unknown	0 day	95996720	91330049	0.9514	19931	0.62464	Small intestine	Small intestine	Small intestine	Outlier
SAMEA7629010	PRJEB41970	PAIRED	ILLUMINA	Illumina NovaSeq 6000	Sus scrofa	Large white	Unknown	Unknown	Unknown	0 day	93259849	88591653	0.9499	20337	0.637364	Small intestine	Small intestine	Small intestine	Outlier
SAMEA7629011	PRJEB41970	PAIRED	ILLUMINA	Illumina NovaSeq 6000	Sus scrofa	Large white	Yorkshire	European pigs	Unknown	0 day	27567728	26037842	0.9445	20183	0.632537	Lung	Lung	Lung
SAMEA7629012	PRJEB41970	PAIRED	ILLUMINA	Illumina NovaSeq 6000	Sus scrofa	Large white	Yorkshire	European pigs	Unknown	0 day	164178112	155470744	0.947	21096	0.661151	Lung	Lung	Lung
SAMEA7629013	PRJEB41970	PAIRED	ILLUMINA	Illumina NovaSeq 6000	Sus scrofa	Large white	Yorkshire	European pigs	Unknown	0 day	144078669	136049007	0.9443	20729	0.649649	Lung	Lung	Lung
SAMEA7629014	PRJEB41970	PAIRED	ILLUMINA	Illumina NovaSeq 6000	Sus scrofa	Large white	Yorkshire	European pigs	Unknown	0 day	148198382	139746145	0.943	20811	0.652219	Lung	Lung	Lung
SAMEA7629015	PRJEB41970	PAIRED	ILLUMINA	Illumina NovaSeq 6000	Sus scrofa	Large white	Unknown	Unknown	Unknown	0 day	73795577	70225750	0.9516	19466	0.610066	Embryonic muscle	Embryo	Embryo	Outlier
SAMEA7629016	PRJEB41970	PAIRED	ILLUMINA	Illumina NovaSeq 6000	Sus scrofa	Large white	Unknown	Unknown	Unknown	0 day	73433144	69636373	0.9483	18560	0.581672	Embryonic muscle	Embryo	Embryo	Outlier
SAMEA7629017	PRJEB41970	PAIRED	ILLUMINA	Illumina NovaSeq 6000	Sus scrofa	Large white	Unknown	Unknown	Unknown	0 day	74093328	70279281	0.9485	19566	0.6132	Embryonic muscle	Embryo	Embryo	Outlier
SAMEA7629018	PRJEB41970	PAIRED	ILLUMINA	Illumina NovaSeq 6000	Sus scrofa	Large white	Unknown	Unknown	Unknown	0 day	96269267	91369317	0.9491	19660	0.616146	Embryonic muscle	Embryo	Embryo	Outlier
SAMEA7629019	PRJEB41970	PAIRED	ILLUMINA	Illumina NovaSeq 6000	Sus scrofa	Large white	Unknown	Unknown	Unknown	0 day	85537096	80679096	0.9432	19997	0.626708	Kidney	Kidney	Kidney	Outlier
SAMEA7629020	PRJEB41970	PAIRED	ILLUMINA	Illumina NovaSeq 6000	Sus scrofa	Large white	Unknown	Unknown	Unknown	0 day	4264012	4029826	0.9451	17572	0.550708	Kidney	Kidney	Kidney	Outlier
SAMEA7629021	PRJEB41970	PAIRED	ILLUMINA	Illumina NovaSeq 6000	Sus scrofa	Large white	Unknown	Unknown	Unknown	0 day	74591029	70890109	0.9504	19726	0.618215	Kidney	Kidney	Kidney	Outlier
SAMEA7629022	PRJEB41970	PAIRED	ILLUMINA	Illumina NovaSeq 6000	Sus scrofa	Large white	Unknown	Unknown	Unknown	0 day	92739699	87654321	0.9452	19241	0.603015	Kidney	Kidney	Kidney	Outlier
SAMEA7629023	PRJEB41970	PAIRED	ILLUMINA	Illumina NovaSeq 6000	Sus scrofa	Large white	Unknown	Unknown	Unknown	0 day	104422074	99451576	0.9524	19757	0.619186	Cerebellum	Brain	Brain	Outlier
SAMEA7629024	PRJEB41970	PAIRED	ILLUMINA	Illumina NovaSeq 6000	Sus scrofa	Large white	Unknown	Unknown	Unknown	0 day	77259823	73465367	0.9509	19992	0.626551	Cerebellum	Brain	Brain	Outlier
SAMEA7629025	PRJEB41970	PAIRED	ILLUMINA	Illumina NovaSeq 6000	Sus scrofa	Large white	Unknown	Unknown	Unknown	0 day	77580723	73811967	0.9514	19796	0.620409	Cerebellum	Brain	Brain	Outlier
SAMEA7629026	PRJEB41970	PAIRED	ILLUMINA	Illumina NovaSeq 6000	Sus scrofa	Large white	Unknown	Unknown	Unknown	0 day	67250071	64061744	0.9526	19587	0.613859	Cerebellum	Brain	Brain	Outlier
SAMEA7629027	PRJEB41970	PAIRED	ILLUMINA	Illumina NovaSeq 6000	Sus scrofa	Large white	Yorkshire	European pigs	Unknown	0 day	90419692	86388060	0.9554	20219	0.633666	Skin	Skin	Skin
SAMEA7629028	PRJEB41970	PAIRED	ILLUMINA	Illumina NovaSeq 6000	Sus scrofa	Large white	Yorkshire	European pigs	Unknown	0 day	151623370	144249951	0.9514	21096	0.661151	Skin	Skin	Skin
SAMEA7629029	PRJEB41970	PAIRED	ILLUMINA	Illumina NovaSeq 6000	Sus scrofa	Large white	Yorkshire	European pigs	Unknown	0 day	127589199	121835792	0.9549	20492	0.642221	Skin	Skin	Skin
SAMEA7629030	PRJEB41970	PAIRED	ILLUMINA	Illumina NovaSeq 6000	Sus scrofa	Large white	Yorkshire	European pigs	Unknown	0 day	131752373	125707542	0.9541	20380	0.638711	Skin	Skin	Skin
SAMEA7629031	PRJEB41970	PAIRED	ILLUMINA	Illumina NovaSeq 6000	Sus scrofa	Large white	Unknown	Unknown	Unknown	1 day	86206743	80892031	0.9383	17744	0.556099	Liver	Liver	Liver	Outlier
SAMEA7629032	PRJEB41970	PAIRED	ILLUMINA	Illumina NovaSeq 6000	Sus scrofa	Large white	Unknown	Unknown	Unknown	1 day	106468531	99355094	0.9332	17923	0.561709	Liver	Liver	Liver	Outlier
SAMEA7629033	PRJEB41970	PAIRED	ILLUMINA	Illumina NovaSeq 6000	Sus scrofa	Large white	Unknown	Unknown	Unknown	1 day	101464890	95394893	0.9402	17925	0.561771	Liver	Liver	Liver	Outlier
SAMEA7629034	PRJEB41970	PAIRED	ILLUMINA	Illumina NovaSeq 6000	Sus scrofa	Large white	Unknown	Unknown	Unknown	1 day	130192573	123529344	0.9488	17274	0.541369	Liver	Liver	Liver	Outlier
SAMEA7629035	PRJEB41970	PAIRED	ILLUMINA	Illumina NovaSeq 6000	Sus scrofa	Large white	Yorkshire	European pigs	Unknown	1 day	81898964	77206561	0.9427	19678	0.616711	Ileum	Small intestine	Ileum
SAMEA7629036	PRJEB41970	PAIRED	ILLUMINA	Illumina NovaSeq 6000	Sus scrofa	Large white	Yorkshire	European pigs	Unknown	1 day	77242833	73309073	0.9491	19538	0.612323	Ileum	Small intestine	Ileum
SAMEA7629037	PRJEB41970	PAIRED	ILLUMINA	Illumina NovaSeq 6000	Sus scrofa	Large white	Yorkshire	European pigs	Unknown	1 day	85625158	80599959	0.9413	20359	0.638053	Ileum	Small intestine	Ileum
SAMEA7629038	PRJEB41970	PAIRED	ILLUMINA	Illumina NovaSeq 6000	Sus scrofa	Large white	Yorkshire	European pigs	Unknown	1 day	136105408	128613253	0.945	19496	0.611007	Ileum	Small intestine	Ileum
SAMEA7629039	PRJEB41970	PAIRED	ILLUMINA	Illumina NovaSeq 6000	Sus scrofa	Large white	Unknown	Unknown	Unknown	1 day	103784619	98450458	0.9486	20206	0.633258	Lung	Lung	Lung	Outlier
SAMEA7629040	PRJEB41970	PAIRED	ILLUMINA	Illumina NovaSeq 6000	Sus scrofa	Large white	Unknown	Unknown	Unknown	1 day	87426780	82789472	0.947	20290	0.635891	Lung	Lung	Lung	Outlier
SAMEA7629041	PRJEB41970	PAIRED	ILLUMINA	Illumina NovaSeq 6000	Sus scrofa	Large white	Unknown	Unknown	Unknown	1 day	26578176	25184437	0.9476	19531	0.612104	Lung	Lung	Lung	Outlier
SAMEA7629042	PRJEB41970	PAIRED	ILLUMINA	Illumina NovaSeq 6000	Sus scrofa	Large white	Unknown	Unknown	Unknown	1 day	131941932	124781733	0.9457	20149	0.631472	Lung	Lung	Lung	Outlier
SAMEA7629043	PRJEB41970	PAIRED	ILLUMINA	Illumina NovaSeq 6000	Sus scrofa	Large white	Unknown	Unknown	Unknown	1 day	173344026	165565742	0.9551	16245	0.50912	Muscle	Muscle	Muscle	Outlier
SAMEA7629044	PRJEB41970	PAIRED	ILLUMINA	Illumina NovaSeq 6000	Sus scrofa	Large white	Unknown	Unknown	Unknown	1 day	97816098	92925769	0.95	17492	0.548201	Muscle	Muscle	Muscle	Outlier
SAMEA7629045	PRJEB41970	PAIRED	ILLUMINA	Illumina NovaSeq 6000	Sus scrofa	Large white	Unknown	Unknown	Unknown	1 day	124106457	117400604	0.946	17171	0.538141	Muscle	Muscle	Muscle	Outlier
SAMEA7629046	PRJEB41970	PAIRED	ILLUMINA	Illumina NovaSeq 6000	Sus scrofa	Large white	Unknown	Unknown	Unknown	1 day	143545385	136330768	0.9497	17402	0.54538	Muscle	Muscle	Muscle	Outlier
SAMEA7629047	PRJEB41970	PAIRED	ILLUMINA	Illumina NovaSeq 6000	Sus scrofa	Large white	Unknown	Unknown	Unknown	1 day	88161785	83129027	0.9429	19966	0.625736	Kidney	Kidney	Kidney	Outlier
SAMEA7629048	PRJEB41970	PAIRED	ILLUMINA	Illumina NovaSeq 6000	Sus scrofa	Large white	Unknown	Unknown	Unknown	1 day	110715691	104343643	0.9424	19615	0.614736	Kidney	Kidney	Kidney	Outlier
SAMEA7629049	PRJEB41970	PAIRED	ILLUMINA	Illumina NovaSeq 6000	Sus scrofa	Large white	Unknown	Unknown	Unknown	1 day	117658091	111126032	0.9445	19632	0.615269	Kidney	Kidney	Kidney	Outlier
SAMEA7629050	PRJEB41970	PAIRED	ILLUMINA	Illumina NovaSeq 6000	Sus scrofa	Large white	Unknown	Unknown	Unknown	1 day	111391136	105721965	0.9491	19235	0.602827	Kidney	Kidney	Kidney	Outlier
SAMEA7629051	PRJEB41970	PAIRED	ILLUMINA	Illumina NovaSeq 6000	Sus scrofa	Large white	Unknown	Unknown	Unknown	1 day	95837755	91171418	0.9513	19160	0.600476	Cerebellum	Brain	Brain	Outlier
SAMEA7629052	PRJEB41970	PAIRED	ILLUMINA	Illumina NovaSeq 6000	Sus scrofa	Large white	Unknown	Unknown	Unknown	1 day	77821878	73818958	0.9486	19400	0.607998	Cerebellum	Brain	Brain	Outlier
SAMEA7629053	PRJEB41970	PAIRED	ILLUMINA	Illumina NovaSeq 6000	Sus scrofa	Large white	Unknown	Unknown	Unknown	1 day	99906132	95084845	0.9517	19531	0.612104	Cerebellum	Brain	Brain	Outlier
SAMEA7629054	PRJEB41970	PAIRED	ILLUMINA	Illumina NovaSeq 6000	Sus scrofa	Large white	Unknown	Unknown	Unknown	1 day	135840997	129527747	0.9535	19235	0.602827	Cerebellum	Brain	Brain	Outlier
SAMEA7629055	PRJEB41970	PAIRED	ILLUMINA	Illumina NovaSeq 6000	Sus scrofa	Large white	Yorkshire	European pigs	Unknown	1 day	95725295	90227878	0.9426	19288	0.604488	Skin	Skin	Skin
SAMEA7629056	PRJEB41970	PAIRED	ILLUMINA	Illumina NovaSeq 6000	Sus scrofa	Large white	Yorkshire	European pigs	Unknown	1 day	121300779	113667687	0.9371	19072	0.597718	Skin	Skin	Skin
SAMEA7629057	PRJEB41970	PAIRED	ILLUMINA	Illumina NovaSeq 6000	Sus scrofa	Large white	Yorkshire	European pigs	Unknown	1 day	92150504	86213312	0.9356	18875	0.591544	Skin	Skin	Skin
SAMEA7629058	PRJEB41970	PAIRED	ILLUMINA	Illumina NovaSeq 6000	Sus scrofa	Large white	Yorkshire	European pigs	Unknown	1 day	116184360	108832486	0.9367	19191	0.601448	Skin	Skin	Skin
SAMEA7629259	PRJEB41970	PAIRED	ILLUMINA	Illumina NovaSeq 6000	Sus scrofa	Large white	Unknown	Unknown	Unknown	Unknown	119527311	110111714	0.9212	17677	0.553999	Liver	Liver	Liver	Outlier
SAMEA7629260	PRJEB41970	PAIRED	ILLUMINA	Illumina NovaSeq 6000	Sus scrofa	Large white	Unknown	Unknown	Unknown	Unknown	170966904	162754078	0.952	21462	0.672621	Small intestine	Small intestine	Small intestine	Outlier
SAMEA7629261	PRJEB41970	PAIRED	ILLUMINA	Illumina NovaSeq 6000	Sus scrofa	Large white	Yorkshire	European pigs	Unknown	Unknown	70528273	67070787	0.951	21661	0.678858	Lung	Lung	Lung
SAMEA7629262	PRJEB41970	PAIRED	ILLUMINA	Illumina NovaSeq 6000	Sus scrofa	Large white	Unknown	Unknown	Unknown	Unknown	140724362	134392905	0.955	20945	0.656418	Embryonic muscle	Embryo	Embryo	Outlier
SAMEA7629263	PRJEB41970	PAIRED	ILLUMINA	Illumina NovaSeq 6000	Sus scrofa	Large white	Unknown	Unknown	Unknown	Unknown	148576752	140444409	0.9453	18894	0.59214	Kidney	Kidney	Kidney	Outlier
SAMEA7629264	PRJEB41970	PAIRED	ILLUMINA	Illumina NovaSeq 6000	Sus scrofa	Large white	Unknown	Unknown	Unknown	Unknown	119696613	113350353	0.947	21300	0.667544	Hind brain	Brain	Hind brain	Outlier
SAMEA7629265	PRJEB41970	PAIRED	ILLUMINA	Illumina NovaSeq 6000	Sus scrofa	Large white	Yorkshire	European pigs	Unknown	Unknown	115873279	109947855	0.9489	21265	0.666447	Skin	Skin	Skin
SAMEA7629266	PRJEB41970	PAIRED	ILLUMINA	Illumina NovaSeq 6000	Sus scrofa	Large white	Unknown	Unknown	Unknown	Unknown	111736310	103672902	0.9278	17412	0.545694	Liver	Liver	Liver	Outlier
SAMEA7629267	PRJEB41970	PAIRED	ILLUMINA	Illumina NovaSeq 6000	Sus scrofa	Large white	Unknown	Unknown	Unknown	Unknown	127267968	120797287	0.9492	21896	0.686223	Small intestine	Small intestine	Small intestine	Outlier
SAMEA7629268	PRJEB41970	PAIRED	ILLUMINA	Illumina NovaSeq 6000	Sus scrofa	Large white	Yorkshire	European pigs	Unknown	Unknown	133633144	127055073	0.9508	21706	0.680268	Lung	Lung	Lung
SAMEA7629269	PRJEB41970	PAIRED	ILLUMINA	Illumina NovaSeq 6000	Sus scrofa	Large white	Unknown	Unknown	Unknown	Unknown	113734788	108584335	0.9547	21196	0.664285	Embryonic muscle	Embryo	Embryo	Outlier
SAMEA7629270	PRJEB41970	PAIRED	ILLUMINA	Illumina NovaSeq 6000	Sus scrofa	Large white	Unknown	Unknown	Unknown	Unknown	79000860	74501381	0.943	19235	0.602827	Kidney	Kidney	Kidney	Outlier
SAMEA7629271	PRJEB41970	PAIRED	ILLUMINA	Illumina NovaSeq 6000	Sus scrofa	Large white	Unknown	Unknown	Unknown	Unknown	101560885	95932016	0.9446	21321	0.668202	Hind brain	Brain	Hind brain	Outlier
SAMEA7629272	PRJEB41970	PAIRED	ILLUMINA	Illumina NovaSeq 6000	Sus scrofa	Large white	Yorkshire	European pigs	Unknown	Unknown	113004598	106938623	0.9463	21155	0.663	Skin	Skin	Skin
SAMEA7629273	PRJEB41970	PAIRED	ILLUMINA	Illumina NovaSeq 6000	Sus scrofa	Large white	Unknown	Unknown	Unknown	Unknown	102337603	95080713	0.9291	17733	0.555754	Liver	Liver	Liver	Outlier
SAMEA7629274	PRJEB41970	PAIRED	ILLUMINA	Illumina NovaSeq 6000	Sus scrofa	Large white	Unknown	Unknown	Unknown	Unknown	135316361	128696612	0.9511	21325	0.668328	Small intestine	Small intestine	Small intestine	Outlier
SAMEA7629275	PRJEB41970	PAIRED	ILLUMINA	Illumina NovaSeq 6000	Sus scrofa	Large white	Yorkshire	European pigs	Unknown	Unknown	111080388	104456819	0.9404	21765	0.682117	Lung	Lung	Lung
SAMEA7629276	PRJEB41970	PAIRED	ILLUMINA	Illumina NovaSeq 6000	Sus scrofa	Large white	Unknown	Unknown	Unknown	Unknown	109040291	103862530	0.9525	20729	0.649649	Embryonic muscle	Embryo	Embryo	Outlier
SAMEA7629277	PRJEB41970	PAIRED	ILLUMINA	Illumina NovaSeq 6000	Sus scrofa	Large white	Unknown	Unknown	Unknown	Unknown	104746738	98833730	0.9435	19154	0.600288	Kidney	Kidney	Kidney	Outlier
SAMEA7629278	PRJEB41970	PAIRED	ILLUMINA	Illumina NovaSeq 6000	Sus scrofa	Large white	Unknown	Unknown	Unknown	Unknown	133069192	125629714	0.9441	20944	0.656387	Hind brain	Brain	Hind brain	Outlier
SAMEA7629279	PRJEB41970	PAIRED	ILLUMINA	Illumina NovaSeq 6000	Sus scrofa	Large white	Yorkshire	European pigs	Unknown	Unknown	114297314	108061430	0.9454	21308	0.667795	Skin	Skin	Skin
SAMEA7629280	PRJEB41970	PAIRED	ILLUMINA	Illumina NovaSeq 6000	Sus scrofa	Large white	Unknown	Unknown	Unknown	Unknown	93442167	86362574	0.9242	17153	0.537577	Liver	Liver	Liver	Outlier
SAMEA7629281	PRJEB41970	PAIRED	ILLUMINA	Illumina NovaSeq 6000	Sus scrofa	Large white	Unknown	Unknown	Unknown	Unknown	214872422	204443625	0.9515	21521	0.67447	Small intestine	Small intestine	Small intestine	Outlier
SAMEA7629282	PRJEB41970	PAIRED	ILLUMINA	Illumina NovaSeq 6000	Sus scrofa	Large white	Yorkshire	European pigs	Unknown	Unknown	123831406	117215495	0.9466	22318	0.699448	Lung	Lung	Lung
SAMEA7629283	PRJEB41970	PAIRED	ILLUMINA	Illumina NovaSeq 6000	Sus scrofa	Large white	Unknown	Unknown	Unknown	Unknown	85028560	81143651	0.9543	21189	0.664065	Embryonic muscle	Embryo	Embryo	Outlier
SAMEA7629284	PRJEB41970	PAIRED	ILLUMINA	Illumina NovaSeq 6000	Sus scrofa	Large white	Unknown	Unknown	Unknown	Unknown	168620228	159629994	0.9467	19183	0.601197	Kidney	Kidney	Kidney	Outlier
SAMEA7629285	PRJEB41970	PAIRED	ILLUMINA	Illumina NovaSeq 6000	Sus scrofa	Large white	Unknown	Unknown	Unknown	Unknown	87609315	82850904	0.9457	21918	0.686912	Hind brain	Brain	Hind brain	Outlier
SAMEA7629286	PRJEB41970	PAIRED	ILLUMINA	Illumina NovaSeq 6000	Sus scrofa	Large white	Yorkshire	European pigs	Unknown	Unknown	189319431	179779985	0.9496	21314	0.667983	Skin	Skin	Skin
SAMEA2337675	PRJEB5250	SINGLE	ILLUMINA	Illumina HiScanSQ	Sus scrofa	Unknown	Unknown	Unknown	Unknown	Unknown	59998290	28566972	0.4761	11780	0.369186	Unknown	Unknown	Unknown
SAMEA2337676	PRJEB5250	SINGLE	ILLUMINA	Illumina HiScanSQ	Sus scrofa	Unknown	Landrace x Yorkshire	Cross	Unknown	Unknown	24737742	17666986	0.7142	12399	0.388586	Blood	Blood	Blood
SAMEA2337677	PRJEB5250	SINGLE	ILLUMINA	Illumina HiScanSQ	Sus scrofa	Unknown	Duroc x (Landrace x Yorkshire)	Cross	Unknown	Unknown	36812761	30786388	0.8363	13154	0.412248	Blood	Blood	Blood
SAMEA2337678	PRJEB5250	SINGLE	ILLUMINA	Illumina HiScanSQ	Sus scrofa	Unknown	Landrace x Yorkshire	Cross	Unknown	Unknown	36236038	28978702	0.7997	13264	0.415695	Blood	Blood	Blood
SAMEA2337679	PRJEB5250	SINGLE	ILLUMINA	Illumina HiScanSQ	Sus scrofa	Unknown	Unknown	Unknown	Unknown	Unknown	38619676	22523569	0.5832	12190	0.382036	Unknown	Unknown	Unknown
SAMEA2337680	PRJEB5250	SINGLE	ILLUMINA	Illumina HiScanSQ	Sus scrofa	Unknown	Landrace x Yorkshire	Cross	Unknown	Unknown	36630175	26232530	0.7161	13176	0.412937	Blood	Blood	Blood
SAMEA2337681	PRJEB5250	SINGLE	ILLUMINA	Illumina HiScanSQ	Sus scrofa	Unknown	Duroc x (Landrace x Yorkshire)	Cross	Unknown	Unknown	40101711	26935664	0.6717	13169	0.412718	Blood	Blood	Blood
SAMEA2337682	PRJEB5250	SINGLE	ILLUMINA	Illumina HiScanSQ	Sus scrofa	Unknown	Duroc x (Landrace x Yorkshire)	Cross	Unknown	Unknown	37780931	27247507	0.7212	13212	0.414065	Blood	Blood	Blood
SAMEA2337683	PRJEB5250	SINGLE	ILLUMINA	Illumina HiScanSQ	Sus scrofa	Unknown	Landrace x Yorkshire	Cross	Unknown	Unknown	44009407	31680006	0.7198	13276	0.416071	Blood	Blood	Blood
SAMEA2337684	PRJEB5250	SINGLE	ILLUMINA	Illumina HiScanSQ	Sus scrofa	Unknown	Unknown	Unknown	Unknown	Unknown	36219172	15563566	0.4297	9911	0.310612	Unknown	Unknown	Unknown
SAMEA2337685	PRJEB5250	SINGLE	ILLUMINA	Illumina HiScanSQ	Sus scrofa	Unknown	Unknown	Unknown	Unknown	Unknown	43076679	19251491	0.4469	10878	0.340918	Unknown	Unknown	Unknown
SAMEA2337686	PRJEB5250	SINGLE	ILLUMINA	Illumina HiScanSQ	Sus scrofa	Unknown	Landrace x Yorkshire	Cross	Unknown	Unknown	29619875	25253069	0.8526	13360	0.418704	Blood	Blood	Blood
SAMEA2337687	PRJEB5250	SINGLE	ILLUMINA	Illumina HiScanSQ	Sus scrofa	Unknown	Unknown	Unknown	Unknown	Unknown	34330894	18913154	0.5509	11667	0.365645	Unknown	Unknown	Unknown
SAMEA2337688	PRJEB5250	SINGLE	ILLUMINA	Illumina HiScanSQ	Sus scrofa	Unknown	Unknown	Unknown	Unknown	Unknown	56470319	25124989	0.4449	10780	0.337846	Unknown	Unknown	Unknown
SAMEA2337689	PRJEB5250	SINGLE	ILLUMINA	Illumina HiScanSQ	Sus scrofa	Unknown	Unknown	Unknown	Unknown	Unknown	54152502	29712534	0.5487	11745	0.36809	Unknown	Unknown	Unknown
SAMEA2337690	PRJEB5250	SINGLE	ILLUMINA	Illumina HiScanSQ	Sus scrofa	Unknown	Unknown	Unknown	Unknown	Unknown	47815178	28495747	0.596	12595	0.394729	Unknown	Unknown	Unknown
SAMEA2337691	PRJEB5250	SINGLE	ILLUMINA	Illumina HiScanSQ	Sus scrofa	Unknown	Landrace x Yorkshire	Cross	Unknown	Unknown	43135873	39056824	0.9054	13927	0.436474	Blood	Blood	Blood
SAMEA2337692	PRJEB5250	SINGLE	ILLUMINA	Illumina HiScanSQ	Sus scrofa	Unknown	Unknown	Unknown	Unknown	Unknown	40349806	20671095	0.5123	11164	0.349881	Unknown	Unknown	Unknown
SAMEA2337693	PRJEB5250	SINGLE	ILLUMINA	Illumina HiScanSQ	Sus scrofa	Unknown	Landrace x Yorkshire	Cross	Unknown	Unknown	33599578	26624021	0.7924	13517	0.423624	Blood	Blood	Blood
SAMEA2337694	PRJEB5250	SINGLE	ILLUMINA	Illumina HiScanSQ	Sus scrofa	Unknown	Unknown	Unknown	Unknown	Unknown	35182617	20348049	0.5784	12220	0.382976	Unknown	Unknown	Unknown
SAMEA2337695	PRJEB5250	SINGLE	ILLUMINA	Illumina HiScanSQ	Sus scrofa	Unknown	Unknown	Unknown	Unknown	Unknown	68149734	40140276	0.589	12537	0.392911	Unknown	Unknown	Unknown
SAMEA2337696	PRJEB5250	SINGLE	ILLUMINA	Illumina HiScanSQ	Sus scrofa	Unknown	Landrace x Yorkshire	Cross	Unknown	Unknown	44952015	32103168	0.7142	13833	0.433528	Blood	Blood	Blood
SAMEA2337697	PRJEB5250	SINGLE	ILLUMINA	Illumina HiScanSQ	Sus scrofa	Unknown	Landrace x Yorkshire	Cross	Unknown	Unknown	29128247	22802328	0.7828	12691	0.397737	Blood	Blood	Blood
SAMEA2337698	PRJEB5250	SINGLE	ILLUMINA	Illumina HiScanSQ	Sus scrofa	Unknown	Landrace x Yorkshire	Cross	Unknown	Unknown	40407764	32339733	0.8003	13377	0.419237	Blood	Blood	Blood
SAMEA2337699	PRJEB5250	SINGLE	ILLUMINA	Illumina HiScanSQ	Sus scrofa	Unknown	Landrace x Yorkshire	Cross	Unknown	Unknown	37599674	26771093	0.712	13252	0.415319	Blood	Blood	Blood
SAMEA2337700	PRJEB5250	SINGLE	ILLUMINA	Illumina HiScanSQ	Sus scrofa	Unknown	Duroc x (Landrace x Yorkshire)	Cross	Unknown	Unknown	38435024	30668007	0.7979	12754	0.399712	Blood	Blood	Blood
SAMEA2337701	PRJEB5250	SINGLE	ILLUMINA	Illumina HiScanSQ	Sus scrofa	Unknown	Landrace x Yorkshire	Cross	Unknown	Unknown	70170151	47822095	0.6815	14125	0.442679	Blood	Blood	Blood
SAMEA2337702	PRJEB5250	SINGLE	ILLUMINA	Illumina HiScanSQ	Sus scrofa	Unknown	Duroc x (Landrace x Yorkshire)	Cross	Unknown	Unknown	37345595	29781975	0.7975	13917	0.43616	Blood	Blood	Blood
SAMEA2337703	PRJEB5250	SINGLE	ILLUMINA	Illumina HiScanSQ	Sus scrofa	Unknown	Landrace x Yorkshire	Cross	Unknown	Unknown	39223448	26844909	0.6844	13014	0.40786	Blood	Blood	Blood
SAMEA2337704	PRJEB5250	SINGLE	ILLUMINA	Illumina HiScanSQ	Sus scrofa	Unknown	Landrace x Yorkshire	Cross	Unknown	Unknown	45717078	37468080	0.8196	13687	0.428952	Blood	Blood	Blood
SAMEA2337705	PRJEB5250	SINGLE	ILLUMINA	Illumina HiScanSQ	Sus scrofa	Unknown	Duroc x (Landrace x Yorkshire)	Cross	Unknown	Unknown	38515725	30668207	0.7963	13013	0.407829	Blood	Blood	Blood
SAMEA2337706	PRJEB5250	SINGLE	ILLUMINA	Illumina HiScanSQ	Sus scrofa	Unknown	Landrace x Yorkshire	Cross	Unknown	Unknown	47780303	42108468	0.8813	13884	0.435126	Blood	Blood	Blood
SAMEA2733017	PRJEB6653	SINGLE	ILLUMINA	Illumina HiSeq 2000	Sus scrofa	Unknown	Unknown	Unknown	Unknown	Unknown	36591748	35039523	0.9576	16049	0.502977	Unknown	Other	Other	Outlier
SAMEA2733018	PRJEB6653	SINGLE	ILLUMINA	Illumina HiSeq 2000	Sus scrofa	Unknown	Landrace x Yorkshire	Cross	Unknown	Unknown	38364587	35284149	0.9197	17432	0.546321	iPS	iPS	iPS
SAMEA2733019	PRJEB6653	SINGLE	ILLUMINA	Illumina HiSeq 2000	Sus scrofa	Unknown	Landrace x Yorkshire	Cross	Unknown	Unknown	29900175	20642364	0.6904	14524	0.455184	iPS	iPS	iPS
SAMEA2659145	PRJEB6754	PAIRED	ILLUMINA	Illumina HiSeq 2000	Sus scrofa	Unknown	Landrace x Yorkshire	Cross	Unknown	Unknown	67447279	64924790	0.9626	20666	0.647675	Trigeminal ganglia	Brain	Brain
SAMEA2659146	PRJEB6754	PAIRED	ILLUMINA	Illumina HiSeq 2000	Sus scrofa	Unknown	Landrace x Yorkshire	Cross	Unknown	Unknown	62018935	59492624	0.9593	20561	0.644384	Trigeminal ganglia	Brain	Brain
SAMEA2659147	PRJEB6754	PAIRED	ILLUMINA	Illumina HiSeq 2000	Sus scrofa	Unknown	Landrace x Yorkshire	Cross	Unknown	Unknown	68495076	65721258	0.9595	20668	0.647737	Trigeminal ganglia	Brain	Brain
SAMEA2659148	PRJEB6754	PAIRED	ILLUMINA	Illumina HiSeq 2000	Sus scrofa	Unknown	Landrace x Yorkshire	Cross	Unknown	Unknown	66971683	63987968	0.9554	20629	0.646515	Trigeminal ganglia	Brain	Brain
SAMEA2659149	PRJEB6754	PAIRED	ILLUMINA	Illumina HiSeq 2000	Sus scrofa	Unknown	Landrace x Yorkshire	Cross	Unknown	Unknown	74686124	71628194	0.9591	20984	0.657641	Trigeminal ganglia	Brain	Brain
SAMEA2659150	PRJEB6754	PAIRED	ILLUMINA	Illumina HiSeq 2000	Sus scrofa	Unknown	Landrace x Yorkshire	Cross	Unknown	Unknown	74227004	71634674	0.9651	21236	0.665538	Trigeminal ganglia	Brain	Brain
SAMEA2659151	PRJEB6754	PAIRED	ILLUMINA	Illumina HiSeq 2000	Sus scrofa	Unknown	Landrace x Yorkshire	Cross	Unknown	Unknown	64065746	61901816	0.9662	20781	0.651279	Trigeminal ganglia	Brain	Brain
SAMEA2659152	PRJEB6754	PAIRED	ILLUMINA	Illumina HiSeq 2000	Sus scrofa	Unknown	Landrace x Yorkshire	Cross	Unknown	Unknown	62417933	60352253	0.9669	20631	0.646578	Trigeminal ganglia	Brain	Brain
SAMEA2659153	PRJEB6754	PAIRED	ILLUMINA	Illumina HiSeq 2000	Sus scrofa	Unknown	Landrace x Yorkshire	Cross	Unknown	Unknown	58584889	56599967	0.9661	20393	0.639119	Trigeminal ganglia	Brain	Brain
SAMEA2781067	PRJEB7330	SINGLE	ILLUMINA	Illumina HiSeq 2000	Sus scrofa	Unknown	Yorkshire	European pigs	Male	Unknown	9339104	8591586	0.92	12217	0.382882	Muscle	Muscle	Muscle
SAMEA2781068	PRJEB7330	SINGLE	ILLUMINA	Illumina HiSeq 2000	Sus scrofa	Unknown	Yorkshire	European pigs	Male	Unknown	8237219	7544424	0.9159	11907	0.373167	Muscle	Muscle	Muscle
SAMEA2781069	PRJEB7330	SINGLE	ILLUMINA	Illumina HiSeq 2000	Sus scrofa	Unknown	Landrace x Yorkshire	Cross	Male	Unknown	9155202	8369744	0.9142	12195	0.382193	Muscle	Muscle	Muscle
SAMEA2781070	PRJEB7330	SINGLE	ILLUMINA	Illumina HiSeq 2000	Sus scrofa	Unknown	Yorkshire	European pigs	Male	Unknown	9271112	8480269	0.9147	11958	0.374765	Muscle	Muscle	Muscle
SAMEA2781071	PRJEB7330	SINGLE	ILLUMINA	Illumina HiSeq 2000	Sus scrofa	Unknown	Yorkshire	European pigs	Male	Unknown	7634672	6980357	0.9143	12206	0.382537	Muscle	Muscle	Muscle
SAMEA2781072	PRJEB7330	SINGLE	ILLUMINA	Illumina HiSeq 2000	Sus scrofa	Unknown	Yorkshire	European pigs	Male	Unknown	9209355	8443711	0.9169	12112	0.379591	Muscle	Muscle	Muscle
SAMEA3179989	PRJEB8085	PAIRED	ILLUMINA	Illumina HiSeq 2000	Sus scrofa	Unknown	Yucatan	American pigs	Unknown	Unknown	17256435	16526537	0.9577	15094	0.473048	Synovial membrane	Synovial membrane	Synovial membrane
SAMEA3179990	PRJEB8085	PAIRED	ILLUMINA	Illumina HiSeq 2000	Sus scrofa	Unknown	Yucatan	American pigs	Unknown	Unknown	17789705	16900094	0.95	14969	0.46913	Synovial membrane	Synovial membrane	Synovial membrane
SAMEA3179991	PRJEB8085	PAIRED	ILLUMINA	Illumina HiSeq 2000	Sus scrofa	Unknown	Yucatan	American pigs	Unknown	Unknown	10575589	9988036	0.9444	14176	0.444277	Synovial membrane	Synovial membrane	Synovial membrane
SAMEA3179992	PRJEB8085	PAIRED	ILLUMINA	Illumina HiSeq 2000	Sus scrofa	Unknown	Yucatan	American pigs	Unknown	Unknown	16354477	15698113	0.9599	15412	0.483014	Synovial membrane	Synovial membrane	Synovial membrane
SAMEA3179993	PRJEB8085	PAIRED	ILLUMINA	Illumina HiSeq 2000	Sus scrofa	Unknown	Yucatan	American pigs	Unknown	Unknown	14968068	14370734	0.9601	15425	0.483421	Synovial membrane	Synovial membrane	Synovial membrane
SAMEA3179994	PRJEB8085	PAIRED	ILLUMINA	Illumina HiSeq 2000	Sus scrofa	Unknown	Yucatan	American pigs	Unknown	Unknown	15355538	14591125	0.9502	14891	0.466685	Synovial membrane	Synovial membrane	Synovial membrane
SAMEA3179995	PRJEB8085	PAIRED	ILLUMINA	Illumina HiSeq 2000	Sus scrofa	Unknown	Yucatan	American pigs	Unknown	Unknown	14683620	14048482	0.9567	15164	0.475241	Synovial membrane	Synovial membrane	Synovial membrane
SAMEA3179996	PRJEB8085	PAIRED	ILLUMINA	Illumina HiSeq 2000	Sus scrofa	Unknown	Yucatan	American pigs	Unknown	Unknown	10802212	10293377	0.9529	14552	0.456061	Synovial membrane	Synovial membrane	Synovial membrane
SAMEA3179997	PRJEB8085	PAIRED	ILLUMINA	Illumina HiSeq 2000	Sus scrofa	Unknown	Yucatan	American pigs	Unknown	Unknown	10359297	9876379	0.9534	14623	0.458286	Synovial membrane	Synovial membrane	Synovial membrane
SAMEA3179998	PRJEB8085	PAIRED	ILLUMINA	Illumina HiSeq 2000	Sus scrofa	Unknown	Yucatan	American pigs	Unknown	Unknown	12646934	12097079	0.9565	14520	0.455058	Synovial membrane	Synovial membrane	Synovial membrane
SAMEA3179999	PRJEB8085	PAIRED	ILLUMINA	Illumina HiSeq 2000	Sus scrofa	Unknown	Yucatan	American pigs	Unknown	Unknown	18926240	18223222	0.9629	15276	0.478751	Synovial membrane	Synovial membrane	Synovial membrane
SAMEA3180000	PRJEB8085	PAIRED	ILLUMINA	Illumina HiSeq 2000	Sus scrofa	Unknown	Yucatan	American pigs	Unknown	Unknown	21371801	20499744	0.9592	15494	0.485584	Synovial membrane	Synovial membrane	Synovial membrane
SAMEA3180001	PRJEB8085	PAIRED	ILLUMINA	Illumina HiSeq 2000	Sus scrofa	Unknown	Yucatan	American pigs	Unknown	Unknown	11884032	11180409	0.9408	14773	0.462987	Synovial membrane	Synovial membrane	Synovial membrane
SAMEA3180002	PRJEB8085	PAIRED	ILLUMINA	Illumina HiSeq 2000	Sus scrofa	Unknown	Yucatan	American pigs	Unknown	Unknown	19649060	18887907	0.9613	15384	0.482136	Synovial membrane	Synovial membrane	Synovial membrane
SAMEA3180003	PRJEB8085	PAIRED	ILLUMINA	Illumina HiSeq 2000	Sus scrofa	Unknown	Yucatan	American pigs	Unknown	Unknown	10695060	10090442	0.9435	14661	0.459477	Synovial membrane	Synovial membrane	Synovial membrane
SAMEA3180004	PRJEB8085	PAIRED	ILLUMINA	Illumina HiSeq 2000	Sus scrofa	Unknown	Yucatan	American pigs	Unknown	Unknown	12651237	12177926	0.9626	14650	0.459133	Synovial membrane	Synovial membrane	Synovial membrane
SAMEA3180005	PRJEB8085	PAIRED	ILLUMINA	Illumina HiSeq 2000	Sus scrofa	Unknown	Yucatan	American pigs	Unknown	Unknown	11865438	11302406	0.9525	14704	0.460825	Synovial membrane	Synovial membrane	Synovial membrane
SAMEA3180006	PRJEB8085	PAIRED	ILLUMINA	Illumina HiSeq 2000	Sus scrofa	Unknown	Yucatan	American pigs	Unknown	Unknown	10897428	10434886	0.9576	14650	0.459133	Synovial membrane	Synovial membrane	Synovial membrane
SAMEA3180007	PRJEB8085	PAIRED	ILLUMINA	Illumina HiSeq 2000	Sus scrofa	Unknown	Yucatan	American pigs	Unknown	Unknown	7966890	7703310	0.9669	14033	0.439796	Synovial membrane	Synovial membrane	Synovial membrane
SAMEA3180008	PRJEB8085	PAIRED	ILLUMINA	Illumina HiSeq 2000	Sus scrofa	Unknown	Yucatan	American pigs	Unknown	Unknown	26732700	25715117	0.9619	15819	0.495769	Synovial membrane	Synovial membrane	Synovial membrane
SAMEA3180009	PRJEB8085	PAIRED	ILLUMINA	Illumina HiSeq 2000	Sus scrofa	Unknown	Yucatan	American pigs	Unknown	Unknown	15192576	14494072	0.954	15213	0.476777	Synovial membrane	Synovial membrane	Synovial membrane
SAMEA3180010	PRJEB8085	PAIRED	ILLUMINA	Illumina HiSeq 2000	Sus scrofa	Unknown	Yucatan	American pigs	Unknown	Unknown	10863692	10389760	0.9564	14461	0.453209	Synovial membrane	Synovial membrane	Synovial membrane
SAMEA3180011	PRJEB8085	PAIRED	ILLUMINA	Illumina HiSeq 2000	Sus scrofa	Unknown	Yucatan	American pigs	Unknown	Unknown	11435772	10913578	0.9543	14823	0.464554	Synovial membrane	Synovial membrane	Synovial membrane
SAMEA3180012	PRJEB8085	PAIRED	ILLUMINA	Illumina HiSeq 2000	Sus scrofa	Unknown	Yucatan	American pigs	Unknown	Unknown	18522203	17756899	0.9587	15626	0.48972	Synovial membrane	Synovial membrane	Synovial membrane
SAMEA3180013	PRJEB8085	PAIRED	ILLUMINA	Illumina HiSeq 2000	Sus scrofa	Unknown	Yucatan	American pigs	Unknown	Unknown	12407105	11839990	0.9543	14946	0.468409	Synovial membrane	Synovial membrane	Synovial membrane
SAMEA3180014	PRJEB8085	PAIRED	ILLUMINA	Illumina HiSeq 2000	Sus scrofa	Unknown	Yucatan	American pigs	Unknown	Unknown	21048653	20105694	0.9552	15496	0.485646	Synovial membrane	Synovial membrane	Synovial membrane
SAMEA3180015	PRJEB8085	PAIRED	ILLUMINA	Illumina HiSeq 2000	Sus scrofa	Unknown	Yucatan	American pigs	Unknown	Unknown	10583076	10062123	0.9508	14582	0.457001	Synovial membrane	Synovial membrane	Synovial membrane
SAMEA3180016	PRJEB8085	PAIRED	ILLUMINA	Illumina HiSeq 2000	Sus scrofa	Unknown	Yucatan	American pigs	Unknown	Unknown	13866834	13179382	0.9504	15220	0.476996	Synovial membrane	Synovial membrane	Synovial membrane
SAMEA3180017	PRJEB8085	PAIRED	ILLUMINA	Illumina HiSeq 2000	Sus scrofa	Unknown	Yucatan	American pigs	Unknown	Unknown	13527877	12937708	0.9564	14731	0.461671	Synovial membrane	Synovial membrane	Synovial membrane
SAMEA3180018	PRJEB8085	PAIRED	ILLUMINA	Illumina HiSeq 2000	Sus scrofa	Unknown	Yucatan	American pigs	Unknown	Unknown	10094536	9657576	0.9567	14427	0.452144	Synovial membrane	Synovial membrane	Synovial membrane
SAMEA3180019	PRJEB8085	PAIRED	ILLUMINA	Illumina HiSeq 2000	Sus scrofa	Unknown	Yucatan	American pigs	Unknown	Unknown	13959471	13360493	0.9571	14694	0.460511	Synovial membrane	Synovial membrane	Synovial membrane
SAMEA3180020	PRJEB8085	PAIRED	ILLUMINA	Illumina HiSeq 2000	Sus scrofa	Unknown	Yucatan	American pigs	Unknown	Unknown	12741097	12169555	0.9551	14505	0.454588	Synovial membrane	Synovial membrane	Synovial membrane
SAMEA3180021	PRJEB8085	PAIRED	ILLUMINA	Illumina HiSeq 2000	Sus scrofa	Unknown	Yucatan	American pigs	Unknown	Unknown	9225947	8876214	0.9621	14156	0.44365	Synovial membrane	Synovial membrane	Synovial membrane
SAMEA3180022	PRJEB8085	PAIRED	ILLUMINA	Illumina HiSeq 2000	Sus scrofa	Unknown	Yucatan	American pigs	Unknown	Unknown	39207009	37732335	0.9624	17014	0.533221	Synovial membrane	Synovial membrane	Synovial membrane
SAMEA3180023	PRJEB8085	PAIRED	ILLUMINA	Illumina HiSeq 2000	Sus scrofa	Unknown	Yucatan	American pigs	Unknown	Unknown	23824315	22830165	0.9583	16000	0.501442	Synovial membrane	Synovial membrane	Synovial membrane
SAMEA3180024	PRJEB8085	PAIRED	ILLUMINA	Illumina HiSeq 2000	Sus scrofa	Unknown	Yucatan	American pigs	Unknown	Unknown	17158930	16599234	0.9674	15290	0.47919	Synovial membrane	Synovial membrane	Synovial membrane
SAMEA4039832	PRJEB8646	PAIRED	ILLUMINA	Illumina HiSeq 2000	Sus scrofa	Unknown	Landrace x Yorkshire	Cross	Unknown	Unknown	25946401	23309499	0.8984	15777	0.494453	Hepatocytes	Liver	Liver
SAMEA4039833	PRJEB8646	PAIRED	ILLUMINA	Illumina HiSeq 2000	Sus scrofa	Unknown	Unknown	Unknown	Unknown	Unknown	28555187	26554970	0.93	15974	0.500627	Hepatocytes	Other	Other	Outlier
SAMEA4039834	PRJEB8646	PAIRED	ILLUMINA	Illumina HiSeq 2000	Sus scrofa	Unknown	Landrace x Yorkshire	Cross	Unknown	Unknown	27498753	24772188	0.9008	16435	0.515075	Hepatocytes	Liver	Liver
SAMEA4039835	PRJEB8646	PAIRED	ILLUMINA	Illumina HiSeq 2000	Sus scrofa	Unknown	Unknown	Unknown	Unknown	Unknown	29829599	27794685	0.9318	15472	0.484894	Hepatocytes	Other	Other	Outlier
SAMEA4039836	PRJEB8646	PAIRED	ILLUMINA	Illumina HiSeq 2000	Sus scrofa	Unknown	Landrace x Yorkshire	Cross	Unknown	Unknown	21375194	18515302	0.8662	15817	0.495706	Hepatocytes	Liver	Liver
SAMEA4039837	PRJEB8646	PAIRED	ILLUMINA	Illumina HiSeq 2000	Sus scrofa	Unknown	Unknown	Unknown	Unknown	Unknown	26835951	24945962	0.9296	15273	0.478657	Hepatocytes	Other	Other	Outlier
SAMEA4063093	PRJEB8646	PAIRED	ILLUMINA	Illumina HiSeq 2500	Sus scrofa	Unknown	Landrace x Yorkshire	Cross	Unknown	Unknown	29092056	27685983	0.9517	14811	0.464178	Fibroblast	Fibroblast	Fibroblast
SAMEA4063094	PRJEB8646	PAIRED	ILLUMINA	Illumina HiSeq 2500	Sus scrofa	Unknown	Landrace x Yorkshire	Cross	Unknown	Unknown	31564781	30069983	0.9526	15681	0.491444	Fibroblast	Fibroblast	Fibroblast
SAMEA4063095	PRJEB8646	PAIRED	ILLUMINA	Illumina HiSeq 2500	Sus scrofa	Unknown	Landrace x Yorkshire	Cross	Unknown	Unknown	37770449	35952997	0.9519	15474	0.484957	Fibroblast	Fibroblast	Fibroblast
SAMEA4063096	PRJEB8646	PAIRED	ILLUMINA	Illumina HiSeq 2500	Sus scrofa	Unknown	Landrace x Yorkshire	Cross	Unknown	Unknown	37334853	35042045	0.9386	15050	0.471669	Fibroblast	Fibroblast	Fibroblast
SAMEA4063097	PRJEB8646	PAIRED	ILLUMINA	Illumina HiSeq 2500	Sus scrofa	Unknown	Landrace x Yorkshire	Cross	Unknown	Unknown	34044359	32242869	0.9471	14932	0.46797	Fibroblast	Fibroblast	Fibroblast
SAMEA4063098	PRJEB8646	PAIRED	ILLUMINA	Illumina HiSeq 2500	Sus scrofa	Unknown	Landrace x Yorkshire	Cross	Unknown	Unknown	38384919	35935508	0.9362	15314	0.479942	Fibroblast	Fibroblast	Fibroblast
SAMEA4063099	PRJEB8646	PAIRED	ILLUMINA	Illumina HiSeq 2500	Sus scrofa	Unknown	Landrace x Yorkshire	Cross	Unknown	Unknown	38773809	36458196	0.9403	15249	0.477905	Fibroblast	Fibroblast	Fibroblast
SAMEA4063100	PRJEB8646	PAIRED	ILLUMINA	Illumina HiSeq 2500	Sus scrofa	Unknown	Landrace x Yorkshire	Cross	Unknown	Unknown	32984782	30863102	0.9357	14853	0.465495	Fibroblast	Fibroblast	Fibroblast
SAMEA4063101	PRJEB8646	PAIRED	ILLUMINA	Illumina HiSeq 2500	Sus scrofa	Unknown	Landrace x Yorkshire	Cross	Unknown	Unknown	30394090	29041194	0.9555	14665	0.459603	Fibroblast	Fibroblast	Fibroblast
SAMEA4063102	PRJEB8646	PAIRED	ILLUMINA	Illumina HiSeq 2500	Sus scrofa	Unknown	Landrace x Yorkshire	Cross	Unknown	Unknown	32752481	31112691	0.9499	15818	0.495738	Fibroblast	Fibroblast	Fibroblast
SAMEA4063103	PRJEB8646	PAIRED	ILLUMINA	Illumina HiSeq 2500	Sus scrofa	Unknown	Landrace x Yorkshire	Cross	Unknown	Unknown	31688581	29978734	0.946	15100	0.473236	Fibroblast	Fibroblast	Fibroblast
SAMEA4063104	PRJEB8646	PAIRED	ILLUMINA	Illumina HiSeq 2500	Sus scrofa	Unknown	Landrace x Yorkshire	Cross	Unknown	Unknown	36605182	34551456	0.9439	16148	0.50608	Fibroblast	Fibroblast	Fibroblast
SAMEA4063105	PRJEB8646	PAIRED	ILLUMINA	Illumina HiSeq 2500	Sus scrofa	Unknown	Landrace x Yorkshire	Cross	Unknown	Unknown	30468782	28681354	0.9413	15236	0.477498	Fibroblast	Fibroblast	Fibroblast
SAMEA3293593	PRJEB8735	PAIRED	ILLUMINA	Illumina HiSeq 2000	Sus scrofa	Unknown	Landrace x Yorkshire	Cross	Unknown	6 weeks	62549813	54594172	0.8728	18491	0.57951	Muscle	Muscle	Muscle
SAMEA3293594	PRJEB8735	PAIRED	ILLUMINA	Illumina HiSeq 2000	Sus scrofa	Unknown	Landrace x Yorkshire	Cross	Unknown	6 weeks	66032358	62807647	0.9512	17107	0.536135	Muscle	Muscle	Muscle
SAMEA3293595	PRJEB8735	PAIRED	ILLUMINA	Illumina HiSeq 2000	Sus scrofa	Unknown	Landrace x Yorkshire	Cross	Unknown	6 weeks	61070277	57756395	0.9457	16924	0.5304	Muscle	Muscle	Muscle
SAMEA3293596	PRJEB8735	PAIRED	ILLUMINA	Illumina HiSeq 2000	Sus scrofa	Unknown	Landrace x Yorkshire	Cross	Unknown	6 weeks	64275055	57404490	0.8931	19474	0.610317	Muscle	Muscle	Muscle
SAMEA3293597	PRJEB8735	PAIRED	ILLUMINA	Illumina HiSeq 2000	Sus scrofa	Unknown	Landrace x Yorkshire	Cross	Unknown	6 weeks	79482442	72374854	0.9106	19325	0.605647	Muscle	Muscle	Muscle
SAMEA3293598	PRJEB8735	PAIRED	ILLUMINA	Illumina HiSeq 2000	Sus scrofa	Unknown	Landrace x Yorkshire	Cross	Unknown	6 weeks	80082418	71895985	0.8978	19241	0.603015	Muscle	Muscle	Muscle
SAMEA3293599	PRJEB8735	PAIRED	ILLUMINA	Illumina HiSeq 2000	Sus scrofa	Unknown	Landrace x Yorkshire	Cross	Unknown	6 weeks	52116299	49226723	0.9446	17429	0.546227	Muscle	Muscle	Muscle
SAMEA3303525	PRJEB8784	PAIRED	ILLUMINA	Illumina HiSeq 2000	Sus scrofa	Unknown	Unknown	Unknown	Unknown	3 months	45140397	39707538	0.8796	18933	0.593362	Adipose	Adipose	Adipose	Embargoed
SAMEA3303526	PRJEB8784	PAIRED	ILLUMINA	Illumina HiSeq 2000	Sus scrofa	Unknown	Unknown	Unknown	Unknown	3 months	44880588	39696219	0.8845	17168	0.538047	Heart	Heart	Heart	Embargoed
SAMEA3303527	PRJEB8784	PAIRED	ILLUMINA	Illumina HiSeq 2000	Sus scrofa	Unknown	Unknown	Unknown	Unknown	3 months	45567478	40313504	0.8847	19278	0.604175	Kidney	Kidney	Kidney	Embargoed
SAMEA3303528	PRJEB8784	PAIRED	ILLUMINA	Illumina HiSeq 2000	Sus scrofa	Unknown	Unknown	Unknown	Unknown	3 months	50333518	43661802	0.8674	17514	0.548891	Liver	Liver	Liver	Embargoed
SAMEA3303529	PRJEB8784	PAIRED	ILLUMINA	Illumina HiSeq 2000	Sus scrofa	Unknown	Unknown	Unknown	Unknown	3 months	40121094	33070378	0.8243	19532	0.612135	Lung	Lung	Lung	Embargoed
SAMEA3303530	PRJEB8784	PAIRED	ILLUMINA	Illumina HiSeq 2000	Sus scrofa	Unknown	Unknown	Unknown	Unknown	3 months	40468724	27121443	0.6702	17476	0.5477	Lymph node	Other	Other	Embargoed
SAMEA3303531	PRJEB8784	PAIRED	ILLUMINA	Illumina HiSeq 2000	Sus scrofa	Unknown	Unknown	Unknown	Unknown	3 months	46283609	40672014	0.8788	15945	0.499718	Muscle	Muscle	Muscle	Embargoed
SAMEA3303532	PRJEB8784	PAIRED	ILLUMINA	Illumina HiSeq 2000	Sus scrofa	Unknown	Unknown	Unknown	Unknown	3 months	37468410	26883908	0.7175	18571	0.582017	Spleen	Spleen	Spleen	Embargoed
SAMEA3492637	PRJEB8784	PAIRED	ILLUMINA	Illumina HiSeq 2000	Sus scrofa	Unknown	Unknown	Unknown	Unknown	Unknown	36953933	35277000	0.9546	14871	0.466059	Liver	Liver	Liver	Embargoed
SAMEA3492638	PRJEB8784	PAIRED	ILLUMINA	Illumina HiSeq 2000	Sus scrofa	Unknown	Unknown	Unknown	Unknown	Unknown	29120800	25476176	0.8748	16532	0.518115	Spleen	Spleen	Spleen	Embargoed
SAMEA3492639	PRJEB8784	PAIRED	ILLUMINA	Illumina HiSeq 2000	Sus scrofa	Unknown	Unknown	Unknown	Unknown	Unknown	35173079	33963268	0.9656	13619	0.426821	Muscle	Muscle	Muscle	Embargoed
SAMEA3466663	PRJEB9690	PAIRED	ILLUMINA	Illumina HiSeq 2500	Sus scrofa	Landrace x Yorkshire	Duroc x Landrace/Yorkshire	Cross	Male	6 months	87373581	79249739	0.907	18340	0.574777	Heart	Heart	Heart
SAMEA3466664	PRJEB9690	PAIRED	ILLUMINA	Illumina HiSeq 2500	Sus scrofa	Landrace x Yorkshire	Duroc x Landrace/Yorkshire	Cross	Male	6 months	91001355	83482257	0.9174	18297	0.57343	Heart	Heart	Heart
SAMEA3466665	PRJEB9690	PAIRED	ILLUMINA	Illumina HiSeq 2500	Sus scrofa	Landrace x Yorkshire	Duroc x Landrace/Yorkshire	Cross	Male	6 months	99995040	88167069	0.8817	18462	0.578601	Heart	Heart	Heart
SAMEA3466666	PRJEB9690	PAIRED	ILLUMINA	Illumina HiSeq 2500	Sus scrofa	Landrace x Yorkshire	Landrace x Yorkshire	Cross	Male	6 months	88458698	75113170	0.8491	17914	0.561427	Heart	Heart	Heart
SAMEA3466667	PRJEB9690	PAIRED	ILLUMINA	Illumina HiSeq 2500	Sus scrofa	Landrace x Yorkshire	Landrace x Yorkshire	Cross	Male	6 months	101936608	91436797	0.897	18146	0.568698	Heart	Heart	Heart
SAMEA3466668	PRJEB9690	PAIRED	ILLUMINA	Illumina HiSeq 2500	Sus scrofa	Landrace x Yorkshire	Landrace x Yorkshire	Cross	Male	6 months	92206843	84507423	0.9165	16736	0.524508	Heart	Heart	Heart
SAMEA3466669	PRJEB9690	PAIRED	ILLUMINA	Illumina HiSeq 2500	Sus scrofa	Landrace x Yorkshire	Landrace x Yorkshire	Cross	Male	6 months	94601894	85337135	0.9021	16973	0.531936	Heart	Heart	Heart
SAMEA3466670	PRJEB9690	PAIRED	ILLUMINA	Illumina HiSeq 2500	Sus scrofa	Landrace x Yorkshire	Landrace x Yorkshire	Cross	Male	6 months	89898939	79462962	0.8839	18077	0.566535	Heart	Heart	Heart
SAMEA3483844	PRJEB9865	PAIRED	ILLUMINA	Illumina HiSeq 2000	Sus scrofa	Landrace x Yorkshire	Landrace x Yorkshire	Cross	Male	6 months	42394874	40654991	0.959	16489	0.516767	Artery	Artery	Artery
SAMEA3483845	PRJEB9865	PAIRED	ILLUMINA	Illumina HiSeq 2000	Sus scrofa	Landrace x Yorkshire	Landrace x Yorkshire	Cross	Male	6 months	38379211	37013024	0.9644	17073	0.53507	Artery	Artery	Artery
SAMEA3483846	PRJEB9865	PAIRED	ILLUMINA	Illumina HiSeq 2000	Sus scrofa	Landrace x Yorkshire	Landrace x Yorkshire	Cross	Male	6 months	30435438	29345066	0.9642	15778	0.494484	Artery	Artery	Artery
SAMEA3483847	PRJEB9865	PAIRED	ILLUMINA	Illumina HiSeq 2000	Sus scrofa	Landrace x Yorkshire	Landrace x Yorkshire	Cross	Male	6 months	36567924	35277688	0.9647	17686	0.554281	Artery	Artery	Artery
SAMEA3483848	PRJEB9865	PAIRED	ILLUMINA	Illumina HiSeq 2000	Sus scrofa	Landrace x Yorkshire	Landrace x Yorkshire	Cross	Male	6 months	38810797	37291500	0.9609	16696	0.523254	Artery	Artery	Artery
SAMEA3483849	PRJEB9865	PAIRED	ILLUMINA	Illumina HiSeq 2000	Sus scrofa	Landrace x Yorkshire	Landrace x Yorkshire	Cross	Male	6 months	36667612	35025689	0.9552	17030	0.533722	Artery	Artery	Artery
SAMEA3483850	PRJEB9865	PAIRED	ILLUMINA	Illumina HiSeq 2000	Sus scrofa	Landrace x Yorkshire	Landrace x Yorkshire	Cross	Male	6 months	35737805	34381907	0.9621	16179	0.507052	Artery	Artery	Artery
SAMEA3483851	PRJEB9865	PAIRED	ILLUMINA	Illumina HiSeq 2000	Sus scrofa	Landrace x Yorkshire	Landrace x Yorkshire	Cross	Male	6 months	41711657	40074312	0.9607	17042	0.534098	Artery	Artery	Artery
SAMEA3483852	PRJEB9865	PAIRED	ILLUMINA	Illumina HiSeq 2000	Sus scrofa	Landrace x Yorkshire	Landrace x Yorkshire	Cross	Male	6 months	37390878	35773487	0.9567	16424	0.51473	Artery	Artery	Artery
SAMEA3483853	PRJEB9865	PAIRED	ILLUMINA	Illumina HiSeq 2000	Sus scrofa	Landrace x Yorkshire	Landrace x Yorkshire	Cross	Male	6 months	37096266	35667993	0.9615	16281	0.510248	Artery	Artery	Artery
SAMEA3483854	PRJEB9865	PAIRED	ILLUMINA	Illumina HiSeq 2000	Sus scrofa	Landrace x Yorkshire	Landrace x Yorkshire	Cross	Male	6 months	32404555	31317736	0.9665	16160	0.506456	Artery	Artery	Artery
SAMEA3483855	PRJEB9865	PAIRED	ILLUMINA	Illumina HiSeq 2000	Sus scrofa	Landrace x Yorkshire	Landrace x Yorkshire	Cross	Male	6 months	37995583	36472751	0.9599	16445	0.515388	Artery	Artery	Artery
SAMEA3483856	PRJEB9865	PAIRED	ILLUMINA	Illumina HiSeq 2000	Sus scrofa	Landrace x Yorkshire	Landrace x Yorkshire	Cross	Male	6 months	33593272	32199697	0.9585	16374	0.513163	Artery	Artery	Artery
SAMEA3483857	PRJEB9865	PAIRED	ILLUMINA	Illumina HiSeq 2000	Sus scrofa	Landrace x Yorkshire	Landrace x Yorkshire	Cross	Male	6 months	41274587	39601735	0.9595	17415	0.545788	Artery	Artery	Artery
SAMEA3483858	PRJEB9865	PAIRED	ILLUMINA	Illumina HiSeq 2000	Sus scrofa	Landrace x Yorkshire	Landrace x Yorkshire	Cross	Male	6 months	34200942	32825056	0.9598	15613	0.489313	Artery	Artery	Artery
SAMEA3483859	PRJEB9865	PAIRED	ILLUMINA	Illumina HiSeq 2000	Sus scrofa	Landrace x Yorkshire	Landrace x Yorkshire	Cross	Male	6 months	33828812	32457099	0.9595	16964	0.531654	Artery	Artery	Artery
SAMEA3483860	PRJEB9865	PAIRED	ILLUMINA	Illumina HiSeq 2000	Sus scrofa	Landrace x Yorkshire	Landrace x Yorkshire	Cross	Male	6 months	39406348	37844273	0.9604	15946	0.499749	Artery	Artery	Artery
SAMEA3483861	PRJEB9865	PAIRED	ILLUMINA	Illumina HiSeq 2000	Sus scrofa	Landrace x Yorkshire	Landrace x Yorkshire	Cross	Male	6 months	33379615	32063901	0.9606	17296	0.542058	Artery	Artery	Artery
SAMEA3483862	PRJEB9865	PAIRED	ILLUMINA	Illumina HiSeq 2000	Sus scrofa	Landrace x Yorkshire	Landrace x Yorkshire	Cross	Male	6 months	31384777	30062954	0.9579	15896	0.498182	Artery	Artery	Artery
SAMEA3483863	PRJEB9865	PAIRED	ILLUMINA	Illumina HiSeq 2000	Sus scrofa	Landrace x Yorkshire	Landrace x Yorkshire	Cross	Male	6 months	38384968	36736735	0.9571	17246	0.540491	Artery	Artery	Artery
SAMN00008935	PRJNA120067	SINGLE	ILLUMINA	Illumina Genome Analyzer	Sus scrofa	Rongchang	Unknown	Unknown	Unknown	0 day	0	0	0	0	0	Unknown	Unknown	Unknown
SAMN00008936	PRJNA120067	SINGLE	ILLUMINA	Illumina Genome Analyzer	Sus scrofa	Rongchang	Unknown	Unknown	Unknown	0 day	0	0	0	0	0	Unknown	Unknown	Unknown
SAMN00008937	PRJNA120067	SINGLE	ILLUMINA	Illumina Genome Analyzer	Sus scrofa	Rongchang	Unknown	Unknown	Unknown	0 day	0	0	0	0	0	Unknown	Unknown	Unknown
SAMN00008938	PRJNA120067	SINGLE	ILLUMINA	Illumina Genome Analyzer	Sus scrofa	Rongchang	Unknown	Unknown	Unknown	0 day	0	0	0	0	0	Unknown	Unknown	Unknown
SAMN00008939	PRJNA120067	SINGLE	ILLUMINA	Illumina Genome Analyzer	Sus scrofa	Rongchang	Unknown	Unknown	Unknown	0 day	0	0	0	0	0	Unknown	Unknown	Unknown
SAMN00008940	PRJNA120067	SINGLE	ILLUMINA	Illumina Genome Analyzer	Sus scrofa	Rongchang	Unknown	Unknown	Unknown	0 day	0	0	0	0	0	Unknown	Unknown	Unknown
SAMN00008941	PRJNA120067	SINGLE	ILLUMINA	Illumina Genome Analyzer	Sus scrofa	Unknown	Unknown	Unknown	Unknown	1 day	0	0	0	0	0	Unknown	Unknown	Unknown
SAMN00008942	PRJNA120067	SINGLE	ILLUMINA	Illumina Genome Analyzer	Sus scrofa	Rongchang	Unknown	Unknown	Unknown	30 days	0	0	0	0	0	Unknown	Unknown	Unknown
SAMN00008943	PRJNA120067	SINGLE	ILLUMINA	Illumina Genome Analyzer	Sus scrofa	Rongchang	Unknown	Unknown	Unknown	120 days	4875601	308665	0.0633	509	0.0159521	Unknown	Unknown	Unknown
SAMN00008944	PRJNA120067	SINGLE	ILLUMINA	Illumina Genome Analyzer	Sus scrofa	Rongchang	Unknown	Unknown	Unknown	180 days	2398518	123162	0.0513	332	0.0104049	Unknown	Unknown	Unknown
SAMN00010819	PRJNA120321	SINGLE	ILLUMINA	Illumina Genome Analyzer	Sus scrofa	Unknown	Unknown	Unknown	Unknown	Unknown	0	0	0	0	0	Unknown	Unknown	Unknown
SAMN00010820	PRJNA120321	SINGLE	ILLUMINA	Illumina Genome Analyzer	Sus scrofa	Unknown	Unknown	Unknown	Unknown	Unknown	0	0	0	0	0	Unknown	Unknown	Unknown
SAMN00010821	PRJNA120321	SINGLE	ILLUMINA	Illumina Genome Analyzer	Sus scrofa	Unknown	Unknown	Unknown	Unknown	Unknown	0	0	0	0	0	Unknown	Unknown	Unknown
SAMN00010855	PRJNA122621	SINGLE	ILLUMINA	Illumina Genome Analyzer	Sus scrofa	Unknown	Unknown	Unknown	Unknown	Unknown	0	0	0	0	0	Unknown	Unknown	Unknown
SAMN00010856	PRJNA122621	SINGLE	ILLUMINA	Illumina Genome Analyzer	Sus scrofa	Unknown	Unknown	Unknown	Unknown	Unknown	0	0	0	0	0	Unknown	Unknown	Unknown
SAMN00113716	PRJNA132681	SINGLE	ILLUMINA	Illumina Genome Analyzer	Sus scrofa	Tibetan	Unknown	Unknown	Female	210 days	15215483	659211	0.0433	1330	0.0416823	Unknown	Unknown	Unknown
SAMN00113717	PRJNA132681	SINGLE	ILLUMINA	Illumina Genome Analyzer	Sus scrofa	Tibetan	Unknown	Unknown	Male	210 days	16592713	3887766	0.2343	5493	0.172151	Unknown	Unknown	Unknown
SAMN00253849	PRJNA139519	SINGLE	ILLUMINA	Illumina Genome Analyzer	Sus scrofa	Junmu No.1 White	Unknown	Unknown	Male	30 days	0	0	0	0	0	Unknown	Testis	Testis
SAMN00253850	PRJNA139519	SINGLE	ILLUMINA	Illumina Genome Analyzer	Sus scrofa	Junmu No.1 White	Unknown	Unknown	Male	30 days	0	0	0	0	0	Unknown	Testis	Testis
SAMN00632017	PRJNA143621	SINGLE	ILLUMINA	Illumina Genome Analyzer II	Sus scrofa	Landrace	Unknown	Unknown	Female	210 days	15512296	666337	0.043	1216	0.0381096	Unknown	Unknown	Unknown
SAMN00632018	PRJNA143621	SINGLE	ILLUMINA	Illumina Genome Analyzer II	Sus scrofa	Landrace	Unknown	Unknown	Female	210 days	15774194	332774	0.0211	1237	0.0387677	Unknown	Unknown	Unknown
SAMN00632019	PRJNA143621	SINGLE	ILLUMINA	Illumina Genome Analyzer II	Sus scrofa	Landrace	Unknown	Unknown	Female	210 days	28153956	503102	0.0179	1944	0.0609252	Unknown	Unknown	Unknown
SAMN00632020	PRJNA143621	SINGLE	ILLUMINA	Illumina Genome Analyzer II	Sus scrofa	Landrace	Unknown	Unknown	Female	210 days	15856563	516631	0.0326	1296	0.0406168	Unknown	Unknown	Unknown
SAMN00632021	PRJNA143621	SINGLE	ILLUMINA	Illumina Genome Analyzer II	Sus scrofa	Landrace	Unknown	Unknown	Female	210 days	14648616	356821	0.0244	1222	0.0382976	Unknown	Unknown	Unknown
SAMN00632022	PRJNA143621	SINGLE	ILLUMINA	Illumina Genome Analyzer II	Sus scrofa	Landrace	Unknown	Unknown	Female	210 days	25866167	466762	0.018	2199	0.0689169	Unknown	Unknown	Unknown
SAMN00632023	PRJNA143621	SINGLE	ILLUMINA	Illumina Genome Analyzer II	Sus scrofa	Landrace	Unknown	Unknown	Female	210 days	13864232	430513	0.0311	1817	0.056945	Unknown	Unknown	Unknown
SAMN00632024	PRJNA143621	SINGLE	ILLUMINA	Illumina Genome Analyzer II	Sus scrofa	Landrace	Unknown	Unknown	Female	210 days	14375443	397174	0.0276	1589	0.0497994	Unknown	Unknown	Unknown
SAMN00632025	PRJNA143621	SINGLE	ILLUMINA	Illumina Genome Analyzer II	Sus scrofa	Landrace	Unknown	Unknown	Female	210 days	14713841	1211626	0.0823	643	0.0201517	Unknown	Unknown	Unknown
SAMN00632026	PRJNA143621	SINGLE	ILLUMINA	Illumina Genome Analyzer II	Sus scrofa	Landrace	Unknown	Unknown	Female	210 days	16295622	987086	0.0606	636	0.0199323	Unknown	Unknown	Unknown
SAMN00632027	PRJNA143621	SINGLE	ILLUMINA	Illumina Genome Analyzer II	Sus scrofa	Landrace	Unknown	Unknown	Female	210 days	20387585	1197168	0.0587	1882	0.0589821	Unknown	Unknown	Unknown
SAMN00723066	PRJNA147357	SINGLE	ILLUMINA	Illumina Genome Analyzer	Sus scrofa	Sutai	Unknown	Unknown	Unknown	Unknown	19308914	1838590	0.0952	1837	0.0575718	Unknown	Unknown	Unknown
SAMN00723067	PRJNA147357	SINGLE	ILLUMINA	Illumina Genome Analyzer	Sus scrofa	Sutai	Unknown	Unknown	Unknown	Unknown	15869428	3110596	0.196	4565	0.143068	Unknown	Unknown	Unknown
SAMN00723068	PRJNA147357	SINGLE	ILLUMINA	Illumina Genome Analyzer	Sus scrofa	Sutai	Unknown	Unknown	Unknown	Unknown	19998932	5008385	0.2504	4275	0.133979	Unknown	Unknown	Unknown
SAMN00723069	PRJNA147357	SINGLE	ILLUMINA	Illumina Genome Analyzer	Sus scrofa	Sutai	Unknown	Unknown	Unknown	Unknown	22599700	4819378	0.2132	3942	0.123543	Unknown	Unknown	Unknown
SAMN00723070	PRJNA147357	SINGLE	ILLUMINA	Illumina Genome Analyzer	Sus scrofa	Sutai	Unknown	Unknown	Unknown	Unknown	22429395	2401800	0.1071	5145	0.161245	Unknown	Unknown	Unknown
SAMN00723071	PRJNA147357	SINGLE	ILLUMINA	Illumina Genome Analyzer	Sus scrofa	Sutai	Unknown	Unknown	Unknown	Unknown	23064239	2538457	0.1101	2843	0.0890999	Unknown	Unknown	Unknown
SAMN00768986	PRJNA150399	SINGLE	ILLUMINA	Illumina Genome Analyzer IIx	Sus scrofa	Unknown	Unknown	Unknown	Unknown	Unknown	7937025	4550030	0.5733	496	0.0155447	Unknown	Unknown	Unknown
SAMN00768987	PRJNA150399	SINGLE	ILLUMINA	Illumina Genome Analyzer IIx	Sus scrofa	Unknown	Unknown	Unknown	Unknown	Unknown	7930169	3047605	0.3843	620	0.0194309	Unknown	Unknown	Unknown
SAMN00768988	PRJNA150399	SINGLE	ILLUMINA	Illumina Genome Analyzer IIx	Sus scrofa	Unknown	Unknown	Unknown	Unknown	Unknown	18600118	3606467	0.1939	716	0.0224395	Unknown	Unknown	Unknown
SAMN00768989	PRJNA150399	SINGLE	ILLUMINA	Illumina Genome Analyzer IIx	Sus scrofa	Unknown	Unknown	Unknown	Unknown	Unknown	22712897	3755041	0.1653	784	0.0245706	Unknown	Unknown	Unknown
SAMN00792918	PRJNA152995	SINGLE	ILLUMINA	Illumina Genome Analyzer II	Sus scrofa	Unknown	Landrace x Yorkshire	Cross	Unknown	Unknown	62801254	59543602	0.9481	14985	0.469631	iPS	iPS	iPS
SAMN00828961	PRJNA153761	SINGLE	ILLUMINA	Illumina Genome Analyzer II	Sus scrofa	Unknown	Unknown	Unknown	Female	0 day	4507164	23846	0.0053	313	0.00980945	Unknown	Unknown	Unknown
SAMN00828962	PRJNA153761	SINGLE	ILLUMINA	Illumina Genome Analyzer II	Sus scrofa	Unknown	Unknown	Unknown	Female	0 day	6150158	43593	0.0071	428	0.0134136	Unknown	Unknown	Unknown
SAMN00828963	PRJNA153761	SINGLE	ILLUMINA	Illumina Genome Analyzer II	Sus scrofa	Unknown	Unknown	Unknown	Female	0 day	12427296	435372	0.035	396	0.0124107	Unknown	Unknown	Unknown
SAMN00828964	PRJNA153761	SINGLE	ILLUMINA	Illumina Genome Analyzer II	Sus scrofa	Unknown	Unknown	Unknown	Female	3 days	2981469	16832	0.0056	216	0.00676946	Unknown	Unknown	Unknown
SAMN00828965	PRJNA153761	SINGLE	ILLUMINA	Illumina Genome Analyzer II	Sus scrofa	Unknown	Unknown	Unknown	Female	7 days	7115871	17340	0.0024	248	0.00777235	Unknown	Unknown	Unknown
SAMN00828966	PRJNA153761	SINGLE	ILLUMINA	Illumina Genome Analyzer II	Sus scrofa	Unknown	Unknown	Unknown	Female	14 days	3501519	18849	0.0054	341	0.010687	Unknown	Unknown	Unknown
SAMN00828967	PRJNA153761	SINGLE	ILLUMINA	Illumina Genome Analyzer II	Sus scrofa	Unknown	Unknown	Unknown	Female	21 days	8291616	48581	0.0059	322	0.0100915	Unknown	Unknown	Unknown
SAMN00828968	PRJNA153761	SINGLE	ILLUMINA	Illumina Genome Analyzer II	Sus scrofa	Unknown	Unknown	Unknown	Female	28 days	7133582	49866	0.007	431	0.0135076	Unknown	Unknown	Unknown
SAMN01036903	PRJNA168072	SINGLE	ILLUMINA	Illumina HiSeq 2000	Sus scrofa domesticus	Unknown	Landrace x Yorkshire	Cross	Unknown	Unknown	6377104	6107589	0.9577	12220	0.382976	Liver	Liver	Liver
SAMN01036904	PRJNA168072	SINGLE	ILLUMINA	Illumina HiSeq 2000	Sus scrofa domesticus	Unknown	Iberian x Landrace	Cross	Unknown	Unknown	7709316	7344727	0.9527	12427	0.389463	Liver	Liver	Liver
SAMN01036905	PRJNA168072	SINGLE	ILLUMINA	Illumina HiSeq 2000	Sus scrofa domesticus	Unknown	Iberian x Landrace	Cross	Unknown	Unknown	9271374	8801605	0.9493	12578	0.394196	Liver	Liver	Liver
SAMN01036906	PRJNA168072	SINGLE	ILLUMINA	Illumina HiSeq 2000	Sus scrofa domesticus	Unknown	Landrace x Yorkshire	Cross	Unknown	Unknown	4922260	4682668	0.9513	10353	0.324464	Liver	Liver	Liver
SAMN01036907	PRJNA168072	SINGLE	ILLUMINA	Illumina HiSeq 2000	Sus scrofa domesticus	Unknown	Unknown	Unknown	Unknown	Unknown	4832616	4659476	0.9642	8949	0.280463	Liver	Liver	Liver
SAMN01036908	PRJNA168072	SINGLE	ILLUMINA	Illumina HiSeq 2000	Sus scrofa domesticus	Unknown	Iberian x Landrace	Cross	Unknown	Unknown	10828791	10383323	0.9589	12820	0.40178	Liver	Liver	Liver
SAMN01036909	PRJNA168072	SINGLE	ILLUMINA	Illumina HiSeq 2000	Sus scrofa domesticus	Unknown	Iberian x Landrace	Cross	Unknown	Unknown	8548454	8174134	0.9562	12698	0.397957	Liver	Liver	Liver
SAMN01036910	PRJNA168072	SINGLE	ILLUMINA	Illumina HiSeq 2000	Sus scrofa domesticus	Unknown	Landrace x Yorkshire	Cross	Unknown	Unknown	9322395	8955139	0.9606	13126	0.41137	Liver	Liver	Liver
SAMN01036911	PRJNA168072	SINGLE	ILLUMINA	Illumina HiSeq 2000	Sus scrofa domesticus	Unknown	Landrace x Yorkshire	Cross	Unknown	Unknown	10079476	9634783	0.9559	12273	0.384637	Liver	Liver	Liver
SAMN01036912	PRJNA168072	SINGLE	ILLUMINA	Illumina HiSeq 2000	Sus scrofa domesticus	Unknown	Iberian x Landrace	Cross	Unknown	Unknown	11407002	10960525	0.9609	12911	0.404632	Liver	Liver	Liver
SAMN01120728	PRJNA173041	PAIRED	ILLUMINA	Illumina Genome Analyzer IIx	Sus scrofa	Wild boar	Wild boar	Wild boar	Unknown	Unknown	8431298	7122966	0.8448	18062	0.566065	Testis	Testis	Testis
SAMN01120729	PRJNA173041	PAIRED	ILLUMINA	Illumina Genome Analyzer IIx	Sus scrofa	Unknown	Duroc x (Landrace x Yorkshire)	Cross	Unknown	Unknown	10436457	9808034	0.9398	14028	0.439639	Placenta	Placenta	Placenta
SAMN01120730	PRJNA173041	PAIRED	ILLUMINA	Illumina Genome Analyzer IIx	Sus scrofa	Unknown	Unknown	Unknown	Unknown	Unknown	61591294	33283263	0.5404	17788	0.557478	Unknown	Unknown	Unknown
SAMN01120960	PRJNA173135	PAIRED	ILLUMINA	Illumina Genome Analyzer IIx	Sus scrofa	Unknown	Unknown	Unknown	Unknown	Unknown	0	0	0	0	0	Unknown	Unknown	Unknown
SAMN01121009	PRJNA173135	SINGLE	ILLUMINA	Illumina Genome Analyzer II	Sus scrofa domesticus	Unknown	Landrace x Yorkshire	Cross	Unknown	Unknown	21923525	14179651	0.6468	14072	0.441018	Macrophage	Blood	Macrophage
SAMN01121012	PRJNA173135	SINGLE	ILLUMINA	Illumina Genome Analyzer II	Sus scrofa domesticus	Unknown	Unknown	Unknown	Unknown	Unknown	21718096	12875357	0.5928	13522	0.423781	Unknown	Unknown	Unknown
SAMN01766975	PRJNA177810	SINGLE	ILLUMINA	Illumina Genome Analyzer IIx	Sus scrofa	Bama Xiang	Bama Xiang	Asian pigs	Unknown	Unknown	358189134	219826215	0.6137	17082	0.535352	Liver	Liver	Liver
SAMN01831898	PRJNA184055	PAIRED	ILLUMINA	Illumina Genome Analyzer IIx	Sus scrofa	Unknown	Landrace x Yorkshire	Cross	Unknown	Unknown	14984672	14017875	0.9355	15613	0.489313	Liver	Liver	Liver
SAMN01831899	PRJNA184055	PAIRED	ILLUMINA	Illumina Genome Analyzer IIx	Sus scrofa	Unknown	Landrace x Yorkshire	Cross	Unknown	Unknown	14244906	13316480	0.9348	15611	0.48925	Liver	Liver	Liver
SAMN01831945	PRJNA184055	PAIRED	ILLUMINA	Illumina Genome Analyzer IIx	Sus scrofa	Unknown	Landrace x Yorkshire	Cross	Unknown	Unknown	14006427	12883495	0.9198	16195	0.507553	Kidney	Kidney	Kidney
SAMN01831946	PRJNA184055	PAIRED	ILLUMINA	Illumina Genome Analyzer IIx	Sus scrofa	Unknown	Landrace x Yorkshire	Cross	Unknown	Unknown	16069128	14785313	0.9201	16925	0.530431	Kidney	Kidney	Kidney
SAMN01831990	PRJNA184055	PAIRED	ILLUMINA	Illumina Genome Analyzer IIx	Sus scrofa	Unknown	Landrace x Yorkshire	Cross	Unknown	Unknown	14983371	14228837	0.9496	18253	0.572051	Brain	Brain	Brain
SAMN01831991	PRJNA184055	PAIRED	ILLUMINA	Illumina Genome Analyzer IIx	Sus scrofa	Unknown	Landrace x Yorkshire	Cross	Unknown	Unknown	29432567	27740303	0.9425	18743	0.587408	Brain	Brain	Brain
SAMN01893934	PRJNA186961	SINGLE	ILLUMINA	Illumina Genome Analyzer IIx	Sus scrofa	Landrace	Landrace x Yorkshire	Cross	Female	Unknown	16646203	15298954	0.9191	17169	0.538078	Uterus	Uterus	Uterus
SAMN01893935	PRJNA186961	SINGLE	ILLUMINA	Illumina Genome Analyzer IIx	Sus scrofa	Landrace	Landrace x Yorkshire	Cross	Female	Unknown	19680393	18355676	0.9327	17739	0.555942	Uterus	Uterus	Uterus
SAMN01893936	PRJNA186961	SINGLE	ILLUMINA	Illumina Genome Analyzer IIx	Sus scrofa	Landrace	Landrace x Yorkshire	Cross	Female	Unknown	20946825	18838643	0.8994	18003	0.564216	Uterus	Uterus	Uterus
SAMN01893937	PRJNA186961	SINGLE	ILLUMINA	Illumina Genome Analyzer IIx	Sus scrofa	Landrace	Landrace x Yorkshire	Cross	Female	Unknown	19166424	17830124	0.9303	17704	0.554845	Uterus	Uterus	Uterus
SAMN01893938	PRJNA186961	SINGLE	ILLUMINA	Illumina Genome Analyzer IIx	Sus scrofa	Landrace	Landrace x Yorkshire	Cross	Female	Unknown	19760178	17721872	0.8968	17970	0.563182	Uterus	Uterus	Uterus
SAMN01893939	PRJNA186961	SINGLE	ILLUMINA	Illumina Genome Analyzer IIx	Sus scrofa	Landrace	Landrace x Yorkshire	Cross	Female	Unknown	25253009	22968980	0.9096	18157	0.569042	Uterus	Uterus	Uterus
SAMN01893940	PRJNA186961	SINGLE	ILLUMINA	Illumina Genome Analyzer IIx	Sus scrofa	Landrace	Landrace x Yorkshire	Cross	Female	Unknown	15166582	13476431	0.8886	17556	0.550207	Uterus	Uterus	Uterus
SAMN01893941	PRJNA186961	SINGLE	ILLUMINA	Illumina Genome Analyzer IIx	Sus scrofa	Landrace	Landrace x Yorkshire	Cross	Female	Unknown	15340012	14213941	0.9266	17763	0.556694	Uterus	Uterus	Uterus
SAMN01907293	PRJNA188070	PAIRED	ILLUMINA	Illumina HiSeq 2000	Sus scrofa	Tibetan	Tibetan	Asian pigs	Unknown	Unknown	49692417	46524207	0.9362	16018	0.502006	Heart	Heart	Heart
SAMN01907294	PRJNA188070	PAIRED	ILLUMINA	Illumina HiSeq 2000	Sus scrofa	Tibetan	Tibetan	Asian pigs	Unknown	Unknown	8764807	7993857	0.912	14583	0.457033	Liver	Liver	Liver
SAMN01907295	PRJNA188070	PAIRED	ILLUMINA	Illumina HiSeq 2000	Sus scrofa	Tibetan	Tibetan	Asian pigs	Unknown	Unknown	16467141	12968294	0.7875	18552	0.581422	Lung	Lung	Lung
SAMN01907296	PRJNA188070	PAIRED	ILLUMINA	Illumina HiSeq 2000	Sus scrofa	Tibetan	Tibetan	Asian pigs	Unknown	Unknown	13844652	12862979	0.9291	16617	0.520778	Kidney	Kidney	Kidney
SAMN01915391	PRJNA188941	SINGLE	ILLUMINA	Illumina HiSeq 2000	Sus scrofa	Duroc x (Leicoma x German Landrace)	Landrace x Yorkshire	Cross	Unknown	116 days	14596954	12665758	0.8677	17579	0.550928	Testis	Testis	Testis
SAMN01915392	PRJNA188941	SINGLE	ILLUMINA	Illumina HiSeq 2000	Sus scrofa	Duroc x (Leicoma x German Landrace)	Duroc x (Leicoma x German Landrace)	Cross	Unknown	116 days	12787232	10805330	0.845	17744	0.556099	Testis	Testis	Testis
SAMN01915393	PRJNA188941	SINGLE	ILLUMINA	Illumina HiSeq 2000	Sus scrofa	Duroc x (Leicoma x German Landrace)	Duroc x (Leicoma x German Landrace)	Cross	Unknown	116 days	28568758	26893702	0.9414	18575	0.582142	Testis	Testis	Testis
SAMN01915394	PRJNA188941	SINGLE	ILLUMINA	Illumina HiSeq 2000	Sus scrofa	Duroc x (Leicoma x German Landrace)	Duroc x (Leicoma x German Landrace)	Cross	Unknown	116 days	23796550	22280390	0.9363	18638	0.584117	Testis	Testis	Testis
SAMN01915395	PRJNA188941	SINGLE	ILLUMINA	Illumina HiSeq 2000	Sus scrofa	Duroc x (Leicoma x German Landrace)	Duroc x (Leicoma x German Landrace)	Cross	Unknown	116 days	23884130	20842909	0.8727	17794	0.557666	Testis	Testis	Testis
SAMN01915396	PRJNA188941	SINGLE	ILLUMINA	Illumina HiSeq 2000	Sus scrofa	Duroc x (Leicoma x German Landrace)	Duroc x (Leicoma x German Landrace)	Cross	Unknown	116 days	27273408	24764966	0.908	19652	0.615896	Testis	Testis	Testis
SAMN01915397	PRJNA188941	SINGLE	ILLUMINA	Illumina HiSeq 2000	Sus scrofa	Duroc x (Leicoma x German Landrace)	Duroc x (Leicoma x German Landrace)	Cross	Unknown	116 days	29389211	27570841	0.9381	18840	0.590448	Testis	Testis	Testis
SAMN01915398	PRJNA188941	SINGLE	ILLUMINA	Illumina HiSeq 2000	Sus scrofa	Duroc x (Leicoma x German Landrace)	Duroc x (Leicoma x German Landrace)	Cross	Unknown	116 days	14210808	12615195	0.8877	17586	0.551147	Testis	Testis	Testis
SAMN01915399	PRJNA188941	SINGLE	ILLUMINA	Illumina HiSeq 2000	Sus scrofa	Duroc x (Leicoma x German Landrace)	Duroc x (Leicoma x German Landrace)	Cross	Unknown	116 days	12439785	11036685	0.8872	17191	0.538768	Testis	Testis	Testis
SAMN01915400	PRJNA188941	SINGLE	ILLUMINA	Illumina HiSeq 2000	Sus scrofa	Duroc x (Leicoma x German Landrace)	Duroc x (Leicoma x German Landrace)	Cross	Unknown	116 days	14947405	12963010	0.8672	17893	0.560768	Testis	Testis	Testis
SAMN01915401	PRJNA188941	SINGLE	ILLUMINA	Illumina HiSeq 2000	Sus scrofa	Duroc x (Leicoma x German Landrace)	Landrace x Yorkshire	Cross	Unknown	116 days	22957586	20225033	0.881	15763	0.494014	Liver	Liver	Liver
SAMN01915402	PRJNA188941	SINGLE	ILLUMINA	Illumina HiSeq 2000	Sus scrofa	Duroc x (Leicoma x German Landrace)	Duroc x (Leicoma x German Landrace)	Cross	Unknown	116 days	34899131	30459153	0.8728	15519	0.486367	Liver	Liver	Liver
SAMN01915403	PRJNA188941	SINGLE	ILLUMINA	Illumina HiSeq 2000	Sus scrofa	Duroc x (Leicoma x German Landrace)	Duroc x (Leicoma x German Landrace)	Cross	Unknown	116 days	15085662	12910127	0.8558	14002	0.438824	Liver	Liver	Liver
SAMN01915404	PRJNA188941	SINGLE	ILLUMINA	Illumina HiSeq 2000	Sus scrofa	Duroc x (Leicoma x German Landrace)	Duroc x (Leicoma x German Landrace)	Cross	Unknown	116 days	12525947	10669295	0.8518	15130	0.474176	Liver	Liver	Liver
SAMN01915405	PRJNA188941	SINGLE	ILLUMINA	Illumina HiSeq 2000	Sus scrofa	Duroc x (Leicoma x German Landrace)	Duroc x (Leicoma x German Landrace)	Cross	Unknown	116 days	23387275	21809167	0.9325	14154	0.443588	Liver	Liver	Liver
SAMN01915406	PRJNA188941	SINGLE	ILLUMINA	Illumina HiSeq 2000	Sus scrofa	Duroc x (Leicoma x German Landrace)	Duroc x (Leicoma x German Landrace)	Cross	Unknown	116 days	23470116	21475258	0.915	16149	0.506111	Liver	Liver	Liver
SAMN01915407	PRJNA188941	SINGLE	ILLUMINA	Illumina HiSeq 2000	Sus scrofa	Duroc x (Leicoma x German Landrace)	Duroc x (Leicoma x German Landrace)	Cross	Unknown	116 days	12006677	10131129	0.8438	13398	0.419895	Liver	Liver	Liver
SAMN01915408	PRJNA188941	SINGLE	ILLUMINA	Illumina HiSeq 2000	Sus scrofa	Duroc x (Leicoma x German Landrace)	Duroc x (Leicoma x German Landrace)	Cross	Unknown	116 days	39930705	37694491	0.944	13690	0.429046	Liver	Liver	Liver
SAMN01915409	PRJNA188941	SINGLE	ILLUMINA	Illumina HiSeq 2000	Sus scrofa	Duroc x (Leicoma x German Landrace)	Duroc x (Leicoma x German Landrace)	Cross	Unknown	116 days	13427642	10054119	0.7488	15024	0.470854	Liver	Liver	Liver
SAMN01915410	PRJNA188941	SINGLE	ILLUMINA	Illumina HiSeq 2000	Sus scrofa	Duroc x (Leicoma x German Landrace)	Duroc x (Leicoma x German Landrace)	Cross	Unknown	116 days	13132297	10185097	0.7756	14584	0.457064	Liver	Liver	Liver
SAMN01923455	PRJNA189967	SINGLE	ILLUMINA	Illumina HiScanSQ	Sus scrofa	Unknown	Duroc x (Landrace x Yorkshire)	Cross	Unknown	Unknown	28924529	25209277	0.8716	14240	0.446283	Blood	Blood	Blood
SAMN01923456	PRJNA189967	SINGLE	ILLUMINA	Illumina HiScanSQ	Sus scrofa	Unknown	Duroc x (Landrace x Yorkshire)	Cross	Unknown	Unknown	22874476	19032886	0.8321	13111	0.4109	Blood	Blood	Blood
SAMN01923457	PRJNA189967	SINGLE	ILLUMINA	Illumina HiScanSQ	Sus scrofa	Unknown	Landrace x Yorkshire	Cross	Unknown	Unknown	17716903	15721282	0.8874	14076	0.441143	Blood	Blood	Blood
SAMN01923629	PRJNA190074	PAIRED	ABI_SOLID	AB SOLiD System 3.0	Sus scrofa domesticus	Unknown	Unknown	Unknown	Unknown	Unknown	0	0	0	0	0	Unknown	Unknown	Unknown
SAMN01924543	PRJNA190624	PAIRED	ILLUMINA	Illumina Genome Analyzer II	Sus scrofa	Landrace	Landrace x Yorkshire	Cross	Female	210 days	38171215	35422559	0.928	15071	0.472327	Adipose	Adipose	Adipose
SAMN01924544	PRJNA190624	PAIRED	ILLUMINA	Illumina Genome Analyzer II	Sus scrofa	Landrace	Landrace x Yorkshire	Cross	Female	210 days	36935991	33982266	0.92	15326	0.480318	Adipose	Adipose	Adipose
SAMN01924545	PRJNA190624	PAIRED	ILLUMINA	Illumina Genome Analyzer II	Sus scrofa	Landrace	Landrace x Yorkshire	Cross	Female	210 days	37860477	23337713	0.6164	16151	0.506174	Adipose	Adipose	Adipose
SAMN01978929	PRJNA193204	PAIRED	ILLUMINA	Illumina HiSeq 2000	Sus scrofa	Berkshire	Landrace x Yorkshire	Cross	Unknown	Unknown	19348033	18761131	0.9697	17481	0.547856	Adipose	Adipose	Adipose
SAMN01978930	PRJNA193204	PAIRED	ILLUMINA	Illumina HiSeq 2000	Sus scrofa	Berkshire	Landrace x Yorkshire	Cross	Unknown	Unknown	18105135	17591763	0.9716	16455	0.515701	Liver	Liver	Liver
SAMN01978931	PRJNA193204	PAIRED	ILLUMINA	Illumina HiSeq 2000	Sus scrofa	Berkshire	Landrace x Yorkshire	Cross	Unknown	Unknown	17858396	17209809	0.9637	16521	0.51777	Muscle	Muscle	Muscle
SAMN01978932	PRJNA193204	PAIRED	ILLUMINA	Illumina HiSeq 2000	Sus scrofa	Korean native pig	Landrace x Yorkshire	Cross	Unknown	Unknown	19915932	19465181	0.9774	17479	0.547794	Adipose	Adipose	Adipose
SAMN01978933	PRJNA193204	PAIRED	ILLUMINA	Illumina HiSeq 2000	Sus scrofa	Korean native pig	Landrace x Yorkshire	Cross	Unknown	Unknown	21844367	21177809	0.9695	16481	0.516516	Liver	Liver	Liver
SAMN01978934	PRJNA193204	PAIRED	ILLUMINA	Illumina HiSeq 2000	Sus scrofa	Korean native pig	Landrace x Yorkshire	Cross	Unknown	Unknown	17106826	16501740	0.9646	15367	0.481603	Muscle	Muscle	Muscle
SAMN02141546	PRJNA202247	SINGLE	ILLUMINA	Illumina HiSeq 2000	Sus scrofa	Jinhua	Unknown	Unknown	Unknown	1 day	6426712	598	0.0001	4	0.00012536	Unknown	Unknown	Unknown
SAMN02141547	PRJNA202247	SINGLE	ILLUMINA	Illumina HiSeq 2000	Sus scrofa	Jinhua	Unknown	Unknown	Unknown	1 day	4795798	66	0	0	0	Unknown	Unknown	Unknown
SAMN02141548	PRJNA202247	SINGLE	ILLUMINA	Illumina HiSeq 2000	Sus scrofa	Jinhua	Unknown	Unknown	Unknown	1 day	4207652	36	0	2	6.26802e-05	Unknown	Unknown	Unknown
SAMN02141549	PRJNA202247	SINGLE	ILLUMINA	Illumina HiSeq 2000	Sus scrofa	Jinhua	Unknown	Unknown	Unknown	30 days	4347957	16	0	0	0	Unknown	Unknown	Unknown
SAMN02141550	PRJNA202247	SINGLE	ILLUMINA	Illumina HiSeq 2000	Sus scrofa	Jinhua	Unknown	Unknown	Unknown	30 days	4520712	493	0.0001	0	0	Unknown	Unknown	Unknown
SAMN02141551	PRJNA202247	SINGLE	ILLUMINA	Illumina HiSeq 2000	Sus scrofa	Jinhua	Unknown	Unknown	Unknown	30 days	4596994	404	0.0001	0	0	Unknown	Unknown	Unknown
SAMN02141552	PRJNA202247	SINGLE	ILLUMINA	Illumina HiSeq 2000	Sus scrofa	Jinhua	Unknown	Unknown	Unknown	180 days	4768038	25	0	0	0	Unknown	Unknown	Unknown
SAMN02141553	PRJNA202247	SINGLE	ILLUMINA	Illumina HiSeq 2000	Sus scrofa	Jinhua	Unknown	Unknown	Unknown	180 days	5734970	76	0	0	0	Unknown	Unknown	Unknown
SAMN02141554	PRJNA202247	SINGLE	ILLUMINA	Illumina HiSeq 2000	Sus scrofa	Jinhua	Unknown	Unknown	Unknown	180 days	5591644	292	0.0001	1	3.13401e-05	Unknown	Unknown	Unknown
SAMN02141555	PRJNA202247	SINGLE	ILLUMINA	Illumina HiSeq 2000	Sus scrofa	Jinhua	Unknown	Unknown	Unknown	7 years	4378775	56	0	0	0	Unknown	Unknown	Unknown
SAMN02141556	PRJNA202247	SINGLE	ILLUMINA	Illumina HiSeq 2000	Sus scrofa	Jinhua	Unknown	Unknown	Unknown	7 years	4779688	46	0	0	0	Unknown	Unknown	Unknown
SAMN02141557	PRJNA202247	SINGLE	ILLUMINA	Illumina HiSeq 2000	Sus scrofa	Jinhua	Unknown	Unknown	Unknown	7 years	3607103	33	0	0	0	Unknown	Unknown	Unknown
SAMN02192766	PRJNA207556	SINGLE	ILLUMINA	Illumina HiSeq 2000	Sus scrofa	Large white	Unknown	Unknown	Unknown	240 days	67561161	717523	0.0106	4352	0.136392	Unknown	Unknown	Unknown
SAMN02192767	PRJNA207556	SINGLE	ILLUMINA	Illumina HiSeq 2000	Sus scrofa	Large white	Unknown	Unknown	Unknown	240 days	63694694	779233	0.0122	6234	0.195374	Unknown	Unknown	Unknown
SAMN02225659	PRJNA210515	SINGLE	ILLUMINA	Illumina HiSeq 2000	Sus scrofa	Large white	Yorkshire	European pigs	Unknown	3 days	5692489	5044370	0.8861	14603	0.45766	Adipose	Adipose	Adipose
SAMN02225709	PRJNA210515	SINGLE	ILLUMINA	Illumina HiSeq 2000	Sus scrofa	Large white	Yorkshire	European pigs	Unknown	3 days	5711780	5244705	0.9182	13865	0.434531	Adipose	Adipose	Adipose
SAMN02225712	PRJNA210515	SINGLE	ILLUMINA	Illumina HiSeq 2000	Sus scrofa	Large white	Yorkshire	European pigs	Unknown	3 days	5648748	5119237	0.9063	14128	0.442773	Adipose	Adipose	Adipose
SAMN02225713	PRJNA210515	SINGLE	ILLUMINA	Illumina HiSeq 2000	Sus scrofa	Large white	Landrace x Yorkshire	Cross	Unknown	3 days	5584065	4315055	0.7727	14238	0.44622	Muscle	Muscle	Muscle
SAMN02225714	PRJNA210515	SINGLE	ILLUMINA	Illumina HiSeq 2000	Sus scrofa	Large white	Landrace x Yorkshire	Cross	Unknown	3 days	5524869	4953766	0.8966	13948	0.437132	Muscle	Muscle	Muscle
SAMN02225715	PRJNA210515	SINGLE	ILLUMINA	Illumina HiSeq 2000	Sus scrofa	Large white	Yorkshire	European pigs	Unknown	3 days	5576441	4893233	0.8775	13997	0.438667	Muscle	Muscle	Muscle
SAMN02230669	PRJNA211619	SINGLE	ILLUMINA	Illumina HiSeq 2000	Sus scrofa	Unknown	Unknown	Unknown	Male	Unknown	32026250	7483763	0.2337	9016	0.282562	Unknown	Unknown	Unknown
SAMN02230670	PRJNA211619	SINGLE	ILLUMINA	Illumina HiSeq 2000	Sus scrofa	Unknown	Unknown	Unknown	Male	Unknown	25354068	5514456	0.2175	6824	0.213865	Unknown	Unknown	Unknown
SAMN02230671	PRJNA211619	SINGLE	ILLUMINA	Illumina HiSeq 2000	Sus scrofa	Unknown	Unknown	Unknown	Male	Unknown	38896448	8237587	0.2118	7644	0.239564	Unknown	Unknown	Unknown
SAMN02230672	PRJNA211619	SINGLE	ILLUMINA	Illumina HiSeq 2000	Sus scrofa	Unknown	Unknown	Unknown	Male	Unknown	35938580	7406616	0.2061	7747	0.242792	Unknown	Unknown	Unknown
SAMN02251018	PRJNA212016	SINGLE	ILLUMINA	Illumina Genome Analyzer IIx	Sus scrofa	Unknown	Landrace x Yorkshire	Cross	Female	Unknown	32029917	30695251	0.9583	18585	0.582456	Uterus	Uterus	Uterus
SAMN02251019	PRJNA212016	SINGLE	ILLUMINA	Illumina Genome Analyzer IIx	Sus scrofa	Unknown	Landrace x Yorkshire	Cross	Female	Unknown	30861182	29541111	0.9572	18218	0.570954	Uterus	Uterus	Uterus
SAMN02251020	PRJNA212016	SINGLE	ILLUMINA	Illumina Genome Analyzer IIx	Sus scrofa	Unknown	Landrace x Yorkshire	Cross	Female	Unknown	32669426	30924448	0.9466	18639	0.584148	Uterus	Uterus	Uterus
SAMN02251021	PRJNA212016	SINGLE	ILLUMINA	Illumina Genome Analyzer IIx	Sus scrofa	Unknown	Landrace x Yorkshire	Cross	Female	Unknown	35596815	34079843	0.9574	18230	0.57133	Uterus	Uterus	Uterus
SAMN02251022	PRJNA212016	SINGLE	ILLUMINA	Illumina Genome Analyzer IIx	Sus scrofa	Unknown	Landrace x Yorkshire	Cross	Female	Unknown	33513595	32089469	0.9575	18450	0.578225	Uterus	Uterus	Uterus
SAMN02251023	PRJNA212016	SINGLE	ILLUMINA	Illumina Genome Analyzer IIx	Sus scrofa	Unknown	Landrace x Yorkshire	Cross	Female	Unknown	34792641	33202406	0.9543	18523	0.580513	Uterus	Uterus	Uterus
SAMN02251024	PRJNA212016	SINGLE	ILLUMINA	Illumina Genome Analyzer IIx	Sus scrofa	Unknown	Landrace x Yorkshire	Cross	Female	Unknown	33318667	31876741	0.9567	18534	0.580857	Uterus	Uterus	Uterus
SAMN02251025	PRJNA212016	SINGLE	ILLUMINA	Illumina Genome Analyzer IIx	Sus scrofa	Unknown	Landrace x Yorkshire	Cross	Female	Unknown	35571439	33776127	0.9495	18607	0.583145	Uterus	Uterus	Uterus
SAMN02265249	PRJNA213400	SINGLE	ILLUMINA	Illumina Genome Analyzer	Sus scrofa	Unknown	Unknown	Unknown	Unknown	Unknown	11702611	464142	0.0397	4378	0.137207	Unknown	Unknown	Unknown
SAMN02265250	PRJNA213400	SINGLE	ILLUMINA	Illumina Genome Analyzer	Sus scrofa	Unknown	Unknown	Unknown	Unknown	Unknown	14972549	51718	0.0035	657	0.0205904	Unknown	Unknown	Unknown
SAMN02265251	PRJNA213400	SINGLE	ILLUMINA	Illumina Genome Analyzer	Sus scrofa	Unknown	Unknown	Unknown	Unknown	Unknown	14776383	72238	0.0049	899	0.0281748	Unknown	Unknown	Unknown
SAMN02340017	PRJNA217780	SINGLE	ILLUMINA	Illumina HiSeq 2000	Sus scrofa	Duroc x (Landrace x Yorkshire)	Unknown	Unknown	Unknown	Unknown	4766637	25740	0.0054	648	0.0203084	Unknown	Unknown	Unknown
SAMN02340018	PRJNA217780	SINGLE	ILLUMINA	Illumina HiSeq 2000	Sus scrofa	Duroc x (Landrace x Yorkshire)	Unknown	Unknown	Unknown	Unknown	0	0	0	0	0	Unknown	Unknown	Unknown
SAMN02340019	PRJNA217780	SINGLE	ILLUMINA	Illumina HiSeq 2000	Sus scrofa	Duroc x (Landrace x Yorkshire)	Unknown	Unknown	Unknown	Unknown	0	0	0	0	0	Unknown	Unknown	Unknown
SAMN02340020	PRJNA217780	SINGLE	ILLUMINA	Illumina HiSeq 2000	Sus scrofa	Duroc x (Landrace x Yorkshire)	Unknown	Unknown	Unknown	Unknown	0	0	0	0	0	Unknown	Unknown	Unknown
SAMN02340021	PRJNA217780	SINGLE	ILLUMINA	Illumina HiSeq 2000	Sus scrofa	Duroc x (Landrace x Yorkshire)	Unknown	Unknown	Unknown	Unknown	0	0	0	0	0	Unknown	Unknown	Unknown
SAMN02340022	PRJNA217780	SINGLE	ILLUMINA	Illumina HiSeq 2000	Sus scrofa	Duroc x (Landrace x Yorkshire)	Unknown	Unknown	Unknown	Unknown	0	0	0	0	0	Unknown	Unknown	Unknown
SAMN02358573	PRJNA219447	PAIRED	ILLUMINA	Illumina Genome Analyzer	Sus scrofa scrofa	(Large white x Landrace) x Pietrain	Unknown	Unknown	Unknown	3 weeks	109246385	98474180	0.9014	13847	0.433966	Unknown	Other	Other	Outlier
SAMN02364660	PRJNA221286	SINGLE	ILLUMINA	Illumina HiSeq 2000	Sus scrofa scrofa	Large white	Yorkshire	European pigs	Unknown	Unknown	31468650	29043428	0.9229	17420	0.545945	Duodenum	Small intestine	Duodenum
SAMN02364661	PRJNA221286	SINGLE	ILLUMINA	Illumina HiSeq 2000	Sus scrofa scrofa	Large white	Yorkshire	European pigs	Unknown	Unknown	25121929	23421245	0.9323	17344	0.543563	Duodenum	Small intestine	Duodenum
SAMN02364662	PRJNA221286	SINGLE	ILLUMINA	Illumina HiSeq 2000	Sus scrofa scrofa	Large white	Yorkshire	European pigs	Unknown	Unknown	25945682	24210463	0.9331	17326	0.542999	Duodenum	Small intestine	Duodenum
SAMN02364663	PRJNA221286	SINGLE	ILLUMINA	Illumina HiSeq 2000	Sus scrofa scrofa	Large white	Yorkshire	European pigs	Unknown	Unknown	27075769	25249898	0.9326	17302	0.542246	Duodenum	Small intestine	Duodenum
SAMN02364664	PRJNA221286	SINGLE	ILLUMINA	Illumina HiSeq 2500	Sus scrofa scrofa	Large white	Yorkshire	European pigs	Unknown	Unknown	33299327	31414260	0.9434	17872	0.56011	Jejunum	Small intestine	Jejunum
SAMN02364665	PRJNA221286	SINGLE	ILLUMINA	Illumina HiSeq 2000	Sus scrofa scrofa	Large white	Yorkshire	European pigs	Unknown	Unknown	29323380	27688060	0.9442	17400	0.545318	Jejunum	Small intestine	Jejunum
SAMN02364666	PRJNA221286	SINGLE	ILLUMINA	Illumina HiSeq 2000	Sus scrofa scrofa	Large white	Yorkshire	European pigs	Unknown	Unknown	24551020	23037395	0.9383	17066	0.53485	Jejunum	Small intestine	Jejunum
SAMN02364667	PRJNA221286	SINGLE	ILLUMINA	Illumina HiSeq 2000	Sus scrofa scrofa	Large white	Yorkshire	European pigs	Unknown	Unknown	30541844	28770221	0.942	17541	0.549737	Jejunum	Small intestine	Jejunum
SAMN02364668	PRJNA221286	SINGLE	ILLUMINA	Illumina HiSeq 2000	Sus scrofa scrofa	Large white	Yorkshire	European pigs	Unknown	Unknown	18767421	17787588	0.9478	17322	0.542873	Ileum	Small intestine	Ileum
SAMN02364669	PRJNA221286	SINGLE	ILLUMINA	Illumina HiSeq 2000	Sus scrofa scrofa	Large white	Yorkshire	European pigs	Unknown	Unknown	32445451	30489469	0.9397	17366	0.544252	Ileum	Small intestine	Ileum
SAMN02364670	PRJNA221286	SINGLE	ILLUMINA	Illumina HiSeq 2000	Sus scrofa scrofa	Large white	Yorkshire	European pigs	Unknown	Unknown	22571176	21254807	0.9417	17218	0.539614	Ileum	Small intestine	Ileum
SAMN02364671	PRJNA221286	SINGLE	ILLUMINA	Illumina HiSeq 2000	Sus scrofa scrofa	Large white	Yorkshire	European pigs	Unknown	Unknown	23816646	22418586	0.9413	17500	0.548452	Ileum	Small intestine	Ileum
SAMN02364672	PRJNA221286	SINGLE	ILLUMINA	Illumina HiSeq 2000	Sus scrofa scrofa	Large white	Unknown	Unknown	Unknown	Unknown	26415930	24980577	0.9457	17863	0.559828	Intestine Peyers patches	Other	Other	Outlier
SAMN02364673	PRJNA221286	SINGLE	ILLUMINA	Illumina HiSeq 2000	Sus scrofa scrofa	Large white	Unknown	Unknown	Unknown	Unknown	20931759	19336078	0.9238	17859	0.559703	Intestine Peyers patches	Other	Other	Outlier
SAMN02364674	PRJNA221286	SINGLE	ILLUMINA	Illumina HiSeq 2000	Sus scrofa scrofa	Large white	Unknown	Unknown	Unknown	Unknown	27341099	25771420	0.9426	17911	0.561333	Intestine Peyers patches	Other	Other	Outlier
SAMN02364675	PRJNA221286	SINGLE	ILLUMINA	Illumina HiSeq 2000	Sus scrofa scrofa	Large white	Unknown	Unknown	Unknown	Unknown	29985508	28306015	0.944	18005	0.564279	Intestine Peyers patches	Other	Other	Outlier
SAMN02369917	PRJNA222300	SINGLE	ILLUMINA	Illumina HiSeq 2000	Sus scrofa	Unknown	Landrace x Yorkshire	Cross	Unknown	1 day	13907905	12594283	0.9055	15554	0.487464	Muscle	Muscle	Muscle
SAMN02369925	PRJNA222300	SINGLE	ILLUMINA	Illumina HiSeq 2000	Sus scrofa	Unknown	Landrace x Yorkshire	Cross	Unknown	1 day	15205293	13225997	0.8698	15996	0.501316	Muscle	Muscle	Muscle
SAMN02378866	PRJNA223356	PAIRED	ILLUMINA	Illumina HiSeq 2000	Sus scrofa	Iberian x Landrace	Iberian x Landrace	Cross	Unknown	Unknown	27047634	26278491	0.9716	15399	0.482606	Adipose	Adipose	Adipose
SAMN02378867	PRJNA223356	PAIRED	ILLUMINA	Illumina HiSeq 2000	Sus scrofa	Iberian x Landrace	Unknown	Unknown	Unknown	Unknown	16497325	16158117	0.9794	8719	0.273254	Adipose	Adipose	Adipose
SAMN02378868	PRJNA223356	PAIRED	ILLUMINA	Illumina HiSeq 2000	Sus scrofa	Iberian x Landrace	Unknown	Unknown	Unknown	Unknown	12837300	12543589	0.9771	9483	0.297198	Adipose	Adipose	Adipose
SAMN02378869	PRJNA223356	PAIRED	ILLUMINA	Illumina HiSeq 2000	Sus scrofa	Iberian x Landrace	Unknown	Unknown	Unknown	Unknown	0	0	0	0	0	Unknown	Unknown	Unknown
SAMN02378870	PRJNA223356	PAIRED	ILLUMINA	Illumina HiSeq 2000	Sus scrofa	Iberian x Landrace	Iberian x Landrace	Cross	Unknown	Unknown	17343078	16927091	0.976	13831	0.433465	Adipose	Adipose	Adipose
SAMN02378903	PRJNA223356	PAIRED	ILLUMINA	Illumina HiSeq 2000	Sus scrofa	Iberian x Landrace	Iberian x Landrace	Cross	Unknown	Unknown	28701360	27934891	0.9733	15578	0.488216	Adipose	Adipose	Adipose
SAMN02389758	PRJNA225941	PAIRED	ILLUMINA	Illumina HiSeq 2000	Sus scrofa	Iberian x Landrace	Iberian x Landrace	Cross	Unknown	Unknown	48452477	46442103	0.9585	19798	0.620471	Hypothalamus	Brain	Hypothalamus
SAMN02389759	PRJNA225941	PAIRED	ILLUMINA	Illumina HiSeq 2000	Sus scrofa	Iberian x Landrace	Iberian x Landrace	Cross	Unknown	Unknown	47928744	45429002	0.9478	19041	0.596747	Hypothalamus	Brain	Hypothalamus
SAMN02389760	PRJNA225941	PAIRED	ILLUMINA	Illumina HiSeq 2000	Sus scrofa	Iberian x Landrace	Iberian x Landrace	Cross	Unknown	Unknown	46672913	43961191	0.9419	19634	0.615332	Hypothalamus	Brain	Hypothalamus
SAMN02389761	PRJNA225941	PAIRED	ILLUMINA	Illumina HiSeq 2000	Sus scrofa	Iberian x Landrace	Iberian x Landrace	Cross	Unknown	Unknown	50543883	47865489	0.947	18713	0.586467	Hypothalamus	Brain	Hypothalamus
SAMN02389762	PRJNA225941	PAIRED	ILLUMINA	Illumina HiSeq 2000	Sus scrofa	Iberian x Landrace	Iberian x Landrace	Cross	Unknown	Unknown	47651055	44766702	0.9395	19110	0.598909	Hypothalamus	Brain	Hypothalamus
SAMN02389763	PRJNA225941	PAIRED	ILLUMINA	Illumina HiSeq 2000	Sus scrofa	Iberian x Landrace	Iberian x Landrace	Cross	Unknown	Unknown	55016846	52457105	0.9535	19292	0.604613	Hypothalamus	Brain	Hypothalamus
SAMN02389764	PRJNA225941	PAIRED	ILLUMINA	Illumina HiSeq 2000	Sus scrofa	Iberian x Landrace	Iberian x Landrace	Cross	Unknown	Unknown	41272709	39159404	0.9488	19364	0.60687	Hypothalamus	Brain	Hypothalamus
SAMN02389765	PRJNA225941	PAIRED	ILLUMINA	Illumina HiSeq 2000	Sus scrofa	Iberian x Landrace	Iberian x Landrace	Cross	Unknown	Unknown	50670732	48140944	0.9501	19487	0.610725	Hypothalamus	Brain	Hypothalamus
SAMN02389766	PRJNA225941	PAIRED	ILLUMINA	Illumina HiSeq 2000	Sus scrofa	Iberian x Landrace	Iberian x Landrace	Cross	Unknown	Unknown	64627355	62087970	0.9607	19318	0.605428	Hypothalamus	Brain	Hypothalamus
SAMN02389767	PRJNA225941	PAIRED	ILLUMINA	Illumina HiSeq 2000	Sus scrofa	Iberian x Landrace	Iberian x Landrace	Cross	Unknown	Unknown	50283885	47597146	0.9466	18833	0.590228	Hypothalamus	Brain	Hypothalamus
SAMN02440184	PRJNA231038	SINGLE	ILLUMINA	Illumina HiSeq 2000	Sus scrofa domesticus	Unknown	Landrace x Yorkshire	Cross	Unknown	5 weeks	29779947	27795564	0.9334	12816	0.401655	Macrophage	Blood	Macrophage
SAMN02440185	PRJNA231038	SINGLE	ILLUMINA	Illumina HiSeq 2000	Sus scrofa domesticus	Unknown	Landrace x Yorkshire	Cross	Unknown	5 weeks	29098040	27026005	0.9288	12630	0.395825	Macrophage	Blood	Macrophage
SAMN02440186	PRJNA231038	SINGLE	ILLUMINA	Illumina HiSeq 2000	Sus scrofa domesticus	Unknown	Landrace x Yorkshire	Cross	Unknown	5 weeks	28848703	27198340	0.9428	13022	0.408111	Macrophage	Blood	Macrophage
SAMN02440187	PRJNA231038	SINGLE	ILLUMINA	Illumina HiSeq 2000	Sus scrofa domesticus	Unknown	Landrace x Yorkshire	Cross	Unknown	5 weeks	29904730	28032716	0.9374	12390	0.388304	Macrophage	Blood	Macrophage
SAMN02440188	PRJNA231038	SINGLE	ILLUMINA	Illumina HiSeq 2000	Sus scrofa domesticus	Unknown	Landrace x Yorkshire	Cross	Unknown	5 weeks	29466810	27720323	0.9407	12722	0.398709	Macrophage	Blood	Macrophage
SAMN02440189	PRJNA231038	SINGLE	ILLUMINA	Illumina HiSeq 2000	Sus scrofa domesticus	Unknown	Landrace x Yorkshire	Cross	Unknown	5 weeks	31009739	28908111	0.9322	12905	0.404444	Macrophage	Blood	Macrophage
SAMN02460688	PRJNA231898	PAIRED	ILLUMINA	Illumina HiSeq 2000	Sus scrofa	Landrace x Yorkshire	Unknown	Unknown	Male	0 day	75010215	51653769	0.6886	6198	0.194246	Embryo	Embryo	Embryo
SAMN02460690	PRJNA231898	PAIRED	ILLUMINA	Illumina HiSeq 2000	Sus scrofa	Landrace x Yorkshire	Landrace x Yorkshire	Cross	Male	0 day	138399997	106352452	0.7684	12718	0.398583	Embryo	Embryo	Embryo
SAMN02460691	PRJNA231898	PAIRED	ILLUMINA	Illumina HiSeq 2000	Sus scrofa	Landrace x Yorkshire	Unknown	Unknown	Male	0 day	216330326	176404815	0.8154	12866	0.403222	ERSE cell	Other	Other	Outlier
SAMN02460694	PRJNA231898	PAIRED	ILLUMINA	Illumina HiSeq 2000	Sus scrofa	Landrace x Yorkshire	Landrace x Yorkshire	Cross	Male	0 day	147894658	127293575	0.8607	10305	0.32296	Embryo	Embryo	Embryo
SAMN02460696	PRJNA231898	PAIRED	ILLUMINA	Illumina HiSeq 2000	Sus scrofa	Landrace x Yorkshire	Landrace x Yorkshire	Cross	Male	0 day	190203089	156621157	0.8234	11776	0.369061	Embryo	Embryo	Embryo
SAMN02460698	PRJNA231898	PAIRED	ILLUMINA	Illumina HiSeq 2000	Sus scrofa	Landrace x Yorkshire	Unknown	Unknown	Male	0 day	188820398	163648828	0.8667	12811	0.401498	ERSE cell	Other	Other	Outlier
SAMN02460699	PRJNA231898	PAIRED	ILLUMINA	Illumina HiSeq 2000	Sus scrofa	Landrace x Yorkshire	Unknown	Unknown	Male	0 day	195944916	153548582	0.7836	11651	0.365144	ERSE cell	Other	Other	Outlier
SAMN02460700	PRJNA231898	PAIRED	ILLUMINA	Illumina HiSeq 2000	Sus scrofa	Landrace x Yorkshire	Landrace x Yorkshire	Cross	Male	0 day	154281457	140927598	0.9134	11627	0.364391	Embryo	Embryo	Embryo
SAMN02460704	PRJNA231898	PAIRED	ILLUMINA	Illumina HiSeq 2000	Sus scrofa	Landrace x Yorkshire	Landrace x Yorkshire	Cross	Male	0 day	171498228	154882610	0.9031	13611	0.42657	Embryo	Embryo	Embryo
SAMN02570534	PRJNA234335	PAIRED	ILLUMINA	Illumina HiSeq 2000	Sus scrofa	Songliao black pig	Songliao black pig	Cross	Female	218 days	26518594	25537506	0.963	17384	0.544816	Adipose	Adipose	Adipose
SAMN02570535	PRJNA234335	PAIRED	ILLUMINA	Illumina HiSeq 2000	Sus scrofa	Songliao black pig	Songliao black pig	Cross	Female	218 days	26596596	25590384	0.9622	18060	0.566002	Adipose	Adipose	Adipose
SAMN02570536	PRJNA234335	PAIRED	ILLUMINA	Illumina HiSeq 2000	Sus scrofa	Songliao black pig	Songliao black pig	Cross	Female	216 days	25389081	24479492	0.9642	17928	0.561865	Adipose	Adipose	Adipose
SAMN02570537	PRJNA234335	PAIRED	ILLUMINA	Illumina HiSeq 2000	Sus scrofa	Songliao black pig	Songliao black pig	Cross	Female	216 days	26335898	25357692	0.9629	17887	0.56058	Adipose	Adipose	Adipose
SAMN02570538	PRJNA234335	PAIRED	ILLUMINA	Illumina HiSeq 2000	Sus scrofa	Songliao black pig	Songliao black pig	Cross	Female	211 days	24317861	23433116	0.9636	18151	0.568854	Adipose	Adipose	Adipose
SAMN02570539	PRJNA234335	PAIRED	ILLUMINA	Illumina HiSeq 2000	Sus scrofa	Songliao black pig	Songliao black pig	Cross	Female	218 days	26014983	25126209	0.9658	18297	0.57343	Adipose	Adipose	Adipose
SAMN02570541	PRJNA234465	PAIRED	ILLUMINA	Illumina HiSeq 2000	Sus scrofa	Songliao black pig	Songliao black pig	Cross	Female	218 days	26425660	25190895	0.9533	16506	0.5173	Liver	Liver	Liver
SAMN02570542	PRJNA234465	PAIRED	ILLUMINA	Illumina HiSeq 2000	Sus scrofa	Songliao black pig	Songliao black pig	Cross	Female	218 days	25088399	23944567	0.9544	16916	0.530149	Liver	Liver	Liver
SAMN02570543	PRJNA234465	PAIRED	ILLUMINA	Illumina HiSeq 2000	Sus scrofa	Songliao black pig	Songliao black pig	Cross	Female	216 days	25340659	24159989	0.9534	16198	0.507647	Liver	Liver	Liver
SAMN02570544	PRJNA234465	SINGLE	ILLUMINA	Illumina HiSeq 2000	Sus scrofa	Songliao black pig	Songliao black pig	Cross	Female	216 days	25531187	24186724	0.9473	16960	0.531528	Liver	Liver	Liver
SAMN02584787	PRJNA235171	SINGLE	ILLUMINA	Illumina HiSeq 2000	Sus scrofa	Rongchang	Rongchang	Asian pigs	Unknown	Unknown	46107333	43251442	0.9381	15304	0.479629	Liver	Liver	Liver
SAMN02584789	PRJNA235171	SINGLE	ILLUMINA	Illumina HiSeq 2000	Sus scrofa	Rongchang	Rongchang	Asian pigs	Unknown	Unknown	45073201	41192403	0.9139	18919	0.592923	Brain	Brain	Brain
SAMN02640035	PRJNA237914	PAIRED	ILLUMINA	Illumina Genome Analyzer II	Sus scrofa	Unknown	Unknown	Unknown	Female	Unknown	12114642	6349545	0.5241	11145	0.349285	Unknown	Unknown	Unknown
SAMN02640036	PRJNA237914	PAIRED	ILLUMINA	Illumina Genome Analyzer II	Sus scrofa	Unknown	Unknown	Unknown	Female	Unknown	6861548	4104481	0.5982	11020	0.345368	Unknown	Unknown	Unknown
SAMN02640037	PRJNA237914	PAIRED	ILLUMINA	Illumina Genome Analyzer II	Sus scrofa	Unknown	Unknown	Unknown	Female	Unknown	11133535	3424743	0.3076	10399	0.325906	Unknown	Unknown	Unknown
SAMN02640038	PRJNA237914	PAIRED	ILLUMINA	Illumina Genome Analyzer II	Sus scrofa	Unknown	Unknown	Unknown	Female	Unknown	5786779	2723624	0.4707	9300	0.291463	Unknown	Unknown	Unknown
SAMN02640039	PRJNA237914	PAIRED	ILLUMINA	Illumina Genome Analyzer II	Sus scrofa	Unknown	Unknown	Unknown	Female	Unknown	9371792	3383000	0.361	9824	0.307885	Unknown	Unknown	Unknown
SAMN02640040	PRJNA237914	PAIRED	ILLUMINA	Illumina Genome Analyzer II	Sus scrofa	Unknown	Unknown	Unknown	Female	Unknown	2007691	1048374	0.5222	7942	0.248903	Unknown	Unknown	Unknown
SAMN02650279	PRJNA239206	SINGLE	ABI_SOLID	AB SOLiD 4 System	Sus scrofa	Nongdaxiang	Unknown	Unknown	Female	10 months	3012785	2858300	0.9487	1193	0.0373887	Embryo	Embryo	Embryo
SAMN02650280	PRJNA239206	SINGLE	ABI_SOLID	AB SOLiD 4 System	Sus scrofa	Nongdaxiang	Unknown	Unknown	Female	10 months	20934201	19410100	0.9272	5954	0.186599	Embryo	Embryo	Embryo
SAMN02650281	PRJNA239206	SINGLE	ABI_SOLID	AB SOLiD 4 System	Sus scrofa	Nongdaxiang	Unknown	Unknown	Female	10 months	13432896	12466408	0.9281	4043	0.126708	Embryo	Embryo	Embryo
SAMN02650282	PRJNA239206	SINGLE	ABI_SOLID	AB SOLiD 4 System	Sus scrofa	Nongdaxiang	Unknown	Unknown	Female	10 months	19008620	16413748	0.8635	5192	0.162718	Embryo	Embryo	Embryo
SAMN02650283	PRJNA239206	SINGLE	ABI_SOLID	AB SOLiD 4 System	Sus scrofa	Nongdaxiang	Unknown	Unknown	Female	10 months	19774819	17269197	0.8733	4424	0.138649	Embryo	Embryo	Embryo
SAMN02650284	PRJNA239206	SINGLE	ABI_SOLID	AB SOLiD 4 System	Sus scrofa	Nongdaxiang	Nongdaxiang	Asian pigs	Female	10 months	33037341	26704403	0.8083	11259	0.352858	Embryo	Embryo	Embryo
SAMN02650285	PRJNA239206	SINGLE	ABI_SOLID	AB SOLiD 4 System	Sus scrofa	Nongdaxiang	Unknown	Unknown	Female	10 months	13294648	11607974	0.8731	4889	0.153222	Embryo	Embryo	Embryo
SAMN02650286	PRJNA239206	SINGLE	ABI_SOLID	AB SOLiD 4 System	Sus scrofa	Nongdaxiang	Unknown	Unknown	Female	10 months	14587045	12781522	0.8762	3029	0.0949292	Embryo	Embryo	Embryo
SAMN02672955	PRJNA240057	PAIRED	ILLUMINA	Illumina HiSeq 2000	Sus scrofa	Iberian x Landrace	Iberian x Landrace	Cross	Female	180 days	27678806	26515082	0.958	13425	0.420741	Muscle	Muscle	Muscle
SAMN02673051	PRJNA240057	PAIRED	ILLUMINA	Illumina HiSeq 2000	Sus scrofa	Iberian x Landrace	Iberian x Landrace	Cross	Female	180 days	18693327	17981859	0.9619	13181	0.413094	Muscle	Muscle	Muscle
SAMN02673052	PRJNA240057	PAIRED	ILLUMINA	Illumina HiSeq 2000	Sus scrofa	Iberian x Landrace	Unknown	Unknown	Female	180 days	0	0	0	0	0	Unknown	Unknown	Unknown
SAMN02673053	PRJNA240057	PAIRED	ILLUMINA	Illumina HiSeq 2000	Sus scrofa	Iberian x Landrace	Unknown	Unknown	Female	180 days	13142502	12427928	0.9456	8049	0.252256	Muscle	Muscle	Muscle
SAMN02673054	PRJNA240057	PAIRED	ILLUMINA	Illumina HiSeq 2000	Sus scrofa	Iberian x Landrace	Iberian x Landrace	Cross	Female	180 days	25219023	24253252	0.9617	13265	0.415726	Muscle	Muscle	Muscle
SAMN02673055	PRJNA240057	PAIRED	ILLUMINA	Illumina HiSeq 2000	Sus scrofa	Iberian x Landrace	Iberian x Landrace	Cross	Female	180 days	19219071	18432328	0.9591	12364	0.387489	Muscle	Muscle	Muscle
SAMN02673056	PRJNA240057	PAIRED	ILLUMINA	Illumina HiSeq 2000	Sus scrofa	Iberian x Landrace	Unknown	Unknown	Female	180 days	0	0	0	0	0	Unknown	Unknown	Unknown
SAMN02673057	PRJNA240057	PAIRED	ILLUMINA	Illumina HiSeq 2000	Sus scrofa	Iberian x Landrace	Iberian x Landrace	Cross	Female	180 days	15224594	14471580	0.9505	11992	0.375831	Muscle	Muscle	Muscle
SAMN02673058	PRJNA240057	PAIRED	ILLUMINA	Illumina HiSeq 2000	Sus scrofa	Iberian x Landrace	Iberian x Landrace	Cross	Female	180 days	20514893	19697798	0.9602	13223	0.41441	Muscle	Muscle	Muscle
SAMN02673059	PRJNA240057	PAIRED	ILLUMINA	Illumina HiSeq 2000	Sus scrofa	Iberian x Landrace	Iberian x Landrace	Cross	Female	180 days	8575956	8213175	0.9577	12711	0.398364	Muscle	Muscle	Muscle
SAMN02673062	PRJNA240057	PAIRED	ILLUMINA	Illumina HiSeq 2000	Sus scrofa	Iberian x Landrace	Iberian x Landrace	Cross	Female	180 days	20684861	19900288	0.9621	13601	0.426257	Muscle	Muscle	Muscle
SAMN02673063	PRJNA240057	PAIRED	ILLUMINA	Illumina HiSeq 2000	Sus scrofa	Iberian x Landrace	Iberian x Landrace	Cross	Female	180 days	18249320	17591328	0.9639	13108	0.410806	Muscle	Muscle	Muscle
SAMN02676459	PRJNA240332	PAIRED	ILLUMINA	Illumina HiSeq 2000	Sus scrofa	Landrace x Yorkshire	Landrace x Yorkshire	Cross	Unknown	Unknown	12967324	10001156	0.7713	14263	0.447004	Liver	Liver	Liver
SAMN02676460	PRJNA240332	PAIRED	ILLUMINA	Illumina HiSeq 2000	Sus scrofa	Landrace x Yorkshire	Landrace x Yorkshire	Cross	Unknown	Unknown	12297433	9928399	0.8074	14676	0.459947	Liver	Liver	Liver
SAMN02676461	PRJNA240332	PAIRED	ILLUMINA	Illumina HiSeq 2000	Sus scrofa	Landrace x Yorkshire	Landrace x Yorkshire	Cross	Unknown	Unknown	10224863	8257400	0.8076	13982	0.438197	Liver	Liver	Liver
SAMN02676462	PRJNA240332	PAIRED	ILLUMINA	Illumina HiSeq 2000	Sus scrofa	Landrace x Yorkshire	Landrace x Yorkshire	Cross	Unknown	Unknown	9817257	8189836	0.8342	14690	0.460386	Liver	Liver	Liver
SAMN02676463	PRJNA240332	PAIRED	ILLUMINA	Illumina HiSeq 2000	Sus scrofa	Landrace x Yorkshire	Yorkshire	European pigs	Unknown	Unknown	11616488	8721496	0.7508	14642	0.458882	Liver	Liver	Liver
SAMN02676464	PRJNA240332	PAIRED	ILLUMINA	Illumina HiSeq 2000	Sus scrofa	Landrace x Yorkshire	Yorkshire	European pigs	Unknown	Unknown	13294395	10386484	0.7813	14429	0.452206	Liver	Liver	Liver
SAMN02676465	PRJNA240332	PAIRED	ILLUMINA	Illumina HiSeq 2000	Sus scrofa	Landrace x Yorkshire	Landrace x Yorkshire	Cross	Unknown	Unknown	8412117	6841097	0.8132	13973	0.437915	Liver	Liver	Liver
SAMN02676466	PRJNA240332	PAIRED	ILLUMINA	Illumina HiSeq 2000	Sus scrofa	Landrace x Yorkshire	Landrace x Yorkshire	Cross	Unknown	Unknown	10151584	8469447	0.8343	14255	0.446753	Liver	Liver	Liver
SAMN02676467	PRJNA240332	PAIRED	ILLUMINA	Illumina HiSeq 2000	Sus scrofa	Landrace x Yorkshire	Landrace x Yorkshire	Cross	Unknown	Unknown	10845679	8550265	0.7884	14451	0.452896	Liver	Liver	Liver
SAMN02676468	PRJNA240332	PAIRED	ILLUMINA	Illumina HiSeq 2000	Sus scrofa	Landrace x Yorkshire	Yorkshire	European pigs	Unknown	Unknown	12445741	9799870	0.7874	14588	0.457189	Liver	Liver	Liver
SAMN02676469	PRJNA240332	PAIRED	ILLUMINA	Illumina HiSeq 2000	Sus scrofa	Landrace x Yorkshire	Landrace x Yorkshire	Cross	Unknown	Unknown	10682220	9482544	0.8877	13671	0.428451	Liver	Liver	Liver
SAMN02676470	PRJNA240332	PAIRED	ILLUMINA	Illumina HiSeq 2000	Sus scrofa	Landrace x Yorkshire	Landrace x Yorkshire	Cross	Unknown	Unknown	8287792	6018386	0.7262	13909	0.435909	Liver	Liver	Liver
SAMN02676471	PRJNA240332	PAIRED	ILLUMINA	Illumina HiSeq 2000	Sus scrofa	Landrace x Yorkshire	Landrace x Yorkshire	Cross	Unknown	Unknown	11424734	9600552	0.8403	14751	0.462298	Liver	Liver	Liver
SAMN02676472	PRJNA240332	PAIRED	ILLUMINA	Illumina HiSeq 2000	Sus scrofa	Landrace x Yorkshire	Yorkshire	European pigs	Unknown	Unknown	11358583	8338565	0.7341	14253	0.44669	Liver	Liver	Liver
SAMN02676473	PRJNA240332	PAIRED	ILLUMINA	Illumina HiSeq 2000	Sus scrofa	Landrace x Yorkshire	Landrace x Yorkshire	Cross	Unknown	Unknown	13240621	11494859	0.8682	15108	0.473486	Liver	Liver	Liver
SAMN02676474	PRJNA240332	PAIRED	ILLUMINA	Illumina HiSeq 2000	Sus scrofa	Landrace x Yorkshire	Landrace x Yorkshire	Cross	Unknown	Unknown	10676193	9138196	0.8559	13854	0.434186	Liver	Liver	Liver
SAMN02676475	PRJNA240332	PAIRED	ILLUMINA	Illumina HiSeq 2000	Sus scrofa	Landrace x Yorkshire	Landrace x Yorkshire	Cross	Unknown	Unknown	11052195	7554424	0.6835	13735	0.430456	Liver	Liver	Liver
SAMN02676476	PRJNA240332	PAIRED	ILLUMINA	Illumina HiSeq 2000	Sus scrofa	Landrace x Yorkshire	Yorkshire	European pigs	Unknown	Unknown	10264035	8527880	0.8309	14421	0.451956	Liver	Liver	Liver
SAMN02676477	PRJNA240332	PAIRED	ILLUMINA	Illumina HiSeq 2000	Sus scrofa	Landrace x Yorkshire	Landrace x Yorkshire	Cross	Unknown	Unknown	9652745	8046072	0.8336	14038	0.439952	Liver	Liver	Liver
SAMN02676478	PRJNA240332	PAIRED	ILLUMINA	Illumina HiSeq 2000	Sus scrofa	Landrace x Yorkshire	Yorkshire	European pigs	Unknown	Unknown	11794873	9837551	0.8341	14793	0.463614	Liver	Liver	Liver
SAMN02676479	PRJNA240332	PAIRED	ILLUMINA	Illumina HiSeq 2000	Sus scrofa	Landrace x Yorkshire	Landrace x Yorkshire	Cross	Unknown	Unknown	11849350	9055146	0.7642	14080	0.441269	Liver	Liver	Liver
SAMN02676480	PRJNA240332	PAIRED	ILLUMINA	Illumina HiSeq 2000	Sus scrofa	Landrace x Yorkshire	Landrace x Yorkshire	Cross	Unknown	Unknown	9752283	8010802	0.8214	13484	0.42259	Liver	Liver	Liver
SAMN02676481	PRJNA240332	PAIRED	ILLUMINA	Illumina HiSeq 2000	Sus scrofa	Landrace x Yorkshire	Landrace x Yorkshire	Cross	Unknown	Unknown	10881712	8406243	0.7725	13739	0.430582	Liver	Liver	Liver
SAMN02676482	PRJNA240332	PAIRED	ILLUMINA	Illumina HiSeq 2000	Sus scrofa	Landrace x Yorkshire	Landrace x Yorkshire	Cross	Unknown	Unknown	8704987	6962116	0.7998	13872	0.43475	Liver	Liver	Liver
SAMN02676483	PRJNA240332	PAIRED	ILLUMINA	Illumina HiSeq 2000	Sus scrofa	Landrace x Yorkshire	Landrace x Yorkshire	Cross	Unknown	Unknown	10217579	8082935	0.7911	14354	0.449856	Liver	Liver	Liver
SAMN02676484	PRJNA240332	PAIRED	ILLUMINA	Illumina HiSeq 2000	Sus scrofa	Landrace x Yorkshire	Landrace x Yorkshire	Cross	Unknown	Unknown	10398595	8495475	0.817	14211	0.445374	Liver	Liver	Liver
SAMN02676485	PRJNA240332	PAIRED	ILLUMINA	Illumina HiSeq 2000	Sus scrofa	Landrace x Yorkshire	Landrace x Yorkshire	Cross	Unknown	Unknown	8120588	6577385	0.81	14028	0.439639	Liver	Liver	Liver
SAMN02676486	PRJNA240332	PAIRED	ILLUMINA	Illumina HiSeq 2000	Sus scrofa	Landrace x Yorkshire	Yorkshire	European pigs	Unknown	Unknown	11347813	9164577	0.8076	14590	0.457252	Liver	Liver	Liver
SAMN02676487	PRJNA240332	PAIRED	ILLUMINA	Illumina HiSeq 2000	Sus scrofa	Landrace x Yorkshire	Yorkshire	European pigs	Unknown	Unknown	11030263	8359310	0.7579	14029	0.43967	Liver	Liver	Liver
SAMN02676488	PRJNA240332	PAIRED	ILLUMINA	Illumina HiSeq 2000	Sus scrofa	Landrace x Yorkshire	Landrace x Yorkshire	Cross	Unknown	Unknown	12945841	10989687	0.8489	14112	0.442272	Liver	Liver	Liver
SAMN02676489	PRJNA240332	PAIRED	ILLUMINA	Illumina HiSeq 2000	Sus scrofa	Landrace x Yorkshire	Landrace x Yorkshire	Cross	Unknown	Unknown	9428663	7772256	0.8243	13846	0.433935	Liver	Liver	Liver
SAMN02676490	PRJNA240332	PAIRED	ILLUMINA	Illumina HiSeq 2000	Sus scrofa	Landrace x Yorkshire	Yorkshire	European pigs	Unknown	Unknown	9982199	7998963	0.8013	13908	0.435878	Liver	Liver	Liver
SAMN02676491	PRJNA240332	PAIRED	ILLUMINA	Illumina HiSeq 2000	Sus scrofa	Landrace x Yorkshire	Landrace x Yorkshire	Cross	Unknown	Unknown	11535789	9609584	0.833	14495	0.454275	Liver	Liver	Liver
SAMN02676492	PRJNA240332	PAIRED	ILLUMINA	Illumina HiSeq 2000	Sus scrofa	Landrace x Yorkshire	Landrace x Yorkshire	Cross	Unknown	Unknown	13048481	9273636	0.7107	14069	0.440924	Liver	Liver	Liver
SAMN02676493	PRJNA240332	PAIRED	ILLUMINA	Illumina HiSeq 2000	Sus scrofa	Landrace x Yorkshire	Landrace x Yorkshire	Cross	Unknown	Unknown	9792533	8271915	0.8447	13925	0.436411	Liver	Liver	Liver
SAMN02676494	PRJNA240332	PAIRED	ILLUMINA	Illumina HiSeq 2000	Sus scrofa	Landrace x Yorkshire	Landrace x Yorkshire	Cross	Unknown	Unknown	10255868	8404229	0.8195	14042	0.440078	Liver	Liver	Liver
SAMN02676495	PRJNA240332	PAIRED	ILLUMINA	Illumina HiSeq 2000	Sus scrofa	Landrace x Yorkshire	Landrace x Yorkshire	Cross	Unknown	Unknown	11671112	8714726	0.7467	14258	0.446847	Liver	Liver	Liver
SAMN02676496	PRJNA240332	PAIRED	ILLUMINA	Illumina HiSeq 2000	Sus scrofa	Landrace x Yorkshire	Yorkshire	European pigs	Unknown	Unknown	10843912	8387065	0.7734	14045	0.440172	Liver	Liver	Liver
SAMN02676497	PRJNA240332	PAIRED	ILLUMINA	Illumina HiSeq 2000	Sus scrofa	Landrace x Yorkshire	Landrace x Yorkshire	Cross	Unknown	Unknown	13100534	10000881	0.7634	14280	0.447537	Liver	Liver	Liver
SAMN02676498	PRJNA240332	PAIRED	ILLUMINA	Illumina HiSeq 2000	Sus scrofa	Landrace x Yorkshire	Landrace x Yorkshire	Cross	Unknown	Unknown	8857638	6463074	0.7297	13914	0.436066	Liver	Liver	Liver
SAMN02676499	PRJNA240332	PAIRED	ILLUMINA	Illumina HiSeq 2000	Sus scrofa	Landrace x Yorkshire	Landrace x Yorkshire	Cross	Unknown	Unknown	12189906	8231670	0.6753	15584	0.488404	Liver	Liver	Liver
SAMN02676500	PRJNA240332	PAIRED	ILLUMINA	Illumina HiSeq 2000	Sus scrofa	Landrace x Yorkshire	Landrace x Yorkshire	Cross	Unknown	Unknown	10830961	8421452	0.7775	14835	0.46493	Liver	Liver	Liver
SAMN02676501	PRJNA240332	PAIRED	ILLUMINA	Illumina HiSeq 2000	Sus scrofa	Landrace x Yorkshire	Landrace x Yorkshire	Cross	Unknown	Unknown	18763046	15220865	0.8112	14704	0.460825	Liver	Liver	Liver
SAMN02676502	PRJNA240332	PAIRED	ILLUMINA	Illumina HiSeq 2000	Sus scrofa	Landrace x Yorkshire	Landrace x Yorkshire	Cross	Unknown	Unknown	9186696	6567139	0.7149	13635	0.427322	Liver	Liver	Liver
SAMN02676503	PRJNA240332	PAIRED	ILLUMINA	Illumina HiSeq 2000	Sus scrofa	Landrace x Yorkshire	Landrace x Yorkshire	Cross	Unknown	Unknown	12902386	9045551	0.7011	15083	0.472703	Liver	Liver	Liver
SAMN02676504	PRJNA240332	PAIRED	ILLUMINA	Illumina HiSeq 2000	Sus scrofa	Landrace x Yorkshire	Landrace x Yorkshire	Cross	Unknown	Unknown	11115426	7851570	0.7064	13964	0.437633	Liver	Liver	Liver
SAMN02676505	PRJNA240332	PAIRED	ILLUMINA	Illumina HiSeq 2000	Sus scrofa	Landrace x Yorkshire	Landrace x Yorkshire	Cross	Unknown	Unknown	11134083	8976297	0.8062	14676	0.459947	Liver	Liver	Liver
SAMN02676506	PRJNA240332	PAIRED	ILLUMINA	Illumina HiSeq 2000	Sus scrofa	Landrace x Yorkshire	Landrace x Yorkshire	Cross	Unknown	Unknown	10237902	8340275	0.8146	13771	0.431585	Liver	Liver	Liver
SAMN02676507	PRJNA240332	PAIRED	ILLUMINA	Illumina HiSeq 2000	Sus scrofa	Landrace x Yorkshire	Landrace x Yorkshire	Cross	Unknown	Unknown	10302993	7873900	0.7642	14205	0.445186	Liver	Liver	Liver
SAMN02676508	PRJNA240332	PAIRED	ILLUMINA	Illumina HiSeq 2000	Sus scrofa	Landrace x Yorkshire	Landrace x Yorkshire	Cross	Unknown	Unknown	9620490	7977459	0.8292	13873	0.434781	Liver	Liver	Liver
SAMN02676509	PRJNA240332	PAIRED	ILLUMINA	Illumina HiSeq 2000	Sus scrofa	Landrace x Yorkshire	Landrace x Yorkshire	Cross	Unknown	Unknown	10479726	8581515	0.8189	14403	0.451392	Liver	Liver	Liver
SAMN02676510	PRJNA240332	PAIRED	ILLUMINA	Illumina HiSeq 2000	Sus scrofa	Landrace x Yorkshire	Landrace x Yorkshire	Cross	Unknown	Unknown	10596838	9121261	0.8608	14392	0.451047	Liver	Liver	Liver
SAMN02676511	PRJNA240332	PAIRED	ILLUMINA	Illumina HiSeq 2000	Sus scrofa	Landrace x Yorkshire	Landrace x Yorkshire	Cross	Unknown	Unknown	10269476	8612444	0.8386	13925	0.436411	Liver	Liver	Liver
SAMN02676512	PRJNA240332	PAIRED	ILLUMINA	Illumina HiSeq 2000	Sus scrofa	Landrace x Yorkshire	Landrace x Yorkshire	Cross	Unknown	Unknown	10264073	8598955	0.8378	14245	0.44644	Liver	Liver	Liver
SAMN02676513	PRJNA240332	PAIRED	ILLUMINA	Illumina HiSeq 2000	Sus scrofa	Landrace x Yorkshire	Landrace x Yorkshire	Cross	Unknown	Unknown	11181550	9600695	0.8586	14390	0.450984	Liver	Liver	Liver
SAMN02676514	PRJNA240332	PAIRED	ILLUMINA	Illumina HiSeq 2000	Sus scrofa	Landrace x Yorkshire	Landrace x Yorkshire	Cross	Unknown	Unknown	11393199	8807250	0.773	13865	0.434531	Liver	Liver	Liver
SAMN02676515	PRJNA240332	PAIRED	ILLUMINA	Illumina HiSeq 2000	Sus scrofa	Landrace x Yorkshire	Landrace x Yorkshire	Cross	Unknown	Unknown	9893946	7827195	0.7911	13978	0.438072	Liver	Liver	Liver
SAMN02676516	PRJNA240332	PAIRED	ILLUMINA	Illumina HiSeq 2000	Sus scrofa	Landrace x Yorkshire	Landrace x Yorkshire	Cross	Unknown	Unknown	9844946	6090422	0.6186	13427	0.420804	Liver	Liver	Liver
SAMN02676517	PRJNA240332	PAIRED	ILLUMINA	Illumina HiSeq 2000	Sus scrofa	Landrace x Yorkshire	Landrace x Yorkshire	Cross	Unknown	Unknown	10167715	8705894	0.8562	14529	0.45534	Liver	Liver	Liver
SAMN02676518	PRJNA240332	PAIRED	ILLUMINA	Illumina HiSeq 2000	Sus scrofa	Landrace x Yorkshire	Landrace x Yorkshire	Cross	Unknown	Unknown	10639034	8933498	0.8397	14438	0.452488	Liver	Liver	Liver
SAMN02676519	PRJNA240332	PAIRED	ILLUMINA	Illumina HiSeq 2000	Sus scrofa	Landrace x Yorkshire	Landrace x Yorkshire	Cross	Unknown	Unknown	6445234	5177222	0.8033	14301	0.448195	Liver	Liver	Liver
SAMN02676520	PRJNA240332	PAIRED	ILLUMINA	Illumina HiSeq 2000	Sus scrofa	Landrace x Yorkshire	Landrace x Yorkshire	Cross	Unknown	Unknown	11137277	8444150	0.7582	13967	0.437727	Liver	Liver	Liver
SAMN02676521	PRJNA240332	PAIRED	ILLUMINA	Illumina HiSeq 2000	Sus scrofa	Landrace x Yorkshire	Landrace x Yorkshire	Cross	Unknown	Unknown	10566162	8814588	0.8342	13759	0.431208	Liver	Liver	Liver
SAMN02676522	PRJNA240332	PAIRED	ILLUMINA	Illumina HiSeq 2000	Sus scrofa	Landrace x Yorkshire	Landrace x Yorkshire	Cross	Unknown	Unknown	11606954	9581540	0.8255	14424	0.45205	Liver	Liver	Liver
SAMN02676523	PRJNA240332	PAIRED	ILLUMINA	Illumina HiSeq 2000	Sus scrofa	Landrace x Yorkshire	Landrace x Yorkshire	Cross	Unknown	Unknown	9089545	7433799	0.8178	14689	0.460355	Liver	Liver	Liver
SAMN02676524	PRJNA240332	PAIRED	ILLUMINA	Illumina HiSeq 2000	Sus scrofa	Landrace x Yorkshire	Landrace x Yorkshire	Cross	Unknown	Unknown	10655838	8568971	0.8042	14279	0.447505	Liver	Liver	Liver
SAMN02676525	PRJNA240332	PAIRED	ILLUMINA	Illumina HiSeq 2000	Sus scrofa	Landrace x Yorkshire	Landrace x Yorkshire	Cross	Unknown	Unknown	13690566	10130569	0.74	14219	0.445625	Liver	Liver	Liver
SAMN02676526	PRJNA240332	PAIRED	ILLUMINA	Illumina HiSeq 2000	Sus scrofa	Landrace x Yorkshire	Landrace x Yorkshire	Cross	Unknown	Unknown	12291435	10383736	0.8448	15073	0.472389	Liver	Liver	Liver
SAMN02676527	PRJNA240332	PAIRED	ILLUMINA	Illumina HiSeq 2000	Sus scrofa	Landrace x Yorkshire	Landrace x Yorkshire	Cross	Unknown	Unknown	10613830	8240165	0.7764	13669	0.428388	Liver	Liver	Liver
SAMN02676528	PRJNA240332	PAIRED	ILLUMINA	Illumina HiSeq 2000	Sus scrofa	Landrace x Yorkshire	Landrace x Yorkshire	Cross	Unknown	Unknown	11450146	9555954	0.8346	14409	0.45158	Liver	Liver	Liver
SAMN02676529	PRJNA240332	PAIRED	ILLUMINA	Illumina HiSeq 2000	Sus scrofa	Landrace x Yorkshire	Landrace x Yorkshire	Cross	Unknown	Unknown	10415856	8569089	0.8227	14070	0.440955	Liver	Liver	Liver
SAMN02676530	PRJNA240332	PAIRED	ILLUMINA	Illumina HiSeq 2000	Sus scrofa	Landrace x Yorkshire	Landrace x Yorkshire	Cross	Unknown	Unknown	12666860	10753328	0.8489	14251	0.446628	Liver	Liver	Liver
SAMN02676531	PRJNA240332	PAIRED	ILLUMINA	Illumina HiSeq 2000	Sus scrofa	Landrace x Yorkshire	Yorkshire	European pigs	Unknown	Unknown	9801666	8322105	0.8491	14298	0.448101	Liver	Liver	Liver
SAMN02676532	PRJNA240332	PAIRED	ILLUMINA	Illumina HiSeq 2000	Sus scrofa	Landrace x Yorkshire	Landrace x Yorkshire	Cross	Unknown	Unknown	7222849	4842122	0.6704	13649	0.427761	Liver	Liver	Liver
SAMN02676533	PRJNA240332	PAIRED	ILLUMINA	Illumina HiSeq 2000	Sus scrofa	Landrace x Yorkshire	Landrace x Yorkshire	Cross	Unknown	Unknown	10926587	9095584	0.8324	14084	0.441394	Liver	Liver	Liver
SAMN02676534	PRJNA240332	PAIRED	ILLUMINA	Illumina HiSeq 2000	Sus scrofa	Landrace x Yorkshire	Unknown	Unknown	Unknown	Unknown	7729	3270	0.4231	387	0.0121286	Unknown	Unknown	Unknown
SAMN02676535	PRJNA240332	PAIRED	ILLUMINA	Illumina HiSeq 2000	Sus scrofa	Landrace x Yorkshire	Landrace x Yorkshire	Cross	Unknown	Unknown	10852632	8155531	0.7515	13892	0.435377	Liver	Liver	Liver
SAMN02676536	PRJNA240332	PAIRED	ILLUMINA	Illumina HiSeq 2000	Sus scrofa	Landrace x Yorkshire	Landrace x Yorkshire	Cross	Unknown	Unknown	8832579	7369286	0.8343	14063	0.440736	Liver	Liver	Liver
SAMN02676537	PRJNA240332	PAIRED	ILLUMINA	Illumina HiSeq 2000	Sus scrofa	Landrace x Yorkshire	Landrace x Yorkshire	Cross	Unknown	Unknown	9360501	6391512	0.6828	14236	0.446158	Liver	Liver	Liver
SAMN02676538	PRJNA240332	PAIRED	ILLUMINA	Illumina HiSeq 2000	Sus scrofa	Landrace x Yorkshire	Landrace x Yorkshire	Cross	Unknown	Unknown	11777541	9855986	0.8368	15043	0.471449	Liver	Liver	Liver
SAMN02676539	PRJNA240332	PAIRED	ILLUMINA	Illumina HiSeq 2000	Sus scrofa	Landrace x Yorkshire	Landrace x Yorkshire	Cross	Unknown	Unknown	10927962	8859558	0.8107	13960	0.437508	Liver	Liver	Liver
SAMN02676540	PRJNA240332	PAIRED	ILLUMINA	Illumina HiSeq 2000	Sus scrofa	Landrace x Yorkshire	Landrace x Yorkshire	Cross	Unknown	Unknown	10736022	8887469	0.8278	14105	0.442052	Liver	Liver	Liver
SAMN02676541	PRJNA240332	PAIRED	ILLUMINA	Illumina HiSeq 2000	Sus scrofa	Landrace x Yorkshire	Landrace x Yorkshire	Cross	Unknown	Unknown	10649844	8406600	0.7894	14057	0.440548	Liver	Liver	Liver
SAMN02676542	PRJNA240332	PAIRED	ILLUMINA	Illumina HiSeq 2000	Sus scrofa	Landrace x Yorkshire	Landrace x Yorkshire	Cross	Unknown	Unknown	10798319	8699424	0.8056	14395	0.451141	Liver	Liver	Liver
SAMN02676543	PRJNA240332	PAIRED	ILLUMINA	Illumina HiSeq 2000	Sus scrofa	Landrace x Yorkshire	Landrace x Yorkshire	Cross	Unknown	Unknown	10966093	8704444	0.7938	14085	0.441425	Liver	Liver	Liver
SAMN02676544	PRJNA240332	PAIRED	ILLUMINA	Illumina HiSeq 2000	Sus scrofa	Landrace x Yorkshire	Landrace x Yorkshire	Cross	Unknown	Unknown	13169490	8994874	0.683	14048	0.440266	Liver	Liver	Liver
SAMN02676545	PRJNA240332	PAIRED	ILLUMINA	Illumina HiSeq 2000	Sus scrofa	Landrace x Yorkshire	Landrace x Yorkshire	Cross	Unknown	Unknown	9849094	7744307	0.7863	14173	0.444183	Liver	Liver	Liver
SAMN02676546	PRJNA240332	PAIRED	ILLUMINA	Illumina HiSeq 2000	Sus scrofa	Landrace x Yorkshire	Landrace x Yorkshire	Cross	Unknown	Unknown	11978021	9915005	0.8278	14246	0.446471	Liver	Liver	Liver
SAMN02676547	PRJNA240332	PAIRED	ILLUMINA	Illumina HiSeq 2000	Sus scrofa	Landrace x Yorkshire	Landrace x Yorkshire	Cross	Unknown	Unknown	9358257	7514272	0.803	14077	0.441175	Liver	Liver	Liver
SAMN02676548	PRJNA240332	PAIRED	ILLUMINA	Illumina HiSeq 2000	Sus scrofa	Landrace x Yorkshire	Landrace x Yorkshire	Cross	Unknown	Unknown	9246781	7840833	0.848	14930	0.467908	Liver	Liver	Liver
SAMN02676549	PRJNA240332	PAIRED	ILLUMINA	Illumina HiSeq 2000	Sus scrofa	Landrace x Yorkshire	Yorkshire	European pigs	Unknown	Unknown	11193922	8317342	0.743	13970	0.437821	Liver	Liver	Liver
SAMN02676550	PRJNA240332	PAIRED	ILLUMINA	Illumina HiSeq 2000	Sus scrofa	Landrace x Yorkshire	Landrace x Yorkshire	Cross	Unknown	Unknown	8606407	6495500	0.7547	13635	0.427322	Liver	Liver	Liver
SAMN02768559	PRJNA246567	PAIRED	ILLUMINA	Illumina Genome Analyzer IIx	Sus scrofa	Unknown	Landrace x Yorkshire	Cross	Female	173 days	23932223	22195777	0.9274	14707	0.460919	Muscle	Muscle	Muscle
SAMN02768560	PRJNA246567	PAIRED	ILLUMINA	Illumina Genome Analyzer IIx	Sus scrofa	Unknown	Landrace x Yorkshire	Cross	Female	179 days	17074784	16029242	0.9388	14416	0.451799	Muscle	Muscle	Muscle
SAMN02768561	PRJNA246567	PAIRED	ILLUMINA	Illumina Genome Analyzer IIx	Sus scrofa	Unknown	Landrace x Yorkshire	Cross	Female	189 days	16726043	15647435	0.9355	13989	0.438417	Muscle	Muscle	Muscle
SAMN02768562	PRJNA246567	PAIRED	ILLUMINA	Illumina Genome Analyzer IIx	Sus scrofa	Unknown	Landrace x Yorkshire	Cross	Male	172 days	20526894	19283382	0.9394	14311	0.448508	Muscle	Muscle	Muscle
SAMN02768563	PRJNA246567	PAIRED	ILLUMINA	Illumina Genome Analyzer IIx	Sus scrofa	Unknown	Landrace x Yorkshire	Cross	Female	173 days	17304351	16215635	0.9371	14498	0.454369	Muscle	Muscle	Muscle
SAMN02768564	PRJNA246567	PAIRED	ILLUMINA	Illumina Genome Analyzer IIx	Sus scrofa	Unknown	Landrace x Yorkshire	Cross	Female	181 days	19313727	18182557	0.9414	13951	0.437226	Muscle	Muscle	Muscle
SAMN02768565	PRJNA246567	PAIRED	ILLUMINA	Illumina Genome Analyzer IIx	Sus scrofa	Unknown	Landrace x Yorkshire	Cross	Female	181 days	16866308	15906504	0.9431	14404	0.451423	Muscle	Muscle	Muscle
SAMN02768566	PRJNA246567	PAIRED	ILLUMINA	Illumina Genome Analyzer IIx	Sus scrofa	Unknown	Landrace x Yorkshire	Cross	Male	179 days	17335020	16319052	0.9414	14458	0.453115	Muscle	Muscle	Muscle
SAMN02768567	PRJNA246567	PAIRED	ILLUMINA	Illumina Genome Analyzer IIx	Sus scrofa	Unknown	Landrace x Yorkshire	Cross	Male	172 days	21606601	20392659	0.9438	14362	0.450107	Muscle	Muscle	Muscle
SAMN02768568	PRJNA246567	PAIRED	ILLUMINA	Illumina Genome Analyzer IIx	Sus scrofa	Unknown	Landrace x Yorkshire	Cross	Male	167 days	19149860	18166926	0.9487	14349	0.449699	Muscle	Muscle	Muscle
SAMN02768569	PRJNA246567	PAIRED	ILLUMINA	Illumina Genome Analyzer IIx	Sus scrofa	Unknown	Landrace x Yorkshire	Cross	Male	172 days	20937431	19773294	0.9444	14265	0.447067	Muscle	Muscle	Muscle
SAMN02768570	PRJNA246567	PAIRED	ILLUMINA	Illumina Genome Analyzer IIx	Sus scrofa	Unknown	Yorkshire	European pigs	Male	186 days	14863693	14050947	0.9453	14294	0.447975	Muscle	Muscle	Muscle
SAMN02904330	PRJNA254496	SINGLE	ABI_SOLID	AB SOLiD 4 System	Sus scrofa	Large white	Unknown	Unknown	Unknown	6 months	10154039	0	0	0	0	Unknown	Unknown	Unknown
SAMN02904331	PRJNA254496	SINGLE	ABI_SOLID	AB SOLiD 4 System	Sus scrofa	Large white	Unknown	Unknown	Unknown	6 months	35930848	0	0	0	0	Unknown	Unknown	Unknown
SAMN02904332	PRJNA254496	SINGLE	ABI_SOLID	AB SOLiD 4 System	Sus scrofa	Large white	Unknown	Unknown	Unknown	6 months	28008347	0	0	0	0	Unknown	Unknown	Unknown
SAMN02904333	PRJNA254496	SINGLE	ABI_SOLID	AB SOLiD 4 System	Sus scrofa	Large white	Unknown	Unknown	Unknown	6 months	27838205	0	0	0	0	Unknown	Unknown	Unknown
SAMN02925400	PRJNA255281	PAIRED	ILLUMINA	Illumina HiSeq 2000	Sus scrofa	Erhualian x Shaziling	Erhualian x Shaziling	Cross	Unknown	14 days	25980746	25123247	0.967	16878	0.528958	Embryo	Embryo	Embryo
SAMN02925407	PRJNA255281	PAIRED	ILLUMINA	Illumina HiSeq 2000	Sus scrofa domesticus	Erhualian x Shaziling	Erhualian x Shaziling	Cross	Unknown	14 days	27001177	26142632	0.9682	16953	0.531309	Embryo	Embryo	Embryo
SAMN03020603	PRJNA260394	PAIRED	ILLUMINA	Illumina HiSeq 2000	Sus scrofa domesticus	BX-cross	BX-cross	Cross	Female	Unknown	34478305	24766174	0.7183	19072	0.597718	Placenta	Placenta	Placenta
SAMN03020617	PRJNA260394	PAIRED	ILLUMINA	Illumina HiSeq 2000	Sus scrofa domesticus	BX-cross	BX-cross	Cross	Female	Unknown	21031216	13976694	0.6646	17882	0.560424	Placenta	Placenta	Placenta
SAMN03031511	PRJNA260632	PAIRED	ILLUMINA	Illumina HiSeq 2500	Sus scrofa	Unknown	Duroc x Luchuan	Cross	Male	Unknown	17609259	16607359	0.9431	18222	0.571079	Adipose	Adipose	Adipose
SAMN03031512	PRJNA260632	PAIRED	ILLUMINA	Illumina HiSeq 2500	Sus scrofa	Unknown	Duroc x Luchuan	Cross	Female	Unknown	19290229	18386631	0.9532	17273	0.541338	Adipose	Adipose	Adipose
SAMN03031513	PRJNA260632	PAIRED	ILLUMINA	Illumina HiSeq 2500	Sus scrofa	Unknown	Duroc x Luchuan	Cross	Male	Unknown	16938073	16178160	0.9551	17013	0.533189	Adipose	Adipose	Adipose
SAMN03031514	PRJNA260632	PAIRED	ILLUMINA	Illumina HiSeq 2500	Sus scrofa	Unknown	Duroc x Luchuan	Cross	Female	Unknown	16161775	15368454	0.9509	17373	0.544472	Adipose	Adipose	Adipose
SAMN03031515	PRJNA260632	PAIRED	ILLUMINA	Illumina HiSeq 2500	Sus scrofa	Unknown	Duroc x Luchuan	Cross	Male	Unknown	16232471	15500024	0.9549	16665	0.522283	Adipose	Adipose	Adipose
SAMN03031516	PRJNA260632	PAIRED	ILLUMINA	Illumina HiSeq 2500	Sus scrofa	Unknown	Duroc x Luchuan	Cross	Male	Unknown	17616343	16770928	0.952	16751	0.524978	Adipose	Adipose	Adipose
SAMN03031517	PRJNA260632	PAIRED	ILLUMINA	Illumina HiSeq 2500	Sus scrofa	Unknown	Duroc x Luchuan	Cross	Female	Unknown	18332179	17443611	0.9515	17493	0.548232	Adipose	Adipose	Adipose
SAMN03031518	PRJNA260632	PAIRED	ILLUMINA	Illumina HiSeq 2500	Sus scrofa	Unknown	Duroc x Luchuan	Cross	Female	Unknown	15158714	14404061	0.9502	17093	0.535696	Adipose	Adipose	Adipose
SAMN03031519	PRJNA260632	PAIRED	ILLUMINA	Illumina HiSeq 2500	Sus scrofa	Unknown	Duroc x Luchuan	Cross	Male	Unknown	14979365	14298413	0.9545	17245	0.54046	Adipose	Adipose	Adipose
SAMN03031520	PRJNA260632	PAIRED	ILLUMINA	Illumina HiSeq 2500	Sus scrofa	Unknown	Duroc x Luchuan	Cross	Male	Unknown	16835171	16011100	0.9511	16868	0.528645	Adipose	Adipose	Adipose
SAMN03031521	PRJNA260632	PAIRED	ILLUMINA	Illumina HiSeq 2500	Sus scrofa	Unknown	Duroc x Luchuan	Cross	Male	Unknown	15437458	14686926	0.9514	17372	0.54444	Adipose	Adipose	Adipose
SAMN03031522	PRJNA260632	PAIRED	ILLUMINA	Illumina HiSeq 2500	Sus scrofa	Unknown	Duroc x Landrace/Yorkshire	Cross	Female	Unknown	15217647	14503620	0.9531	17394	0.54513	Adipose	Adipose	Adipose
SAMN03031523	PRJNA260632	PAIRED	ILLUMINA	Illumina HiSeq 2500	Sus scrofa	Unknown	Duroc x Luchuan	Cross	Female	Unknown	16177320	15395188	0.9517	16762	0.525323	Adipose	Adipose	Adipose
SAMN03031524	PRJNA260632	PAIRED	ILLUMINA	Illumina HiSeq 2500	Sus scrofa	Unknown	Duroc x Luchuan	Cross	Male	Unknown	15845623	15109878	0.9536	16744	0.524759	Adipose	Adipose	Adipose
SAMN03031525	PRJNA260632	PAIRED	ILLUMINA	Illumina HiSeq 2500	Sus scrofa	Unknown	Duroc x Luchuan	Cross	Female	Unknown	17887978	17001084	0.9504	17355	0.543907	Adipose	Adipose	Adipose
SAMN03031526	PRJNA260632	PAIRED	ILLUMINA	Illumina HiSeq 2500	Sus scrofa	Unknown	Duroc x Luchuan	Cross	Female	Unknown	15544633	14800496	0.9521	17104	0.536041	Adipose	Adipose	Adipose
SAMN03031527	PRJNA260632	PAIRED	ILLUMINA	Illumina HiSeq 2500	Sus scrofa	Unknown	Duroc x Luchuan	Cross	Female	Unknown	17229991	16398754	0.9518	17185	0.53858	Adipose	Adipose	Adipose
SAMN03031528	PRJNA260632	PAIRED	ILLUMINA	Illumina HiSeq 2500	Sus scrofa	Unknown	Duroc x Luchuan	Cross	Female	Unknown	16369833	15595050	0.9527	16948	0.531152	Adipose	Adipose	Adipose
SAMN03031529	PRJNA260632	PAIRED	ILLUMINA	Illumina HiSeq 2500	Sus scrofa	Unknown	Duroc x Luchuan	Cross	Male	Unknown	17416961	16597578	0.953	18336	0.574652	Adipose	Adipose	Adipose
SAMN03031530	PRJNA260632	PAIRED	ILLUMINA	Illumina HiSeq 2500	Sus scrofa	Unknown	Duroc x Luchuan	Cross	Male	Unknown	17450643	16610333	0.9518	17148	0.53742	Adipose	Adipose	Adipose
SAMN03031531	PRJNA260632	PAIRED	ILLUMINA	Illumina HiSeq 2500	Sus scrofa	Unknown	Duroc x Luchuan	Cross	Female	Unknown	16356148	14503878	0.8868	16852	0.528143	Adipose	Adipose	Adipose
SAMN03031532	PRJNA260632	PAIRED	ILLUMINA	Illumina HiSeq 2500	Sus scrofa	Unknown	Duroc x Luchuan	Cross	Male	Unknown	16566960	15805215	0.954	16718	0.523944	Adipose	Adipose	Adipose
SAMN03031533	PRJNA260632	PAIRED	ILLUMINA	Illumina HiSeq 2500	Sus scrofa	Unknown	Duroc x Luchuan	Cross	Male	Unknown	15603373	14876445	0.9534	16743	0.524727	Adipose	Adipose	Adipose
SAMN03031534	PRJNA260632	PAIRED	ILLUMINA	Illumina HiSeq 2500	Sus scrofa	Unknown	Duroc x Luchuan	Cross	Male	Unknown	15272435	14385826	0.9419	17008	0.533032	Adipose	Adipose	Adipose
SAMN03031535	PRJNA260632	PAIRED	ILLUMINA	Illumina HiSeq 2500	Sus scrofa	Unknown	Duroc x Landrace/Yorkshire	Cross	Female	Unknown	17657308	16692361	0.9454	16944	0.531027	Adipose	Adipose	Adipose
SAMN03031536	PRJNA260632	PAIRED	ILLUMINA	Illumina HiSeq 2500	Sus scrofa	Unknown	Duroc x Luchuan	Cross	Female	Unknown	18332625	17324647	0.945	17130	0.536856	Adipose	Adipose	Adipose
SAMN03031537	PRJNA260632	PAIRED	ILLUMINA	Illumina HiSeq 2500	Sus scrofa	Unknown	Duroc x Luchuan	Cross	Female	Unknown	18061297	17094470	0.9465	16884	0.529146	Adipose	Adipose	Adipose
SAMN03031538	PRJNA260632	PAIRED	ILLUMINA	Illumina HiSeq 2500	Sus scrofa	Unknown	Duroc x Luchuan	Cross	Male	Unknown	17183790	16396928	0.9542	16624	0.520998	Adipose	Adipose	Adipose
SAMN03031539	PRJNA260632	PAIRED	ILLUMINA	Illumina HiSeq 2500	Sus scrofa	Unknown	Duroc x Luchuan	Cross	Male	Unknown	16706437	15947057	0.9545	16925	0.530431	Adipose	Adipose	Adipose
SAMN03031540	PRJNA260632	PAIRED	ILLUMINA	Illumina HiSeq 2500	Sus scrofa	Unknown	Duroc x Luchuan	Cross	Male	Unknown	16038751	15315774	0.9549	16777	0.525793	Adipose	Adipose	Adipose
SAMN03031541	PRJNA260632	PAIRED	ILLUMINA	Illumina HiSeq 2500	Sus scrofa	Unknown	Duroc x Luchuan	Cross	Female	Unknown	13731415	13087436	0.9531	16819	0.527109	Adipose	Adipose	Adipose
SAMN03031542	PRJNA260632	PAIRED	ILLUMINA	Illumina HiSeq 2500	Sus scrofa	Unknown	Duroc x Luchuan	Cross	Male	Unknown	17603846	16826592	0.9558	16686	0.522941	Adipose	Adipose	Adipose
SAMN03031543	PRJNA260632	PAIRED	ILLUMINA	Illumina HiSeq 2500	Sus scrofa	Unknown	Duroc x Luchuan	Cross	Female	Unknown	14193134	13523596	0.9528	16992	0.532531	Adipose	Adipose	Adipose
SAMN03031544	PRJNA260632	PAIRED	ILLUMINA	Illumina HiSeq 2500	Sus scrofa	Unknown	Duroc x Luchuan	Cross	Female	Unknown	16652145	15843806	0.9515	17019	0.533377	Adipose	Adipose	Adipose
SAMN03031545	PRJNA260632	PAIRED	ILLUMINA	Illumina HiSeq 2500	Sus scrofa	Unknown	Duroc x Luchuan	Cross	Male	Unknown	17157071	16331273	0.9519	17277	0.541463	Adipose	Adipose	Adipose
SAMN03031546	PRJNA260632	PAIRED	ILLUMINA	Illumina HiSeq 2500	Sus scrofa	Unknown	Duroc x Luchuan	Cross	Male	Unknown	17512112	16725692	0.9551	17721	0.555378	Adipose	Adipose	Adipose
SAMN03142843	PRJNA264829	PAIRED	ILLUMINA	Illumina HiSeq 2000	Sus scrofa	Chinese Wuzhishan	Chinese Wuzhishan	Asian pigs	Unknown	7 months	16323490	15464650	0.9474	15280	0.478877	Liver	Liver	Liver
SAMN03142844	PRJNA264829	PAIRED	ILLUMINA	Illumina HiSeq 2000	Sus scrofa	Chinese Wuzhishan	Chinese Wuzhishan	Asian pigs	Unknown	7 months	22922790	21807321	0.9513	16016	0.501943	Liver	Liver	Liver
SAMN03142845	PRJNA264829	PAIRED	ILLUMINA	Illumina HiSeq 2000	Sus scrofa	Chinese Wuzhishan	Chinese Wuzhishan	Asian pigs	Unknown	7 months	20498882	19417839	0.9473	15732	0.493042	Liver	Liver	Liver
SAMN03198886	PRJNA267635	SINGLE	ILLUMINA	Illumina HiSeq 2000	Sus scrofa	Unknown	Unknown	Unknown	Male	Unknown	30638359	36041	0.0012	263	0.00824245	Unknown	Unknown	Unknown
SAMN03247882	PRJNA269052	PAIRED	ILLUMINA	Illumina HiSeq 2000	Sus scrofa	Unknown	Unknown	Unknown	Unknown	Unknown	47057589	41656398	0.8852	16372	0.5131	Unknown	Other	Other	Outlier
SAMN03252001	PRJNA269140	PAIRED	ILLUMINA	Illumina HiSeq 2000	Sus scrofa	Unknown	Unknown	Unknown	Unknown	Unknown	23393399	20510519	0.8768	16673	0.522534	Unknown	Other	Other	Outlier
SAMN03252002	PRJNA269140	PAIRED	ILLUMINA	Illumina HiSeq 2000	Sus scrofa	Unknown	Unknown	Unknown	Unknown	Unknown	23664190	21145879	0.8936	15415	0.483108	Unknown	Other	Other	Outlier
SAMN03273387	PRJNA271310	PAIRED	ILLUMINA	Illumina HiSeq 2000	Sus scrofa	Meishan	Unknown	Unknown	Male	35 days	61204395	36205299	0.5915	16821	0.527172	Unknown	Unknown	Unknown
SAMN03273895	PRJNA271310	PAIRED	ILLUMINA	Illumina HiSeq 2000	Sus scrofa	Meishan	Meishan	Asian pigs	Male	35 days	66188675	41167764	0.622	16560	0.518992	Duodenum	Small intestine	Duodenum
SAMN03273896	PRJNA271310	PAIRED	ILLUMINA	Illumina HiSeq 2000	Sus scrofa	Meishan	Unknown	Unknown	Male	35 days	61098711	34927819	0.5717	16717	0.523912	Unknown	Unknown	Unknown
SAMN03273897	PRJNA271310	PAIRED	ILLUMINA	Illumina HiSeq 2000	Sus scrofa	Meishan	Meishan	Asian pigs	Male	35 days	66554515	42736070	0.6421	16557	0.518898	Duodenum	Small intestine	Duodenum
SAMN03273910	PRJNA271310	PAIRED	ILLUMINA	Illumina HiSeq 2000	Sus scrofa	Meishan	Meishan	Asian pigs	Male	35 days	34846395	31850525	0.914	18050	0.565689	Duodenum	Small intestine	Duodenum
SAMN03273911	PRJNA271310	PAIRED	ILLUMINA	Illumina HiSeq 2000	Sus scrofa	Meishan	Meishan	Asian pigs	Male	35 days	30653750	27900488	0.9102	17821	0.558512	Duodenum	Small intestine	Duodenum
SAMN03294341	PRJNA271508	SINGLE	ILLUMINA	Illumina HiSeq 2000	Sus scrofa	Tongcheng	Unknown	Unknown	Unknown	0 day	5754380	38	0	0	0	Unknown	Unknown	Unknown
[truncated: 7,532 more rows]

## Sheet: Table S2
Table S2. Detailed information of WGS data in the Pig Genomics Reference Panel (PGRP v0).
BioSample	BioProject	Breed	Breed Category	Read depth	Genome coverage	Sex	Clean reads	Maped reads	Maped rate	Note
SAMC070477	PRJCA001440	Chinese wild	Asian wild pig (ASW)	2.63	0.8207	F	101999082	85456170	0.8378
SAMC070478	PRJCA001440	Chinese wild	Asian wild pig (ASW)	3.24	0.5245	F	100864424	94962094	0.9415
SAMC070479	PRJCA001440	Chinese wild	Asian wild pig (ASW)	3.75	0.6953	M	110783692	107428684	0.9697
SAMC070480	PRJCA001440	Chinese wild	Asian wild pig (ASW)	1.48	0.5328	M	43604295	42503686	0.9748
SAMC070481	PRJCA001440	Chinese wild	Asian wild pig (ASW)	4.02	0.7743	M	118084062	114993208	0.9738
SAMC070482	PRJCA001440	Chinese wild	Asian wild pig (ASW)	4.93	0.8218	F	150599265	142173619	0.9441
SAMC070483	PRJCA001440	Chinese wild	Asian wild pig (ASW)	4.42	0.7106	M	128922007	123281517	0.9562
SAMC070484	PRJCA001440	Chinese wild	Asian wild pig (ASW)	4.9	0.8104	F	141501557	136370769	0.9637
SAMC070485	PRJCA001440	Chinese wild	Asian wild pig (ASW)	0.61	0.3009	F	21069760	19865775	0.9429
SAMC070486	PRJCA001440	Tibetan	Asian domestic pig (ASD)	4.93	0.9376	F	139526290	137235716	0.9836
SAMC070487	PRJCA001440	Tibetan	Asian domestic pig (ASD)	2.94	0.7	F	91783743	87794001	0.9565
SAMC070488	PRJCA001440	Tibetan	Asian domestic pig (ASD)	6.72	0.9502	F	193838701	187448673	0.967
SAMC070489	PRJCA001440	Tibetan	Asian domestic pig (ASD)	1.89	0.5936	M	58279521	56265333	0.9654
SAMC070490	PRJCA001440	Tibetan	Asian domestic pig (ASD)	4.81	0.9188	M	147380274	141306107	0.9588
SAMC070491	PRJCA001440	Tibetan	Asian domestic pig (ASD)	4.2	0.9571	F	137689142	125770816	0.9134
SAMC070492	PRJCA001440	Tibetan	Asian domestic pig (ASD)	4.02	0.9456	M	131681089	120375244	0.9141
SAMC070493	PRJCA001440	Tibetan	Asian domestic pig (ASD)	3.22	0.9238	M	94124845	89300544	0.9487
SAMC070494	PRJCA001440	Tibetan	Asian domestic pig (ASD)	1.86	0.7928	M	62406396	56753671	0.9094
SAMC070495	PRJCA001440	Tibetan	Asian domestic pig (ASD)	2.38	0.8736	F	69734852	66567054	0.9546
SAMC070496	PRJCA001440	Tibetan	Asian domestic pig (ASD)	3.82	0.941	F	129617361	116967898	0.9024
SAMC070497	PRJCA001440	Xiang	Asian domestic pig (ASD)	6.28	0.9575	F	201749308	193543185	0.9593
SAMC070498	PRJCA001440	Xiang	Asian domestic pig (ASD)	6.99	0.9591	F	215123528	205787572	0.9566
SAMC070499	PRJCA001440	Xiang	Asian domestic pig (ASD)	6.93	0.9205	F	202871210	195092553	0.9617
SAMC070500	PRJCA001440	Xiang	Asian domestic pig (ASD)	5.52	0.9249	F	193237456	175077967	0.906
SAMC070501	PRJCA001440	Xiang	Asian domestic pig (ASD)	6.57	0.9326	F	191816295	184671143	0.9628
SAMC070502	PRJCA001440	Xiang	Asian domestic pig (ASD)	1.86	0.6999	M	53593725	50349841	0.9395
SAMC070503	PRJCA001440	Xiang	Asian domestic pig (ASD)	1.87	0.7143	M	51444029	49343653	0.9592
SAMC070504	PRJCA001440	Xiang	Asian domestic pig (ASD)	1.78	0.6894	M	48611237	46612239	0.9589
SAMC070505	PRJCA001440	Xiang	Asian domestic pig (ASD)	2.43	0.7714	M	89252500	79942823	0.8957
SAMC070506	PRJCA001440	Rongchang	Asian domestic pig (ASD)	2.59	0.8593	F	83136778	74067826	0.8909
SAMC070507	PRJCA001440	Laiwu	Asian domestic pig (ASD)	5.57	0.9304	F	190388686	173473159	0.9112
SAMC070508	PRJCA001440	Laiwu	Asian domestic pig (ASD)	6.47	0.9049	M	190710427	184844944	0.9692
SAMC070509	PRJCA001440	Laiwu	Asian domestic pig (ASD)	6.05	0.8139	M	181422194	176313946	0.9718
SAMC070510	PRJCA001440	Laiwu	Asian domestic pig (ASD)	5.24	0.9365	M	164489962	158391648	0.9629
SAMC070511	PRJCA001440	Laiwu	Asian domestic pig (ASD)	6.28	0.9492	F	201287434	192460492	0.9561
SAMC070512	PRJCA001440	Laiwu	Asian domestic pig (ASD)	1.99	0.5986	M	57151083	54363341	0.9512
SAMC070513	PRJCA001440	Laiwu	Asian domestic pig (ASD)	1.17	0.5493	M	31090085	29928805	0.9626
SAMC070514	PRJCA001440	Laiwu	Asian domestic pig (ASD)	1.78	0.6369	F	48469405	46383042	0.957
SAMC070515	PRJCA001440	Laiwu	Asian domestic pig (ASD)	1.5	0.5867	M	40187873	38524256	0.9586
SAMC070516	PRJCA001440	Laiwu	Asian domestic pig (ASD)	2.62	0.8263	F	88361787	82310172	0.9315
SAMC070517	PRJCA001440	Wei	Asian domestic pig (ASD)	4.69	0.9567	F	138784824	130665476	0.9415
SAMC070518	PRJCA001440	Wanzhe	Asian domestic pig (ASD)	2.2	0.8311	M	62065905	59981153	0.9664
SAMC070519	PRJCA001440	Jinhua	Asian domestic pig (ASD)	3.78	0.9129	F	110524285	104201000	0.9428
SAMC070520	PRJCA001440	Jiaxing	Asian domestic pig (ASD)	3.31	0.9068	F	97759318	92128709	0.9424
SAMC070521	PRJCA001440	Large_Black-white	European domestic pig (EUD)	3.77	0.9334	M	107547063	103147954	0.9591
SAMC070522	PRJCA001440	Lantang	Asian domestic pig (ASD)	4.43	0.9513	M	125201333	120808571	0.9649
SAMC070523	PRJCA001440	Hang	Asian domestic pig (ASD)	4.3	0.9322	M	125849403	119350111	0.9484
SAMC070524	PRJCA001440	Putianhei	Asian domestic pig (ASD)	2.63	0.7858	M	76523496	72493894	0.9473
SAMC146520	PRJCA002378	Phacochoerus africanus	Suidae but not Sus scrofa (SUI)	36.28	0.977	M	670435573	648909938	0.9679
SAMC146521	PRJCA002378	Phacochoerus africanus	Suidae but not Sus scrofa (SUI)	39.96	0.9774	M	735477341	715758693	0.9732
SAMC146522	PRJCA002378	Phacochoerus africanus	Suidae but not Sus scrofa (SUI)	38.35	0.9772	M	700637178	680629807	0.9714
SAMC146523	PRJCA002378	Phacochoerus africanus	Suidae but not Sus scrofa (SUI)	39.19	0.9749	F	696711883	683905525	0.9816
SAMC146524	PRJCA002378	Phacochoerus africanus	Suidae but not Sus scrofa (SUI)	40.03	0.975	F	710462323	697535668	0.9818
SAMC146525	PRJCA002378	Phacochoerus africanus	Suidae but not Sus scrofa (SUI)	42.83	0.9759	F	780869414	755787569	0.9679
SAMC146526	PRJCA002378	Phacochoerus africanus	Suidae but not Sus scrofa (SUI)	39.52	0.9756	F	718393597	697410751	0.9708
SAMC146527	PRJCA002378	Phacochoerus africanus	Suidae but not Sus scrofa (SUI)	36.89	0.977	M	676383442	656450597	0.9705
SAMC146528	PRJCA002378	Phacochoerus africanus	Suidae but not Sus scrofa (SUI)	37.76	0.9753	F	678918311	665571828	0.9803
SAMC146529	PRJCA002378	Potamochoerus porcus	Suidae but not Sus scrofa (SUI)	33.23	0.9787	M	617227724	595365397	0.9646
SAMC070521	PRJEB1683	Landrace	European domestic pig (EUD)	5.54	0.8013	F	148731151	147258952	0.9901
SAMC070522	PRJEB1683	Landrace	European domestic pig (EUD)	10.51	0.8135	F	278629043	276930159	0.9939
SAMEA1557383	PRJEB1683	Yorkshire	European domestic pig (EUD)	6.84	0.8076	F	177413614	176240925	0.9934
SAMEA1557384	PRJEB1683	Sus Verrucosus	Suidae but not Sus scrofa (SUI)	9.7	0.801	M	281680052	281457755	0.9992
SAMEA1557389	PRJEB1683	Yorkshire	European domestic pig (EUD)	8.78	0.8077	F	236713569	235285492	0.994
SAMEA1557392	PRJEB1683	Pietrain	European domestic pig (EUD)	6.39	0.7901	M	178432566	177540576	0.995
SAMEA1557393	PRJEB1683	Sus Celebensis	Suidae but not Sus scrofa (SUI)	16.87	0.8128	F	509893320	500030163	0.9807
SAMEA1557399	PRJEB1683	Yorkshire	European domestic pig (EUD)	6.71	0.8084	F	173320994	172333256	0.9943
SAMEA1557402	PRJEB1683	Yorkshire	European domestic pig (EUD)	7.12	0.813	F	188804428	186866045	0.9897
SAMEA1557403	PRJEB1683	Switzerland	European wild pig (EUW)	11.47	0.8112	F	302225469	302041911	0.9994
SAMEA1557404	PRJEB1683	Yorkshire	European domestic pig (EUD)	6.55	0.8075	F	170209360	169107741	0.9935
SAMEA1557406	PRJEB1683	Yorkshire	European domestic pig (EUD)	7.47	0.8148	F	199075409	196832565	0.9887
SAMEA1557407	PRJEB1683	Duroc	European domestic pig (EUD)	8.2	0.8112	M	220528176	219590150	0.9957
SAMEA1557409	PRJEB1683	Sus Cebifrons	Suidae but not Sus scrofa (SUI)	7.7	0.7965	F	198918708	198783227	0.9993
SAMEA1557412	PRJEB1683	Yorkshire	European domestic pig (EUD)	4.19	0.7618	F	114953224	114149386	0.993
SAMEA1557414	PRJEB1683	Sumatra	Suidae but not Sus scrofa (SUI)	8.21	0.7962	F	233273134	229627272	0.9844
SAMEA1557415	PRJEB1683	Yorkshire	European domestic pig (EUD)	7.71	0.8142	F	208189052	206985767	0.9942
SAMEA1557417	PRJEB1683	Sumatra	Suidae but not Sus scrofa (SUI)	7.95	0.7949	F	222361080	220900499	0.9934
SAMEA1557418	PRJEB1683	OM001_Warthog	Suidae but not Sus scrofa (SUI)	8.79	0.7696	F	240428504	238232777	0.9909
SAMEA1557419	PRJEB1683	Duroc	European domestic pig (EUD)	8.74	0.805	F	237924087	236078951	0.9922
SAMEA1557422	PRJEB1683	Yorkshire	European domestic pig (EUD)	7.17	0.7808	F	196374769	193573650	0.9857
SAMEA1557425	PRJEB1683	Yorkshire	European domestic pig (EUD)	7.3	0.8086	F	187756650	186632201	0.994
SAMEA1557427	PRJEB1683	Yorkshire	European domestic pig (EUD)	6.54	0.8074	F	168488569	167211376	0.9924
SAMEA1557429	PRJEB1683	Sus Barbatus	Suidae but not Sus scrofa (SUI)	5.14	0.7691	F	137035214	136920468	0.9992
SAMEA1557430	PRJEB1683	Pietrain	European domestic pig (EUD)	8.13	0.8027	F	216426276	215701598	0.9967
SAMEA1557431	PRJEB1683	Yorkshire	European domestic pig (EUD)	7.74	0.8131	F	207548761	206411328	0.9945
SAMEA1557432	PRJEB1683	Pietrain	European domestic pig (EUD)	7.97	0.809	F	220126610	218765344	0.9938
SAMEA1557435	PRJEB1683	Yorkshire	European domestic pig (EUD)	7.05	0.8057	M	196097583	194764994	0.9932
SAMEA2612507	PRJEB1683	Asian domestic	Asian domestic pig (ASD)	7.61	0.8143	M	204494491	201910207	0.9874
SAMEA2612508	PRJEB1683	Asian domestic	Asian domestic pig (ASD)	7.77	0.8176	M	204507446	202149303	0.9885
SAMEA2612509	PRJEB1683	Asian domestic	Asian domestic pig (ASD)	5.68	0.8074	M	152933070	150958802	0.9871
SAMEA2612510	PRJEB1683	Asian domestic	Asian domestic pig (ASD)	6.33	0.8118	M	169923840	167475775	0.9856
SAMEA2612511	PRJEB1683	Asian domestic	Asian domestic pig (ASD)	7.89	0.8169	M	207817387	205369715	0.9882
SAMEA2612512	PRJEB1683	Asian domestic	Asian domestic pig (ASD)	6.58	0.8131	M	176989696	174371718	0.9852
SAMEA2612513	PRJEB1683	European wild	European wild pig (EUW)	7.33	0.8157	F	196647637	190840595	0.9705
SAMEA2612514	PRJEB1683	European wild	European wild pig (EUW)	8.82	0.8194	F	236178737	229288027	0.9708
SAMEA2612515	PRJEB1683	European wild	European wild pig (EUW)	10.3	0.8192	M	273621040	266645467	0.9745
SAMEA2612516	PRJEB1683	European wild	European wild pig (EUW)	6.54	0.8128	F	175507237	170236227	0.97
SAMEA2612517	PRJEB1683	European wild	European wild pig (EUW)	6.28	0.8118	F	168131726	163217514	0.9708
SAMEA2612518	PRJEB1683	European wild	European wild pig (EUW)	8.33	0.818	M	223048535	216630909	0.9712
SAMEA2612519	PRJEB1683	Asian wild	Asian wild pig (ASW)	6.69	0.8149	F	176371563	174223710	0.9878
SAMEA2612520	PRJEB1683	Asian wild	Asian wild pig (ASW)	9.55	0.8213	F	251110846	248295847	0.9888
SAMEA2612521	PRJEB1683	Asian wild	Asian wild pig (ASW)	8.77	0.8209	M	228039077	226047327	0.9913
SAMEA2612522	PRJEB1683	European wild	European wild pig (EUW)	8.68	0.8198	M	228258493	225713546	0.9889
SAMEA2612523	PRJEB1683	European wild	European wild pig (EUW)	7.65	0.8201	F	205792256	202784908	0.9854
SAMEA2612524	PRJEB1683	European wild	European wild pig (EUW)	9.54	0.8237	F	251628251	248631560	0.9881
SAMEA2612525	PRJEB1683	European wild	European wild pig (EUW)	9.18	0.8224	F	241436281	238683646	0.9886
SAMEA2612526	PRJEB1683	European wild	European wild pig (EUW)	8.13	0.8199	F	212513485	210124673	0.9888
SAMEA2628062	PRJEB1683	Asian domestic	Asian domestic pig (ASD)	7.61	0.8143	M	204494491	201910207	0.9874
SAMEA2628063	PRJEB1683	Asian domestic	Asian domestic pig (ASD)	7.77	0.8176	M	204507446	202149303	0.9885
SAMEA5059488	PRJEB29465	Duroc	European domestic pig (EUD)	12.05	0.9934	M	238561040	230638943	0.9668
SAMEA5059489	PRJEB29465	Duroc	European domestic pig (EUD)	16.93	0.9944	M	332508965	321862938	0.968
SAMEA5059490	PRJEB29465	Pietrain x Swiss Landrace	European domestic pig (EUD)	10.44	0.9921	M	209535674	201121988	0.9598
SAMEA5059491	PRJEB29465	Pietrain x Swiss Landrace	European domestic pig (EUD)	13.14	0.9934	M	260839146	251003312	0.9623
SAMEA5059492	PRJEB29465	Switzerland	European wild pig (EUW)	14.19	0.9924	M	268000283	259760859	0.9693
SAMEA5730044	PRJEB29465	KuneKune	European domestic pig (EUD)	19.33	0.9901	F	353234848	345435155	0.9779
SAMEA5730045	PRJEB29465	Casertana	European domestic pig (EUD)	13.74	0.9899	F	252094837	246394171	0.9774
SAMEA5730046	PRJEB29465	Schweizer_Edelschwein	European domestic pig (EUD)	15.61	0.9937	M	294033290	287141643	0.9766
SAMEA5730047	PRJEB29465	Pietrain	European domestic pig (EUD)	15.92	0.9934	M	300642895	293559459	0.9764
SAMEA5730048	PRJEB29465	KuneKune	European domestic pig (EUD)	13.87	0.9923	M	287724038	258798311	0.8995
SAMEA5730049	PRJEB29465	Casertana	European domestic pig (EUD)	36.24	0.9948	M	621149502	616020875	0.9917
SAMEA5730050	PRJEB29465	Pietrain	European domestic pig (EUD)	25.12	0.9943	M	429758797	426723135	0.9929
SAMEA5730051	PRJEB29465	Pietrain	European domestic pig (EUD)	25.56	0.9942	M	437702378	434652070	0.993
SAMEA5730052	PRJEB29465	Pietrain	European domestic pig (EUD)	17.05	0.9897	F	291213897	289310351	0.9935
SAMEA5730053	PRJEB29465	Pietrain	European domestic pig (EUD)	21.47	0.9892	F	368519056	365663055	0.9923
SAMEA5151076	PRJEB30129	Porcula salvania	Suidae but not Sus scrofa (SUI)	14.36	0.9745	M	416414433	393444456	0.9448
SAMEA5151077	PRJEB30129	Porcula salvania	Suidae but not Sus scrofa (SUI)	9.6	0.9606	F	291371945	274057716	0.9406
SAMEA5151078	PRJEB30129	Porcula salvania	Suidae but not Sus scrofa (SUI)	36.45	0.9803	F	1009862318	959757014	0.9504
SAMEA5151079	PRJEB30129	Porcula salvania	Suidae but not Sus scrofa (SUI)	13.54	0.9713	F	421549489	381381266	0.9047
SAMEA5151080	PRJEB30129	Porcula salvania	Suidae but not Sus scrofa (SUI)	11.47	0.97	M	335304139	319900699	0.9541
SAMEA5151081	PRJEB30129	Porcula salvania	Suidae but not Sus scrofa (SUI)	14.11	0.9749	F	421602641	395790432	0.9388
SAMEA5150766	PRJEB30129	Babyrousa babyrussa	Suidae but not Sus scrofa (SUI)	10.33	0.9621	M	286325277	275789293	0.9632
SAMC146520	PRJEB30282	Landrace	European domestic pig (EUD)	7.37	0.8126	M	191536539	188227874	0.9827
SAMC146521	PRJEB30282	Landrace	European domestic pig (EUD)	10.83	0.8208	M	281224416	276414765	0.9829
SAMC146522	PRJEB30282	Landrace	European domestic pig (EUD)	7.3	0.8132	M	189029321	185959392	0.9838
SAMC146524	PRJEB30282	Landrace	European domestic pig (EUD)	7.06	0.8015	M	182545242	179563677	0.9837
SAMC146527	PRJEB30282	Landrace	European domestic pig (EUD)	8.84	0.8164	M	229530129	225558204	0.9827
SAMC146528	PRJEB30282	Landrace	European domestic pig (EUD)	8.14	0.8159	M	211702335	207921065	0.9821
SAMEA5772911	PRJEB30282	Yorkshire	European domestic pig (EUD)	8.04	0.8144	F	211790880	209909347	0.9911
SAMEA5772912	PRJEB30282	Yorkshire	European domestic pig (EUD)	9.46	0.8168	F	249453343	246511489	0.9882
SAMEA5772913	PRJEB30282	Yorkshire	European domestic pig (EUD)	4.69	0.7615	M	121845478	120701463	0.9906
SAMEA5772914	PRJEB30282	Yorkshire	European domestic pig (EUD)	6.78	0.792	F	174973440	172187518	0.9841
SAMEA5772915	PRJEB30282	Yorkshire	European domestic pig (EUD)	9.41	0.817	M	241871185	240190245	0.9931
SAMEA5772916	PRJEB30282	Yorkshire	European domestic pig (EUD)	9.19	0.8131	M	240347791	237032109	0.9862
SAMEA5772917	PRJEB30282	Yorkshire	European domestic pig (EUD)	8.41	0.8157	M	219335335	217860981	0.9933
SAMEA5772918	PRJEB30282	Yorkshire	European domestic pig (EUD)	7.29	0.7999	M	190257268	189052924	0.9937
SAMEA5772919	PRJEB30282	Yorkshire	European domestic pig (EUD)	9.91	0.8173	M	261576501	258342684	0.9876
SAMEA5772920	PRJEB30282	Yorkshire	European domestic pig (EUD)	9.13	0.8168	M	238786232	236839556	0.9918
SAMEA5772921	PRJEB30282	Yorkshire	European domestic pig (EUD)	10.05	0.8174	M	261266886	258780836	0.9905
SAMEA5772922	PRJEB30282	Pietrain	European domestic pig (EUD)	9.39	0.8107	F	250873827	247316842	0.9858
SAMEA5772923	PRJEB30282	Pietrain	European domestic pig (EUD)	9.6	0.8111	F	255168510	251940276	0.9873
SAMEA5772924	PRJEB30282	Pietrain	European domestic pig (EUD)	11.02	0.8194	F	288168766	284945411	0.9888
SAMEA5772925	PRJEB30282	Duroc	European domestic pig (EUD)	9.1	0.8117	M	238301345	235938658	0.9901
SAMEA5772926	PRJEB30282	Hampshire	European domestic pig (EUD)	9.68	0.8118	M	258380627	254480188	0.9849
SAMEA5772927	PRJEB30282	Hampshire	European domestic pig (EUD)	9.9	0.8139	M	260674723	258084777	0.9901
SAMEA6141235	PRJEB35180	Phacochoerus africanus	Suidae but not Sus scrofa (SUI)	14.72	0.9637	F	431559127	416473336	0.965
SAMEA6141236	PRJEB35180	Potomochoerus larvatus	Suidae but not Sus scrofa (SUI)	10.56	0.9749	M	309145289	292087297	0.9448
SAMEA6141237	PRJEB35180	Potomochoerus porcus	Suidae but not Sus scrofa (SUI)	10.03	0.9752	M	294865358	278012906	0.9428
SAMEA6141238	PRJEB35180	Sus Barbatus	Suidae but not Sus scrofa (SUI)	10.35	0.9848	F	301274419	287695077	0.9549
SAMEA6141239	PRJEB35180	Sus Barbatus	Suidae but not Sus scrofa (SUI)	17.87	0.9898	M	367509317	352854840	0.9601
SAMEA6141240	PRJEB35180	Sus Barbatus	Suidae but not Sus scrofa (SUI)	10.67	0.9881	M	306304699	293769107	0.9591
SAMEA6141241	PRJEB35180	Sus Cebifrons	Suidae but not Sus scrofa (SUI)	11.27	0.9797	F	317225528	308731820	0.9732
SAMEA6141242	PRJEB35180	Sus Cebifrons	Suidae but not Sus scrofa (SUI)	20.42	0.9897	M	502050405	486719983	0.9695
SAMEA6141243	PRJEB35180	Sus Celebensis	Suidae but not Sus scrofa (SUI)	7.17	0.9673	F	277033130	257910609	0.931
SAMEA6141244	PRJEB35180	Sus Celebensis	Suidae but not Sus scrofa (SUI)	10.84	0.9868	M	315650700	300064311	0.9506
SAMEA6141245	PRJEB35180	Sus Verrucosus	Suidae but not Sus scrofa (SUI)	11.98	0.9842	F	333355677	322779946	0.9683
SAMEA6141246	PRJEB35180	Sus Verrucosus	Suidae but not Sus scrofa (SUI)	18.63	0.9872	M	324205920	322008479	0.9932
SAMEA6141247	PRJEB35180	Duroc	European domestic pig (EUD)	25.74	0.9944	M	692335219	677878911	0.9791
SAMEA6141248	PRJEB35180	Yorkshire	European domestic pig (EUD)	25.18	0.994	M	707922836	679177930	0.9594
SAMEA6141249	PRJEB35180	Sumatra	Suidae but not Sus scrofa (SUI)	12.34	0.9788	F	374300792	358939321	0.959
SAMEA6245517	PRJEB35180	Japan	Asian wild pig (ASW)	9.83	0.9572	F	284299122	278394328	0.9792
SAMEA6245518	PRJEB35180	Japan	Asian wild pig (ASW)	10.61	0.99	M	300515159	291996667	0.9717
SAMEA6798259	PRJEB37956	Yorkshire	European domestic pig (EUD)	14.17	0.9929	M	320859959	304757762	0.9498
SAMEA6798260	PRJEB37956	Yorkshire	European domestic pig (EUD)	14.73	0.9933	M	329635194	314691969	0.9547
SAMEA6798261	PRJEB37956	Yorkshire	European domestic pig (EUD)	12.54	0.9922	M	281504381	268708137	0.9545
SAMEA6798262	PRJEB37956	Yorkshire	European domestic pig (EUD)	11.92	0.9923	M	268272636	255595116	0.9527
SAMEA6798263	PRJEB37956	Yorkshire	European domestic pig (EUD)	14.6	0.9933	M	328371861	312562416	0.9519
SAMEA7059263	PRJEB39374	Yorkshire	European domestic pig (EUD)	21.54	0.9934	M	378984416	372297062	0.9824
SAMEA7059264	PRJEB39374	Yorkshire	European domestic pig (EUD)	12.33	0.9921	M	216316993	212230998	0.9811
SAMEA7059265	PRJEB39374	Yorkshire	European domestic pig (EUD)	16.99	0.9931	M	299048865	293559096	0.9816
SAMEA7059266	PRJEB39374	Yorkshire	European domestic pig (EUD)	14.21	0.9927	M	248865095	244373296	0.982
SAMEA7059267	PRJEB39374	Yorkshire	European domestic pig (EUD)	15.22	0.9933	M	266244027	261891932	0.9837
SAMEA7059268	PRJEB39374	Yorkshire	European domestic pig (EUD)	11.57	0.992	M	202539989	198978327	0.9824
SAMEA7059269	PRJEB39374	Yorkshire	European domestic pig (EUD)	21.29	0.9936	M	412498858	400568896	0.9711
SAMEA7059270	PRJEB39374	Yorkshire	European domestic pig (EUD)	10.82	0.9918	M	190401530	186880240	0.9815
SAMEA7059271	PRJEB39374	Yorkshire	European domestic pig (EUD)	14.8	0.9928	M	259863319	255320726	0.9825
SAMEA7059272	PRJEB39374	Yorkshire	European domestic pig (EUD)	20.83	0.9933	M	368371619	360879992	0.9797
SAMEA7059273	PRJEB39374	Yorkshire	European domestic pig (EUD)	11.15	0.9921	M	196571629	192530392	0.9794
SAMEA7059274	PRJEB39374	Yorkshire	European domestic pig (EUD)	14.36	0.9925	M	250768873	246719043	0.9839
SAMEA7059275	PRJEB39374	Yorkshire	European domestic pig (EUD)	22.41	0.9938	M	434838005	421940478	0.9703
SAMEA7059276	PRJEB39374	Yorkshire	European domestic pig (EUD)	17.27	0.9936	M	303765745	298035339	0.9811
SAMEA7059277	PRJEB39374	Yorkshire	European domestic pig (EUD)	13.48	0.9923	M	235736507	231689460	0.9828
SAMEA7059278	PRJEB39374	Yorkshire	European domestic pig (EUD)	28.5	0.9941	M	500836503	491761264	0.9819
SAMEA7059279	PRJEB39374	Yorkshire	European domestic pig (EUD)	26.55	0.9938	M	465887335	457669855	0.9824
SAMEA7059280	PRJEB39374	Yorkshire	European domestic pig (EUD)	26.6	0.9936	M	468148503	459599304	0.9817
SAMEA7059281	PRJEB39374	Yorkshire	European domestic pig (EUD)	26.81	0.9939	M	469642807	461890576	0.9835
[truncated: 1,623 more rows]

## Sheet: Table S3
Table S3. The counts of expressed (TPM > 0.1) genes, expressed lncRNAs, expressed enhancers, expressed exons, and alternative splicing events in 34 tissues.
[truncated: 35 more rows]

[truncated: 25 more sheets: Table S4, Table S5, Table S6, Table S7, Table S8, Table S9, Table S10, Table S11, Table S12, Table S13, Table S14, Table S15, Table S16, Table S17, Table S18, Table S19, Table S20, Table S21, Table S22, Table S23 …]
